# Supplementary material for: Understanding the mechanism and origins of stereoconvergence in nickel-catalyzed hydroarylation of 1,3-dienes with aryl boronates
Source: Royal Society of Chemistry journal article supplement (doi:10.1039/d3dt00165b), 2023-01-01
Supplement: d3dt00165b1.pdf [file d3dt00165b1.pdf]

## Supporting Information

### **Understanding the Mechanism and Origins of Stereoconvergent in Nickel-Catalyzed Hydroarylation of 1,3-Dienes with Aryl Boronates**

Keke Wang, Hui Xu, and Yanfeng Dang\*

Tianjin Key Laboratory of Molecular Optoelectronic Sciences, Department of  
Chemistry, School of Science, Tianjin University, Tianjin 300072, China

*E-mail:* yanfeng.dang@tju.edu.cn

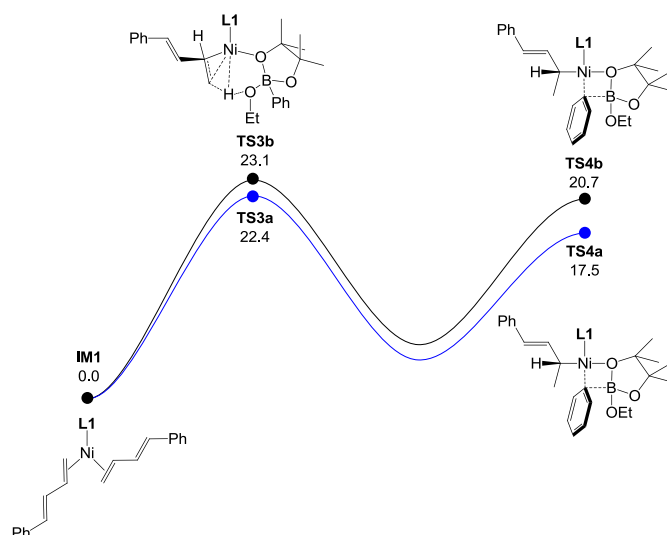

**Fig. S1.** Free energy profiles of the concerted hydronickeleation and the transmetalation for the nickel-catalyzed hydroarylation of (*E*)-1,3-diene. Energies were obtained from B3LYP-D3(BJ)(SMD,EtOH)/sdd-6-311++G\*\*//B3LYP-D3(BJ)(SMD,EtOH)/sdd-6-31G\*\* calculations.

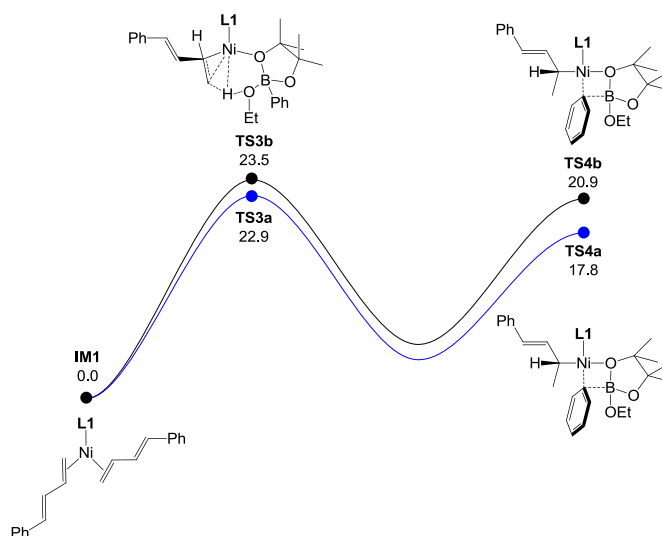

**Fig. S2.** Free energy profiles of the concerted hydronickeleation and the transmetalation for the nickel-catalyzed hydroarylation of (*E*)-1,3-diene. Energies were obtained from B3LYP-D3(BJ)(SMD,EtOH)/def2-TZVP//B3LYP-D3(BJ)(SMD,EtOH)/sdd-6-31G\*\* calculations.

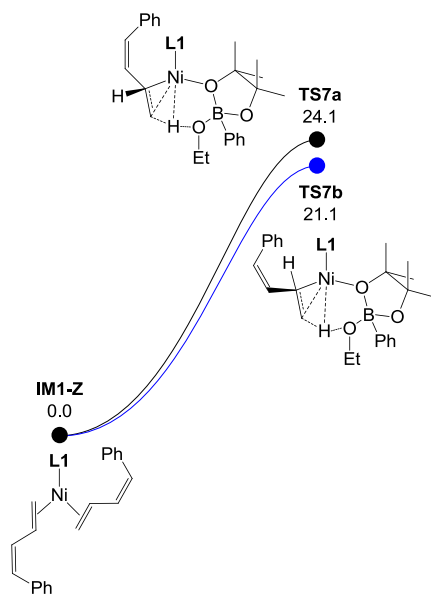

**Fig. S3.** Free energy profiles for hydronickelation of (*Z*)-diene. Energies were obtained from B3LYP-D3(BJ)(SMD,EtOH)/sdd-6-311++G\*\*//B3LYP-D3(BJ)(SMD,EtOH)/sdd-6-31G\*\* calculations.

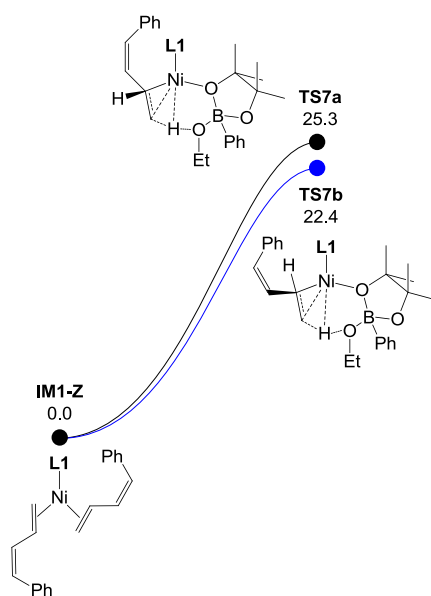

**Fig. S4.** Free energy profiles for hydronickelation of (*Z*)-diene. Energies were obtained from B3LYP-D3(BJ)(SMD,EtOH)/def2-TZVP//B3LYP-D3(BJ)(SMD,EtOH)/sdd-6-31G\*\* calculations.

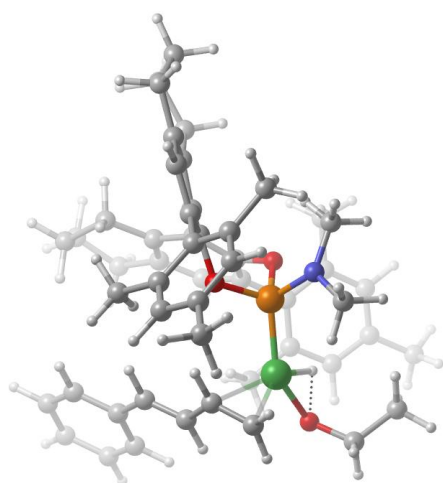

**TS1c**  
 $\Delta G^\ddagger = 42.2$  kcal/mol

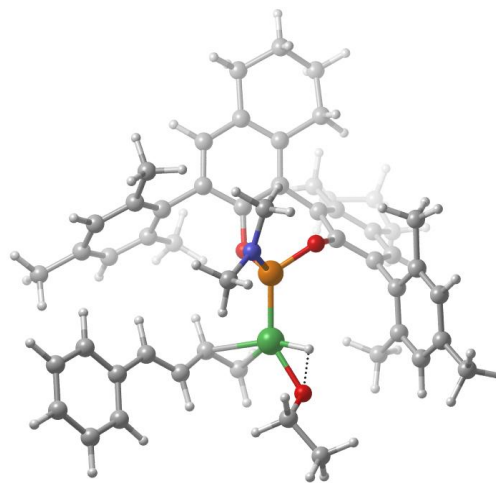

**TS1d**  
 $\Delta G^\ddagger = 42.5$  kcal/mol

**Fig. S5.** Optimized structures for the oxidative addition of EtOH to Ni(0) center with coordinated 1,3-diene substrate.

**1a**

SCF energy in Ethanol: -387.203133 a.u.

Free energy in Ethanol: -387.070384 a.u.

|   |           |           |           |
|---|-----------|-----------|-----------|
| C | -3.263700 | 0.382259  | 0.000007  |
| C | -2.857675 | -0.953028 | 0.000024  |
| C | -1.500542 | -1.270257 | 0.000020  |
| C | -0.513740 | -0.265997 | -0.000002 |
| C | -0.943055 | 1.076577  | -0.000019 |
| C | -2.297722 | 1.394055  | -0.000015 |
| H | -4.320548 | 0.634594  | 0.000011  |
| H | -3.597656 | -1.749063 | 0.000043  |
| H | -1.190831 | -2.312992 | 0.000034  |
| H | -0.211118 | 1.878950  | -0.000033 |
| H | -2.604131 | 2.436943  | -0.000026 |
| C | 0.896339  | -0.661760 | -0.000003 |
| H | 1.068661  | -1.738836 | -0.000016 |
| C | 1.981866  | 0.142643  | -0.000024 |
| H | 1.863861  | 1.225691  | -0.000046 |
| C | 3.346078  | -0.351660 | -0.000054 |
| H | 3.467111  | -1.435486 | -0.000183 |
| C | 4.438935  | 0.429616  | 0.000063  |
| H | 4.363452  | 1.514781  | 0.000192  |
| H | 5.440497  | 0.010721  | 0.000034  |

**2a**

SCF energy in Ethanol: -643.191059 a.u.

Free energy in Ethanol: -642.958135 a.u.

|   |           |           |           |
|---|-----------|-----------|-----------|
| B | 0.124331  | -0.000098 | -0.000392 |
| O | -0.635306 | 1.127242  | 0.208511  |
| O | -0.635521 | -1.127245 | -0.209435 |
| C | -2.018976 | 0.785717  | -0.082499 |
| C | -2.018950 | -0.785701 | 0.082561  |
| C | -2.293455 | 1.247930  | -1.520304 |
| H | -1.653390 | 0.722857  | -2.236386 |
| H | -3.338716 | 1.087443  | -1.805358 |
| H | -2.076124 | 2.317931  | -1.596157 |
| C | -2.919169 | 1.543042  | 0.892514  |
| H | -3.970947 | 1.272104  | 0.744237  |
| H | -2.649848 | 1.341058  | 1.931684  |
| H | -2.820070 | 2.620030  | 0.722086  |
| C | -2.292321 | -1.247796 | 1.520629  |
| H | -2.075355 | -2.317888 | 1.596236  |
| H | -1.651354 | -0.723006 | 2.236124  |
| H | -3.337240 | -1.086849 | 1.806652  |

|   |           |           |           |
|---|-----------|-----------|-----------|
| C | -2.919804 | -1.543205 | -0.891737 |
| H | -3.971490 | -1.272261 | -0.742980 |
| H | -2.651023 | -1.341505 | -1.931111 |
| H | -2.820580 | -2.620145 | -0.721078 |
| C | 1.677468  | -0.000175 | -0.000281 |
| C | 2.399911  | 1.196397  | 0.157731  |
| C | 2.400261  | -1.196540 | -0.158070 |
| C | 3.794666  | 1.199782  | 0.159340  |
| H | 1.856612  | 2.129910  | 0.280109  |
| C | 3.795016  | -1.199573 | -0.159207 |
| H | 1.857255  | -2.130201 | -0.280664 |
| C | 4.493710  | 0.000187  | 0.000196  |
| H | 4.337722  | 2.133379  | 0.283337  |
| H | 4.338341  | -2.133038 | -0.283026 |
| H | 5.581029  | 0.000314  | 0.000406  |

**3a**

SCF energy in Ethanol: -619.569257 a.u.

Free energy in Ethanol: -619.340730 a.u.

|   |           |           |           |
|---|-----------|-----------|-----------|
| C | -5.028273 | -0.965684 | -0.025981 |
| C | -4.767421 | 0.128374  | 0.799603  |
| C | -3.503499 | 0.717578  | 0.800234  |
| C | -2.468666 | 0.231987  | -0.019133 |
| C | -2.750924 | -0.871484 | -0.846973 |
| C | -4.011930 | -1.461030 | -0.849190 |
| H | -6.011445 | -1.428357 | -0.030767 |
| H | -5.547589 | 0.524983  | 1.444188  |
| H | -3.308109 | 1.570177  | 1.447054  |
| H | -1.978479 | -1.272122 | -1.496873 |
| H | -4.204590 | -2.311970 | -1.497599 |
| C | -1.155846 | 0.897730  | 0.031515  |
| H | -1.116615 | 1.754502  | 0.702390  |
| C | -0.047563 | 0.560821  | -0.646459 |
| H | -0.068450 | -0.299691 | -1.314971 |
| C | 1.295801  | 1.255677  | -0.587883 |
| H | 1.516952  | 1.599102  | -1.610990 |
| C | 2.406557  | 0.271980  | -0.213995 |
| C | 3.602145  | 0.236000  | -0.942664 |
| C | 2.268146  | -0.588939 | 0.883965  |
| C | 4.636638  | -0.630591 | -0.583743 |
| H | 3.724603  | 0.894085  | -1.800777 |
| C | 3.299368  | -1.456078 | 1.246622  |
| H | 1.340353  | -0.583218 | 1.450496  |
| C | 4.488417  | -1.479986 | 0.513836  |

|   |          |           |           |   |           |           |           |
|---|----------|-----------|-----------|---|-----------|-----------|-----------|
| H | 5.555641 | -0.644069 | -1.164265 | C | -4.461797 | -1.344336 | 2.023506  |
| H | 3.172488 | -2.117058 | 2.100323  | H | -5.236874 | -0.651165 | 2.377998  |
| H | 5.290563 | -2.157621 | 0.793981  | H | -4.636698 | -2.300651 | 2.529078  |
| C | 1.334058 | 2.494619  | 0.325207  | H | -3.503494 | -0.944082 | 2.360000  |
| H | 0.589106 | 3.237151  | 0.017635  | C | -6.498006 | -3.751632 | -1.891753 |
| H | 1.141199 | 2.224957  | 1.369603  | H | -7.397057 | -3.297621 | -2.329429 |
| H | 2.322324 | 2.963304  | 0.280811  | H | -6.027982 | -4.353118 | -2.679016 |

**L1**

SCF energy in Ethanol: -2099.336257 a.u.

Free energy in Ethanol: -2098.645475 a.u.

|   |           |           |           |   |           |           |           |
|---|-----------|-----------|-----------|---|-----------|-----------|-----------|
| P | 0.211955  | -1.862544 | -0.233618 | H | -3.668088 | -0.150456 | -3.774935 |
| N | -0.432658 | -2.728501 | 1.057320  | C | 3.881621  | -0.885283 | 0.002284  |
| C | -0.899264 | -4.084771 | 0.792877  | C | 4.277379  | -1.788311 | -1.007596 |
| H | -0.473506 | -4.784036 | 1.526004  | C | 4.352959  | -1.059068 | 1.321115  |
| H | -1.995535 | -4.151580 | 0.844380  | C | 5.140621  | -2.840143 | -0.680154 |
| H | -0.583544 | -4.402232 | -0.205945 | C | 5.218323  | -2.120793 | 1.602410  |
| C | -0.708938 | -2.240402 | 2.403800  | C | 5.628719  | -3.021885 | 0.616069  |
| H | -0.392435 | -1.202114 | 2.498210  | H | 5.435188  | -3.538445 | -1.461517 |
| H | -1.778983 | -2.314239 | 2.635780  | H | 5.580071  | -2.246694 | 2.621441  |
| H | -0.157899 | -2.840723 | 3.141944  | C | 3.932744  | -0.122725 | 2.431371  |
| O | 1.098099  | -0.792984 | 0.729025  | H | 4.104469  | 0.926387  | 2.164280  |
| O | -0.931799 | -0.743493 | -0.834168 | H | 2.863397  | -0.227770 | 2.650107  |
| C | 1.634557  | 0.295436  | 0.053012  | H | 4.487625  | -0.334161 | 3.351077  |
| C | 0.796182  | 1.383254  | -0.220073 | C | 3.769432  | -1.660416 | -2.427882 |
| C | 2.984898  | 0.267369  | -0.327745 | H | 2.673658  | -1.656438 | -2.462691 |
| C | 1.284405  | 2.443412  | -1.026000 | H | 4.104740  | -0.731567 | -2.903505 |
| C | -0.613260 | 1.359782  | 0.287954  | H | 4.122688  | -2.495631 | -3.040902 |
| C | 3.461270  | 1.372151  | -1.035645 | C | 6.589160  | -4.144096 | 0.936996  |
| C | 2.635842  | 2.437468  | -1.416795 | H | 6.434588  | -5.005120 | 0.277528  |
| C | -1.461306 | 0.311805  | -0.117294 | H | 7.633020  | -3.824450 | 0.813580  |
| C | -1.120183 | 2.368020  | 1.143072  | H | 6.476184  | -4.485625 | 1.971855  |
| H | 4.509155  | 1.386930  | -1.329328 | C | 3.233928  | 3.531347  | -2.290355 |
| C | -2.846625 | 0.337092  | 0.137986  | C | 2.334257  | 4.762165  | -2.442786 |
| C | -2.498074 | 2.401167  | 1.423937  | C | 0.895664  | 4.317567  | -2.716740 |
| C | -3.330615 | 1.414685  | 0.885605  | C | 0.345412  | 3.539458  | -1.514356 |
| C | -3.778702 | -0.716280 | -0.374355 | H | 0.248796  | 5.179399  | -2.920943 |
| C | -4.524905 | -1.515328 | 0.519278  | H | 2.358357  | 5.362388  | -1.521849 |
| C | -3.953937 | -0.892228 | -1.770030 | H | 2.712273  | 5.403287  | -3.248323 |
| C | -5.384409 | -2.498607 | 0.008921  | H | 3.432006  | 3.112116  | -3.288654 |
| C | -4.831963 | -1.875046 | -2.231323 | H | 4.214965  | 3.819351  | -1.890107 |
| C | -5.552246 | -2.699325 | -1.360177 | H | 0.144928  | 4.256981  | -0.706571 |
| H | -5.940967 | -3.119742 | 0.708902  | H | -0.626664 | 3.097565  | -1.760493 |
| H | -4.958627 | -1.998824 | -3.305563 | H | 0.874440  | 3.684675  | -3.615266 |

|   |           |          |          |   |           |          |           |
|---|-----------|----------|----------|---|-----------|----------|-----------|
| H | -4.400101 | 1.471581 | 1.076631 | C | -3.239226 | 2.974720 | 2.002123  |
| C | -3.122942 | 3.510102 | 2.259104 | C | -4.067257 | 5.074748 | 0.362572  |
| H | -3.577636 | 4.248033 | 1.579579 | C | -3.076111 | 4.304193 | 2.397033  |
| H | -3.951790 | 3.101800 | 2.851098 | C | -3.468107 | 5.374592 | 1.585094  |
| C | -0.175933 | 3.327547 | 1.857073 | H | -4.404496 | 5.888674 | -0.277132 |
| C | -2.123104 | 4.232614 | 3.168550 | H | -2.639329 | 4.510004 | 3.372601  |
| H | -1.848126 | 3.582104 | 4.011043 | C | -4.977274 | 3.540118 | -1.387774 |
| H | -2.589063 | 5.127695 | 3.598671 | H | -6.066274 | 3.511615 | -1.245736 |
| C | -0.861225 | 4.595099 | 2.380701 | H | -4.769300 | 4.360168 | -2.083885 |
| H | 0.253838  | 2.784857 | 2.714155 | H | -4.696084 | 2.599862 | -1.864739 |
| H | 0.678221  | 3.585564 | 1.227800 | C | -3.244376 | 6.803710 | 2.022104  |
| H | -1.131977 | 5.249218 | 1.538817 | H | -3.478470 | 6.939811 | 3.084286  |
| H | -0.159284 | 5.160043 | 3.006383 | H | -2.197146 | 7.104023 | 1.883242  |

### IMI

SCF energy in Ethanol: -3044.797090 a.u.

Free energy in Ethanol: -3043.793463 a.u.

|   |           |           |           |   |           |           |           |
|---|-----------|-----------|-----------|---|-----------|-----------|-----------|
| P | -0.592789 | 0.997705  | -1.145745 | H | -2.565635 | 2.284360  | 3.931976  |
| N | -1.411942 | 1.804367  | -2.375337 | C | 1.383363  | -2.442253 | -2.044488 |
| C | -2.396573 | 1.236094  | -3.291008 | C | 2.700061  | -2.242949 | -1.569236 |
| H | -3.339217 | 1.795264  | -3.244659 | C | 1.155544  | -2.573665 | -3.431726 |
| H | -2.021900 | 1.286519  | -4.324122 | C | 3.752366  | -2.168045 | -2.488654 |
| H | -2.592719 | 0.194876  | -3.043337 | C | 2.239110  | -2.490520 | -4.313829 |
| C | -1.153982 | 3.225559  | -2.582634 | C | 3.546557  | -2.289446 | -3.866087 |
| H | -0.332335 | 3.556853  | -1.940714 | H | 4.763257  | -2.009895 | -2.116490 |
| H | -0.870991 | 3.413749  | -3.628309 | H | 2.053562  | -2.593533 | -5.381402 |
| H | -2.040068 | 3.829916  | -2.346147 | C | -0.229119 | -2.821079 | -3.987420 |
| O | -0.803863 | -0.541446 | -1.789474 | H | -0.732496 | -3.642675 | -3.464900 |
| O | -1.611182 | 0.874203  | 0.205124  | H | -0.863958 | -1.934336 | -3.881103 |
| C | -0.808647 | -1.668848 | -0.976560 | H | -0.180099 | -3.075865 | -5.050920 |
| C | -1.906132 | -1.887558 | -0.131105 | C | 3.000241  | -2.093923 | -0.093057 |
| C | 0.252244  | -2.585896 | -1.075025 | H | 2.328869  | -1.377338 | 0.390983  |
| C | -1.861843 | -2.959080 | 0.797994  | H | 2.892355  | -3.039692 | 0.450111  |
| C | -3.090292 | -0.970830 | -0.184456 | H | 4.029210  | -1.751623 | 0.058370  |
| C | 0.205935  | -3.691527 | -0.222689 | C | 4.706458  | -2.232377 | -4.833132 |
| C | -0.793731 | -3.870532 | 0.738745  | H | 5.447695  | -1.486026 | -4.526249 |
| C | -2.906670 | 0.391906  | 0.098200  | H | 5.225581  | -3.198779 | -4.891032 |
| C | -4.392485 | -1.446009 | -0.476769 | H | 4.372061  | -1.980563 | -5.845004 |
| H | 1.003006  | -4.428496 | -0.291247 | C | -0.654533 | -5.027503 | 1.716189  |
| C | -3.991080 | 1.265705  | 0.308281  | C | -1.925844 | -5.308223 | 2.523835  |
| C | -5.489975 | -0.584056 | -0.301241 | C | -2.502302 | -3.989541 | 3.045503  |
| C | -5.269525 | 0.729019  | 0.128750  | C | -2.933074 | -3.097539 | 1.873602  |
| C | -3.812371 | 2.688854  | 0.737865  | H | -3.361431 | -4.166402 | 3.704002  |
| C | -4.259018 | 3.755481  | -0.071788 | H | -2.674153 | -5.806806 | 1.890890  |

|    |           |           |           |                                           |           |           |           |
|----|-----------|-----------|-----------|-------------------------------------------|-----------|-----------|-----------|
| H  | -1.700313 | -5.995344 | 3.348341  | C                                         | 3.147262  | -1.105891 | 3.550237  |
| H  | 0.162125  | -4.790890 | 2.414687  | C                                         | 3.656133  | -2.181964 | 4.271891  |
| H  | -0.334985 | -5.926750 | 1.173449  | H                                         | 3.205389  | -3.853169 | 5.566426  |
| H  | -3.851796 | -3.520207 | 1.443507  | H                                         | 0.756519  | -3.390680 | 5.573944  |
| H  | -3.212281 | -2.102363 | 2.238002  | H                                         | -0.147919 | -1.483384 | 4.286798  |
| H  | -1.739377 | -3.474818 | 3.646224  | H                                         | 3.832093  | -0.469954 | 2.996996  |
| H  | -6.128568 | 1.372354  | 0.306331  | H                                         | 4.726952  | -2.369267 | 4.268767  |
| C  | -6.922554 | -1.051921 | -0.515488 | C                                         | 1.165346  | 0.278151  | 2.789021  |
| H  | -7.367506 | -1.281912 | 0.465234  | H                                         | 0.084644  | 0.369781  | 2.891881  |
| H  | -7.519881 | -0.228668 | -0.927203 | C                                         | 1.800061  | 1.182247  | 2.008254  |
| C  | -4.596529 | -2.825022 | -1.092223 | H                                         | 2.879791  | 1.122303  | 1.874474  |
| C  | -7.035815 | -2.292485 | -1.408462 | C                                         | 1.143468  | 2.290280  | 1.320150  |
| H  | -6.832480 | -2.019093 | -2.453652 | H                                         | 0.088551  | 2.445167  | 1.532686  |
| H  | -8.060460 | -2.682408 | -1.376666 | C                                         | 1.879744  | 3.285934  | 0.676396  |
| C  | -6.029051 | -3.355824 | -0.960871 | H                                         | 1.400556  | 4.224061  | 0.400766  |
| H  | -4.351393 | -2.745083 | -2.163305 | H                                         | 2.963091  | 3.313446  | 0.761694  |
| H  | -3.882119 | -3.546361 | -0.690811 |                                           |           |           |           |
| H  | -6.231283 | -3.631477 | 0.084523  | <b>IM2</b>                                |           |           |           |
| H  | -6.136906 | -4.271140 | -1.555451 | SCF energy in Ethanol: -2425.428828 a.u.  |           |           |           |
| Ni | 1.337855  | 1.893817  | -0.719686 | Free energy in Ethanol: -2424.661780 a.u. |           |           |           |
| C  | 8.811530  | 0.997082  | 1.218268  | P                                         | -0.378031 | -1.172706 | -0.628036 |
| C  | 8.571816  | 2.363460  | 1.063060  | N                                         | 0.348928  | -1.669750 | -2.070885 |
| C  | 7.406119  | 2.804444  | 0.439427  | C                                         | 0.395912  | -3.095150 | -2.371925 |
| C  | 6.443217  | 1.898346  | -0.047468 | H                                         | -0.101350 | -3.303311 | -3.331047 |
| C  | 6.705043  | 0.522088  | 0.117849  | H                                         | 1.433430  | -3.453415 | -2.432665 |
| C  | 7.869172  | 0.080770  | 0.739959  | H                                         | -0.121435 | -3.657428 | -1.588848 |
| H  | 9.719112  | 0.648694  | 1.703625  | C                                         | 0.859670  | -0.818347 | -3.138120 |
| H  | 9.294158  | 3.089233  | 1.428252  | H                                         | 0.871750  | 0.223729  | -2.824968 |
| H  | 7.228803  | 3.871585  | 0.324068  | H                                         | 1.878792  | -1.117055 | -3.416341 |
| H  | 5.991130  | -0.209816 | -0.248854 | H                                         | 0.227358  | -0.906606 | -4.035584 |
| H  | 8.044456  | -0.986464 | 0.852310  | O                                         | -0.783037 | 0.380685  | -1.192253 |
| C  | 5.237111  | 2.423201  | -0.692001 | O                                         | 0.859479  | -0.688134 | 0.448473  |
| H  | 5.190732  | 3.511354  | -0.757825 | C                                         | -0.965351 | 1.401906  | -0.281751 |
| C  | 4.204005  | 1.718344  | -1.211136 | C                                         | 0.173661  | 2.025144  | 0.250351  |
| H  | 4.218532  | 0.629558  | -1.179797 | C                                         | -2.267707 | 1.811734  | 0.061883  |
| C  | 3.030303  | 2.310855  | -1.838699 | C                                         | 0.021168  | 3.037270  | 1.232867  |
| H  | 3.065863  | 3.390314  | -1.987049 | C                                         | 1.531013  | 1.539317  | -0.156688 |
| C  | 2.078865  | 1.556148  | -2.551389 | C                                         | -2.378067 | 2.892653  | 0.939298  |
| H  | 2.232835  | 0.488880  | -2.701515 | C                                         | -1.271068 | 3.495514  | 1.545217  |
| H  | 1.471501  | 2.040580  | -3.313410 | C                                         | 1.856584  | 0.188776  | 0.074951  |
| C  | 2.803260  | -3.016260 | 5.001938  | C                                         | 2.504579  | 2.398039  | -0.721909 |
| C  | 1.431221  | -2.757240 | 5.003297  | H                                         | -3.372563 | 3.256245  | 1.190583  |
| C  | 0.921722  | -1.680748 | 4.278665  | C                                         | 3.181799  | -0.280695 | -0.026034 |
| C  | 1.763590  | -0.832882 | 3.532268  | C                                         | 3.826163  | 1.938106  | -0.862292 |



|   |           |           |           |                                           |           |           |           |
|---|-----------|-----------|-----------|-------------------------------------------|-----------|-----------|-----------|
| C | 4.142718  | 0.633466  | -0.468312 | C                                         | 1.230310  | 3.580893  | 1.985197  |
| C | 3.569851  | -1.677120 | 0.350022  | H                                         | 1.750509  | 4.799131  | 3.694233  |
| C | 4.145955  | -2.549875 | -0.598915 | H                                         | 0.070542  | 6.020596  | 2.232515  |
| C | 3.407199  | -2.120690 | 1.686412  | H                                         | -0.464856 | 5.927004  | 3.909722  |
| C | 4.504456  | -3.848273 | -0.211377 | H                                         | -1.995485 | 4.134345  | 3.459827  |
| C | 3.790085  | -3.419471 | 2.028431  | H                                         | -2.260181 | 5.298720  | 2.177308  |
| C | 4.330099  | -4.308013 | 1.092998  | H                                         | 1.791638  | 4.281045  | 1.351666  |
| H | 4.935458  | -4.515256 | -0.956334 | H                                         | 1.922507  | 2.757899  | 2.195865  |
| H | 3.665984  | -3.745291 | 3.059859  | H                                         | 0.520466  | 3.583980  | 4.037722  |
| C | 4.418907  | -2.138026 | -2.030770 | H                                         | 5.177591  | 0.304368  | -0.533838 |
| H | 5.425371  | -1.711874 | -2.141381 | C                                         | 4.940692  | 2.837355  | -1.379296 |
| H | 4.365160  | -3.004775 | -2.698833 | H                                         | 5.518526  | 3.211041  | -0.519377 |
| H | 3.714271  | -1.383890 | -2.385978 | H                                         | 5.645632  | 2.243628  | -1.975044 |
| C | 4.701224  | -5.719313 | 1.485901  | C                                         | 2.106358  | 3.754332  | -1.291099 |
| H | 5.232181  | -5.742921 | 2.445007  | C                                         | 4.437191  | 4.037645  | -2.189405 |
| H | 3.809600  | -6.350880 | 1.597444  | H                                         | 4.086206  | 3.700798  | -3.175263 |
| H | 5.343559  | -6.188898 | 0.733433  | H                                         | 5.261575  | 4.738643  | -2.369373 |
| C | 2.851264  | -1.217613 | 2.764419  | C                                         | 3.282658  | 4.723870  | -1.453951 |
| H | 3.318084  | -0.226143 | 2.741388  | H                                         | 1.664393  | 3.576192  | -2.284526 |
| H | 1.773060  | -1.071929 | 2.637680  | H                                         | 1.307506  | 4.210684  | -0.703063 |
| H | 3.023680  | -1.649770 | 3.755549  | H                                         | 3.628987  | 5.062070  | -0.466260 |
| C | -3.498182 | 1.112341  | -0.426784 | H                                         | 2.951046  | 5.617951  | -1.996287 |
| C | -4.316956 | 0.420156  | 0.494624  | Ni                                        | -1.874192 | -2.260856 | 0.131714  |
| C | -3.871333 | 1.156118  | -1.788941 | C                                         | -3.185607 | -4.770273 | 2.107795  |
| C | -5.468589 | -0.235879 | 0.030686  | H                                         | -3.478578 | -5.211118 | 3.067523  |
| C | -5.025217 | 0.485628  | -2.208093 | H                                         | -3.313403 | -5.523184 | 1.323518  |
| C | -5.838737 | -0.221755 | -1.318830 | H                                         | -2.126340 | -4.496050 | 2.157007  |
| H | -6.115117 | -0.735665 | 0.752395  | C                                         | -4.038427 | -3.549016 | 1.822369  |
| H | -5.299872 | 0.526858  | -3.260590 | H                                         | -5.100096 | -3.819731 | 1.761573  |
| C | -3.052846 | 1.924547  | -2.800035 | H                                         | -3.912066 | -2.789237 | 2.602436  |
| H | -2.835203 | 2.939833  | -2.449212 | O                                         | -3.646404 | -2.996517 | 0.541863  |
| H | -2.091324 | 1.431278  | -2.977263 | H                                         | -4.229299 | -2.243923 | 0.309848  |
| H | -3.582374 | 1.999309  | -3.755168 |                                           |           |           |           |
| C | -3.980638 | 0.345067  | 1.969715  | <b>TS1a</b>                               |           |           |           |
| H | -2.955302 | -0.010366 | 2.125331  | SCF energy in Ethanol: -2425.393285 a.u.  |           |           |           |
| H | -4.061841 | 1.318979  | 2.464070  | Free energy in Ethanol: -2424.634172 a.u. |           |           |           |
| H | -4.664275 | -0.338252 | 2.485634  | P                                         | -0.397612 | -1.134320 | -0.468767 |
| C | -7.085761 | -0.926988 | -1.800629 | N                                         | 0.124220  | -1.830333 | -1.900515 |
| H | -6.848098 | -1.696635 | -2.545525 | C                                         | 0.190559  | -3.285848 | -2.009329 |
| H | -7.616392 | -1.413178 | -0.975299 | H                                         | -0.295064 | -3.612783 | -2.938685 |
| H | -7.782432 | -0.225504 | -2.276362 | H                                         | 1.232429  | -3.635977 | -2.013634 |
| C | -1.523385 | 4.588016  | 2.574917  | H                                         | -0.328872 | -3.747119 | -1.165233 |
| C | -0.254763 | 5.323679  | 3.018226  | C                                         | 0.677935  | -1.118347 | -3.049452 |
| C | 0.859464  | 4.308672  | 3.283774  | H                                         | 0.683321  | -0.044973 | -2.867754 |

|   |           |           |           |    |           |           |           |
|---|-----------|-----------|-----------|----|-----------|-----------|-----------|
| H | 1.702102  | -1.452479 | -3.255466 | H  | -5.176775 | 0.863217  | -3.472003 |
| H | 0.066967  | -1.319166 | -3.940914 | C  | -2.918908 | 2.160770  | -2.804129 |
| O | -0.799606 | 0.352819  | -1.126092 | H  | -2.713762 | 3.149597  | -2.377716 |
| O | 0.908843  | -0.669130 | 0.483880  | H  | -1.951079 | 1.673629  | -2.968954 |
| C | -0.982286 | 1.412069  | -0.240175 | H  | -3.393983 | 2.304812  | -3.779813 |
| C | 0.153412  | 2.028545  | 0.299723  | C  | -4.106673 | 0.237755  | 1.782299  |
| C | -2.288195 | 1.828377  | 0.063945  | H  | -3.051731 | 0.041902  | 2.001707  |
| C | -0.013501 | 3.025368  | 1.296160  | H  | -4.389845 | 1.133749  | 2.350025  |
| C | 1.514883  | 1.574926  | -0.131292 | H  | -4.687086 | -0.602084 | 2.174800  |
| C | -2.412046 | 2.885810  | 0.966644  | C  | -7.016312 | -0.716883 | -2.223021 |
| C | -1.311907 | 3.466723  | 1.608221  | H  | -6.741629 | -1.639267 | -2.752291 |
| C | 1.876712  | 0.230397  | 0.064396  | H  | -7.745459 | -0.987561 | -1.452129 |
| C | 2.456379  | 2.463372  | -0.705760 | H  | -7.517331 | -0.066618 | -2.949428 |
| H | -3.409932 | 3.246411  | 1.206926  | C  | -1.578032 | 4.527582  | 2.666754  |
| C | 3.199677  | -0.221755 | -0.099923 | C  | -0.319242 | 5.266258  | 3.132187  |
| C | 3.780937  | 2.029610  | -0.895234 | C  | 0.806482  | 4.258580  | 3.376442  |
| C | 4.130142  | 0.719492  | -0.550856 | C  | 1.188500  | 3.565988  | 2.061878  |
| C | 3.614103  | -1.627174 | 0.206142  | H  | 1.690926  | 4.749785  | 3.799802  |
| C | 4.155760  | -2.455841 | -0.801535 | H  | -0.000133 | 5.986746  | 2.365453  |
| C | 3.508967  | -2.125508 | 1.529236  | H  | -0.539079 | 5.844072  | 4.037914  |
| C | 4.527155  | -3.769887 | -0.484228 | H  | -2.045660 | 4.041959  | 3.536638  |
| C | 3.904682  | -3.437153 | 1.799455  | H  | -2.323524 | 5.238886  | 2.287521  |
| C | 4.403255  | -4.285407 | 0.805096  | H  | 1.740993  | 4.287822  | 1.444754  |
| H | 4.931452  | -4.402790 | -1.272564 | H  | 1.890908  | 2.747362  | 2.254876  |
| H | 3.824948  | -3.805752 | 2.820587  | H  | 0.475086  | 3.512105  | 4.112036  |
| C | 4.390261  | -1.981513 | -2.221661 | H  | 5.166042  | 0.407393  | -0.663172 |
| H | 5.411994  | -1.598511 | -2.349213 | C  | 4.865048  | 2.960968  | -1.419519 |
| H | 4.271434  | -2.808583 | -2.930496 | H  | 5.456253  | 3.325475  | -0.564996 |
| H | 3.713203  | -1.176160 | -2.512681 | H  | 5.565491  | 2.393572  | -2.045161 |
| C | 4.788220  | -5.711714 | 1.122720  | C  | 2.019487  | 3.825116  | -1.231697 |
| H | 5.373277  | -5.772948 | 2.047980  | C  | 4.319484  | 4.168884  | -2.189397 |
| H | 3.900509  | -6.342812 | 1.262880  | H  | 3.948244  | 3.847273  | -3.172826 |
| H | 5.383200  | -6.155064 | 0.317433  | H  | 5.126601  | 4.887940  | -2.375185 |
| C | 3.008200  | -1.266735 | 2.668947  | C  | 3.174067  | 4.818293  | -1.407855 |
| H | 3.458398  | -0.267730 | 2.649273  | H  | 1.549788  | 3.660199  | -2.214544 |
| H | 1.921936  | -1.135473 | 2.619329  | H  | 1.232359  | 4.255537  | -0.609841 |
| H | 3.249825  | -1.727711 | 3.631937  | H  | 3.541849  | 5.142942  | -0.423490 |
| C | -3.497045 | 1.171808  | -0.524554 | H  | 2.810739  | 5.716578  | -1.921772 |
| C | -4.358273 | 0.413615  | 0.298735  | Ni | -1.768772 | -2.216510 | 0.674301  |
| C | -3.799617 | 1.332362  | -1.895845 | C  | -4.763947 | -4.481231 | 1.414883  |
| C | -5.491085 | -0.183908 | -0.270754 | H  | -5.226746 | -5.435254 | 1.131799  |
| C | -4.945283 | 0.726096  | -2.417050 | H  | -5.085341 | -4.229546 | 2.431277  |
| C | -5.801900 | -0.044942 | -1.624470 | H  | -5.126314 | -3.701390 | 0.736238  |
| H | -6.147738 | -0.771418 | 0.368135  | C  | -3.245212 | -4.584058 | 1.345863  |

|   |           |           |          |   |           |           |           |
|---|-----------|-----------|----------|---|-----------|-----------|-----------|
| H | -2.891199 | -5.391815 | 2.004850 | C | -0.903386 | -7.206011 | -0.760139 |
| H | -2.934686 | -4.828848 | 0.321394 | H | -0.997275 | -7.732439 | 0.196010  |
| O | -2.672353 | -3.350482 | 1.784765 | H | -1.913928 | -6.896155 | -1.058879 |
| H | -1.301194 | -3.380565 | 1.516728 | H | -0.548776 | -7.922291 | -1.509151 |

**TS1b**

SCF energy in Ethanol: -3068.623032 a.u.

Free energy in Ethanol: -3067.604390 a.u.

|   |           |           |           |   |           |           |           |
|---|-----------|-----------|-----------|---|-----------|-----------|-----------|
| N | 0.398810  | -0.592652 | -2.668711 | C | 0.670810  | 4.002913  | -0.670488 |
| C | -0.611406 | -1.491191 | -3.228975 | C | -0.577248 | 4.463784  | -0.195110 |
| H | -0.907533 | -1.145742 | -4.228310 | C | 1.121739  | 4.401134  | -1.948206 |
| H | -0.227918 | -2.517351 | -3.308241 | C | -1.354982 | 5.291127  | -1.013142 |
| H | -1.501072 | -1.510513 | -2.591705 | C | 0.311680  | 5.231858  | -2.729818 |
| C | 1.579854  | -0.427770 | -3.513783 | C | -0.931353 | 5.687930  | -2.284479 |
| H | 2.333415  | 0.170340  | -3.005329 | H | -2.318821 | 5.635389  | -0.642536 |
| H | 2.011098  | -1.403266 | -3.770045 | H | 0.668029  | 5.535056  | -3.712730 |
| H | 1.299854  | 0.078660  | -4.448043 | C | 2.466937  | 3.966325  | -2.485471 |
| O | 1.307482  | 1.231886  | -1.243472 | H | 3.264658  | 4.118493  | -1.749531 |
| O | 0.940794  | -0.981803 | 0.021062  | H | 2.466889  | 2.901610  | -2.745358 |
| C | 1.852348  | 1.813681  | -0.101819 | H | 2.725639  | 4.531543  | -3.386589 |
| C | 2.752666  | 1.064439  | 0.666657  | C | -1.100363 | 4.077217  | 1.171283  |
| C | 1.533082  | 3.147305  | 0.202953  | H | -1.084274 | 2.991299  | 1.318608  |
| C | 3.196356  | 1.583053  | 1.909755  | H | -0.505731 | 4.517126  | 1.980066  |
| C | 3.227987  | -0.267079 | 0.173120  | H | -2.130667 | 4.419873  | 1.299492  |
| C | 2.087877  | 3.668018  | 1.374668  | C | -1.775103 | 6.609831  | -3.134443 |
| C | 2.863677  | 2.904582  | 2.254263  | H | -2.844452 | 6.453659  | -2.954977 |
| C | 2.295750  | -1.291964 | -0.055383 | H | -1.560288 | 7.664381  | -2.913820 |
| C | 4.603180  | -0.517965 | -0.059461 | H | -1.584960 | 6.456920  | -4.202272 |
| H | 1.881006  | 4.705980  | 1.625421  | C | 3.293273  | 3.533577  | 3.571494  |
| C | 2.688008  | -2.617723 | -0.316852 | C | 4.362071  | 2.729461  | 4.318682  |
| C | 5.018528  | -1.832289 | -0.338688 | C | 3.988888  | 1.245001  | 4.311522  |
| C | 4.063675  | -2.850149 | -0.417033 | C | 3.986908  | 0.707291  | 2.874744  |
| C | 1.731199  | -3.761109 | -0.451676 | H | 4.689438  | 0.659466  | 4.918936  |
| C | 1.673966  | -4.512725 | -1.647472 | H | 5.339679  | 2.860498  | 3.832862  |
| C | 0.944968  | -4.162075 | 0.655878  | H | 4.464681  | 3.107473  | 5.342863  |
| C | 0.814122  | -5.615764 | -1.724972 | H | 2.407128  | 3.629475  | 4.217123  |
| C | 0.114468  | -5.280005 | 0.536355  | H | 3.639665  | 4.559025  | 3.387822  |
| C | 0.024461  | -6.018590 | -0.648090 | H | 5.030217  | 0.617928  | 2.541781  |
| H | 0.773387  | -6.181884 | -2.654159 | H | 3.582984  | -0.311155 | 2.850546  |
| H | -0.473770 | -5.586452 | 1.398795  | H | 2.994324  | 1.116838  | 4.761590  |
| C | 2.534457  | -4.204649 | -2.856379 | H | 4.400253  | -3.869545 | -0.591496 |
| H | 3.452139  | -4.808432 | -2.857396 | C | 6.486575  | -2.194255 | -0.513728 |
| H | 1.999275  | -4.441519 | -3.782739 | H | 6.855420  | -2.627173 | 0.429133  |
| H | 2.844662  | -3.158855 | -2.893129 | H | 6.580692  | -2.989921 | -1.263302 |

|    |           |           |           |                                           |           |           |           |
|----|-----------|-----------|-----------|-------------------------------------------|-----------|-----------|-----------|
| C  | 5.605443  | 0.627862  | -0.136994 | C                                         | -2.486644 | -0.677744 | 3.083952  |
| C  | 7.373044  | -1.000892 | -0.885762 | H                                         | -3.383912 | -0.627171 | 3.714357  |
| H  | 7.189258  | -0.710481 | -1.929950 | H                                         | -2.269569 | -1.737897 | 2.901552  |
| H  | 8.429855  | -1.285982 | -0.817692 | C                                         | -1.313772 | 0.010017  | 3.768309  |
| C  | 7.064301  | 0.186572  | 0.029825  | H                                         | -0.416348 | -0.033896 | 3.140275  |
| H  | 5.493317  | 1.092860  | -1.129411 | H                                         | -1.543279 | 1.062672  | 3.965242  |
| H  | 5.361856  | 1.417727  | 0.575839  | H                                         | -1.088493 | -0.481371 | 4.722339  |
| H  | 7.250840  | -0.100901 | 1.074945  | H                                         | -1.757756 | 0.068027  | 0.829342  |
| H  | 7.728934  | 1.031379  | -0.188168 |                                           |           |           |           |
| P  | 0.187707  | -0.001702 | -1.111655 |                                           |           |           |           |
| Ni | -1.825476 | 0.295305  | -0.669679 | <b>IM3</b>                                |           |           |           |
| B  | -4.055208 | -0.364034 | 1.054018  | SCF energy in Ethanol: -2657.543602 a.u.  |           |           |           |
| O  | -3.691777 | 0.264986  | -0.296402 | Free energy in Ethanol: -2656.696299 a.u. |           |           |           |
| O  | -5.218443 | 0.372905  | 1.471668  | P                                         | 0.064031  | -0.701122 | -0.931883 |
| C  | -4.777963 | 1.139016  | -0.710803 | N                                         | 0.587737  | -0.457970 | -2.508071 |
| C  | -5.402645 | 1.543486  | 0.680576  | C                                         | 0.092822  | 0.547032  | -3.444174 |
| C  | -5.727089 | 0.292516  | -1.572051 | H                                         | 0.916598  | 1.175501  | -3.804616 |
| H  | -6.140785 | -0.539421 | -0.996830 | H                                         | -0.369852 | 0.057478  | -4.313575 |
| H  | -6.551581 | 0.893605  | -1.970821 | H                                         | -0.651883 | 1.180091  | -2.965372 |
| H  | -5.167930 | -0.124276 | -2.416896 | C                                         | 1.682469  | -1.271672 | -3.024990 |
| C  | -4.214069 | 2.295379  | -1.535064 | H                                         | 1.958781  | -2.035467 | -2.294188 |
| H  | -5.008506 | 3.006330  | -1.792293 | H                                         | 1.380812  | -1.771110 | -3.956505 |
| H  | -3.427412 | 2.835765  | -1.002570 | H                                         | 2.569736  | -0.655975 | -3.226796 |
| H  | -3.793529 | 1.920128  | -2.476604 | O                                         | -1.449497 | 0.002541  | -1.141980 |
| C  | -4.666920 | 2.720636  | 1.343816  | O                                         | 0.744658  | 0.457026  | 0.092215  |
| H  | -5.032733 | 2.820169  | 2.371134  | C                                         | -2.159705 | 0.437665  | -0.028958 |
| H  | -3.592351 | 2.534448  | 1.387771  | C                                         | -1.749023 | 1.617628  | 0.608976  |
| H  | -4.847021 | 3.668805  | 0.822557  | C                                         | -3.289114 | -0.286148 | 0.392581  |
| C  | -6.902455 | 1.852139  | 0.619692  | C                                         | -2.374531 | 2.003084  | 1.822915  |
| H  | -7.110824 | 2.699269  | -0.045366 | C                                         | -0.626864 | 2.424504  | 0.032134  |
| H  | -7.474475 | 0.986570  | 0.277316  | C                                         | -3.953174 | 0.192290  | 1.524570  |
| H  | -7.258675 | 2.113650  | 1.621775  | C                                         | -3.498859 | 1.286465  | 2.267987  |
| C  | -4.315494 | -1.955715 | 0.992111  | C                                         | 0.631723  | 1.820305  | -0.124194 |
| C  | -5.563608 | -2.493680 | 1.351044  | C                                         | -0.791002 | 3.782999  | -0.334403 |
| C  | -3.331943 | -2.863765 | 0.558815  | H                                         | -4.846538 | -0.331662 | 1.857591  |
| C  | -5.824201 | -3.864648 | 1.277530  | C                                         | 1.784131  | 2.560828  | -0.449835 |
| H  | -6.341188 | -1.814371 | 1.690574  | C                                         | 0.344718  | 4.541121  | -0.671020 |
| C  | -3.581610 | -4.235378 | 0.473412  | C                                         | 1.601685  | 3.927794  | -0.680754 |
| H  | -2.345190 | -2.492298 | 0.282186  | C                                         | 3.145512  | 1.946478  | -0.539957 |
| C  | -4.832627 | -4.741918 | 0.834484  | C                                         | 3.874126  | 1.991259  | -1.750010 |
| H  | -6.801206 | -4.248582 | 1.564322  | C                                         | 3.735474  | 1.346845  | 0.600732  |
| H  | -2.797033 | -4.905045 | 0.130412  | C                                         | 5.142621  | 1.398190  | -1.810529 |
| H  | -5.031271 | -5.809687 | 0.772613  | C                                         | 5.005924  | 0.776749  | 0.494153  |
| O  | -2.780895 | -0.015932 | 1.853448  | C                                         | 5.725949  | 0.781212  | -0.704748 |
|    |           |           |           | H                                         | 5.686943  | 1.425238  | -2.753215 |

|   |           |           |           |                                           |           |           |           |
|---|-----------|-----------|-----------|-------------------------------------------|-----------|-----------|-----------|
| H | 5.441092  | 0.306782  | 1.373539  | H                                         | -1.840302 | 2.291531  | 4.658027  |
| C | 3.357209  | 2.676375  | -2.999230 | H                                         | 2.476417  | 4.533677  | -0.906213 |
| H | 3.682133  | 3.724901  | -3.043837 | C                                         | 0.256360  | 6.029160  | -0.979311 |
| H | 3.746816  | 2.185685  | -3.898145 | H                                         | 0.550116  | 6.591224  | -0.079055 |
| H | 2.266830  | 2.682443  | -3.053066 | H                                         | 0.995857  | 6.289886  | -1.746878 |
| C | 7.099417  | 0.156312  | -0.784119 | C                                         | -2.181453 | 4.387417  | -0.489995 |
| H | 7.848438  | 0.766752  | -0.262090 | C                                         | -1.142163 | 6.486858  | -1.408382 |
| H | 7.110472  | -0.834890 | -0.316065 | H                                         | -1.352513 | 6.135500  | -2.428556 |
| H | 7.430719  | 0.046103  | -1.822116 | H                                         | -1.184081 | 7.582572  | -1.435731 |
| C | 3.040149  | 1.322510  | 1.943359  | C                                         | -2.196974 | 5.920210  | -0.453929 |
| H | 2.576429  | 2.287896  | 2.175964  | H                                         | -2.573031 | 4.059107  | -1.466051 |
| H | 2.249115  | 0.565739  | 1.964610  | H                                         | -2.876688 | 3.979568  | 0.246427  |
| H | 3.752855  | 1.085955  | 2.739414  | H                                         | -1.991407 | 6.272569  | 0.567568  |
| C | -3.801498 | -1.504558 | -0.309555 | H                                         | -3.197886 | 6.283274  | -0.717730 |
| C | -3.777966 | -2.756229 | 0.344689  | C                                         | 5.478054  | -2.738058 | 2.928016  |
| C | -4.365159 | -1.402942 | -1.600668 | C                                         | 5.658765  | -3.068660 | 1.583331  |
| C | -4.302934 | -3.877878 | -0.307718 | C                                         | 4.559181  | -3.362020 | 0.777698  |
| C | -4.879686 | -2.549774 | -2.213697 | C                                         | 3.248680  | -3.342785 | 1.291587  |
| C | -4.860157 | -3.798615 | -1.586580 | C                                         | 3.084148  | -2.992258 | 2.646677  |
| H | -4.275623 | -4.840552 | 0.199952  | C                                         | 4.181711  | -2.699535 | 3.451929  |
| H | -5.314689 | -2.461451 | -3.207696 | H                                         | 6.332862  | -2.509598 | 3.558870  |
| C | -4.439260 | -0.079590 | -2.328278 | H                                         | 6.660080  | -3.107563 | 1.160869  |
| H | -4.861413 | 0.707347  | -1.692647 | H                                         | 4.713270  | -3.626738 | -0.266134 |
| H | -3.443853 | 0.256439  | -2.639487 | H                                         | 2.082797  | -2.926297 | 3.063928  |
| H | -5.063701 | -0.163441 | -3.223462 | H                                         | 4.024798  | -2.430506 | 4.493675  |
| C | -3.187206 | -2.922774 | 1.729406  | C                                         | 2.122597  | -3.699199 | 0.412917  |
| H | -2.197160 | -2.457886 | 1.804301  | H                                         | 2.384968  | -3.775325 | -0.642188 |
| H | -3.812933 | -2.464529 | 2.504297  | C                                         | 0.949138  | -4.310478 | 0.861107  |
| H | -3.084274 | -3.984036 | 1.978147  | H                                         | 0.838762  | -4.446498 | 1.936353  |
| C | -5.454374 | -5.016441 | -2.256310 | C                                         | -0.240468 | -4.592015 | 0.096156  |
| H | -4.997879 | -5.940565 | -1.885665 | H                                         | -1.101874 | -4.893182 | 0.689081  |
| H | -6.534306 | -5.088668 | -2.067937 | C                                         | -0.478520 | -4.220330 | -1.232245 |
| H | -5.318198 | -4.983836 | -3.342979 | H                                         | 0.313254  | -4.183585 | -1.979858 |
| C | -4.225180 | 1.631010  | 3.560277  | H                                         | -1.480398 | -4.347089 | -1.631263 |
| C | -3.822221 | 2.985600  | 4.151421  | Ni                                        | 0.218037  | -2.617304 | -0.091846 |
| C | -2.299033 | 3.129007  | 4.113409  | <b>TS2</b>                                |           |           |           |
| C | -1.805609 | 3.142661  | 2.660672  | SCF energy in Ethanol: -3455.839763 a.u.  |           |           |           |
| H | -1.976366 | 4.048520  | 4.616539  | Free energy in Ethanol: -3454.668762 a.u. |           |           |           |
| H | -4.277445 | 3.800524  | 3.570436  | P                                         | -0.872198 | -0.227434 | -0.361644 |
| H | -4.204342 | 3.074950  | 5.175475  | N                                         | -0.119931 | 0.275454  | -1.759309 |
| H | -4.012173 | 0.845251  | 4.301085  | C                                         | -0.625223 | 0.145542  | -3.124762 |
| H | -5.309017 | 1.591631  | 3.389030  | H                                         | -0.704320 | 1.130265  | -3.600036 |
| H | -2.073602 | 4.111998  | 2.218711  | H                                         | 0.067207  | -0.467501 | -3.717104 |
| H | -0.711057 | 3.099261  | 2.631119  | H                                         | -1.604536 | -0.330348 | -3.126500 |

|   |           |           |           |   |           |           |           |
|---|-----------|-----------|-----------|---|-----------|-----------|-----------|
| C | 1.167247  | 0.971349  | -1.642862 | C | 0.088257  | -5.826494 | -0.065734 |
| H | 1.436949  | 1.089915  | -0.591467 | H | 0.374083  | -5.514116 | 2.039619  |
| H | 1.973526  | 0.414537  | -2.132616 | H | -0.490414 | -5.923230 | -2.135210 |
| H | 1.091762  | 1.974754  | -2.079446 | C | -2.524719 | -4.178697 | -2.308526 |
| O | -1.973650 | -1.271292 | -1.049414 | H | -3.600002 | -4.239024 | -2.104848 |
| O | -1.901488 | 0.951433  | 0.232787  | H | -2.319557 | -3.162164 | -2.662007 |
| C | -3.073152 | -1.644308 | -0.272003 | H | -2.295025 | -4.871298 | -3.124100 |
| C | -4.114149 | -0.721207 | -0.117732 | C | -1.482236 | -3.688506 | 2.677673  |
| C | -3.094963 | -2.919133 | 0.313825  | H | -1.647969 | -2.605639 | 2.644582  |
| C | -5.185434 | -1.032181 | 0.758279  | H | -2.373952 | -4.128828 | 3.140625  |
| C | -4.035872 | 0.600423  | -0.817869 | H | -0.638670 | -3.884075 | 3.347377  |
| C | -4.221419 | -3.233453 | 1.078007  | C | 1.197761  | -6.843399 | -0.202003 |
| C | -5.244926 | -2.314417 | 1.334004  | H | 1.548280  | -7.187910 | 0.776267  |
| C | -2.950422 | 1.449804  | -0.541624 | H | 0.868571  | -7.720794 | -0.770867 |
| C | -5.033511 | 1.026515  | -1.727211 | H | 2.061428  | -6.422357 | -0.733004 |
| H | -4.285186 | -4.224996 | 1.520896  | C | -6.364183 | -2.730623 | 2.278057  |
| C | -2.907799 | 2.782599  | -0.987478 | C | -7.542237 | -1.751653 | 2.309441  |
| C | -5.007181 | 2.352285  | -2.195789 | C | -7.016726 | -0.316463 | 2.386315  |
| C | -3.976900 | 3.203934  | -1.785595 | C | -6.223820 | 0.023600  | 1.117937  |
| C | -1.810296 | 3.735567  | -0.631496 | H | -7.839482 | 0.398762  | 2.503743  |
| C | -1.010399 | 4.318822  | -1.640273 | H | -8.151017 | -1.866637 | 1.401300  |
| C | -1.610100 | 4.114159  | 0.718283  | H | -8.195126 | -1.982278 | 3.159480  |
| C | -0.004471 | 5.224503  | -1.279572 | H | -5.948810 | -2.818092 | 3.293444  |
| C | -0.602863 | 5.031633  | 1.027192  | H | -6.707532 | -3.738278 | 2.009716  |
| C | 0.222997  | 5.590515  | 0.047031  | H | -6.937915 | 0.151943  | 0.292986  |
| H | 0.613580  | 5.658044  | -2.063825 | H | -5.726108 | 0.993592  | 1.228540  |
| H | -0.460889 | 5.317102  | 2.067188  | H | -6.374381 | -0.209102 | 3.271864  |
| C | -1.208095 | 4.034443  | -3.115710 | H | -3.987291 | 4.237440  | -2.123746 |
| H | -1.880024 | 4.770433  | -3.577801 | C | -6.097716 | 2.906947  | -3.101179 |
| H | -0.254953 | 4.095815  | -3.652191 | H | -6.799153 | 3.490014  | -2.484560 |
| H | -1.645143 | 3.050668  | -3.298015 | H | -5.658785 | 3.621435  | -3.808570 |
| C | 1.332181  | 6.547493  | 0.416359  | C | -6.045315 | 0.038423  | -2.293468 |
| H | 1.039439  | 7.200323  | 1.246538  | C | -6.884024 | 1.826203  | -3.851922 |
| H | 2.234649  | 6.006993  | 0.732826  | H | -6.264422 | 1.405347  | -4.656424 |
| H | 1.614566  | 7.181575  | -0.430567 | H | -7.764320 | 2.271524  | -4.330791 |
| C | -2.479315 | 3.581065  | 1.835123  | C | -7.289985 | 0.705512  | -2.890552 |
| H | -3.542699 | 3.618852  | 1.571676  | H | -5.537784 | -0.528933 | -3.089712 |
| H | -2.235166 | 2.539383  | 2.068443  | H | -6.328281 | -0.708143 | -1.548949 |
| H | -2.333928 | 4.167557  | 2.747206  | H | -7.912797 | 1.122734  | -2.085804 |
| C | -1.974606 | -3.899832 | 0.168788  | H | -7.899534 | -0.047857 | -3.404042 |
| C | -1.214968 | -4.269227 | 1.302158  | C | 0.279140  | 3.153561  | 4.902854  |
| C | -1.706930 | -4.508169 | -1.080235 | C | 1.301655  | 3.381269  | 3.979779  |
| C | -0.199383 | -5.225710 | 1.160419  | C | 1.697810  | 2.368944  | 3.106266  |
| C | -0.683696 | -5.454353 | -1.172176 | C | 1.086196  | 1.102866  | 3.148371  |

|    |           |           |           |                         |                   |           |          |
|----|-----------|-----------|-----------|-------------------------|-------------------|-----------|----------|
| C  | 0.047635  | 0.891308  | 4.075597  | H                       | 7.874333          | 0.954689  | 0.328941 |
| C  | -0.349207 | 1.904334  | 4.944093  | C                       | 6.203880          | 3.855462  | 0.940858 |
| H  | -0.028903 | 3.941924  | 5.584488  | H                       | 4.111566          | 4.175849  | 0.517236 |
| H  | 1.799382  | 4.346541  | 3.943158  | H                       | 8.253920          | 3.239821  | 1.202233 |
| H  | 2.510354  | 2.544901  | 2.405349  | H                       | 6.371104          | 4.864654  | 1.310892 |
| H  | -0.460492 | -0.069311 | 4.100464  | O                       | 4.981484          | -1.119100 | 0.695408 |
| H  | -1.153691 | 1.722919  | 5.652092  | H                       | 3.861699          | -1.771848 | 0.568805 |
| C  | 1.587292  | 0.037533  | 2.261167  | C                       | 5.885349          | -1.714063 | 1.623215 |
| H  | 2.305947  | 0.379809  | 1.515972  | H                       | 5.559087          | -2.752611 | 1.789306 |
| C  | 1.687360  | -1.319108 | 2.671556  | H                       | 6.875796          | -1.755439 | 1.159288 |
| H  | 1.310161  | -1.614909 | 3.647876  | C                       | 5.919078          | -0.961698 | 2.950835 |
| C  | 2.061217  | -2.341651 | 1.772260  | H                       | 6.595094          | -1.462836 | 3.655853 |
| H  | 1.967212  | -3.353822 | 2.164745  | H                       | 6.267060          | 0.065056  | 2.805272 |
| C  | 2.632436  | -2.226132 | 0.454606  | H                       | 4.920168          | -0.923927 | 3.401026 |
| H  | 2.348559  | -1.368625 | -0.168248 |                         |                   |           |          |
| H  | 2.633415  | -3.156183 | -0.114133 |                         |                   |           |          |
| Ni | 0.402736  | -1.186666 | 1.102182  |                         |                   |           |          |
| B  | 5.512812  | -0.291629 | -0.560852 |                         |                   |           |          |
| O  | 6.705284  | -0.906469 | -1.107692 |                         |                   |           |          |
| O  | 4.457170  | -0.443374 | -1.565468 |                         |                   |           |          |
| C  | 6.352738  | -1.636088 | -2.282403 |                         |                   |           |          |
| C  | 5.072490  | -0.863790 | -2.786860 |                         |                   |           |          |
| C  | 6.051510  | -3.098908 | -1.899728 |                         |                   |           |          |
| H  | 5.181173  | -3.163119 | -1.240626 |                         |                   |           |          |
| H  | 5.871257  | -3.728810 | -2.779426 |                         |                   |           |          |
| H  | 6.915291  | -3.505308 | -1.362108 |                         |                   |           |          |
| C  | 7.544019  | -1.606198 | -3.246191 |                         |                   |           |          |
| H  | 7.295435  | -2.074288 | -4.207016 |                         |                   |           |          |
| H  | 7.878159  | -0.582340 | -3.430180 |                         |                   |           |          |
| H  | 8.384293  | -2.157880 | -2.809504 |                         |                   |           |          |
| C  | 5.429631  | 0.391497  | -3.605843 |                         |                   |           |          |
| H  | 4.523326  | 0.991885  | -3.742757 |                         |                   |           |          |
| H  | 6.161300  | 1.006661  | -3.074621 |                         |                   |           |          |
| H  | 5.829718  | 0.143753  | -4.596320 |                         |                   |           |          |
| C  | 4.079732  | -1.721428 | -3.578398 |                         |                   |           |          |
| H  | 4.544579  | -2.137620 | -4.480798 |                         |                   |           |          |
| H  | 3.693329  | -2.546587 | -2.974354 |                         |                   |           |          |
| H  | 3.227587  | -1.108755 | -3.897548 |                         |                   |           |          |
| C  | 5.769086  | 1.218238  | -0.029472 |                         |                   |           |          |
| C  | 4.730871  | 2.165093  | 0.028749  |                         |                   |           |          |
| C  | 7.038473  | 1.647991  | 0.395951  |                         |                   |           |          |
| C  | 4.935832  | 3.463513  | 0.503345  |                         |                   |           |          |
| H  | 3.743975  | 1.883803  | -0.334815 |                         |                   |           |          |
| C  | 7.257930  | 2.941124  | 0.880504  |                         |                   |           |          |
|    |           |           |           | <b>IM4a</b>             |                   |           |          |
|    |           |           |           | SCF energy in Ethanol:  | -2812.687805 a.u. |           |          |
|    |           |           |           | Free energy in Ethanol: | -2811.766166 a.u. |           |          |
| P  | -0.216192 | -1.489441 | -0.288224 |                         |                   |           |          |
| N  | 0.294824  | -2.777215 | -1.244608 |                         |                   |           |          |
| C  | 0.363938  | -4.109007 | -0.653387 |                         |                   |           |          |
| H  | -0.193001 | -4.828163 | -1.270476 |                         |                   |           |          |
| H  | 1.405336  | -4.451062 | -0.567459 |                         |                   |           |          |
| H  | -0.080955 | -4.099490 | 0.345997  |                         |                   |           |          |
| C  | 0.743579  | -2.716248 | -2.631282 |                         |                   |           |          |
| H  | 0.776753  | -1.684940 | -2.978619 |                         |                   |           |          |
| H  | 1.741299  | -3.159700 | -2.735942 |                         |                   |           |          |
| H  | 0.053157  | -3.279397 | -3.277032 |                         |                   |           |          |
| O  | -0.667618 | -0.506687 | -1.594923 |                         |                   |           |          |
| O  | 1.127680  | -0.611423 | 0.243548  |                         |                   |           |          |
| C  | -0.860992 | 0.842599  | -1.337571 |                         |                   |           |          |
| C  | 0.264619  | 1.656657  | -1.155909 |                         |                   |           |          |
| C  | -2.169276 | 1.352765  | -1.294714 |                         |                   |           |          |
| C  | 0.086062  | 2.995408  | -0.725430 |                         |                   |           |          |
| C  | 1.628523  | 1.079305  | -1.383250 |                         |                   |           |          |
| C  | -2.307539 | 2.704911  | -0.973426 |                         |                   |           |          |
| C  | -1.217271 | 3.517914  | -0.642046 |                         |                   |           |          |
| C  | 2.042971  | -0.016740 | -0.606911 |                         |                   |           |          |
| C  | 2.508692  | 1.610304  | -2.357616 |                         |                   |           |          |
| H  | -3.307080 | 3.133786  | -0.947604 |                         |                   |           |          |
| C  | 3.370057  | -0.488935 | -0.632464 |                         |                   |           |          |
| C  | 3.834530  | 1.143944  | -2.409258 |                         |                   |           |          |
| C  | 4.242713  | 0.139762  | -1.525406 |                         |                   |           |          |
| C  | 3.855996  | -1.589692 | 0.258484  |                         |                   |           |          |

|   |           |           |           |    |           |           |           |
|---|-----------|-----------|-----------|----|-----------|-----------|-----------|
| C | 4.344172  | -2.799421 | -0.281126 | H  | 0.036652  | 6.113244  | -1.145669 |
| C | 3.881603  | -1.399303 | 1.662210  | H  | -0.466584 | 6.750898  | 0.419863  |
| C | 4.782621  | -3.810563 | 0.585953  | H  | -1.903327 | 4.871290  | 0.863924  |
| C | 4.338430  | -2.429754 | 2.486138  | H  | -2.277513 | 5.385740  | -0.773263 |
| C | 4.778849  | -3.654037 | 1.971131  | H  | 1.826538  | 4.186297  | -1.203574 |
| H | 5.144406  | -4.744193 | 0.157870  | H  | 1.996001  | 3.207492  | 0.234290  |
| H | 4.358176  | -2.268332 | 3.562518  | H  | 0.617993  | 4.751097  | 1.541788  |
| C | 4.456975  | -3.050827 | -1.770891 | H  | 5.279644  | -0.188407 | -1.549618 |
| H | 5.467144  | -2.817977 | -2.135037 | C  | 4.857918  | 1.731283  | -3.370939 |
| H | 4.272850  | -4.106161 | -2.001796 | H  | 5.477530  | 2.458981  | -2.823809 |
| H | 3.762675  | -2.442269 | -2.352415 | H  | 5.546464  | 0.943134  | -3.700812 |
| C | 5.229444  | -4.766147 | 2.889747  | C  | 1.999916  | 2.575235  | -3.421834 |
| H | 5.834882  | -4.381163 | 3.718563  | C  | 4.230410  | 2.433617  | -4.580094 |
| H | 4.371741  | -5.288494 | 3.334529  | H  | 3.815313  | 1.685978  | -5.271022 |
| H | 5.825434  | -5.512435 | 2.353847  | H  | 5.000886  | 2.983981  | -5.133839 |
| C | 3.464482  | -0.087379 | 2.286528  | C  | 3.110424  | 3.370138  | -4.119215 |
| H | 3.968708  | 0.761558  | 1.809491  | H  | 1.470765  | 1.976519  | -4.180396 |
| H | 2.387268  | 0.077749  | 2.185601  | H  | 1.244858  | 3.251248  | -3.015900 |
| H | 3.714269  | -0.071890 | 3.352517  | H  | 3.523495  | 4.119439  | -3.428064 |
| C | -3.365563 | 0.503743  | -1.590590 | H  | 2.688410  | 3.922261  | -4.967956 |
| C | -4.309643 | 0.221182  | -0.577104 | Ni | -1.584326 | -2.048117 | 1.282852  |
| C | -3.578896 | 0.004110  | -2.896927 | C  | -0.546255 | 4.949717  | 4.560876  |
| C | -5.425856 | -0.574320 | -0.882350 | C  | 0.672354  | 4.280048  | 4.689290  |
| C | -4.711294 | -0.773545 | -3.158307 | C  | 0.757899  | 2.916966  | 4.409070  |
| C | -5.649538 | -1.078030 | -2.167512 | C  | -0.366481 | 2.175606  | 3.992365  |
| H | -6.146205 | -0.788322 | -0.094467 | C  | -1.587519 | 2.872472  | 3.865306  |
| H | -4.865053 | -1.150042 | -4.167887 | C  | -1.674702 | 4.233181  | 4.146459  |
| C | -2.611657 | 0.298796  | -4.020361 | H  | -0.618638 | 6.011283  | 4.781579  |
| H | -2.363601 | 1.364825  | -4.067623 | H  | 1.559785  | 4.819426  | 5.011657  |
| H | -1.671159 | -0.245721 | -3.880759 | H  | 1.712024  | 2.405658  | 4.516321  |
| H | -3.035358 | 0.003228  | -4.985391 | H  | -2.479117 | 2.342344  | 3.543379  |
| C | -4.154484 | 0.755377  | 0.830759  | H  | -2.631954 | 4.739816  | 4.046161  |
| H | -3.118383 | 0.691343  | 1.174800  | C  | -0.214532 | 0.744366  | 3.723051  |
| H | -4.451297 | 1.809756  | 0.895311  | H  | 0.799992  | 0.361193  | 3.827879  |
| H | -4.784793 | 0.195257  | 1.529351  | C  | -1.186002 | -0.130649 | 3.374960  |
| C | -6.882131 | -1.892729 | -2.486314 | H  | -2.213565 | 0.225258  | 3.295327  |
| H | -7.316182 | -2.335989 | -1.583683 | C  | -1.004694 | -1.554729 | 3.112058  |
| H | -7.659720 | -1.270235 | -2.948941 | H  | -0.007154 | -1.947647 | 3.316039  |
| H | -6.658934 | -2.702848 | -3.189674 | C  | -2.121278 | -2.449500 | 3.105599  |
| C | -1.491527 | 4.932540  | -0.154550 | H  | -3.106945 | -2.068794 | 3.387195  |
| C | -0.246072 | 5.823772  | -0.122901 | H  | -1.961601 | -3.494697 | 3.376178  |
| C | 0.910839  | 5.064104  | 0.531167  | C  | -3.450748 | -5.141185 | 0.759108  |
| C | 1.286087  | 3.838436  | -0.312091 | H  | -3.063804 | -5.536387 | -0.185997 |
| H | 1.790910  | 5.709630  | 0.641518  | H  | -2.627013 | -5.080140 | 1.476662  |



|   |           |           |           |   |          |           |           |
|---|-----------|-----------|-----------|---|----------|-----------|-----------|
| H | -4.199812 | -5.839445 | 1.149710  | H | 3.395002 | 3.334259  | -3.797700 |
| C | -4.074264 | -3.773553 | 0.553383  | H | 3.198042 | 1.724849  | -4.485089 |
| H | -4.891224 | -3.827141 | -0.177090 | H | 1.916463 | 2.435711  | -3.484244 |
| H | -4.470638 | -3.380497 | 1.497303  | C | 6.928055 | -0.162409 | -1.708994 |
| O | -3.067750 | -2.874491 | 0.042301  | H | 7.760596 | 0.510398  | -1.461343 |
| H | -3.514362 | -2.089307 | -0.328213 | H | 7.029958 | -1.048287 | -1.073068 |

#### IM4b

SCF energy in Ethanol: -2812.684178 a.u.

Free energy in Ethanol: -2811.761693 a.u.

|   |           |           |           |   |           |           |           |
|---|-----------|-----------|-----------|---|-----------|-----------|-----------|
| P | -0.179594 | -0.652072 | -0.796352 | H | 4.128550  | 1.158113  | 2.149551  |
| N | 0.185523  | -0.594382 | -2.435913 | C | -4.089245 | -0.990569 | 0.183816  |
| C | 1.064695  | -1.618659 | -2.990274 | C | -4.186603 | -2.209392 | 0.897517  |
| H | 0.579185  | -2.118157 | -3.840705 | C | -4.776500 | -0.847633 | -1.045508 |
| H | 2.013585  | -1.182309 | -3.332247 | C | -4.965597 | -3.249811 | 0.371839  |
| H | 1.285274  | -2.373954 | -2.230226 | C | -5.545382 | -1.913024 | -1.528380 |
| C | -0.281231 | 0.388419  | -3.407126 | C | -5.665576 | -3.119534 | -0.831548 |
| H | -0.831632 | 1.186534  | -2.910957 | H | -5.036359 | -4.181871 | 0.929573  |
| H | 0.565492  | 0.824358  | -3.950412 | H | -6.079022 | -1.788258 | -2.468653 |
| H | -0.946510 | -0.089928 | -4.141907 | C | -4.720986 | 0.439933  | -1.835430 |
| O | -1.658982 | 0.177623  | -0.939298 | H | -4.952588 | 1.305794  | -1.204867 |
| O | 0.705512  | 0.528958  | 0.020875  | H | -3.721310 | 0.604239  | -2.252104 |
| C | -2.206944 | 0.745401  | 0.200690  | H | -5.437321 | 0.419172  | -2.662617 |
| C | -1.620390 | 1.907606  | 0.722703  | C | -3.477614 | -2.421016 | 2.218539  |
| C | -3.354355 | 0.171331  | 0.776503  | H | -2.450144 | -2.045023 | 2.189327  |
| C | -2.063681 | 2.408828  | 1.972601  | H | -3.988702 | -1.905842 | 3.040804  |
| C | -0.522213 | 2.585144  | -0.036795 | H | -3.442923 | -3.485872 | 2.469392  |
| C | -3.836751 | 0.762542  | 1.947143  | C | -6.555311 | -4.230435 | -1.341193 |
| C | -3.192309 | 1.830784  | 2.579449  | H | -6.194663 | -5.214478 | -1.022698 |
| C | 0.661154  | 1.875976  | -0.303956 | H | -7.579036 | -4.121639 | -0.958524 |
| C | -0.649137 | 3.922953  | -0.484123 | H | -6.617741 | -4.228439 | -2.434825 |
| H | -4.738059 | 0.354381  | 2.399448  | C | -3.722921 | 2.300988  | 3.925665  |
| C | 1.800645  | 2.503450  | -0.844595 | C | -3.130910 | 3.636253  | 4.389310  |
| C | 0.474318  | 4.567265  | -1.031883 | C | -1.616212 | 3.632598  | 4.167420  |
| C | 1.673488  | 3.860289  | -1.160318 | C | -1.300424 | 3.528418  | 2.669775  |
| C | 3.102196  | 1.801330  | -1.074064 | H | -1.156196 | 4.540900  | 4.574939  |
| C | 3.653215  | 1.717086  | -2.373024 | H | -3.578653 | 4.463969  | 3.820668  |
| C | 3.827302  | 1.268784  | 0.020268  | H | -3.377294 | 3.806928  | 5.444186  |
| C | 4.878750  | 1.063218  | -2.557046 | H | -3.492171 | 1.532552  | 4.679244  |
| C | 5.051676  | 0.637022  | -0.210434 | H | -4.818697 | 2.358213  | 3.885354  |
| C | 5.594393  | 0.514526  | -1.493561 | H | -1.532896 | 4.495115  | 2.202127  |
| H | 5.284579  | 0.989517  | -3.565010 | H | -0.225567 | 3.380028  | 2.517255  |
| H | 5.594552  | 0.225232  | 0.637000  | H | -1.171134 | 2.783120  | 4.704559  |
| C | 2.997037  | 2.330518  | -3.594036 | H | 2.545471  | 4.378954  | -1.552167 |

|    |           |           |           |                                           |           |           |           |
|----|-----------|-----------|-----------|-------------------------------------------|-----------|-----------|-----------|
| C  | 0.440358  | 6.030248  | -1.450933 | SCF energy in Ethanol: -3455.876459 a.u.  |           |           |           |
| H  | 0.891930  | 6.635769  | -0.649553 | Free energy in Ethanol: -3454.696074 a.u. |           |           |           |
| H  | 1.080985  | 6.175243  | -2.329846 | P                                         | 0.260746  | 0.377469  | -0.591654 |
| C  | -2.005341 | 4.618895  | -0.496898 | N                                         | 0.881484  | 1.192578  | -1.918498 |
| C  | -0.972103 | 6.556958  | -1.726629 | C                                         | 2.150456  | 1.911744  | -1.780785 |
| H  | -1.345749 | 6.144132  | -2.674621 | H                                         | 2.779063  | 1.716991  | -2.657362 |
| H  | -0.947983 | 7.647319  | -1.843478 | H                                         | 1.988115  | 2.992610  | -1.693555 |
| C  | -1.915391 | 6.146594  | -0.592767 | H                                         | 2.696236  | 1.569519  | -0.903026 |
| H  | -2.557098 | 4.246791  | -1.374979 | C                                         | 0.166532  | 1.492325  | -3.158558 |
| H  | -2.610966 | 4.326592  | 0.363308  | H                                         | -0.753688 | 0.915277  | -3.218850 |
| H  | -1.544310 | 6.559348  | 0.356816  | H                                         | -0.078859 | 2.559679  | -3.231036 |
| H  | -2.917989 | 6.563870  | -0.747952 | H                                         | 0.805988  | 1.228733  | -4.011653 |
| Ni | -0.283146 | -2.615258 | 0.095776  | O                                         | -0.842531 | -0.540024 | -1.461589 |
| C  | 7.467048  | -2.584323 | 1.905409  | O                                         | -0.767368 | 1.385744  | 0.280460  |
| C  | 6.842806  | -1.855642 | 2.919807  | C                                         | -2.101815 | -0.912554 | -1.001679 |
| C  | 5.451250  | -1.799639 | 2.989944  | C                                         | -3.047078 | 0.075523  | -0.684439 |
| C  | 4.636404  | -2.465677 | 2.051491  | C                                         | -2.425529 | -2.281670 | -0.963649 |
| C  | 5.287265  | -3.188831 | 1.029631  | C                                         | -4.265964 | -0.305558 | -0.063807 |
| C  | 6.676460  | -3.250343 | 0.961956  | C                                         | -2.790055 | 1.521236  | -0.988867 |
| H  | 8.551071  | -2.634046 | 1.848673  | C                                         | -3.677070 | -2.616974 | -0.442215 |
| H  | 7.440339  | -1.332043 | 3.662222  | C                                         | -4.574332 | -1.670109 | 0.060500  |
| H  | 4.975902  | -1.237001 | 3.790681  | C                                         | -1.710376 | 2.169610  | -0.374572 |
| H  | 4.697958  | -3.703754 | 0.276503  | C                                         | -3.643500 | 2.264315  | -1.842746 |
| H  | 7.148081  | -3.822352 | 0.166133  | H                                         | -3.955138 | -3.667994 | -0.414512 |
| C  | 3.180780  | -2.388183 | 2.188966  | C                                         | -1.570164 | 3.570803  | -0.379174 |
| H  | 2.826796  | -1.718038 | 2.973245  | C                                         | -3.498402 | 3.662031  | -1.901364 |
| C  | 2.254934  | -3.079618 | 1.485984  | C                                         | -2.507308 | 4.283115  | -1.133423 |
| H  | 2.584161  | -3.784394 | 0.720881  | C                                         | -0.517915 | 4.289431  | 0.406409  |
| C  | 0.812622  | -3.019927 | 1.700668  | C                                         | 0.436181  | 5.113442  | -0.230704 |
| H  | 0.498378  | -2.377856 | 2.526884  | C                                         | -0.518286 | 4.199618  | 1.820575  |
| C  | -0.042581 | -4.098941 | 1.308684  | C                                         | 1.403005  | 5.768580  | 0.544091  |
| H  | 0.404273  | -4.988501 | 0.856342  | C                                         | 0.459427  | 4.877874  | 2.551784  |
| H  | -0.938845 | -4.307908 | 1.895034  | C                                         | 1.443662  | 5.656174  | 1.933445  |
| O  | -1.726224 | -3.290308 | -1.266129 | H                                         | 2.142347  | 6.388219  | 0.039838  |
| H  | -2.551926 | -2.812536 | -1.065100 | H                                         | 0.444100  | 4.805840  | 3.637750  |
| C  | -2.022862 | -4.693944 | -1.413448 | C                                         | 0.444295  | 5.358747  | -1.725733 |
| H  | -1.051354 | -5.191370 | -1.413604 | H                                         | -0.167600 | 6.232561  | -1.987889 |
| H  | -2.582231 | -5.042907 | -0.537241 | H                                         | 1.460402  | 5.563320  | -2.079363 |
| C  | -2.781111 | -4.963970 | -2.704949 | H                                         | 0.047227  | 4.513339  | -2.291080 |
| H  | -2.199254 | -4.631633 | -3.571076 | C                                         | 2.516248  | 6.344855  | 2.745029  |
| H  | -2.979239 | -6.037397 | -2.811028 | H                                         | 2.130005  | 6.689221  | 3.710988  |
| H  | -3.742172 | -4.438079 | -2.712525 | H                                         | 3.353320  | 5.665598  | 2.956380  |
|    |           |           |           | H                                         | 2.925968  | 7.211334  | 2.215216  |
|    |           |           |           | C                                         | -1.587559 | 3.431827  | 2.565460  |

**TS3a**

|   |           |           |           |    |           |           |           |
|---|-----------|-----------|-----------|----|-----------|-----------|-----------|
| H | -2.592497 | 3.731319  | 2.244471  | H  | -4.050329 | 1.189054  | -3.636404 |
| H | -1.501945 | 2.354081  | 2.395244  | H  | -5.044046 | 0.668295  | -2.304120 |
| H | -1.510391 | 3.610766  | 3.642542  | H  | -6.445163 | 2.703471  | -2.478131 |
| C | -1.566913 | -3.372648 | -1.526991 | H  | -6.317654 | 1.943392  | -4.063350 |
| C | -1.036626 | -4.373633 | -0.684602 | Ni | 1.762174  | -0.415020 | 0.803520  |
| C | -1.393534 | -3.477180 | -2.926026 | C  | -4.391360 | -3.311524 | 5.012280  |
| C | -0.346678 | -5.451046 | -1.251476 | C  | -4.615569 | -1.945520 | 4.829620  |
| C | -0.695824 | -4.570686 | -3.448731 | C  | -3.622226 | -1.141100 | 4.271821  |
| C | -0.163165 | -5.570857 | -2.630953 | C  | -2.377787 | -1.672394 | 3.879868  |
| H | 0.060055  | -6.216397 | -0.592728 | C  | -2.166917 | -3.051455 | 4.084712  |
| H | -0.576630 | -4.647470 | -4.528003 | C  | -3.158862 | -3.856672 | 4.637454  |
| C | -1.966541 | -2.448242 | -3.874672 | H  | -5.161199 | -3.942416 | 5.448114  |
| H | -3.024382 | -2.250756 | -3.667040 | H  | -5.562979 | -1.502974 | 5.127178  |
| H | -1.436963 | -1.492393 | -3.789312 | H  | -3.802823 | -0.076498 | 4.140757  |
| H | -1.881539 | -2.786960 | -4.912062 | H  | -1.215086 | -3.498174 | 3.814443  |
| C | -1.193889 | -4.308817 | 0.818481  | H  | -2.967673 | -4.916878 | 4.783571  |
| H | -1.037120 | -3.294226 | 1.196333  | C  | -1.370310 | -0.767680 | 3.318678  |
| H | -2.196822 | -4.610611 | 1.144223  | H  | -1.678560 | 0.275419  | 3.258546  |
| H | -0.476703 | -4.975877 | 1.309055  | C  | -0.114510 | -1.072316 | 2.922080  |
| C | 0.608468  | -6.730314 | -3.218026 | H  | 0.231296  | -2.104796 | 2.986478  |
| H | 1.682859  | -6.507707 | -3.274808 | C  | 0.889366  | -0.098214 | 2.480260  |
| H | 0.498338  | -7.634855 | -2.609897 | H  | 0.566586  | 0.941214  | 2.549898  |
| H | 0.272467  | -6.962018 | -4.234572 | C  | 2.303037  | -0.377208 | 2.797099  |
| C | -5.845252 | -2.160848 | 0.735526  | H  | 2.828309  | 0.480728  | 3.229942  |
| C | -6.903625 | -1.068030 | 0.914243  | H  | 2.449102  | -1.272107 | 3.411704  |
| C | -6.243782 | 0.192078  | 1.479117  | B  | 4.747318  | -0.675110 | 0.105815  |
| C | -5.219074 | 0.751785  | 0.483626  | O  | 3.336349  | -0.956085 | -0.373060 |
| H | -6.991077 | 0.963569  | 1.701938  | O  | 5.567847  | -1.645419 | -0.553505 |
| H | -7.372587 | -0.833750 | -0.052482 | C  | 3.397012  | -2.026784 | -1.367925 |
| H | -7.702048 | -1.426044 | 1.575359  | C  | 4.765896  | -2.727378 | -1.022852 |
| H | -5.579251 | -2.560542 | 1.725242  | C  | 3.402216  | -1.365580 | -2.753303 |
| H | -6.254234 | -3.006774 | 0.167707  | H  | 4.273921  | -0.716533 | -2.875958 |
| H | -5.768853 | 1.227474  | -0.339782 | H  | 3.405971  | -2.114233 | -3.553074 |
| H | -4.639197 | 1.556260  | 0.950396  | H  | 2.498581  | -0.758738 | -2.860025 |
| H | -5.747635 | -0.057050 | 2.426539  | C  | 2.181899  | -2.936765 | -1.230008 |
| H | -2.443421 | 5.368764  | -1.142463 | H  | 2.279481  | -3.807066 | -1.888480 |
| C | -4.428322 | 4.535433  | -2.732217 | H  | 2.063286  | -3.300393 | -0.206311 |
| H | -5.176845 | 4.985860  | -2.061926 | H  | 1.263768  | -2.418160 | -1.517421 |
| H | -3.862476 | 5.376243  | -3.152720 | C  | 4.638975  | -3.796571 | 0.081073  |
| C | -4.624880 | 1.560865  | -2.772916 | H  | 5.647484  | -4.073877 | 0.406294  |
| C | -5.158278 | 3.774192  | -3.844284 | H  | 4.098569  | -3.417616 | 0.950972  |
| H | -4.457265 | 3.539477  | -4.657772 | H  | 4.137193  | -4.700789 | -0.282250 |
| H | -5.943212 | 4.407177  | -4.275458 | C  | 5.471697  | -3.352453 | -2.231986 |
| C | -5.743365 | 2.471559  | -3.292542 | H  | 4.854236  | -4.129636 | -2.698339 |

|   |          |           |           |   |           |           |           |
|---|----------|-----------|-----------|---|-----------|-----------|-----------|
| H | 5.718810 | -2.600240 | -2.984792 | C | 3.410778  | 3.108471  | 1.594066  |
| H | 6.407892 | -3.816762 | -1.903746 | C | 2.331067  | -0.800941 | -1.043948 |
| C | 5.282223 | 0.837431  | -0.102434 | C | 4.267064  | 0.433971  | -1.855265 |
| C | 6.238699 | 1.119799  | -1.094022 | H | 2.131734  | 4.823901  | 1.733702  |
| C | 4.824651 | 1.927295  | 0.662029  | C | 2.726048  | -1.967678 | -1.729021 |
| C | 6.706545 | 2.416437  | -1.321520 | C | 4.674136  | -0.713320 | -2.558442 |
| H | 6.625834 | 0.295641  | -1.687413 | C | 3.925018  | -1.887849 | -2.444664 |
| C | 5.278379 | 3.230576  | 0.441583  | C | 1.959924  | -3.254229 | -1.709783 |
| H | 4.090652 | 1.760797  | 1.449533  | C | 1.483473  | -3.832760 | -2.909815 |
| C | 6.224421 | 3.479804  | -0.554977 | C | 1.785161  | -3.952875 | -0.490553 |
| H | 7.450177 | 2.597964  | -2.094844 | C | 0.788407  | -5.047760 | -2.856966 |
| H | 4.894996 | 4.049061  | 1.047359  | C | 1.094348  | -5.168237 | -0.490112 |
| H | 6.585598 | 4.490910  | -0.728660 | C | 0.570107  | -5.727780 | -1.658781 |
| H | 3.411536 | -0.704401 | 1.955036  | H | 0.413289  | -5.474074 | -3.786001 |
| O | 4.582906 | -0.993279 | 1.619004  | H | 0.975548  | -5.698781 | 0.452692  |
| C | 5.645106 | -0.715960 | 2.540393  | C | 1.718239  | -3.226044 | -4.279298 |
| H | 5.501287 | 0.279877  | 2.980075  | H | 2.575099  | -3.699912 | -4.777581 |
| H | 6.575789 | -0.690030 | 1.965661  | H | 0.848555  | -3.382594 | -4.927015 |
| C | 5.712274 | -1.787601 | 3.619823  | H | 1.929334  | -2.156502 | -4.237916 |
| H | 5.877089 | -2.773020 | 3.172756  | C | -0.212723 | -7.019535 | -1.627896 |
| H | 6.538466 | -1.575555 | 4.308884  | H | -0.028420 | -7.623328 | -2.523589 |
| H | 4.786663 | -1.825204 | 4.205141  | H | 0.044823  | -7.624304 | -0.751773 |

### TS3b

SCF energy in Ethanol: -3455.874509 a.u.

Free energy in Ethanol: -3454.695326 a.u.

|   |           |           |           |   |           |           |           |
|---|-----------|-----------|-----------|---|-----------|-----------|-----------|
| P | -0.161881 | 0.177788  | -0.789079 | H | 2.299430  | -4.201172 | 1.589639  |
| N | -0.594016 | -0.172316 | -2.370869 | C | 0.154108  | 4.310487  | 0.021873  |
| C | -1.439068 | -1.353531 | -2.590337 | C | -0.743949 | 4.738240  | 1.026279  |
| H | -2.099543 | -1.168269 | -3.444428 | C | 0.027289  | 4.838115  | -1.287148 |
| H | -0.834943 | -2.246331 | -2.795258 | C | -1.762220 | 5.641825  | 0.696798  |
| H | -2.068469 | -1.545426 | -1.720423 | C | -1.000939 | 5.742630  | -1.565688 |
| C | 0.098821  | 0.292296  | -3.572767 | C | -1.915690 | 6.153023  | -0.591956 |
| H | 0.765736  | 1.118549  | -3.334188 | H | -2.452146 | 5.956320  | 1.477945  |
| H | 0.681994  | -0.512806 | -4.034931 | H | -1.080528 | 6.148390  | -2.572669 |
| H | -0.645381 | 0.637507  | -4.302915 | C | 0.999638  | 4.487337  | -2.391491 |
| O | 0.593687  | 1.638955  | -1.125430 | H | 2.038198  | 4.525651  | -2.044648 |
| O | 1.137178  | -0.780380 | -0.330707 | H | 0.823787  | 3.475386  | -2.772333 |
| C | 1.550617  | 2.172091  | -0.266059 | H | 0.896219  | 5.183209  | -3.230023 |
| C | 2.765783  | 1.489308  | -0.104702 | C | -0.641816 | 4.285849  | 2.468342  |
| C | 1.309578  | 3.416273  | 0.351268  | H | -0.257068 | 3.268748  | 2.563079  |
| C | 3.666877  | 1.909780  | 0.907072  | H | 0.027633  | 4.935319  | 3.047986  |
| C | 3.125950  | 0.355384  | -1.017707 | H | -1.623010 | 4.326751  | 2.953292  |
| C | 2.277678  | 3.856999  | 1.258343  | C | -3.038087 | 7.106566  | -0.929491 |

|    |           |           |           |   |           |           |           |
|----|-----------|-----------|-----------|---|-----------|-----------|-----------|
| H  | -3.905820 | 6.571501  | -1.338757 | C | -0.670652 | 0.338351  | 2.375001  |
| H  | -3.381327 | 7.652244  | -0.044126 | H | -0.016212 | 1.209886  | 2.316058  |
| H  | -2.728342 | 7.840529  | -1.681815 | C | -2.089154 | 0.572478  | 2.707911  |
| C  | 4.326229  | 3.627853  | 2.691894  | H | -2.385339 | 1.617679  | 2.827638  |
| C  | 5.694941  | 2.940067  | 2.721995  | H | -2.435193 | -0.017026 | 3.565577  |
| C  | 5.509500  | 1.424907  | 2.609452  | H | -3.190282 | -0.080512 | 2.011028  |
| C  | 4.883149  | 1.060089  | 1.256491  | B | -4.559914 | -0.685385 | 0.227899  |
| H  | 6.465845  | 0.900183  | 2.721335  | O | -3.474041 | 0.235733  | -0.283853 |
| H  | 6.312079  | 3.294275  | 1.883800  | O | -5.792634 | -0.051803 | -0.137812 |
| H  | 6.227412  | 3.206236  | 3.642855  | C | -4.106860 | 1.337093  | -1.008290 |
| H  | 3.832315  | 3.475863  | 3.663897  | C | -5.570769 | 1.328409  | -0.421023 |
| H  | 4.441719  | 4.714104  | 2.583722  | C | -4.069362 | 0.988001  | -2.502596 |
| H  | 5.654717  | 1.166127  | 0.482006  | H | -4.596202 | 0.050653  | -2.702673 |
| H  | 4.599075  | 0.001575  | 1.243101  | H | -4.521543 | 1.781262  | -3.107911 |
| H  | 4.861958  | 1.080957  | 3.428788  | H | -3.027126 | 0.876551  | -2.812527 |
| H  | 4.272802  | -2.779427 | -2.961134 | C | -3.340537 | 2.633920  | -0.766881 |
| C  | 5.934319  | -0.733832 | -3.411475 | H | -3.868040 | 3.476369  | -1.230043 |
| H  | 6.744556  | -1.200295 | -2.829645 | H | -3.225292 | 2.852440  | 0.296352  |
| H  | 5.777952  | -1.385955 | -4.279804 | H | -2.343109 | 2.587857  | -1.213977 |
| C  | 4.973681  | 1.763267  | -2.097713 | C | -5.707490 | 2.154545  | 0.873865  |
| C  | 6.391568  | 0.657449  | -3.862003 | H | -6.686835 | 1.944179  | 1.316233  |
| H  | 5.713651  | 1.040247  | -4.638090 | H | -4.945679 | 1.883715  | 1.607904  |
| H  | 7.388568  | 0.594721  | -4.314656 | H | -5.644470 | 3.231243  | 0.678686  |
| C  | 6.388974  | 1.618451  | -2.670499 | C | -6.648010 | 1.786619  | -1.411014 |
| H  | 4.362744  | 2.332171  | -2.816705 | H | -6.475953 | 2.817073  | -1.744842 |
| H  | 4.992847  | 2.375726  | -1.194060 | H | -6.689712 | 1.134587  | -2.286537 |
| H  | 7.068374  | 1.236550  | -1.894422 | H | -7.626864 | 1.749979  | -0.920815 |
| H  | 6.767402  | 2.605597  | -2.962664 | C | -4.456284 | -2.217754 | -0.267793 |
| Ni | -1.704865 | 0.203635  | 0.748433  | C | -5.416555 | -2.759303 | -1.139646 |
| C  | 3.320765  | -4.063441 | 5.416553  | C | -3.400396 | -3.063938 | 0.119547  |
| C  | 3.985950  | -2.895465 | 5.041451  | C | -5.328041 | -4.073078 | -1.607268 |
| C  | 3.298906  | -1.881404 | 4.375926  | H | -6.248695 | -2.131284 | -1.447280 |
| C  | 1.931362  | -2.001170 | 4.062384  | C | -3.296162 | -4.377965 | -0.343461 |
| C  | 1.276393  | -3.187386 | 4.453404  | H | -2.637017 | -2.687737 | 0.801388  |
| C  | 1.960971  | -4.200856 | 5.117683  | C | -4.265030 | -4.887835 | -1.211054 |
| H  | 3.851135  | -4.856283 | 5.936910  | H | -6.090214 | -4.463360 | -2.278602 |
| H  | 5.042079  | -2.771922 | 5.267685  | H | -2.461010 | -4.999435 | -0.028452 |
| H  | 3.826173  | -0.974452 | 4.088457  | H | -4.194657 | -5.911711 | -1.571636 |
| H  | 0.219756  | -3.317481 | 4.238103  | O | -4.284872 | -0.597912 | 1.762299  |
| H  | 1.430070  | -5.104004 | 5.408382  | C | -4.880619 | -1.466981 | 2.731578  |
| C  | 1.262628  | -0.894754 | 3.369147  | H | -4.924907 | -2.479290 | 2.316478  |
| H  | 1.888208  | -0.019877 | 3.188226  | H | -4.206737 | -1.489004 | 3.597745  |
| C  | -0.024097 | -0.839225 | 2.963144  | C | -6.267932 | -0.985784 | 3.139102  |
| H  | -0.673962 | -1.699438 | 3.129578  | H | -6.926611 | -0.943713 | 2.267294  |

|                                           |           |           |           |   |           |           |           |
|-------------------------------------------|-----------|-----------|-----------|---|-----------|-----------|-----------|
| H                                         | -6.701012 | -1.672165 | 3.877126  | H | 6.678273  | -3.141735 | 3.673148  |
| H                                         | -6.220028 | 0.014723  | 3.582327  | H | 5.324175  | -4.263884 | 3.536905  |
| <b>TS3a'</b>                              |           |           |           | H | 6.703836  | -4.416419 | 2.442241  |
| SCF energy in Ethanol: -2812.645876 a.u.  |           |           |           | C | 3.597972  | 0.607333  | 2.051165  |
| Free energy in Ethanol: -2811.726117 a.u. |           |           |           | H | 3.955983  | 1.457875  | 1.458871  |
| P                                         | -0.016958 | -1.553787 | -0.073371 | H | 2.504468  | 0.625282  | 2.012510  |
| N                                         | 0.603715  | -2.880015 | -0.889871 | H | 3.906349  | 0.766706  | 3.089625  |
| C                                         | 1.050919  | -4.034781 | -0.114425 | C | -3.535812 | -0.164887 | -1.423056 |
| H                                         | 0.631679  | -4.956368 | -0.538248 | C | -4.388509 | -0.528537 | -0.360601 |
| H                                         | 2.146889  | -4.109712 | -0.109168 | C | -3.746443 | -0.713573 | -2.708050 |
| H                                         | 0.707760  | -3.948476 | 0.921160  | C | -5.426272 | -1.436506 | -0.598496 |
| C                                         | 0.884078  | -2.969191 | -2.321037 | C | -4.799745 | -1.611324 | -2.902236 |
| H                                         | 0.603052  | -2.044644 | -2.822095 | C | -5.649879 | -1.991845 | -1.859607 |
| H                                         | 1.948524  | -3.164518 | -2.497921 | H | -6.071152 | -1.721284 | 0.230243  |
| H                                         | 0.305520  | -3.794306 | -2.759367 | H | -4.962496 | -2.021090 | -3.897658 |
| O                                         | -0.713204 | -0.819863 | -1.399915 | C | -2.868156 | -0.338523 | -3.881306 |
| O                                         | 1.206482  | -0.459724 | 0.279617  | H | -2.759006 | 0.747935  | -3.977040 |
| C                                         | -1.086424 | 0.520623  | -1.277562 | H | -1.859148 | -0.754438 | -3.773087 |
| C                                         | -0.077209 | 1.491488  | -1.259150 | H | -3.287538 | -0.721081 | -4.817382 |
| C                                         | -2.450246 | 0.846083  | -1.220817 | C | -4.211712 | 0.037253  | 1.030865  |
| C                                         | -0.420281 | 2.832543  | -0.953244 | H | -3.160730 | 0.022086  | 1.338277  |
| C                                         | 1.339289  | 1.091825  | -1.542506 | H | -4.549314 | 1.080003  | 1.096105  |
| C                                         | -2.757683 | 2.193823  | -1.018939 | H | -4.783540 | -0.546982 | 1.757838  |
| C                                         | -1.778250 | 3.177135  | -0.831722 | C | -6.759706 | -2.992687 | -2.086334 |
| C                                         | 1.968529  | 0.160001  | -0.702430 | H | -6.403328 | -4.021686 | -1.942152 |
| C                                         | 2.060307  | 1.632137  | -2.635671 | H | -7.589123 | -2.836949 | -1.387951 |
| H                                         | -3.805955 | 2.482631  | -0.981269 | H | -7.157175 | -2.927577 | -3.105408 |
| C                                         | 3.343691  | -0.125496 | -0.792503 | C | -2.224267 | 4.584596  | -0.468112 |
| C                                         | 3.434452  | 1.353921  | -2.752684 | C | -1.121443 | 5.636325  | -0.622577 |
| C                                         | 4.048442  | 0.518421  | -1.813989 | C | 0.169584  | 5.122308  | 0.019368  |
| C                                         | 4.047793  | -1.044566 | 0.156909  | C | 0.669169  | 3.871745  | -0.716965 |
| C                                         | 4.666483  | -2.227330 | -0.302796 | H | 0.951830  | 5.891050  | -0.001757 |
| C                                         | 4.148597  | -0.699225 | 1.527301  | H | -0.944543 | 5.843608  | -1.688128 |
| C                                         | 5.310925  | -3.067134 | 0.617248  | H | -1.440567 | 6.580169  | -0.164354 |
| C                                         | 4.808748  | -1.561281 | 2.405161  | H | -2.558192 | 4.579832  | 0.580278  |
| C                                         | 5.384947  | -2.762148 | 1.975616  | H | -3.104733 | 4.853781  | -1.066239 |
| H                                         | 5.774053  | -3.982583 | 0.252762  | H | 1.103787  | 4.187036  | -1.675871 |
| H                                         | 4.885285  | -1.281418 | 3.454414  | H | 1.492091  | 3.409720  | -0.159733 |
| C                                         | 4.702825  | -2.620837 | -1.765410 | H | -0.017170 | 4.886942  | 1.075194  |
| H                                         | 5.627444  | -2.272393 | -2.245523 | H | 5.118107  | 0.337832  | -1.894501 |
| H                                         | 4.680110  | -3.710693 | -1.876059 | C | 4.290431  | 1.973759  | -3.848235 |
| H                                         | 3.873073  | -2.196438 | -2.333387 | H | 4.834979  | 2.831598  | -3.423838 |
| C                                         | 6.060701  | -3.693627 | 2.955043  | H | 5.060817  | 1.257710  | -4.161042 |
|                                           |           |           |           | C | 1.342340  | 2.397091  | -3.740609 |

|                                           |           |           |           |   |           |           |           |
|-------------------------------------------|-----------|-----------|-----------|---|-----------|-----------|-----------|
| C                                         | 3.484632  | 2.455043  | -5.059682 | C | 0.202349  | -1.739434 | -3.455827 |
| H                                         | 3.138306  | 1.590783  | -5.644035 | H | -0.411480 | -1.933308 | -4.344348 |
| H                                         | 4.126227  | 3.048899  | -5.721966 | H | 1.236159  | -1.547511 | -3.774070 |
| C                                         | 2.271988  | 3.266565  | -4.595355 | H | 0.169281  | -2.636193 | -2.833145 |
| H                                         | 0.861687  | 1.652506  | -4.395019 | C | -0.652140 | 0.565847  | -3.569665 |
| H                                         | 0.521874  | 2.994302  | -3.338646 | H | -0.949282 | 1.416700  | -2.958684 |
| H                                         | 2.614276  | 4.133399  | -4.011483 | H | 0.221261  | 0.846143  | -4.169527 |
| H                                         | 1.715918  | 3.663396  | -5.453412 | H | -1.475575 | 0.322014  | -4.255498 |
| Ni                                        | -1.128044 | -2.068989 | 1.692410  | O | -1.665041 | 0.490005  | -0.913662 |
| C                                         | -1.160797 | 5.378987  | 4.133520  | O | 0.821709  | 0.156818  | -0.344245 |
| C                                         | 0.162553  | 4.958164  | 4.277668  | C | -1.861662 | 1.149233  | 0.295614  |
| C                                         | 0.495848  | 3.617078  | 4.091482  | C | -0.909445 | 2.092353  | 0.705403  |
| C                                         | -0.479079 | 2.655622  | 3.758973  | C | -3.031035 | 0.891280  | 1.032831  |
| C                                         | -1.808601 | 3.102583  | 3.607069  | C | -1.013389 | 2.659077  | 2.001602  |
| C                                         | -2.142706 | 4.440868  | 3.795588  | C | 0.211107  | 2.472038  | -0.214956 |
| H                                         | -1.425802 | 6.422497  | 4.280262  | C | -3.155082 | 1.557251  | 2.254885  |
| H                                         | 0.937774  | 5.674340  | 4.538282  | C | -2.157620 | 2.391104  | 2.772627  |
| H                                         | 1.528864  | 3.297877  | 4.211175  | C | 1.110372  | 1.483606  | -0.644025 |
| H                                         | -2.587409 | 2.397109  | 3.333173  | C | 0.394072  | 3.807688  | -0.652135 |
| H                                         | -3.176831 | 4.756012  | 3.678962  | H | -4.057967 | 1.396837  | 2.839810  |
| C                                         | -0.072142 | 1.257789  | 3.598395  | C | 2.300903  | 1.794738  | -1.327312 |
| H                                         | 1.001977  | 1.081820  | 3.643735  | C | 1.563674  | 4.139736  | -1.359342 |
| C                                         | -0.882092 | 0.187087  | 3.433554  | C | 2.503631  | 3.142169  | -1.639787 |
| H                                         | -1.961997 | 0.337777  | 3.430249  | C | 3.330173  | 0.764825  | -1.673202 |
| C                                         | -0.444560 | -1.198028 | 3.277537  | C | 3.684022  | 0.505307  | -3.015175 |
| H                                         | 0.622077  | -1.366166 | 3.433342  | C | 4.006612  | 0.081221  | -0.632450 |
| C                                         | -1.372831 | -2.287459 | 3.683876  | C | 4.649875  | -0.472508 | -3.291719 |
| H                                         | -0.890469 | -3.132016 | 4.182802  | C | 4.969217  | -0.877413 | -0.955808 |
| H                                         | -2.261589 | -1.949143 | 4.226285  | C | 5.295235  | -1.184463 | -2.281468 |
| C                                         | -2.677296 | -4.835281 | -0.408125 | H | 4.906340  | -0.673287 | -4.330813 |
| H                                         | -1.873060 | -4.288191 | -0.912509 | H | 5.479403  | -1.395493 | -0.146290 |
| H                                         | -2.626387 | -5.891620 | -0.705351 | C | 3.096772  | 1.265121  | -4.187235 |
| H                                         | -3.629030 | -4.419252 | -0.755209 | H | 3.771461  | 2.068490  | -4.513938 |
| C                                         | -2.559776 | -4.685258 | 1.107929  | H | 2.953245  | 0.603175  | -5.048819 |
| H                                         | -3.367465 | -5.262129 | 1.590467  | H | 2.140690  | 1.732498  | -3.946911 |
| H                                         | -1.610283 | -5.137180 | 1.448745  | C | 6.310624  | -2.256486 | -2.603194 |
| O                                         | -2.667493 | -3.334780 | 1.499780  | H | 7.154397  | -2.232092 | -1.904110 |
| H                                         | -2.075682 | -2.970632 | 2.705847  | H | 5.866537  | -3.258928 | -2.536660 |
|                                           |           |           |           | H | 6.707729  | -2.142305 | -3.617485 |
|                                           |           |           |           | C | 3.740486  | 0.392066  | 0.822693  |
|                                           |           |           |           | H | 3.711165  | 1.473228  | 1.001609  |
|                                           |           |           |           | H | 2.780905  | -0.023121 | 1.148010  |
|                                           |           |           |           | H | 4.518643  | -0.038683 | 1.458422  |
|                                           |           |           |           | C | -4.123006 | -0.012853 | 0.552932  |
| <b>TS3b'</b>                              |           |           |           |   |           |           |           |
| SCF energy in Ethanol: -2812.642370 a.u.  |           |           |           |   |           |           |           |
| Free energy in Ethanol: -2811.722856 a.u. |           |           |           |   |           |           |           |
| P                                         | -0.454606 | -0.656554 | -1.065137 |   |           |           |           |
| N                                         | -0.351026 | -0.592697 | -2.730779 |   |           |           |           |

|   |           |           |           |                                           |           |           |           |
|---|-----------|-----------|-----------|-------------------------------------------|-----------|-----------|-----------|
| C | -4.461778 | -1.175379 | 1.280593  | Ni                                        | -0.793726 | -2.624249 | -0.270455 |
| C | -4.877753 | 0.333749  | -0.592643 | C                                         | 6.138746  | -2.753236 | 3.617539  |
| C | -5.519042 | -1.978461 | 0.834541  | C                                         | 5.283775  | -1.973701 | 4.398567  |
| C | -5.929098 | -0.494240 | -0.995434 | C                                         | 3.930134  | -1.882280 | 4.078316  |
| C | -6.263219 | -1.661836 | -0.303202 | C                                         | 3.388030  | -2.563716 | 2.970765  |
| H | -5.767428 | -2.875530 | 1.399233  | C                                         | 4.268739  | -3.342677 | 2.191466  |
| H | -6.508883 | -0.212960 | -1.872710 | C                                         | 5.620172  | -3.436903 | 2.512433  |
| C | -4.598278 | 1.596934  | -1.375966 | H                                         | 7.194502  | -2.827725 | 3.863460  |
| H | -4.489686 | 2.465676  | -0.716718 | H                                         | 5.670684  | -1.435380 | 5.260192  |
| H | -3.670311 | 1.511068  | -1.952094 | H                                         | 3.271806  | -1.273339 | 4.694146  |
| H | -5.412356 | 1.804077  | -2.077906 | H                                         | 3.893839  | -3.872315 | 1.320663  |
| C | -3.736644 | -1.580489 | 2.546943  | H                                         | 6.275339  | -4.047119 | 1.895446  |
| H | -2.675894 | -1.320776 | 2.515957  | C                                         | 1.956334  | -2.434678 | 2.689472  |
| H | -4.160638 | -1.087329 | 3.431700  | H                                         | 1.421594  | -1.735729 | 3.334134  |
| H | -3.821818 | -2.660065 | 2.710512  | C                                         | 1.240541  | -3.101265 | 1.755180  |
| C | -7.379742 | -2.560219 | -0.782479 | H                                         | 1.742611  | -3.830127 | 1.117719  |
| H | -7.010334 | -3.303902 | -1.501605 | C                                         | -0.196792 | -2.957490 | 1.541805  |
| H | -7.836526 | -3.110782 | 0.047030  | H                                         | -0.695469 | -2.321773 | 2.274880  |
| H | -8.167540 | -1.987948 | -1.284593 | C                                         | -0.974843 | -4.126016 | 1.042658  |
| C | -2.342721 | 2.955036  | 4.173891  | H                                         | -1.931102 | -4.281254 | 1.548967  |
| C | -1.352383 | 4.070331  | 4.524301  | H                                         | -0.400372 | -5.054118 | 0.961804  |
| C | 0.057358  | 3.659552  | 4.091837  | C                                         | -3.521939 | -4.768579 | -2.807677 |
| C | 0.119712  | 3.507453  | 2.566486  | H                                         | -2.913367 | -4.885333 | -3.711456 |
| H | 0.800656  | 4.398008  | 4.415475  | H                                         | -3.477503 | -5.709729 | -2.247314 |
| H | -1.633749 | 4.999329  | 4.007996  | H                                         | -4.562878 | -4.593513 | -3.110235 |
| H | -1.392326 | 4.280770  | 5.599747  | C                                         | -2.997992 | -3.611879 | -1.958429 |
| H | -2.223514 | 2.135844  | 4.899349  | H                                         | -3.085229 | -2.667737 | -2.520557 |
| H | -3.376393 | 3.306317  | 4.289804  | H                                         | -3.628823 | -3.498880 | -1.061440 |
| H | 0.102478  | 4.511646  | 2.121048  | O                                         | -1.643356 | -3.838377 | -1.608602 |
| H | 1.079308  | 3.070857  | 2.267227  | H                                         | -1.433552 | -4.139857 | -0.274187 |
| H | 0.323353  | 2.708703  | 4.574883  |                                           |           |           |           |
| H | 3.425263  | 3.419136  | -2.146811 | <b>IM5a</b>                               |           |           |           |
| C | 1.866673  | 5.568094  | -1.789298 | SCF energy in Ethanol: -3455.910521 a.u.  |           |           |           |
| H | 2.573306  | 6.008458  | -1.068667 | Free energy in Ethanol: -3454.723946 a.u. |           |           |           |
| H | 2.392202  | 5.557009  | -2.752374 | P                                         | 0.002145  | 0.729310  | -0.597692 |
| C | -0.709840 | 4.844114  | -0.477252 | N                                         | 0.416905  | 1.752706  | -1.846714 |
| C | 0.625121  | 6.462451  | -1.868626 | C                                         | 1.523373  | 2.698149  | -1.654995 |
| H | 0.024546  | 6.190376  | -2.748296 | H                                         | 2.091123  | 2.778395  | -2.588612 |
| H | 0.926786  | 7.508383  | -2.002347 | H                                         | 1.148177  | 3.690898  | -1.376215 |
| C | -0.224653 | 6.292896  | -0.606237 | H                                         | 2.211240  | 2.344252  | -0.887967 |
| H | -1.462300 | 4.657007  | -1.259857 | C                                         | -0.404450 | 2.037988  | -3.023813 |
| H | -1.240784 | 4.702341  | 0.466070  | H                                         | -1.238578 | 1.342637  | -3.089718 |
| H | 0.374182  | 6.565823  | 0.274957  | H                                         | -0.795897 | 3.061836  | -2.991252 |
| H | -1.088654 | 6.968399  | -0.622494 | H                                         | 0.212950  | 1.934819  | -3.925907 |



|   |           |           |           |    |           |           |           |
|---|-----------|-----------|-----------|----|-----------|-----------|-----------|
| O | -1.032304 | -0.244943 | -1.475326 | H  | -3.282940 | -2.035941 | -3.473567 |
| O | -1.051116 | 1.494412  | 0.452175  | H  | -1.928208 | -0.943310 | -3.758094 |
| C | -2.063128 | -0.970179 | -0.875077 | H  | -2.386681 | -2.116908 | -5.000031 |
| C | -3.103465 | -0.274842 | -0.240128 | C  | -0.121332 | -4.369724 | 0.046952  |
| C | -2.078842 | -2.371858 | -1.005589 | H  | -0.002644 | -3.430918 | 0.594809  |
| C | -4.035244 | -0.997802 | 0.548465  | H  | -0.970909 | -4.891938 | 0.502984  |
| C | -3.255664 | 1.205806  | -0.420449 | H  | 0.768156  | -4.980901 | 0.228207  |
| C | -3.079752 | -3.048334 | -0.302915 | C  | 1.042112  | -5.667986 | -4.678110 |
| C | -4.008289 | -2.402279 | 0.520109  | H  | 1.957227  | -6.058737 | -4.220607 |
| C | -2.244203 | 2.065655  | 0.025374  | H  | 0.437556  | -6.532083 | -4.985700 |
| C | -4.417699 | 1.759704  | -1.014542 | H  | 1.322237  | -5.129642 | -5.590396 |
| H | -3.126243 | -4.130680 | -0.394887 | C  | -4.955121 | -3.252261 | 1.352995  |
| C | -2.413715 | 3.460259  | 0.102674  | C  | -6.131643 | -2.466725 | 1.941786  |
| C | -4.600075 | 3.154052  | -0.979679 | C  | -5.628780 | -1.148203 | 2.535096  |
| C | -3.623867 | 3.961495  | -0.386039 | C  | -5.035770 | -0.261458 | 1.432049  |
| C | -1.394717 | 4.376157  | 0.704869  | H  | -6.439450 | -0.608914 | 3.039619  |
| C | -0.796049 | 5.401372  | -0.060590 | H  | -6.869783 | -2.251310 | 1.155963  |
| C | -1.071777 | 4.259989  | 2.079921  | H  | -6.643423 | -3.072373 | 2.699135  |
| C | 0.154279  | 6.239165  | 0.539257  | H  | -4.381269 | -3.705583 | 2.175499  |
| C | -0.126620 | 5.125350  | 2.635821  | H  | -5.316746 | -4.093005 | 0.746914  |
| C | 0.515034  | 6.112473  | 1.880121  | H  | -5.863662 | 0.128974  | 0.823999  |
| H | 0.620270  | 7.015561  | -0.064941 | H  | -4.553931 | 0.619448  | 1.871186  |
| H | 0.108545  | 5.031289  | 3.694269  | H  | -4.865782 | -1.358028 | 3.298241  |
| C | -1.159290 | 5.670239  | -1.507073 | H  | -3.799545 | 5.032914  | -0.322566 |
| H | -1.942107 | 6.437261  | -1.582176 | C  | -5.858076 | 3.815995  | -1.523819 |
| H | -0.292332 | 6.045277  | -2.061602 | H  | -6.527011 | 4.042916  | -0.679216 |
| H | -1.537292 | 4.782218  | -2.017270 | H  | -5.599233 | 4.785724  | -1.966970 |
| C | 1.568148  | 7.002995  | 2.496816  | C  | -5.397281 | 0.882288  | -1.784982 |
| H | 1.320135  | 7.260076  | 3.532778  | C  | -6.619024 | 2.951992  | -2.535254 |
| H | 2.547256  | 6.505611  | 2.513443  | H  | -6.071042 | 2.922402  | -3.487783 |
| H | 1.685391  | 7.935101  | 1.934152  | H  | -7.597337 | 3.400159  | -2.746489 |
| C | -1.760176 | 3.255611  | 2.977552  | C  | -6.772157 | 1.527346  | -1.996632 |
| H | -2.847970 | 3.277007  | 2.843809  | H  | -4.949951 | 0.680852  | -2.771459 |
| H | -1.426387 | 2.233575  | 2.771475  | H  | -5.504749 | -0.097723 | -1.315910 |
| H | -1.545388 | 3.470549  | 4.028922  | H  | -7.322030 | 1.555113  | -1.044522 |
| C | -1.193841 | -3.151361 | -1.930646 | H  | -7.363317 | 0.910566  | -2.684311 |
| C | -0.316807 | -4.141310 | -1.434558 | Ni | 1.730811  | -0.055763 | 0.518925  |
| C | -1.333741 | -2.983695 | -3.328696 | C  | -0.484233 | -6.116033 | 4.752713  |
| C | 0.404132  | -4.930641 | -2.339322 | C  | -1.635475 | -5.353772 | 4.547047  |
| C | -0.592165 | -3.794820 | -4.192923 | C  | -1.543492 | -4.090510 | 3.964783  |
| C | 0.281189  | -4.779009 | -3.721674 | C  | -0.302615 | -3.548827 | 3.576303  |
| H | 1.081393  | -5.686030 | -1.945499 | C  | 0.847290  | -4.337537 | 3.784903  |
| H | -0.709601 | -3.658649 | -5.266538 | C  | 0.756501  | -5.599226 | 4.366171  |
| C | -2.284643 | -1.966916 | -3.920641 | H  | -0.551150 | -7.102345 | 5.203736  |

|   |           |           |           |                                           |           |           |           |
|---|-----------|-----------|-----------|-------------------------------------------|-----------|-----------|-----------|
| H | -2.607123 | -5.742737 | 4.841285  | H                                         | 6.979401  | 4.839166  | 0.074159  |
| H | -2.443825 | -3.497929 | 3.816137  | O                                         | 3.572158  | -0.313338 | 1.210023  |
| H | 1.819426  | -3.964018 | 3.476100  | C                                         | 4.241535  | -1.066784 | 2.224153  |
| H | 1.658982  | -6.187164 | 4.513792  | H                                         | 3.589914  | -1.075407 | 3.100862  |
| C | -0.265820 | -2.206576 | 2.984612  | H                                         | 4.365692  | -2.102236 | 1.882152  |
| H | -1.239658 | -1.797971 | 2.710676  | C                                         | 5.596001  | -0.487316 | 2.623387  |
| C | 0.823433  | -1.426909 | 2.793691  | H                                         | 6.007647  | -1.086505 | 3.445599  |
| H | 1.790527  | -1.808861 | 3.112672  | H                                         | 6.303226  | -0.512651 | 1.791118  |
| C | 0.779783  | -0.056797 | 2.239678  | H                                         | 5.499340  | 0.548927  | 2.961516  |
| H | -0.263219 | 0.219366  | 2.084116  | H                                         | 1.341903  | 2.009733  | 2.661591  |
| C | 1.446553  | 1.016872  | 3.113480  |                                           |           |           |           |
| H | 0.965872  | 1.055600  | 4.103447  |                                           |           |           |           |
| H | 2.513010  | 0.835541  | 3.270262  | <b>IM5b</b>                               |           |           |           |
| B | 4.293647  | -0.010678 | -0.115626 | SCF energy in Ethanol: -3455.907681 a.u.  |           |           |           |
| O | 3.061484  | 0.007129  | -1.023156 | Free energy in Ethanol: -3454.723037 a.u. |           |           |           |
| O | 5.104482  | -1.087451 | -0.617664 | P                                         | 0.173802  | 0.316379  | -0.660351 |
| C | 3.348182  | -0.853036 | -2.163828 | N                                         | -0.060549 | 0.185900  | -2.309426 |
| C | 4.378029  | -1.878143 | -1.558485 | C                                         | -1.174486 | -0.643665 | -2.790470 |
| C | 3.970130  | 0.042440  | -3.248623 | H                                         | -1.564364 | -0.209968 | -3.717656 |
| H | 4.902228  | 0.499097  | -2.908235 | H                                         | -0.853645 | -1.672180 | -2.984391 |
| H | 4.167421  | -0.522122 | -4.166548 | H                                         | -1.989975 | -0.652808 | -2.069367 |
| H | 3.267240  | 0.846215  | -3.489212 | C                                         | 0.947095  | 0.483707  | -3.329022 |
| C | 2.066032  | -1.476485 | -2.700579 | H                                         | 1.710606  | 1.146252  | -2.925780 |
| H | 2.296565  | -2.186176 | -3.502916 | H                                         | 1.433665  | -0.426723 | -3.701008 |
| H | 1.508832  | -2.013089 | -1.931657 | H                                         | 0.454898  | 0.984050  | -4.172588 |
| H | 1.412281  | -0.704474 | -3.116893 | O                                         | 1.316936  | 1.532501  | -0.699306 |
| C | 3.695993  | -3.050339 | -0.828348 | O                                         | 1.065451  | -0.993774 | -0.114297 |
| H | 4.460005  | -3.605026 | -0.272881 | C                                         | 2.402520  | 1.629938  | 0.170041  |
| H | 2.945271  | -2.699946 | -0.113510 | C                                         | 3.347909  | 0.594520  | 0.203206  |
| H | 3.208495  | -3.741455 | -1.524652 | C                                         | 2.566476  | 2.807918  | 0.926503  |
| C | 5.375049  | -2.442362 | -2.577253 | C                                         | 4.360041  | 0.608592  | 1.197383  |
| H | 4.863744  | -2.990827 | -3.377686 | C                                         | 3.310013  | -0.520276 | -0.797395 |
| H | 5.980105  | -1.650050 | -3.024316 | C                                         | 3.651567  | 2.835292  | 1.807029  |
| H | 6.055197  | -3.137125 | -2.072730 | C                                         | 4.510021  | 1.749382  | 2.002224  |
| C | 5.081552  | 1.399852  | -0.025147 | C                                         | 2.203547  | -1.379082 | -0.831354 |
| C | 6.302399  | 1.588855  | -0.696022 | C                                         | 4.396921  | -0.751305 | -1.677816 |
| C | 4.581473  | 2.498948  | 0.697820  | H                                         | 3.816874  | 3.740783  | 2.385359  |
| C | 6.983422  | 2.808639  | -0.664879 | C                                         | 2.221706  | -2.598124 | -1.539010 |
| H | 6.730121  | 0.750019  | -1.239915 | C                                         | 4.415603  | -1.933847 | -2.436966 |
| C | 5.247556  | 3.726718  | 0.732138  | C                                         | 3.362791  | -2.845986 | -2.308463 |
| H | 3.657983  | 2.387786  | 1.263133  | C                                         | 1.137959  | -3.625963 | -1.449905 |
| C | 6.454134  | 3.887137  | 0.046762  | C                                         | 0.430784  | -4.057195 | -2.594163 |
| H | 7.929092  | 2.916944  | -1.192255 | C                                         | 0.877895  | -4.243252 | -0.201665 |
| H | 4.830495  | 4.555761  | 1.300945  | C                                         | -0.582760 | -5.014677 | -2.448613 |
|   |           |           |           | C                                         | -0.136076 | -5.198098 | -0.105558 |

|   |           |           |           |    |           |           |           |
|---|-----------|-----------|-----------|----|-----------|-----------|-----------|
| C | -0.897802 | -5.582453 | -1.214619 | H  | 6.023599  | -0.651742 | 0.621192  |
| H | -1.136695 | -5.325341 | -3.332700 | H  | 4.661912  | -1.520046 | 1.287197  |
| H | -0.333163 | -5.655911 | 0.861179  | H  | 5.239913  | -0.808018 | 3.568304  |
| C | 0.746898  | -3.576290 | -3.996673 | H  | 3.419415  | -3.787343 | -2.849807 |
| H | 1.484632  | -4.231391 | -4.479878 | C  | 5.579454  | -2.288877 | -3.350822 |
| H | -0.150852 | -3.591920 | -4.623882 | H  | 6.221256  | -3.017610 | -2.832000 |
| H | 1.159551  | -2.565830 | -4.016651 | H  | 5.201161  | -2.806601 | -4.241102 |
| C | -2.023307 | -6.580654 | -1.074963 | C  | 5.470293  | 0.309472  | -1.890781 |
| H | -2.272456 | -7.042733 | -2.036074 | C  | 6.432343  | -1.081931 | -3.755965 |
| H | -1.766308 | -7.378802 | -0.369461 | H  | 5.886800  | -0.467122 | -4.485909 |
| H | -2.935020 | -6.099325 | -0.696139 | H  | 7.348962  | -1.423122 | -4.251860 |
| C | 1.728000  | -3.945408 | 1.012555  | C  | 6.757529  | -0.232905 | -2.524062 |
| H | 2.792019  | -4.106543 | 0.797756  | H  | 5.048504  | 1.075852  | -2.560468 |
| H | 1.612194  | -2.910180 | 1.344264  | H  | 5.695465  | 0.835987  | -0.961082 |
| H | 1.447151  | -4.594546 | 1.846189  | H  | 7.302883  | -0.847144 | -1.792749 |
| C | 1.698529  | 4.020856  | 0.801746  | H  | 7.416247  | 0.603338  | -2.787729 |
| C | 1.004770  | 4.523226  | 1.927353  | Ni | -1.678454 | 0.618950  | 0.458585  |
| C | 1.656261  | 4.742577  | -0.415588 | C  | -1.772786 | -6.052903 | 4.539773  |
| C | 0.237393  | 5.687519  | 1.794557  | C  | -0.520003 | -5.526401 | 4.860360  |
| C | 0.894851  | 5.911996  | -0.492629 | C  | -0.139273 | -4.276871 | 4.372082  |
| C | 0.161003  | 6.395372  | 0.594372  | C  | -0.998482 | -3.515928 | 3.555903  |
| H | -0.304982 | 6.055801  | 2.663448  | C  | -2.252796 | -4.070271 | 3.231256  |
| H | 0.880702  | 6.464737  | -1.430263 | C  | -2.635028 | -5.316804 | 3.720849  |
| C | 2.445682  | 4.310298  | -1.631002 | H  | -2.072309 | -7.027098 | 4.916663  |
| H | 3.464540  | 4.006502  | -1.366399 | H  | 0.162547  | -6.088530 | 5.492880  |
| H | 1.972696  | 3.457649  | -2.130424 | H  | 0.835794  | -3.870823 | 4.632827  |
| H | 2.512782  | 5.127347  | -2.356287 | H  | -2.925337 | -3.526993 | 2.573729  |
| C | 1.092898  | 3.884651  | 3.298633  | H  | -3.608312 | -5.721402 | 3.454339  |
| H | 1.234419  | 2.803046  | 3.251776  | C  | -0.560143 | -2.197075 | 3.080272  |
| H | 1.935340  | 4.295217  | 3.871496  | H  | 0.509944  | -2.005495 | 3.159111  |
| H | 0.185760  | 4.086569  | 3.876841  | C  | -1.351373 | -1.207844 | 2.615760  |
| C | -0.693034 | 7.635433  | 0.469324  | H  | -2.425691 | -1.375992 | 2.608980  |
| H | -1.698627 | 7.389276  | 0.102189  | C  | -0.879710 | 0.125504  | 2.172085  |
| H | -0.815066 | 8.138361  | 1.434546  | H  | 0.215074  | 0.120557  | 2.126577  |
| H | -0.258212 | 8.352897  | -0.235429 | C  | -1.330129 | 1.283328  | 3.082588  |
| C | 5.563468  | 1.842744  | 3.095721  | H  | -1.084035 | 2.258662  | 2.649246  |
| C | 6.632597  | 0.748366  | 3.014488  | H  | -0.818289 | 1.216876  | 4.054870  |
| C | 5.964757  | -0.606445 | 2.766916  | H  | -2.404256 | 1.271042  | 3.278050  |
| C | 5.256133  | -0.606973 | 1.406100  | B  | -4.146897 | 1.016063  | -0.410580 |
| H | 6.700312  | -1.419266 | 2.793941  | O  | -2.810411 | 1.369473  | -1.051293 |
| H | 7.330066  | 0.964418  | 2.192521  | O  | -4.938166 | 2.212682  | -0.526108 |
| H | 7.224826  | 0.735853  | 3.937210  | C  | -2.928066 | 2.696132  | -1.644422 |
| H | 5.059754  | 1.773840  | 4.071921  | C  | -4.111840 | 3.335854  | -0.821774 |
| H | 6.026204  | 2.837926  | 3.069806  | C  | -3.289196 | 2.484545  | -3.123208 |

|                                           |           |           |           |   |           |           |           |
|-------------------------------------------|-----------|-----------|-----------|---|-----------|-----------|-----------|
| H                                         | -4.229904 | 1.936883  | -3.224790 | C | 1.328847  | 2.502264  | 2.628708  |
| H                                         | -3.375737 | 3.437963  | -3.655459 | H | 1.982058  | 1.648999  | 2.801675  |
| H                                         | -2.499804 | 1.899785  | -3.604884 | H | 1.944133  | 3.387215  | 2.427698  |
| C                                         | -1.604242 | 3.444730  | -1.538350 | H | 0.746666  | 2.690527  | 3.541600  |
| H                                         | -1.715815 | 4.468583  | -1.913836 | O | 1.115031  | -0.155739 | 1.654032  |
| H                                         | -1.241806 | 3.501369  | -0.510026 | O | 1.643434  | 0.993922  | -0.601739 |
| H                                         | -0.838695 | 2.947801  | -2.140972 | C | 1.799599  | -1.297979 | 1.236498  |
| C                                         | -3.646157 | 4.001906  | 0.487677  | C | 3.016579  | -1.143180 | 0.557051  |
| H                                         | -4.530994 | 4.252127  | 1.082255  | C | 1.285701  | -2.565004 | 1.566900  |
| H                                         | -3.023654 | 3.331276  | 1.083968  | C | 3.633292  | -2.280526 | -0.024578 |
| H                                         | -3.086060 | 4.925704  | 0.301593  | C | 3.650606  | 0.209477  | 0.434828  |
| C                                         | -4.949962 | 4.345569  | -1.615642 | C | 1.986171  | -3.669289 | 1.074514  |
| H                                         | -4.341513 | 5.190609  | -1.960541 | C | 3.106197  | -3.554980 | 0.244848  |
| H                                         | -5.425690 | 3.878090  | -2.480876 | C | 2.965577  | 1.227007  | -0.244085 |
| H                                         | -5.743307 | 4.741403  | -0.972431 | C | 4.939110  | 0.477195  | 0.959495  |
| C                                         | -4.877693 | -0.283332 | -1.038644 | H | 1.624542  | -4.662313 | 1.330308  |
| C                                         | -6.057799 | -0.154401 | -1.791167 | C | 3.579911  | 2.439991  | -0.606264 |
| C                                         | -4.354109 | -1.583021 | -0.899146 | C | 5.565629  | 1.695201  | 0.638544  |
| C                                         | -6.678705 | -1.256669 | -2.384639 | C | 4.895468  | 2.621027  | -0.168276 |
| H                                         | -6.493351 | 0.835135  | -1.903938 | C | 2.902964  | 3.479238  | -1.443986 |
| C                                         | -4.960305 | -2.693245 | -1.492240 | C | 2.687922  | 4.784473  | -0.948985 |
| H                                         | -3.451323 | -1.733839 | -0.307280 | C | 2.526447  | 3.173168  | -2.776070 |
| C                                         | -6.128701 | -2.532123 | -2.240653 | C | 2.049909  | 5.730851  | -1.763061 |
| H                                         | -7.592945 | -1.121444 | -2.959052 | C | 1.905849  | 4.153331  | -3.553253 |
| H                                         | -4.523477 | -3.682262 | -1.368218 | C | 1.640353  | 5.436257  | -3.062527 |
| H                                         | -6.607667 | -3.392474 | -2.702644 | H | 1.876197  | 6.729166  | -1.364997 |
| O                                         | -3.607563 | 0.731082  | 1.001394  | H | 1.625987  | 3.908213  | -4.576026 |
| C                                         | -4.511363 | 0.248988  | 2.000330  | C | 3.149773  | 5.234681  | 0.422280  |
| H                                         | -5.096158 | -0.577812 | 1.578602  | H | 4.128017  | 5.731605  | 0.366479  |
| H                                         | -3.918347 | -0.151652 | 2.825325  | H | 2.449497  | 5.960972  | 0.849513  |
| C                                         | -5.440351 | 1.340432  | 2.527063  | H | 3.256718  | 4.404210  | 1.122115  |
| H                                         | -6.052419 | 1.756122  | 1.723684  | C | 0.928829  | 6.461103  | -3.914724 |
| H                                         | -6.099128 | 0.919071  | 3.297103  | H | 1.312032  | 6.464464  | -4.941804 |
| H                                         | -4.865240 | 2.158324  | 2.975203  | H | -0.147108 | 6.249894  | -3.974082 |
|                                           |           |           |           | H | 1.043664  | 7.471066  | -3.507492 |
| <b>TS4a</b>                               |           |           |           | C | 2.811168  | 1.823341  | -3.396221 |
| SCF energy in Ethanol: -3455.882079 a.u.  |           |           |           | H | 3.828631  | 1.483049  | -3.172794 |
| Free energy in Ethanol: -3454.700799 a.u. |           |           |           | H | 2.121860  | 1.058388  | -3.023833 |
| P                                         | 0.421031  | 0.886552  | 0.538665  | H | 2.701267  | 1.869917  | -4.484122 |
| N                                         | 0.418724  | 2.239155  | 1.515580  | C | 0.096112  | -2.780141 | 2.450460  |
| C                                         | -0.427869 | 3.377411  | 1.148769  | C | -1.060177 | -3.425903 | 1.950439  |
| H                                         | -0.939929 | 3.751820  | 2.043286  | C | 0.162028  | -2.428425 | 3.817134  |
| H                                         | 0.172890  | 4.188081  | 0.715093  | C | -2.128140 | -3.675846 | 2.818920  |
| H                                         | -1.196157 | 3.079002  | 0.433531  | C | -0.931167 | -2.703294 | 4.648287  |

|    |           |           |           |   |           |           |           |
|----|-----------|-----------|-----------|---|-----------|-----------|-----------|
| C  | -2.088865 | -3.320903 | 4.170991  | C | -0.994880 | -3.689924 | -3.361631 |
| H  | -3.014703 | -4.169826 | 2.425230  | C | -2.329242 | -4.016918 | -3.681404 |
| H  | -0.866582 | -2.437735 | 5.701876  | C | -2.654470 | -5.260808 | -4.215523 |
| C  | 1.394385  | -1.787622 | 4.416259  | H | -1.923038 | -7.192060 | -4.856734 |
| H  | 2.306566  | -2.327451 | 4.137732  | H | 0.444029  | -6.657125 | -4.288470 |
| H  | 1.514240  | -0.753729 | 4.073287  | H | 1.024044  | -4.446060 | -3.348106 |
| H  | 1.330035  | -1.773246 | 5.508906  | H | -3.117443 | -3.293853 | -3.495790 |
| C  | -1.176003 | -3.858631 | 0.505422  | H | -3.691661 | -5.486163 | -4.452808 |
| H  | -0.887084 | -3.065801 | -0.190459 | C | -0.589006 | -2.392068 | -2.811918 |
| H  | -0.539378 | -4.722991 | 0.283011  | H | 0.449564  | -2.343548 | -2.478469 |
| H  | -2.204744 | -4.146272 | 0.268978  | C | -1.339003 | -1.272375 | -2.695595 |
| C  | -3.264848 | -3.596284 | 5.079556  | H | -2.366648 | -1.281568 | -3.054606 |
| H  | -4.110544 | -2.934551 | 4.850610  | C | -0.837736 | 0.001406  | -2.134341 |
| H  | -3.625235 | -4.625809 | 4.967739  | H | 0.239163  | -0.106370 | -1.983617 |
| H  | -3.002061 | -3.443930 | 6.131473  | C | -1.071675 | 1.220885  | -3.039962 |
| C  | 3.695202  | -4.823156 | -0.354546 | H | -0.541571 | 1.095669  | -3.997335 |
| C  | 5.074694  | -4.621413 | -0.989937 | H | -2.128946 | 1.368642  | -3.274543 |
| C  | 5.067466  | -3.351172 | -1.843833 | H | -0.695737 | 2.142688  | -2.581139 |
| C  | 4.825663  | -2.120279 | -0.960352 | B | -3.692757 | 1.314486  | 0.704522  |
| H  | 6.015270  | -3.232406 | -2.382448 | O | -3.732289 | 2.579040  | 0.072388  |
| H  | 5.840078  | -4.527073 | -0.206194 | O | -4.882026 | 1.084412  | 1.418185  |
| H  | 5.341648  | -5.500231 | -1.588922 | C | -4.886556 | 3.295891  | 0.557257  |
| H  | 3.001930  | -5.198002 | -1.122926 | C | -5.817250 | 2.144519  | 1.136815  |
| H  | 3.734864  | -5.604571 | 0.415522  | C | -5.494256 | 4.083319  | -0.606447 |
| H  | 5.740353  | -1.929540 | -0.381892 | H | -5.755036 | 3.430171  | -1.442136 |
| H  | 4.680591  | -1.229905 | -1.582198 | H | -6.395085 | 4.623086  | -0.291007 |
| H  | 4.277775  | -3.427615 | -2.604657 | H | -4.768287 | 4.819902  | -0.967634 |
| H  | 5.409426  | 3.537209  | -0.449945 | C | -4.392426 | 4.281856  | 1.630238  |
| C  | 6.978987  | 2.020648  | 1.100295  | H | -5.204397 | 4.903038  | 2.024480  |
| H  | 7.672513  | 1.832067  | 0.266150  | H | -3.917815 | 3.758100  | 2.465427  |
| H  | 7.056105  | 3.094040  | 1.314286  | H | -3.644493 | 4.943361  | 1.180384  |
| C  | 5.592142  | -0.478844 | 1.950518  | C | -6.528723 | 2.501181  | 2.446685  |
| C  | 7.432944  | 1.200259  | 2.312480  | H | -7.105505 | 1.636976  | 2.792643  |
| H  | 6.920156  | 1.556417  | 3.217272  | H | -5.821743 | 2.769612  | 3.235267  |
| H  | 8.507094  | 1.345238  | 2.479579  | H | -7.224734 | 3.336259  | 2.303860  |
| C  | 7.105499  | -0.279633 | 2.096593  | C | -6.859421 | 1.619757  | 0.137454  |
| H  | 5.120956  | -0.308042 | 2.931546  | H | -7.634674 | 2.367422  | -0.065239 |
| H  | 5.366209  | -1.518078 | 1.703613  | H | -6.402315 | 1.320781  | -0.807164 |
| H  | 7.618422  | -0.638003 | 1.192163  | H | -7.340937 | 0.735514  | 0.567807  |
| H  | 7.475720  | -0.887764 | 2.930876  | C | -3.545106 | -0.036666 | -0.832198 |
| Ni | -1.583728 | 0.389773  | -0.339868 | C | -3.858865 | -1.350936 | -0.415197 |
| C  | -1.663579 | -6.221705 | -4.441714 | C | -4.218203 | 0.425908  | -1.984762 |
| C  | -0.338484 | -5.920593 | -4.121695 | C | -4.771863 | -2.156322 | -1.101920 |
| C  | -0.012635 | -4.674519 | -3.588595 | H | -3.384862 | -1.758434 | 0.475589  |

|   |           |           |           |   |           |          |           |
|---|-----------|-----------|-----------|---|-----------|----------|-----------|
| C | -5.129043 | -0.364376 | -2.685241 | C | -1.264196 | 4.753758 | -1.144302 |
| H | -4.042403 | 1.446030  | -2.314849 | C | -1.653554 | 4.245760 | 1.211757  |
| C | -5.406492 | -1.664029 | -2.244099 | C | -0.454362 | 5.827138 | -0.752595 |
| H | -4.989080 | -3.162325 | -0.749858 | C | -0.841132 | 5.330355 | 1.553361  |
| H | -5.631070 | 0.027998  | -3.567231 | C | -0.230065 | 6.137877 | 0.589985  |
| H | -6.121414 | -2.282282 | -2.782299 | H | 0.003209  | 6.444119 | -1.524306 |
| O | -2.465916 | 0.945628  | 1.384198  | H | -0.690365 | 5.557499 | 2.606637  |
| C | -2.506523 | 0.145436  | 2.588513  | C | -1.479832 | 4.526926 | -2.626399 |
| H | -1.597970 | -0.458816 | 2.595858  | H | -2.359333 | 5.069883 | -2.997471 |
| H | -3.370074 | -0.523189 | 2.551310  | H | -0.618204 | 4.884986 | -3.200126 |
| C | -2.569373 | 1.033884  | 3.821790  | H | -1.635767 | 3.472132 | -2.862826 |
| H | -1.718070 | 1.722537  | 3.845015  | C | 0.656695  | 7.293360 | 0.989533  |
| H | -3.495914 | 1.614896  | 3.834782  | H | 0.350973  | 7.716751 | 1.952390  |
| H | -2.535544 | 0.412540  | 4.724817  | H | 1.700571  | 6.969305 | 1.089061  |

#### TS4b

SCF energy in Ethanol: -3455.881086 a.u.

Free energy in Ethanol: -3454.696683 a.u.

|   |           |           |           |   |           |           |           |
|---|-----------|-----------|-----------|---|-----------|-----------|-----------|
| P | -0.506280 | 0.006402  | -0.489084 | H | -2.160305 | 3.943865  | 3.284993  |
| N | -0.301576 | 0.543137  | -2.056977 | C | -1.617977 | -4.003511 | 0.101966  |
| C | 0.915582  | 1.282665  | -2.402362 | C | -0.718196 | -4.556899 | 1.040397  |
| H | 0.682065  | 2.332872  | -2.620828 | C | -1.674271 | -4.530456 | -1.207683 |
| H | 1.641415  | 1.243666  | -1.588060 | C | 0.120729  | -5.604705 | 0.643446  |
| H | 1.382990  | 0.831222  | -3.285661 | C | -0.821319 | -5.583354 | -1.557215 |
| C | -1.267195 | 0.433638  | -3.148062 | C | 0.089653  | -6.132134 | -0.650555 |
| H | -2.139081 | -0.136221 | -2.832733 | H | 0.814222  | -6.023577 | 1.370361  |
| H | -1.595991 | 1.425195  | -3.484173 | H | -0.879767 | -5.992027 | -2.564390 |
| H | -0.799963 | -0.079638 | -4.000027 | C | -2.650018 | -3.997261 | -2.233045 |
| O | -1.593649 | -1.225560 | -0.841735 | H | -3.669700 | -3.949570 | -1.834001 |
| O | -1.495823 | 1.064267  | 0.365791  | H | -2.380147 | -2.982838 | -2.548949 |
| C | -2.596615 | -1.630345 | 0.037542  | H | -2.664005 | -4.633868 | -3.123353 |
| C | -3.632309 | -0.736914 | 0.343676  | C | -0.645475 | -4.055610 | 2.467292  |
| C | -2.591103 | -2.949205 | 0.526385  | H | -0.664272 | -2.962618 | 2.516569  |
| C | -4.578958 | -1.081486 | 1.342677  | H | -1.488419 | -4.417783 | 3.068884  |
| C | -3.729765 | 0.585559  | -0.350747 | H | 0.274186  | -4.396402 | 2.951461  |
| C | -3.605705 | -3.290864 | 1.424115  | C | 1.023483  | -7.248036 | -1.058722 |
| C | -4.562096 | -2.379098 | 1.880249  | H | 0.626555  | -7.810821 | -1.910248 |
| C | -2.692139 | 1.514082  | -0.186378 | H | 2.005913  | -6.856254 | -1.354436 |
| C | -4.868830 | 0.945049  | -1.111507 | H | 1.192086  | -7.951384 | -0.235712 |
| H | -3.634335 | -4.311311 | 1.799296  | C | -5.532856 | -2.826875 | 2.962433  |
| C | -2.841525 | 2.870234  | -0.529049 | C | -6.709574 | -1.867815 | 3.168556  |
| C | -5.010515 | 2.279429  | -1.531599 | C | -6.197219 | -0.426107 | 3.205214  |
| C | -4.030176 | 3.213829  | -1.182663 | C | -5.577408 | -0.049013 | 1.853253  |
| C | -1.869271 | 3.945683  | -0.155881 | H | -7.007024 | 0.274349  | 3.442096  |

|    |           |           |           |                                           |           |           |           |
|----|-----------|-----------|-----------|-------------------------------------------|-----------|-----------|-----------|
| H  | -7.431403 | -1.975465 | 2.346164  | C                                         | 5.268491  | -0.260348 | -1.748901 |
| H  | -7.241970 | -2.123206 | 4.092534  | C                                         | 5.585520  | -1.805427 | -1.549473 |
| H  | -4.980351 | -2.918016 | 3.909966  | C                                         | 6.349645  | 0.687704  | -1.225350 |
| H  | -5.893871 | -3.837417 | 2.730608  | H                                         | 6.545074  | 0.528660  | -0.162596 |
| H  | -6.392245 | 0.082509  | 1.127831  | H                                         | 7.288889  | 0.556629  | -1.776062 |
| H  | -5.085029 | 0.927523  | 1.922113  | H                                         | 6.020626  | 1.724037  | -1.353456 |
| H  | -5.447214 | -0.325581 | 4.002367  | C                                         | 4.928630  | 0.112967  | -3.202300 |
| H  | -4.186916 | 4.257709  | -1.444400 | H                                         | 5.798150  | 0.031674  | -3.864246 |
| C  | -6.234732 | 2.756257  | -2.300165 | H                                         | 4.128182  | -0.518571 | -3.599963 |
| H  | -6.913535 | 3.266527  | -1.599393 | H                                         | 4.578561  | 1.150286  | -3.222798 |
| H  | -5.934367 | 3.517570  | -3.030995 | C                                         | 6.073285  | -2.523418 | -2.812820 |
| C  | -5.867623 | -0.112458 | -1.566077 | H                                         | 6.214115  | -3.587193 | -2.593611 |
| C  | -7.001679 | 1.624209  | -2.991892 | H                                         | 5.355903  | -2.442040 | -3.633011 |
| H  | -6.433065 | 1.265560  | -3.861627 | H                                         | 7.034732  | -2.118660 | -3.150763 |
| H  | -7.959055 | 2.000329  | -3.372159 | C                                         | 6.568378  | -2.100616 | -0.406431 |
| C  | -7.215359 | 0.463974  | -2.015910 | H                                         | 7.581192  | -1.759838 | -0.649555 |
| H  | -5.416181 | -0.648781 | -2.415870 | H                                         | 6.255042  | -1.634864 | 0.528979  |
| H  | -6.015275 | -0.872677 | -0.795539 | H                                         | 6.600202  | -3.182939 | -0.243250 |
| H  | -7.778562 | 0.822868  | -1.142108 | C                                         | 3.115952  | -1.465534 | 1.256244  |
| H  | -7.817645 | -0.328961 | -2.475644 | C                                         | 2.707678  | -2.753662 | 1.670944  |
| Ni | 1.441401  | -0.512359 | 0.508633  | C                                         | 4.202100  | -0.904160 | 1.963814  |
| C  | 5.440999  | 5.550279  | 0.742622  | C                                         | 3.316066  | -3.426558 | 2.735557  |
| C  | 4.304315  | 5.595657  | -0.066980 | H                                         | 1.896863  | -3.255178 | 1.146929  |
| C  | 3.262131  | 4.690284  | 0.132136  | C                                         | 4.823427  | -1.563197 | 3.024367  |
| C  | 3.323359  | 3.706713  | 1.140320  | H                                         | 4.587316  | 0.060642  | 1.645813  |
| C  | 4.476280  | 3.684557  | 1.953153  | C                                         | 4.373225  | -2.827610 | 3.420987  |
| C  | 5.516394  | 4.588357  | 1.755124  | H                                         | 2.972024  | -4.417404 | 3.025670  |
| H  | 6.253932  | 6.255624  | 0.592142  | H                                         | 5.661871  | -1.099905 | 3.540730  |
| H  | 4.228396  | 6.337657  | -0.858553 | H                                         | 4.853877  | -3.344547 | 4.248429  |
| H  | 2.380350  | 4.733805  | -0.502672 | O                                         | 2.057797  | -1.438042 | -1.185317 |
| H  | 4.551314  | 2.960209  | 2.759130  | C                                         | 1.567903  | -2.700733 | -1.693428 |
| H  | 6.390982  | 4.547153  | 2.400136  | H                                         | 0.525222  | -2.782035 | -1.385328 |
| C  | 2.206968  | 2.768365  | 1.292508  | H                                         | 0.253189  | -0.899353 | 3.374551  |
| H  | 1.305445  | 3.025253  | 0.735198  | H                                         | 2.130194  | -3.518495 | -1.236448 |
| C  | 2.216688  | 1.618822  | 2.008818  | C                                         | 1.684575  | -2.753316 | -3.209692 |
| H  | 3.124400  | 1.357208  | 2.547665  | H                                         | 1.136457  | -1.924809 | -3.671436 |
| C  | 1.120963  | 0.636288  | 2.090929  | H                                         | 2.731612  | -2.702122 | -3.521159 |
| H  | 0.167640  | 1.131127  | 1.896809  | H                                         | 1.259849  | -3.694924 | -3.578410 |
| C  | 1.033030  | -0.129940 | 3.412288  |                                           |           |           |           |
| H  | 0.778641  | 0.550217  | 4.241256  | <b>IM6a</b>                               |           |           |           |
| H  | 1.974083  | -0.626260 | 3.666229  | SCF energy in Ethanol: -2889.880718 a.u.  |           |           |           |
| B  | 3.447763  | -1.316298 | -0.792645 | Free energy in Ethanol: -2888.942110 a.u. |           |           |           |
| O  | 4.070057  | -0.064890 | -0.969877 | P                                         | -0.009337 | 0.977095  | 0.977479  |
| O  | 4.299277  | -2.357308 | -1.198326 | N                                         | 0.468403  | 2.006860  | 2.208263  |

|   |           |           |           |   |           |           |           |
|---|-----------|-----------|-----------|---|-----------|-----------|-----------|
| C | 0.096863  | 3.419741  | 2.137782  | C | -3.340297 | -1.870917 | 1.427806  |
| H | -0.327034 | 3.741441  | 3.097948  | C | -2.000822 | -2.191501 | 3.446243  |
| H | 0.968048  | 4.047689  | 1.906360  | C | -4.441199 | -1.570638 | 2.237360  |
| H | -0.658415 | 3.571035  | 1.360494  | C | -3.132068 | -1.897593 | 4.215040  |
| C | 1.359207  | 1.674515  | 3.319328  | C | -4.358966 | -1.571524 | 3.632639  |
| H | 1.688596  | 0.639281  | 3.247765  | H | -5.386932 | -1.322144 | 1.760303  |
| H | 2.236989  | 2.331515  | 3.319742  | H | -3.049713 | -1.925682 | 5.300101  |
| H | 0.828905  | 1.808549  | 4.272171  | C | -0.705028 | -2.542791 | 4.143173  |
| O | 0.185237  | -0.435003 | 1.842912  | H | -0.251783 | -3.448979 | 3.725266  |
| O | 1.199146  | 0.786828  | -0.179734 | H | 0.032833  | -1.737960 | 4.043257  |
| C | 0.211387  | -1.636695 | 1.132635  | H | -0.873379 | -2.710523 | 5.211820  |
| C | 1.368598  | -1.955128 | 0.412034  | C | -3.514877 | -1.874634 | -0.075873 |
| C | -0.904193 | -2.485606 | 1.197297  | H | -2.733134 | -1.302405 | -0.586442 |
| C | 1.358365  | -3.098251 | -0.427791 | H | -3.483621 | -2.890260 | -0.488812 |
| C | 2.570378  | -1.064210 | 0.510376  | H | -4.479800 | -1.437346 | -0.347053 |
| C | -0.838262 | -3.654798 | 0.437182  | C | -5.559267 | -1.216324 | 4.479349  |
| C | 0.242898  | -3.954705 | -0.400046 | H | -5.740089 | -0.133366 | 4.475477  |
| C | 2.459614  | 0.281937  | 0.122552  | H | -6.471455 | -1.694713 | 4.104089  |
| C | 3.820814  | -1.544534 | 0.972209  | H | -5.420090 | -1.523930 | 5.521122  |
| H | -1.678785 | -4.344094 | 0.474478  | C | 0.142453  | -5.184353 | -1.290282 |
| C | 3.580315  | 1.122067  | -0.008569 | C | 1.470083  | -5.583820 | -1.941595 |
| C | 4.954132  | -0.717525 | 0.866029  | C | 2.152938  | -4.339110 | -2.513881 |
| C | 4.816628  | 0.572643  | 0.343762  | C | 2.515062  | -3.367624 | -1.382929 |
| C | 3.483824  | 2.524844  | -0.522153 | H | 3.059878  | -4.605165 | -3.070209 |
| C | 3.841056  | 3.621082  | 0.292012  | H | 2.130653  | -6.051017 | -1.197094 |
| C | 3.080595  | 2.758526  | -1.860606 | H | 1.292154  | -6.332779 | -2.722552 |
| C | 3.729742  | 4.921754  | -0.220481 | H | -0.591473 | -4.975935 | -2.083143 |
| C | 2.996429  | 4.070266  | -2.330928 | H | -0.270537 | -6.020086 | -0.710528 |
| C | 3.300823  | 5.171831  | -1.522970 | H | 3.370164  | -3.787000 | -0.834995 |
| H | 3.995949  | 5.760230  | 0.420964  | H | 2.870963  | -2.417526 | -1.797601 |
| H | 2.691058  | 4.236932  | -3.362318 | H | 1.473034  | -3.849539 | -3.224931 |
| C | 4.382547  | 3.459453  | 1.697857  | H | 5.705262  | 1.189743  | 0.230536  |
| H | 5.481079  | 3.471503  | 1.701439  | C | 6.344028  | -1.201401 | 1.254984  |
| H | 4.055374  | 4.286062  | 2.338599  | H | 6.881251  | -1.490821 | 0.338362  |
| H | 4.075358  | 2.519243  | 2.158983  | H | 6.915499  | -0.368629 | 1.683724  |
| C | 3.167250  | 6.580974  | -2.051808 | C | 3.924388  | -2.884210 | 1.691581  |
| H | 3.625723  | 6.682272  | -3.042670 | C | 6.335847  | -2.394783 | 2.216498  |
| H | 2.112965  | 6.869335  | -2.155701 | H | 6.041985  | -2.062160 | 3.222167  |
| H | 3.643349  | 7.306541  | -1.384256 | H | 7.347288  | -2.809737 | 2.303365  |
| C | 2.774931  | 1.619646  | -2.807466 | C | 5.346186  | -3.456215 | 1.728322  |
| H | 3.544190  | 0.840416  | -2.761428 | H | 3.584926  | -2.725639 | 2.727543  |
| H | 1.817529  | 1.145294  | -2.567365 | H | 3.228204  | -3.613627 | 1.273599  |
| H | 2.718796  | 1.980453  | -3.839212 | H | 5.638835  | -3.793194 | 0.723182  |
| C | -2.100291 | -2.168053 | 2.038153  | H | 5.369354  | -4.340027 | 2.377395  |



|    |           |           |           |   |           |           |           |
|----|-----------|-----------|-----------|---|-----------|-----------|-----------|
| Ni | -2.011404 | 1.626591  | 0.094368  | H | 1.261905  | -0.890138 | -2.877685 |
| C  | -2.637351 | -3.113756 | -5.412252 | H | -0.091525 | -1.874381 | -3.484357 |
| C  | -1.284577 | -2.939330 | -5.112459 | H | 0.117238  | -0.200312 | -4.047952 |
| C  | -0.877264 | -1.880738 | -4.302285 | O | 1.369109  | 0.775799  | -1.182117 |
| C  | -1.804437 | -0.961952 | -3.770012 | O | 0.451502  | -1.030447 | 0.395149  |
| C  | -3.166215 | -1.158682 | -4.080826 | C | 2.416366  | 1.015222  | -0.295184 |
| C  | -3.573574 | -2.215599 | -4.889905 | C | 3.101355  | -0.082989 | 0.237257  |
| H  | -2.959674 | -3.938254 | -6.042401 | C | 2.770455  | 2.343343  | -0.009700 |
| H  | -0.543632 | -3.626213 | -5.514400 | C | 4.093788  | 0.140933  | 1.226771  |
| H  | 0.179383  | -1.747132 | -4.081004 | C | 2.742149  | -1.471112 | -0.199375 |
| H  | -3.913390 | -0.481761 | -3.676861 | C | 3.828184  | 2.526603  | 0.882728  |
| H  | -4.630303 | -2.343602 | -5.111376 | C | 4.467908  | 1.462459  | 1.529457  |
| C  | -1.315467 | 0.137436  | -2.935358 | C | 1.433151  | -1.937567 | 0.008449  |
| H  | -0.269157 | 0.063401  | -2.639953 | C | 3.696119  | -2.343198 | -0.780275 |
| C  | -2.014606 | 1.221903  | -2.516309 | H | 4.142638  | 3.543140  | 1.108541  |
| H  | -3.053538 | 1.335595  | -2.824560 | C | 1.090458  | -3.295322 | -0.120265 |
| C  | -1.486510 | 2.294042  | -1.662565 | C | 3.364326  | -3.698290 | -0.960250 |
| H  | -0.393856 | 2.245138  | -1.593386 | C | 2.095436  | -4.150143 | -0.583116 |
| C  | -1.939128 | 3.706660  | -2.018639 | C | -0.247071 | -3.843539 | 0.269577  |
| H  | -1.468924 | 4.028572  | -2.961536 | C | -1.074121 | -4.480322 | -0.681659 |
| H  | -3.023887 | 3.766708  | -2.142303 | C | -0.652690 | -3.805790 | 1.626088  |
| C  | -3.767786 | 2.302167  | 0.086527  | C | -2.290162 | -5.040678 | -0.269153 |
| C  | -4.867698 | 1.687753  | -0.546737 | C | -1.872482 | -4.382313 | 1.991253  |
| C  | -4.060055 | 3.346419  | 0.990939  | C | -2.712874 | -5.001803 | 1.061231  |
| C  | -6.184287 | 2.070892  | -0.274645 | H | -2.917213 | -5.531040 | -1.012200 |
| H  | -4.699273 | 0.886836  | -1.263859 | H | -2.170502 | -4.354839 | 3.037431  |
| C  | -5.374721 | 3.735519  | 1.270677  | C | -0.686575 | -4.610045 | -2.140179 |
| H  | -3.249588 | 3.875912  | 1.491000  | H | -0.130702 | -5.538412 | -2.328494 |
| C  | -6.442748 | 3.097480  | 0.637235  | H | -1.578255 | -4.637980 | -2.775955 |
| H  | -7.010158 | 1.569823  | -0.776446 | H | -0.049969 | -3.787586 | -2.473092 |
| H  | -5.563313 | 4.541887  | 1.976978  | C | -4.039582 | -5.591232 | 1.479586  |
| H  | -7.465791 | 3.401918  | 0.845473  | H | -4.026787 | -5.897784 | 2.530925  |
| H  | -1.653499 | 4.429022  | -1.246340 | H | -4.851181 | -4.861261 | 1.361192  |

### IM6b

SCF energy in Ethanol: -2889.879656 a.u.

Free energy in Ethanol: -2888.937895 a.u.

|   |           |           |           |   |           |           |           |
|---|-----------|-----------|-----------|---|-----------|-----------|-----------|
| P | -0.090886 | 0.198909  | -0.615080 | H | -0.172725 | -3.433616 | 3.695011  |
| N | -0.628058 | -0.390516 | -2.084678 | C | 2.047267  | 3.508373  | -0.607225 |
| C | -2.061775 | -0.430948 | -2.374416 | C | 1.246521  | 4.332512  | 0.216746  |
| H | -2.396617 | -1.463854 | -2.536637 | C | 2.166327  | 3.797670  | -1.982852 |
| H | -2.634839 | -0.014548 | -1.542751 | C | 0.555602  | 5.403282  | -0.358271 |
| H | -2.279562 | 0.152858  | -3.279040 | C | 1.465607  | 4.887310  | -2.512707 |
| C | 0.216267  | -0.866700 | -3.179724 | C | 0.645250  | 5.695363  | -1.722560 |

|    |           |           |           |                                           |           |           |           |
|----|-----------|-----------|-----------|-------------------------------------------|-----------|-----------|-----------|
| H  | -0.085831 | 6.011869  | 0.275138  | C                                         | -6.469586 | -0.466601 | 0.194898  |
| H  | 1.563157  | 5.106348  | -3.574494 | C                                         | -7.696942 | -0.836214 | -0.347413 |
| C  | 3.040675  | 2.964335  | -2.893282 | H                                         | -8.806282 | -2.346271 | -1.425994 |
| H  | 4.042499  | 2.819886  | -2.472352 | H                                         | -6.843316 | -3.868733 | -1.625450 |
| H  | 2.612174  | 1.968478  | -3.055419 | H                                         | -4.660370 | -3.210002 | -0.665267 |
| H  | 3.151317  | 3.444852  | -3.870695 | H                                         | -6.380566 | 0.491381  | 0.698767  |
| C  | 1.110710  | 4.084026  | 1.704150  | H                                         | -8.545588 | -0.162483 | -0.257745 |
| H  | 0.881364  | 3.034818  | 1.921601  | C                                         | -4.029277 | -0.985728 | 0.649390  |
| H  | 2.032480  | 4.329786  | 2.245884  | H                                         | -3.265930 | -1.750928 | 0.503022  |
| H  | 0.305063  | 4.694644  | 2.119310  | C                                         | -3.672399 | 0.145022  | 1.305144  |
| C  | -0.124221 | 6.854451  | -2.312679 | H                                         | -4.416222 | 0.920152  | 1.486036  |
| H  | -0.026444 | 6.886514  | -3.402746 | C                                         | -2.318617 | 0.443962  | 1.795618  |
| H  | -1.191131 | 6.782139  | -2.069746 | H                                         | -1.670203 | -0.437316 | 1.726783  |
| H  | 0.231698  | 7.815217  | -1.918314 | C                                         | -2.249382 | 1.038012  | 3.199863  |
| C  | 5.522247  | 1.788052  | 2.578010  | H                                         | -2.481798 | 0.262962  | 3.947210  |
| C  | 6.336208  | 0.572834  | 3.033032  | H                                         | -2.967259 | 1.851621  | 3.333880  |
| C  | 5.395863  | -0.606550 | 3.292243  | C                                         | -2.641627 | 3.115216  | 0.708374  |
| C  | 4.707311  | -1.028595 | 1.987952  | C                                         | -2.579676 | 4.070757  | 1.741854  |
| H  | 5.940864  | -1.461782 | 3.709580  | C                                         | -3.398929 | 3.461400  | -0.432637 |
| H  | 7.062101  | 0.293639  | 2.255994  | C                                         | -3.207858 | 5.314509  | 1.632436  |
| H  | 6.913800  | 0.825289  | 3.930277  | H                                         | -2.023860 | 3.849049  | 2.650130  |
| H  | 5.019523  | 2.225698  | 3.453777  | C                                         | -4.027654 | 4.707137  | -0.553170 |
| H  | 6.185284  | 2.573759  | 2.192791  | H                                         | -3.510686 | 2.748930  | -1.250360 |
| H  | 5.448694  | -1.544170 | 1.362271  | C                                         | -3.932613 | 5.639082  | 0.481319  |
| H  | 3.929594  | -1.772834 | 2.193964  | H                                         | -3.133561 | 6.032967  | 2.446830  |
| H  | 4.642621  | -0.315412 | 4.037881  | H                                         | -4.601712 | 4.940864  | -1.447775 |
| H  | 1.869045  | -5.210293 | -0.672248 | H                                         | -4.428060 | 6.603663  | 0.398904  |
| C  | 4.368593  | -4.708889 | -1.496272 | H                                         | -1.249942 | 1.424266  | 3.430920  |
| H  | 4.783268  | -5.272643 | -0.646236 |                                           |           |           |           |
| H  | 3.848441  | -5.448353 | -2.117959 |                                           |           |           |           |
| C  | 5.016633  | -1.805212 | -1.317889 | <b>IM7a</b>                               |           |           |           |
| C  | 5.525281  | -4.074911 | -2.276611 | SCF energy in Ethanol: -2889.911779 a.u.  |           |           |           |
| H  | 5.169339  | -3.731451 | -3.258272 | Free energy in Ethanol: -2888.966753 a.u. |           |           |           |
| H  | 6.301637  | -4.825850 | -2.466589 | P                                         | -0.237329 | -1.004497 | -0.389732 |
| C  | 6.092318  | -2.881911 | -1.501709 | N                                         | 0.084364  | -1.855848 | -1.799700 |
| H  | 4.808844  | -1.349405 | -2.299034 | C                                         | 0.168244  | -3.313939 | -1.712142 |
| H  | 5.391766  | -0.987791 | -0.699183 | H                                         | -0.687458 | -3.787879 | -2.206966 |
| H  | 6.452701  | -3.222169 | -0.519907 | H                                         | 1.100230  | -3.661845 | -2.172349 |
| H  | 6.955901  | -2.452119 | -2.023615 | H                                         | 0.170636  | -3.634646 | -0.667079 |
| Ni | -1.553364 | 1.606462  | 0.422132  | C                                         | -0.085252 | -1.349995 | -3.160942 |
| C  | -7.845719 | -2.062216 | -1.004681 | H                                         | 0.051472  | -0.270570 | -3.190160 |
| C  | -6.745271 | -2.913979 | -1.114280 | H                                         | 0.664071  | -1.814189 | -3.813056 |
| C  | -5.515500 | -2.544360 | -0.571179 | H                                         | -1.085249 | -1.595191 | -3.546825 |
| C  | -5.346705 | -1.315389 | 0.099106  | O                                         | -0.735206 | 0.417067  | -1.119877 |
|    |           |           |           | O                                         | 1.242596  | -0.554131 | 0.260620  |

|   |           |           |           |    |           |           |           |
|---|-----------|-----------|-----------|----|-----------|-----------|-----------|
| C | -0.617147 | 1.636469  | -0.455448 | H  | -2.829729 | 2.714072  | -4.001372 |
| C | 0.666105  | 2.138444  | -0.195743 | C  | -3.930003 | 1.512211  | 1.741990  |
| C | -1.778756 | 2.367130  | -0.145507 | H  | -3.175179 | 0.741598  | 1.934459  |
| C | 0.807832  | 3.278854  | 0.633492  | H  | -3.568132 | 2.439109  | 2.199820  |
| C | 1.864067  | 1.486881  | -0.818106 | H  | -4.847639 | 1.218015  | 2.261260  |
| C | -1.595889 | 3.548197  | 0.579557  | C  | -7.142914 | 1.153464  | -2.113636 |
| C | -0.342971 | 3.983542  | 1.025810  | H  | -7.316582 | 1.588683  | -3.103549 |
| C | 2.162812  | 0.152108  | -0.508906 | H  | -7.286479 | 0.068252  | -2.201457 |
| C | 2.696899  | 2.194547  | -1.720362 | H  | -7.919825 | 1.527723  | -1.437305 |
| H | -2.473584 | 4.146420  | 0.815017  | C  | -0.277247 | 5.206382  | 1.927768  |
| C | 3.355424  | -0.464970 | -0.927269 | C  | 1.132710  | 5.789475  | 2.070581  |
| C | 3.892293  | 1.595553  | -2.155937 | C  | 2.135070  | 4.660222  | 2.320555  |
| C | 4.209667  | 0.304852  | -1.722092 | C  | 2.187002  | 3.714533  | 1.113605  |
| C | 3.744688  | -1.858800 | -0.545220 | H  | 3.137995  | 5.060148  | 2.513336  |
| C | 3.874428  | -2.863997 | -1.527906 | H  | 1.411078  | 6.327684  | 1.152977  |
| C | 4.061530  | -2.157080 | 0.800181  | H  | 1.151694  | 6.523390  | 2.885313  |
| C | 4.256798  | -4.154792 | -1.140167 | H  | -0.644552 | 4.924541  | 2.926720  |
| C | 4.446042  | -3.456816 | 1.140259  | H  | -0.975684 | 5.969011  | 1.559136  |
| C | 4.536139  | -4.477642 | 0.188473  | H  | 2.728184  | 4.220597  | 0.302118  |
| H | 4.342378  | -4.926224 | -1.903510 | H  | 2.780436  | 2.825851  | 1.355266  |
| H | 4.693888  | -3.674375 | 2.177786  | H  | 1.838636  | 4.097608  | 3.216143  |
| C | 3.643210  | -2.590085 | -2.999312 | H  | 5.152147  | -0.136147 | -2.039085 |
| H | 4.537484  | -2.165804 | -3.474655 | C  | 4.877851  | 2.323942  | -3.058684 |
| H | 3.406063  | -3.516379 | -3.533565 | H  | 5.692436  | 2.726030  | -2.436292 |
| H | 2.830995  | -1.877818 | -3.161535 | H  | 5.351002  | 1.605100  | -3.739432 |
| C | 4.915778  | -5.884279 | 0.590037  | C  | 2.253525  | 3.526093  | -2.315493 |
| H | 5.675959  | -5.884841 | 1.379478  | C  | 4.249469  | 3.476093  | -3.849929 |
| H | 4.048831  | -6.436473 | 0.977492  | H  | 3.613648  | 3.074701  | -4.651847 |
| H | 5.309789  | -6.451786 | -0.259741 | H  | 5.035077  | 4.068438  | -4.334519 |
| C | 4.035823  | -1.086490 | 1.865890  | C  | 3.399587  | 4.345882  | -2.920327 |
| H | 4.615326  | -0.206793 | 1.561197  | H  | 1.524665  | 3.303167  | -3.111009 |
| H | 3.017336  | -0.745626 | 2.075942  | H  | 1.704098  | 4.123490  | -1.585690 |
| H | 4.462072  | -1.462265 | 2.801729  | H  | 4.034521  | 4.747733  | -2.117249 |
| C | -3.146188 | 2.006022  | -0.640538 | H  | 2.988067  | 5.208188  | -3.458927 |
| C | -4.179340 | 1.655226  | 0.257342  | Ni | -1.613275 | -1.913211 | 1.055138  |
| C | -3.432710 | 2.109017  | -2.020462 | C  | 1.468970  | 1.443976  | 5.058252  |
| C | -5.460793 | 1.397999  | -0.238607 | C  | 2.013964  | 0.163911  | 4.944219  |
| C | -4.730059 | 1.841086  | -2.472414 | C  | 1.330156  | -0.830417 | 4.245117  |
| C | -5.758869 | 1.476785  | -1.601399 | C  | 0.086192  | -0.576600 | 3.639264  |
| H | -6.246087 | 1.119054  | 0.461261  | C  | -0.439123 | 0.724405  | 3.747625  |
| H | -4.941049 | 1.928201  | -3.536619 | C  | 0.238709  | 1.716350  | 4.453030  |
| C | -2.377903 | 2.521169  | -3.023200 | H  | 1.993969  | 2.218670  | 5.610700  |
| H | -1.850827 | 3.428780  | -2.707656 | H  | 2.969988  | -0.065821 | 5.407974  |
| H | -1.622312 | 1.737676  | -3.152771 | H  | 1.753856  | -1.829830 | 4.180501  |

|   |           |           |           |   |           |           |           |
|---|-----------|-----------|-----------|---|-----------|-----------|-----------|
| H | -1.381599 | 0.967374  | 3.267339  | C | -1.584023 | 3.597155  | 1.086923  |
| H | -0.196889 | 2.709547  | 4.529637  | C | -0.318081 | 3.977653  | 1.544380  |
| C | -0.643704 | -1.689861 | 2.998655  | C | 2.124006  | 0.364662  | -0.504737 |
| H | -0.056759 | -2.602473 | 2.874655  | C | 2.672520  | 2.538858  | -1.453705 |
| C | -2.038514 | -1.826008 | 3.079245  | H | -2.452496 | 4.151272  | 1.434875  |
| H | -2.620225 | -0.976358 | 3.438274  | C | 3.313309  | -0.204259 | -0.996166 |
| C | -2.732541 | -2.884538 | 2.457500  | C | 3.862740  | 1.989353  | -1.962895 |
| H | -2.205043 | -3.838811 | 2.368658  | C | 4.171614  | 0.652902  | -1.691312 |
| C | -4.237363 | -2.987420 | 2.510983  | C | 3.693556  | -1.635155 | -0.781211 |
| H | -4.563514 | -3.524076 | 3.413866  | C | 3.865064  | -2.509837 | -1.877307 |
| H | -4.703021 | -1.995487 | 2.524044  | C | 3.954754  | -2.101874 | 0.527984  |
| C | -2.753961 | -2.618158 | -0.342280 | C | 4.232779  | -3.840110 | -1.639802 |
| C | -2.930566 | -4.005759 | -0.527128 | C | 4.326244  | -3.436259 | 0.715916  |
| C | -3.439579 | -1.778474 | -1.241872 | C | 4.456578  | -4.329079 | -0.351690 |
| C | -3.734028 | -4.526585 | -1.547161 | H | 4.351333  | -4.509565 | -2.490253 |
| H | -2.433182 | -4.710502 | 0.138961  | H | 4.527349  | -3.783679 | 1.727550  |
| C | -4.250291 | -2.290040 | -2.263149 | C | 3.695785  | -2.058473 | -3.313399 |
| H | -3.340354 | -0.700334 | -1.160994 | H | 4.624334  | -1.628085 | -3.711678 |
| C | -4.401653 | -3.668057 | -2.423479 | H | 3.436055  | -2.905548 | -3.957514 |
| H | -3.840567 | -5.604950 | -1.652957 | H | 2.922754  | -1.293957 | -3.417701 |
| H | -4.761139 | -1.601366 | -2.933639 | C | 4.817395  | -5.777789 | -0.117633 |
| H | -5.030593 | -4.067648 | -3.215675 | H | 5.469548  | -5.892927 | 0.755247  |
| H | -4.624566 | -3.527616 | 1.642814  | H | 3.921813  | -6.387192 | 0.065252  |

### IM7b

SCF energy in Ethanol: -2889.912048 a.u.

Free energy in Ethanol: -2888.967889 a.u.

|   |           |           |           |   |           |           |           |
|---|-----------|-----------|-----------|---|-----------|-----------|-----------|
| P | -0.272891 | -0.793327 | -0.559033 | H | 4.319701  | -1.654570 | 2.604203  |
| N | 0.055741  | -1.410339 | -2.080585 | C | -3.184255 | 2.165317  | -0.201171 |
| C | 0.128191  | -2.863312 | -2.235690 | C | -4.160983 | 1.797312  | 0.752580  |
| H | -0.698718 | -3.231563 | -2.854237 | C | -3.559247 | 2.289476  | -1.561394 |
| H | 1.084728  | -3.143680 | -2.692249 | C | -5.459794 | 1.496855  | 0.322839  |
| H | 0.062802  | -3.355440 | -1.262737 | C | -4.872442 | 1.996321  | -1.939505 |
| C | 0.003362  | -0.676229 | -3.342031 | C | -5.836370 | 1.576942  | -1.018063 |
| H | 0.114759  | 0.392863  | -3.171427 | H | -6.198158 | 1.196703  | 1.064315  |
| H | 0.817345  | -1.011755 | -3.995873 | H | -5.150426 | 2.102017  | -2.986600 |
| H | -0.952405 | -0.859307 | -3.854480 | C | -2.586545 | 2.763592  | -2.618227 |
| O | -0.779311 | 0.727916  | -1.050414 | H | -2.016325 | 3.636626  | -2.281508 |
| O | 1.195728  | -0.425449 | 0.167283  | H | -1.862574 | 1.981918  | -2.871848 |
| C | -0.641234 | 1.842686  | -0.227293 | H | -3.118466 | 3.038822  | -3.534496 |
| C | 0.649979  | 2.305383  | 0.066469  | C | -3.879444 | 1.749649  | 2.240751  |
| C | -1.793380 | 2.515599  | 0.225949  | H | -2.840386 | 1.499159  | 2.464497  |
| C | 0.817911  | 3.324490  | 1.037566  | H | -4.080152 | 2.720023  | 2.714611  |
| C | 1.835137  | 1.729472  | -0.646475 | H | -4.524494 | 1.015610  | 2.735093  |

|    |           |           |           |                                           |           |           |           |
|----|-----------|-----------|-----------|-------------------------------------------|-----------|-----------|-----------|
| C  | -7.231052 | 1.205563  | -1.463769 | C                                         | -2.141899 | -2.242724 | 2.673495  |
| H  | -7.278429 | 0.150388  | -1.764482 | H                                         | -1.869333 | -3.236172 | 3.032954  |
| H  | -7.961789 | 1.348678  | -0.660500 | C                                         | -3.340695 | -2.122924 | 1.947001  |
| H  | -7.550346 | 1.803489  | -2.324645 | H                                         | -3.742180 | -1.119830 | 1.788912  |
| C  | -0.223661 | 5.076806  | 2.592082  | C                                         | -4.362690 | -3.230762 | 1.903824  |
| C  | 1.195819  | 5.620289  | 2.785643  | H                                         | -4.929856 | -3.211639 | 0.969590  |
| C  | 2.185658  | 4.455468  | 2.871245  | H                                         | -5.076610 | -3.130246 | 2.734315  |
| C  | 2.209234  | 3.679427  | 1.548068  | C                                         | -2.767141 | -2.474134 | -0.774760 |
| H  | 3.196261  | 4.812932  | 3.102502  | C                                         | -3.461451 | -1.647156 | -1.678257 |
| H  | 1.469231  | 6.266568  | 1.939274  | C                                         | -2.852081 | -3.863100 | -0.995825 |
| H  | 1.237278  | 6.243615  | 3.686882  | C                                         | -4.191758 | -2.176854 | -2.749111 |
| H  | -0.583364 | 4.677260  | 3.552658  | H                                         | -3.435483 | -0.567384 | -1.554735 |
| H  | -0.915361 | 5.888292  | 2.330598  | C                                         | -3.574900 | -4.401186 | -2.066291 |
| H  | 2.744436  | 4.284305  | 0.803355  | H                                         | -2.344580 | -4.551583 | -0.319423 |
| H  | 2.797389  | 2.761233  | 1.657325  | C                                         | -4.249939 | -3.557467 | -2.951547 |
| H  | 1.890579  | 3.787002  | 3.692697  | H                                         | -4.716425 | -1.504522 | -3.426062 |
| H  | 5.111947  | 0.249001  | -2.059581 | H                                         | -3.613616 | -5.480339 | -2.205221 |
| C  | 4.851912  | 2.817862  | -2.769753 | H                                         | -4.816340 | -3.970536 | -3.783041 |
| H  | 5.667268  | 3.139616  | -2.103156 |                                           |           |           |           |
| H  | 5.322913  | 2.185281  | -3.532452 |                                           |           |           |           |
| C  | 2.238334  | 3.938214  | -1.875579 | <b>TS5a</b>                               |           |           |           |
| C  | 4.227448  | 4.059178  | -3.415340 | SCF energy in Ethanol: -2889.851387 a.u.  |           |           |           |
| H  | 3.586025  | 3.759238  | -4.256179 | Free energy in Ethanol: -2888.912240 a.u. |           |           |           |
| H  | 5.014618  | 4.700632  | -3.829823 | P                                         | -0.476363 | 0.695395  | -0.806605 |
| C  | 3.386871  | 4.817541  | -2.384963 | N                                         | -1.126872 | 1.434942  | -2.164691 |
| H  | 1.501654  | 3.822682  | -2.686512 | C                                         | -0.793028 | 2.827083  | -2.451684 |
| H  | 1.699645  | 4.445711  | -1.072806 | H                                         | -0.512411 | 2.931418  | -3.508054 |
| H  | 4.027762  | 5.119712  | -1.543573 | H                                         | -1.643681 | 3.491125  | -2.243517 |
| H  | 2.977567  | 5.739390  | -2.815987 | H                                         | 0.057827  | 3.141796  | -1.845135 |
| H  | -3.891408 | -4.216540 | 1.987707  | C                                         | -2.115684 | 0.862818  | -3.075705 |
| Ni | -1.731115 | -1.805362 | 0.707341  | H                                         | -2.396470 | -0.139556 | -2.758900 |
| C  | 2.413298  | -1.612367 | 5.060449  | H                                         | -3.015230 | 1.490059  | -3.113157 |
| C  | 1.837954  | -0.361682 | 4.826949  | H                                         | -1.697190 | 0.806346  | -4.090629 |
| C  | 0.704527  | -0.248431 | 4.022588  | O                                         | -0.734793 | -0.874085 | -1.352381 |
| C  | 0.110249  | -1.379275 | 3.432064  | O                                         | -1.587185 | 0.730533  | 0.472283  |
| C  | 0.726622  | -2.627270 | 3.647133  | C                                         | -0.806282 | -1.931805 | -0.456163 |
| C  | 1.854612  | -2.742467 | 4.456825  | C                                         | -1.937044 | -2.048186 | 0.365783  |
| H  | 3.290117  | -1.704977 | 5.695694  | C                                         | 0.226394  | -2.885814 | -0.447423 |
| H  | 2.266237  | 0.528823  | 5.280628  | C                                         | -1.953787 | -3.040873 | 1.380083  |
| H  | 0.254020  | 0.728455  | 3.861369  | C                                         | -3.094427 | -1.111690 | 0.192517  |
| H  | 0.318042  | -3.517895 | 3.177033  | C                                         | 0.118546  | -3.918345 | 0.486537  |
| H  | 2.302092  | -3.720783 | 4.614673  | C                                         | -0.916865 | -3.988912 | 1.424957  |
| C  | -1.162196 | -1.228375 | 2.697558  | C                                         | -2.886284 | 0.267133  | 0.355740  |
| H  | -1.507690 | -0.198315 | 2.609475  | C                                         | -4.399570 | -1.581183 | -0.097296 |
|    |           |           |           | H                                         | 0.890850  | -4.684289 | 0.500044  |

|   |           |           |           |    |           |           |           |
|---|-----------|-----------|-----------|----|-----------|-----------|-----------|
| C | -3.952255 | 1.181969  | 0.448401  | C  | -2.155366 | -5.240394 | 3.280168  |
| C | -5.479145 | -0.681648 | -0.033841 | C  | -2.684069 | -3.862421 | 3.684200  |
| C | -5.238335 | 0.660368  | 0.279750  | C  | -3.054307 | -3.051937 | 2.435463  |
| C | -3.744989 | 2.635552  | 0.739237  | H  | -3.562734 | -3.951839 | 4.334406  |
| C | -4.160538 | 3.622942  | -0.181717 | H  | -2.910901 | -5.753086 | 2.667560  |
| C | -3.174192 | 3.037173  | 1.972578  | H  | -1.979302 | -5.871859 | 4.159339  |
| C | -3.953793 | 4.975688  | 0.120834  | H  | -0.040999 | -4.840099 | 3.185621  |
| C | -2.998242 | 4.398162  | 2.234267  | H  | -0.572017 | -6.029098 | 2.013172  |
| C | -3.367215 | 5.387486  | 1.317025  | H  | -3.979561 | -3.472448 | 2.017965  |
| H | -4.268392 | 5.726217  | -0.602411 | H  | -3.299571 | -2.020248 | 2.711658  |
| H | -2.567090 | 4.694416  | 3.189015  | H  | -1.914195 | -3.331485 | 4.261951  |
| C | -4.855250 | 3.288080  | -1.485804 | H  | -6.085948 | 1.335953  | 0.371117  |
| H | -5.946014 | 3.254089  | -1.360346 | C  | -6.917411 | -1.134250 | -0.243623 |
| H | -4.645669 | 4.051607  | -2.242842 | H  | -7.393443 | -1.256145 | 0.741888  |
| H | -4.553220 | 2.316564  | -1.881946 | H  | -7.481659 | -0.340859 | -0.749815 |
| C | -3.129350 | 6.850176  | 1.612976  | C  | -4.623833 | -3.005253 | -0.591400 |
| H | -3.353135 | 7.089437  | 2.659006  | C  | -7.042195 | -2.452682 | -1.015213 |
| H | -2.081294 | 7.127895  | 1.437071  | H  | -6.811354 | -2.286772 | -2.077132 |
| H | -3.748685 | 7.493468  | 0.979035  | H  | -8.076490 | -2.814832 | -0.969165 |
| C | -2.777647 | 2.034878  | 3.033606  | C  | -6.070960 | -3.490162 | -0.445245 |
| H | -3.556338 | 1.278878  | 3.186073  | H  | -4.354985 | -3.027434 | -1.659546 |
| H | -1.860464 | 1.503880  | 2.756601  | H  | -3.935315 | -3.703232 | -0.111181 |
| H | -2.602614 | 2.537319  | 3.990395  | H  | -6.302282 | -3.661390 | 0.616336  |
| C | 1.382872  | -2.847226 | -1.396479 | H  | -6.187790 | -4.455200 | -0.953355 |
| C | 2.691232  | -2.633480 | -0.910501 | Ni | 1.362789  | 1.432155  | -0.017329 |
| C | 1.181957  | -3.093207 | -2.773015 | C  | 8.528756  | -0.640268 | 2.915898  |
| C | 3.765571  | -2.651272 | -1.807829 | C  | 7.413297  | -1.244928 | 3.497420  |
| C | 2.284726  | -3.104457 | -3.632557 | C  | 6.131127  | -0.795962 | 3.183844  |
| C | 3.585274  | -2.878367 | -3.174167 | C  | 5.928097  | 0.270055  | 2.287357  |
| H | 4.770375  | -2.484080 | -1.423874 | C  | 7.065038  | 0.859029  | 1.699470  |
| H | 2.121229  | -3.302281 | -4.690496 | C  | 8.345612  | 0.412691  | 2.013771  |
| C | -0.195058 | -3.366885 | -3.335013 | H  | 9.529767  | -0.988533 | 3.155639  |
| H | -0.731332 | -4.118555 | -2.744476 | H  | 7.540395  | -2.067978 | 4.196041  |
| H | -0.809799 | -2.459514 | -3.336919 | H  | 5.266674  | -1.269661 | 3.643971  |
| H | -0.128286 | -3.729796 | -4.365721 | H  | 6.943143  | 1.662255  | 0.978668  |
| C | 2.965763  | -2.382912 | 0.556725  | H  | 9.206905  | 0.882809  | 1.545818  |
| H | 2.286817  | -1.627620 | 0.968296  | C  | 4.555862  | 0.710883  | 2.003862  |
| H | 2.837047  | -3.289534 | 1.160601  | H  | 3.773795  | 0.044668  | 2.368362  |
| H | 3.991974  | -2.033252 | 0.702881  | C  | 4.180764  | 1.837311  | 1.368768  |
| C | 4.755411  | -2.859379 | -4.130373 | H  | 4.938217  | 2.546212  | 1.035389  |
| H | 4.889130  | -1.863723 | -4.575110 | C  | 2.776600  | 2.240685  | 1.103653  |
| H | 5.691834  | -3.117945 | -3.624388 | H  | 2.102356  | 1.516393  | 1.656840  |
| H | 4.610509  | -3.564211 | -4.956816 | C  | 2.460897  | 3.662426  | 1.579267  |
| C | -0.855833 | -5.079319 | 2.485276  | H  | 2.584923  | 3.728329  | 2.668091  |

|   |          |          |           |   |           |          |           |
|---|----------|----------|-----------|---|-----------|----------|-----------|
| H | 3.138457 | 4.391789 | 1.122949  | C | -3.893796 | 2.315775 | 0.955946  |
| C | 2.810809 | 2.283000 | -0.915397 | C | -4.337602 | 4.236477 | -1.019723 |
| C | 3.681224 | 1.368873 | -1.550544 | C | -4.192205 | 3.638427 | 1.290459  |
| C | 2.704556 | 3.576544 | -1.463900 | C | -4.402401 | 4.622778 | 0.318287  |
| C | 4.350010 | 1.713770 | -2.724788 | H | -4.521196 | 4.977554 | -1.795990 |
| H | 3.824627 | 0.377934 | -1.130773 | H | -4.274091 | 3.905314 | 2.342790  |
| C | 3.388610 | 3.922415 | -2.632900 | C | -4.071056 | 2.590125 | -2.881890 |
| H | 2.072635 | 4.320757 | -0.987211 | H | -5.085918 | 2.337245 | -3.217997 |
| C | 4.210971 | 2.993434 | -3.272323 | H | -3.745140 | 3.450892 | -3.476236 |
| H | 4.990776 | 0.980302 | -3.209301 | H | -3.435167 | 1.737807 | -3.127751 |
| H | 3.276763 | 4.924339 | -3.042044 | C | -4.687710 | 6.053911 | 0.710953  |
| H | 4.746081 | 3.264900 | -4.178569 | H | -5.401226 | 6.107502 | 1.541591  |
| H | 1.431914 | 3.953497 | 1.341761  | H | -3.774290 | 6.567942 | 1.039143  |

### TS6a

SCF energy in Ethanol: -2889.877025 a.u.

Free energy in Ethanol: -2888.932464 a.u.

|   |           |           |           |   |           |           |           |
|---|-----------|-----------|-----------|---|-----------|-----------|-----------|
| P | 0.208523  | 0.988018  | -0.563176 | H | -4.025999 | 1.721636  | 3.023817  |
| N | -0.099565 | 1.822656  | -1.988937 | C | 2.958734  | -2.122267 | -0.974185 |
| C | -0.184355 | 3.278378  | -1.932552 | C | 4.084017  | -1.822697 | -0.175586 |
| H | 0.495615  | 3.730016  | -2.665961 | C | 3.117932  | -2.243663 | -2.374577 |
| H | -1.209428 | 3.619647  | -2.131717 | C | 5.332547  | -1.644080 | -0.783822 |
| H | 0.105642  | 3.632486  | -0.940851 | C | 4.383198  | -2.056351 | -2.939440 |
| C | -0.403107 | 1.255863  | -3.299181 | C | 5.507661  | -1.760110 | -2.164499 |
| H | -0.439889 | 0.169726  | -3.245984 | H | 6.190678  | -1.406636 | -0.157313 |
| H | -1.367919 | 1.626055  | -3.668516 | H | 4.493192  | -2.154832 | -4.017951 |
| H | 0.373242  | 1.546944  | -4.021169 | C | 1.957759  | -2.594016 | -3.279119 |
| O | 0.556311  | -0.480025 | -1.310029 | H | 1.400494  | -3.459980 | -2.904208 |
| O | -1.266966 | 0.620920  | 0.178357  | H | 1.249042  | -1.762046 | -3.354871 |
| C | 0.465525  | -1.664124 | -0.588263 | H | 2.310886  | -2.828499 | -4.288327 |
| C | -0.800806 | -2.110729 | -0.183042 | C | 3.976410  | -1.670439 | 1.326237  |
| C | 1.630220  | -2.416261 | -0.347283 | H | 3.099710  | -1.076489 | 1.601967  |
| C | -0.893145 | -3.194686 | 0.725118  | H | 3.879280  | -2.637034 | 1.835612  |
| C | -2.034983 | -1.454160 | -0.724338 | H | 4.868077  | -1.177610 | 1.728458  |
| C | 1.485130  | -3.547478 | 0.460909  | C | 6.872198  | -1.606178 | -2.796397 |
| C | 0.270481  | -3.911229 | 1.052331  | H | 6.805152  | -1.158963 | -3.794441 |
| C | -2.265695 | -0.096109 | -0.458512 | H | 7.528661  | -0.976505 | -2.186141 |
| C | -2.975113 | -2.180105 | -1.497310 | H | 7.370135  | -2.578641 | -2.911627 |
| H | 2.363948  | -4.159395 | 0.651951  | C | 0.262322  | -5.061937 | 2.046849  |
| C | -3.485172 | 0.532021  | -0.777207 | C | -1.141197 | -5.579997 | 2.377065  |
| C | -4.193139 | -1.566767 | -1.841846 | C | -2.079292 | -4.398033 | 2.635096  |
| C | -4.434591 | -0.248128 | -1.443393 | C | -2.229532 | -3.552787 | 1.363587  |
| C | -3.793201 | 1.949824  | -0.408930 | H | -3.067570 | -4.744538 | 2.961409  |
| C | -4.051228 | 2.918429  | -1.403074 | H | -1.528711 | -6.175989 | 1.538063  |

|    |           |           |           |                                           |           |           |           |
|----|-----------|-----------|-----------|-------------------------------------------|-----------|-----------|-----------|
| H  | -1.097003 | -6.248234 | 3.245705  | H                                         | 2.161513  | 4.793048  | -0.193069 |
| H  | 0.737809  | -4.716867 | 2.977703  | C                                         | 4.640616  | 2.267027  | -1.765191 |
| H  | 0.896709  | -5.875190 | 1.670251  | H                                         | 4.163898  | 0.973311  | -0.127193 |
| H  | -2.854388 | -4.108916 | 0.650418  | C                                         | 4.436147  | 3.508964  | -2.371947 |
| H  | -2.780860 | -2.632227 | 1.584338  | H                                         | 3.388429  | 5.392385  | -2.240609 |
| H  | -1.673470 | -3.777042 | 3.445569  | H                                         | 5.333277  | 1.551010  | -2.200883 |
| H  | -5.395318 | 0.202375  | -1.683116 | H                                         | 4.977327  | 3.775838  | -3.276029 |
| C  | -5.284264 | -2.308810 | -2.600866 | H                                         | 4.815665  | 4.081318  | 1.509793  |
| H  | -6.044296 | -2.649511 | -1.880439 |                                           |           |           |           |
| H  | -5.802174 | -1.611977 | -3.271948 | <b>TS6b</b>                               |           |           |           |
| C  | -2.631634 | -3.555631 | -2.056613 | SCF energy in Ethanol: -2889.879578 a.u.  |           |           |           |
| C  | -4.770587 | -3.522373 | -3.383296 | Free energy in Ethanol: -2888.935382 a.u. |           |           |           |
| H  | -4.207778 | -3.186160 | -4.265698 | P                                         | -0.302423 | -0.528433 | -0.765066 |
| H  | -5.617081 | -4.113667 | -3.753320 | N                                         | 0.023536  | -0.898106 | -2.369391 |
| C  | -3.855503 | -4.368701 | -2.494665 | C                                         | -0.018678 | -2.296588 | -2.788545 |
| H  | -1.983305 | -3.401394 | -2.933995 | H                                         | -0.689377 | -2.414855 | -3.649297 |
| H  | -2.025558 | -4.128630 | -1.352463 | H                                         | 0.983246  | -2.654713 | -3.060840 |
| H  | -4.416522 | -4.705484 | -1.610588 | H                                         | -0.398640 | -2.922808 | -1.978586 |
| H  | -3.525389 | -5.272277 | -3.021693 | C                                         | 0.423167  | 0.028987  | -3.422597 |
| Ni | 1.586802  | 1.738480  | 0.888446  | H                                         | 0.488403  | 1.043399  | -3.034128 |
| C  | -0.626494 | -1.445853 | 5.392198  | H                                         | 1.396977  | -0.252512 | -3.843376 |
| C  | -1.336693 | -0.275312 | 5.118442  | H                                         | -0.318121 | 0.009676  | -4.234606 |
| C  | -0.770341 | 0.720349  | 4.323851  | O                                         | -0.630524 | 1.105497  | -1.027105 |
| C  | 0.515413  | 0.577846  | 3.768684  | O                                         | 1.155815  | -0.393260 | 0.075901  |
| C  | 1.215150  | -0.610645 | 4.054008  | C                                         | -0.407747 | 2.065399  | -0.050698 |
| C  | 0.654879  | -1.603133 | 4.854609  | C                                         | 0.912444  | 2.376442  | 0.311860  |
| H  | -1.059329 | -2.219851 | 6.020351  | C                                         | -1.508162 | 2.751818  | 0.498186  |
| H  | -2.331770 | -0.131050 | 5.532056  | C                                         | 1.145138  | 3.253486  | 1.403136  |
| H  | -1.327461 | 1.633596  | 4.130137  | C                                         | 2.066801  | 1.761469  | -0.419882 |
| H  | 2.210038  | -0.763033 | 3.648181  | C                                         | -1.229677 | 3.699461  | 1.486478  |
| H  | 1.224509  | -2.505955 | 5.062457  | C                                         | 0.057696  | 3.929871  | 1.981090  |
| C  | 1.070802  | 1.680939  | 2.960971  | C                                         | 2.205671  | 0.364928  | -0.415584 |
| H  | 0.415259  | 2.552578  | 2.902926  | C                                         | 3.042807  | 2.551891  | -1.075424 |
| C  | 2.433566  | 1.874467  | 2.692125  | H                                         | -2.059787 | 4.261730  | 1.908281  |
| H  | 3.142885  | 1.089656  | 2.955844  | C                                         | 3.378695  | -0.274843 | -0.860288 |
| C  | 2.969043  | 2.998739  | 1.928738  | C                                         | 4.214969  | 1.933653  | -1.546291 |
| H  | 2.357423  | 3.902392  | 1.994360  | C                                         | 4.374820  | 0.553106  | -1.387309 |
| C  | 4.446023  | 3.293828  | 2.172018  | C                                         | 3.587320  | -1.753602 | -0.763497 |
| H  | 4.584728  | 3.613915  | 3.213624  | C                                         | 3.841936  | -2.524237 | -1.921197 |
| H  | 5.058340  | 2.400634  | 2.009903  | C                                         | 3.589411  | -2.387878 | 0.503993  |
| C  | 3.018257  | 2.812133  | -0.016475 | C                                         | 4.036003  | -3.906296 | -1.797536 |
| C  | 2.845796  | 4.068466  | -0.632147 | C                                         | 3.796997  | -3.767848 | 0.576812  |
| C  | 3.964930  | 1.936881  | -0.589172 | C                                         | 4.007542  | -4.551737 | -0.561493 |
| C  | 3.542469  | 4.413624  | -1.790730 | H                                         | 4.219398  | -4.490427 | -2.697946 |



|   |           |           |           |    |           |           |           |
|---|-----------|-----------|-----------|----|-----------|-----------|-----------|
| H | 3.796662  | -4.241464 | 1.556631  | H  | 2.184316  | 3.282899  | 4.107253  |
| C | 3.946846  | -1.920933 | -3.307518 | H  | 5.305917  | 0.095237  | -1.713332 |
| H | 4.983528  | -1.647570 | -3.547224 | C  | 5.346976  | 2.729728  | -2.180547 |
| H | 3.624756  | -2.640943 | -4.067822 | H  | 6.134111  | 2.882693  | -1.425751 |
| H | 3.348651  | -1.014178 | -3.414953 | H  | 5.811616  | 2.135394  | -2.977403 |
| C | 4.188250  | -6.048267 | -0.453114 | C  | 2.783652  | 4.022846  | -1.378136 |
| H | 4.790058  | -6.317376 | 0.422576  | C  | 4.911389  | 4.096582  | -2.720093 |
| H | 3.222009  | -6.560310 | -0.348920 | H  | 4.326018  | 3.964363  | -3.641181 |
| H | 4.680781  | -6.458821 | -1.341073 | H  | 5.793958  | 4.689930  | -2.988642 |
| C | 3.406012  | -1.614044 | 1.789348  | C  | 4.055317  | 4.824481  | -1.679883 |
| H | 3.984142  | -0.682916 | 1.785323  | H  | 2.127085  | 4.065716  | -2.261810 |
| H | 2.355845  | -1.349271 | 1.947717  | H  | 2.213239  | 4.497232  | -0.577039 |
| H | 3.726926  | -2.212082 | 2.647097  | H  | 4.639346  | 4.959748  | -0.757747 |
| C | -2.924668 | 2.539038  | 0.063564  | H  | 3.782566  | 5.827299  | -2.030841 |
| C | -3.887399 | 2.067577  | 0.985625  | Ni | -1.711337 | -1.722367 | 0.290425  |
| C | -3.333573 | 2.896137  | -1.242527 | H  | -4.747136 | -3.983618 | 0.718451  |
| C | -5.220510 | 1.933427  | 0.577838  | C  | 1.594697  | -3.539148 | 4.796087  |
| C | -4.677772 | 2.753522  | -1.602388 | C  | 1.139258  | -2.236638 | 5.009398  |
| C | -5.639011 | 2.266116  | -0.712333 | C  | 0.124077  | -1.707808 | 4.212782  |
| H | -5.951668 | 1.562540  | 1.294273  | C  | -0.465668 | -2.461084 | 3.180628  |
| H | -4.982625 | 3.041390  | -2.606926 | C  | 0.021772  | -3.765024 | 2.965873  |
| C | -2.359796 | 3.457834  | -2.253509 | C  | 1.029853  | -4.297674 | 3.765984  |
| H | -1.739077 | 4.249249  | -1.818636 | H  | 2.381475  | -3.956604 | 5.418772  |
| H | -1.681391 | 2.680657  | -2.621709 | H  | 1.569996  | -1.631165 | 5.803204  |
| H | -2.892909 | 3.877156  | -3.112723 | H  | -0.232341 | -0.696559 | 4.396990  |
| C | -3.535539 | 1.719189  | 2.417615  | H  | -0.385199 | -4.360864 | 2.153319  |
| H | -2.526314 | 1.309322  | 2.506183  | H  | 1.382515  | -5.309319 | 3.579663  |
| H | -3.578245 | 2.601280  | 3.069901  | C  | -1.571248 | -1.877449 | 2.394678  |
| H | -4.242474 | 0.987444  | 2.823031  | H  | -1.782899 | -0.834283 | 2.629481  |
| C | -7.076972 | 2.081933  | -1.138657 | C  | -2.601711 | -2.645049 | 1.820105  |
| H | -7.249841 | 1.067106  | -1.521756 | H  | -2.529219 | -3.733233 | 1.861276  |
| H | -7.766999 | 2.233625  | -0.301361 | C  | -3.679917 | -2.104980 | 0.999020  |
| H | -7.351537 | 2.781536  | -1.935591 | H  | -3.897549 | -1.048238 | 1.171905  |
| C | 0.220825  | 4.885176  | 3.154467  | C  | -4.958685 | -2.933639 | 0.944057  |
| C | 1.676289  | 5.272170  | 3.435539  | H  | -5.652517 | -2.556370 | 0.187644  |
| C | 2.558240  | 4.022510  | 3.385098  | H  | -5.451582 | -2.894227 | 1.925224  |
| C | 2.549101  | 3.425661  | 1.971766  | C  | -3.247285 | -2.095585 | -0.924388 |
| H | 3.589746  | 4.255516  | 3.675711  | C  | -3.880414 | -1.084435 | -1.675077 |
| H | 2.026193  | 5.993205  | 2.682858  | C  | -3.164418 | -3.381849 | -1.497481 |
| H | 1.748670  | 5.770983  | 4.409495  | C  | -4.362740 | -1.338763 | -2.959232 |
| H | -0.197624 | 4.408865  | 4.054343  | H  | -3.982209 | -0.087202 | -1.256707 |
| H | -0.390421 | 5.780646  | 2.981137  | C  | -3.634344 | -3.633862 | -2.788397 |
| H | 3.146912  | 4.078696  | 1.321363  | H  | -2.728753 | -4.200147 | -0.924743 |
| H | 3.061036  | 2.456999  | 1.965508  | C  | -4.237465 | -2.612085 | -3.526143 |

|   |           |           |           |   |           |          |          |
|---|-----------|-----------|-----------|---|-----------|----------|----------|
| H | -4.834255 | -0.536295 | -3.522634 | C | -2.181674 | 7.061762 | 0.299852 |
| H | -3.542810 | -4.631624 | -3.212658 | H | -2.770650 | 7.430550 | 1.147691 |
| H | -4.619338 | -2.808450 | -4.524787 | H | -1.124113 | 7.220191 | 0.550684 |

### IM8a

SCF energy in Ethanol: -2889.920854 a.u.

Free energy in Ethanol: -2888.976885 a.u.

|   |           |           |           |   |           |           |           |
|---|-----------|-----------|-----------|---|-----------|-----------|-----------|
| P | 0.368135  | 0.432767  | -0.726538 | H | -3.912447 | 1.754882  | 1.877572  |
| N | 0.238150  | 1.067895  | -2.279237 | H | -2.167021 | 1.751167  | 2.152699  |
| C | 0.939170  | 2.307569  | -2.599748 | H | -3.178637 | 2.973819  | 2.933373  |
| H | 1.630990  | 2.151294  | -3.437901 | C | 1.862898  | -3.246424 | -0.267685 |
| H | 0.228411  | 3.101559  | -2.867781 | C | 2.953766  | -3.001578 | 0.596433  |
| H | 1.523436  | 2.641347  | -1.738133 | C | 2.102164  | -3.716423 | -1.577505 |
| C | -0.462391 | 0.467203  | -3.410034 | C | 4.255921  | -3.216974 | 0.129838  |
| H | -1.066001 | -0.377718 | -3.083670 | C | 3.420587  | -3.923093 | -1.999804 |
| H | -1.115932 | 1.206123  | -3.889661 | C | 4.514048  | -3.673802 | -1.165759 |
| H | 0.259041  | 0.113219  | -4.161676 | H | 5.091254  | -3.024912 | 0.800988  |
| O | 0.067948  | -1.165012 | -1.188605 | H | 3.595387  | -4.297938 | -3.006859 |
| O | -1.064406 | 0.734257  | 0.124289  | C | 0.964077  | -4.019334 | -2.525983 |
| C | -0.400589 | -2.071773 | -0.249309 | H | 0.208978  | -4.661325 | -2.058072 |
| C | -1.738526 | -1.981917 | 0.158220  | H | 0.455229  | -3.100593 | -2.839704 |
| C | 0.459799  | -3.076200 | 0.224672  | H | 1.331273  | -4.525960 | -3.424313 |
| C | -2.200328 | -2.816068 | 1.208110  | C | 2.749821  | -2.507137 | 2.012582  |
| C | -2.639060 | -0.971835 | -0.484722 | H | 2.086657  | -1.635365 | 2.046190  |
| C | -0.060557 | -3.950535 | 1.181251  | H | 2.298270  | -3.272368 | 2.655074  |
| C | -1.349482 | -3.817134 | 1.709116  | H | 3.707389  | -2.223448 | 2.461844  |
| C | -2.305577 | 0.389610  | -0.385711 | C | 5.930616  | -3.865767 | -1.655925 |
| C | -3.824642 | -1.345844 | -1.163741 | H | 5.978508  | -4.602055 | -2.465532 |
| H | 0.576670  | -4.751532 | 1.550496  | H | 6.345971  | -2.925645 | -2.043675 |
| C | -3.209062 | 1.406288  | -0.749798 | H | 6.592430  | -4.203486 | -0.850705 |
| C | -4.724938 | -0.344632 | -1.570024 | C | -1.762447 | -4.742446 | 2.844550  |
| C | -4.420097 | 0.996672  | -1.314861 | C | -3.260150 | -4.697788 | 3.164566  |
| C | -2.936645 | 2.857212  | -0.500587 | C | -3.734473 | -3.242877 | 3.203722  |
| C | -2.834346 | 3.776464  | -1.565608 | C | -3.578932 | -2.598810 | 1.820175  |
| C | -2.848923 | 3.328470  | 0.832779  | H | -4.782556 | -3.178252 | 3.520343  |
| C | -2.589792 | 5.128210  | -1.285374 | H | -3.825778 | -5.243005 | 2.395252  |
| C | -2.617671 | 4.686217  | 1.064377  | H | -3.453160 | -5.204363 | 4.117955  |
| C | -2.468446 | 5.604711  | 0.019026  | H | -1.200406 | -4.458317 | 3.747245  |
| H | -2.500655 | 5.826096  | -2.116467 | H | -1.449322 | -5.768384 | 2.609933  |
| H | -2.565662 | 5.040142  | 2.092729  | H | -4.356577 | -3.011413 | 1.162450  |
| C | -3.013822 | 3.372629  | -3.013993 | H | -3.782621 | -1.523766 | 1.877709  |
| H | -4.047907 | 3.537607  | -3.346615 | H | -3.143459 | -2.686339 | 3.944596  |
| H | -2.370623 | 3.971975  | -3.668218 | H | -5.146085 | 1.759618  | -1.588070 |
| H | -2.790548 | 2.317752  | -3.179735 | C | -6.054976 | -0.677168 | -2.231792 |
|   |           |           |           | H | -6.850600 | -0.611443 | -1.473169 |
|   |           |           |           | H | -6.294042 | 0.089037  | -2.980068 |

|    |           |           |           |                                           |           |           |           |
|----|-----------|-----------|-----------|-------------------------------------------|-----------|-----------|-----------|
| C  | -4.068222 | -2.796252 | -1.562766 | SCF energy in Ethanol: -2889.916340 a.u.  |           |           |           |
| C  | -6.096192 | -2.072655 | -2.864463 | Free energy in Ethanol: -2888.973396 a.u. |           |           |           |
| H  | -5.497283 | -2.082673 | -3.786337 | P                                         | 0.247707  | 0.302854  | -0.474272 |
| H  | -7.124945 | -2.321042 | -3.152688 | N                                         | 0.306396  | 0.894801  | -2.037381 |
| C  | -5.533490 | -3.109128 | -1.887883 | C                                         | 1.040461  | 2.133017  | -2.294443 |
| H  | -3.461423 | -2.997292 | -2.460050 | H                                         | 1.763045  | 1.980107  | -3.104856 |
| H  | -3.688804 | -3.483528 | -0.804055 | H                                         | 0.351759  | 2.943930  | -2.569152 |
| H  | -6.130686 | -3.101463 | -0.964344 | H                                         | 1.589257  | 2.434638  | -1.398892 |
| H  | -5.609345 | -4.120785 | -2.305052 | C                                         | -0.349190 | 0.333644  | -3.215079 |
| Ni | 2.130035  | 0.944704  | 0.356032  | H                                         | -0.932416 | -0.544895 | -2.945894 |
| C  | 0.098070  | 1.238457  | 5.525974  | H                                         | -1.013276 | 1.075279  | -3.677093 |
| C  | -0.322723 | 2.278968  | 4.695833  | H                                         | 0.409356  | 0.042815  | -3.955076 |
| C  | 0.375572  | 2.573094  | 3.525474  | O                                         | -0.234780 | -1.256698 | -0.890078 |
| C  | 1.515118  | 1.838927  | 3.146909  | O                                         | -1.166681 | 0.822385  | 0.299945  |
| C  | 1.927253  | 0.795195  | 3.998748  | C                                         | -0.809480 | -2.054640 | 0.092102  |
| C  | 1.228696  | 0.499426  | 5.167284  | C                                         | -2.130866 | -1.791595 | 0.481087  |
| H  | -0.442759 | 1.009051  | 6.440237  | C                                         | -0.069066 | -3.119490 | 0.633275  |
| H  | -1.197335 | 2.867817  | 4.961318  | C                                         | -2.685648 | -2.503598 | 1.575302  |
| H  | 0.035548  | 3.383024  | 2.884135  | C                                         | -2.915799 | -0.729870 | -0.226105 |
| H  | 2.807288  | 0.210044  | 3.749513  | C                                         | -0.688679 | -3.871917 | 1.633730  |
| H  | 1.574076  | -0.310345 | 5.805807  | C                                         | -1.955331 | -3.563287 | 2.141597  |
| C  | 2.241461  | 2.224387  | 1.915906  | C                                         | -2.433044 | 0.588906  | -0.208602 |
| H  | 1.921462  | 3.185776  | 1.507392  | C                                         | -4.138854 | -1.010223 | -0.882468 |
| C  | 3.505583  | 1.740708  | 1.521856  | H                                         | -0.147740 | -4.717921 | 2.052502  |
| H  | 3.982277  | 0.975820  | 2.139447  | C                                         | -3.209042 | 1.676867  | -0.651410 |
| C  | 4.460019  | 2.501202  | 0.604414  | C                                         | -4.923726 | 0.059746  | -1.349054 |
| H  | 4.076289  | 3.524792  | 0.487682  | C                                         | -4.463721 | 1.370880  | -1.187159 |
| C  | 5.874982  | 2.601041  | 1.211089  | C                                         | -2.749215 | 3.096979  | -0.542325 |
| H  | 5.839029  | 3.097498  | 2.187629  | C                                         | -2.592806 | 3.894382  | -1.698641 |
| H  | 6.305160  | 1.601931  | 1.352491  | C                                         | -2.516077 | 3.671711  | 0.731158  |
| C  | 4.500517  | 1.885973  | -0.798573 | C                                         | -2.164699 | 5.221600  | -1.564524 |
| C  | 4.935005  | 2.639775  | -1.898109 | C                                         | -2.103475 | 5.004075  | 0.815308  |
| C  | 4.067652  | 0.566728  | -1.031852 | C                                         | -1.906245 | 5.795945  | -0.319870 |
| C  | 4.951668  | 2.096704  | -3.183794 | H                                         | -2.036452 | 5.822366  | -2.463481 |
| H  | 5.260293  | 3.666761  | -1.743576 | H                                         | -1.935433 | 5.436418  | 1.799994  |
| C  | 4.078976  | 0.018214  | -2.321757 | C                                         | -2.896431 | 3.385385  | -3.093130 |
| H  | 3.808835  | -0.088426 | -0.187164 | H                                         | -3.947425 | 3.557001  | -3.362549 |
| C  | 4.520795  | 0.783736  | -3.400552 | H                                         | -2.287425 | 3.910712  | -3.836906 |
| H  | 5.297919  | 2.700377  | -4.019240 | H                                         | -2.716453 | 2.313086  | -3.194381 |
| H  | 3.743311  | -1.004280 | -2.467689 | C                                         | -1.418199 | 7.221079  | -0.199446 |
| H  | 4.531550  | 0.362948  | -4.402623 | H                                         | -1.843287 | 7.717460  | 0.680293  |
| H  | 6.552307  | 3.166506  | 0.560625  | H                                         | -0.325430 | 7.260859  | -0.094973 |
|    |           |           |           | H                                         | -1.682667 | 7.812303  | -1.082739 |
|    |           |           |           | C                                         | -2.728906 | 2.893670  | 2.010307  |

**IM8b**

|   |           |           |           |                                           |           |           |           |
|---|-----------|-----------|-----------|-------------------------------------------|-----------|-----------|-----------|
| H | -3.668128 | 2.329364  | 1.988564  | H                                         | -3.972593 | -2.762485 | -2.081225 |
| H | -1.919994 | 2.173579  | 2.174575  | H                                         | -4.236910 | -3.126268 | -0.399149 |
| H | -2.758982 | 3.569290  | 2.870971  | H                                         | -6.623976 | -2.485738 | -0.575456 |
| C | 1.305937  | -3.483026 | 0.166925  | H                                         | -6.229057 | -3.631347 | -1.855738 |
| C | 2.414232  | -3.321296 | 1.026248  | Ni                                        | 1.901477  | 0.675155  | 0.816079  |
| C | 1.490135  | -4.062112 | -1.108576 | H                                         | 6.470378  | 1.612017  | -0.132181 |
| C | 3.681389  | -3.730163 | 0.591251  | C                                         | 2.151619  | 4.077180  | 4.691775  |
| C | 2.772438  | -4.460416 | -1.499582 | C                                         | 2.337558  | 2.748339  | 5.078018  |
| C | 3.885097  | -4.299867 | -0.667995 | C                                         | 2.784044  | 1.804565  | 4.154961  |
| H | 4.530808  | -3.602767 | 1.259967  | C                                         | 3.058139  | 2.155874  | 2.816595  |
| H | 2.903686  | -4.916009 | -2.479547 | C                                         | 2.869395  | 3.504563  | 2.447420  |
| C | 0.326774  | -4.279023 | -2.050007 | C                                         | 2.422839  | 4.446577  | 3.370733  |
| H | -0.498548 | -4.806231 | -1.557703 | H                                         | 1.805446  | 4.816097  | 5.409298  |
| H | -0.072073 | -3.324869 | -2.412954 | H                                         | 2.137841  | 2.444747  | 6.102796  |
| H | 0.635187  | -4.868648 | -2.919269 | H                                         | 2.932193  | 0.772950  | 4.467865  |
| C | 2.269738  | -2.718286 | 2.407379  | H                                         | 3.083942  | 3.819255  | 1.430171  |
| H | 1.704142  | -1.779186 | 2.379428  | H                                         | 2.290121  | 5.479339  | 3.057630  |
| H | 1.741559  | -3.387439 | 3.097161  | C                                         | 3.507454  | 1.106271  | 1.881733  |
| H | 3.253058  | -2.507674 | 2.840060  | H                                         | 3.842436  | 0.184987  | 2.366664  |
| C | 5.265865  | -4.703460 | -1.130812 | C                                         | 3.784903  | 1.251400  | 0.508780  |
| H | 5.727930  | -3.910274 | -1.733924 | H                                         | 3.750262  | 2.249725  | 0.065731  |
| H | 5.931802  | -4.899826 | -0.283801 | C                                         | 4.711417  | 0.288660  | -0.233052 |
| H | 5.233068  | -5.604876 | -1.753051 | H                                         | 4.493205  | -0.728691 | 0.114113  |
| C | -2.475693 | -4.372085 | 3.321394  | C                                         | 6.188458  | 0.583827  | 0.122449  |
| C | -3.958224 | -4.134597 | 3.626083  | H                                         | 6.863311  | -0.093925 | -0.413643 |
| C | -4.257904 | -2.634674 | 3.581731  | H                                         | 6.348931  | 0.457553  | 1.198453  |
| C | -4.029981 | -2.092477 | 2.164970  | C                                         | 4.474553  | 0.313621  | -1.739434 |
| H | -5.290538 | -2.429620 | 3.888983  | C                                         | 3.816256  | -0.751164 | -2.370006 |
| H | -4.582865 | -4.651025 | 2.883119  | C                                         | 4.905023  | 1.387239  | -2.534101 |
| H | -4.210997 | -4.561821 | 4.603909  | C                                         | 3.600122  | -0.749203 | -3.750221 |
| H | -1.885551 | -4.109305 | 4.212572  | H                                         | 3.467584  | -1.589962 | -1.773755 |
| H | -2.284675 | -5.438431 | 3.142546  | C                                         | 4.690361  | 1.394746  | -3.913933 |
| H | -4.850840 | -2.448058 | 1.527043  | H                                         | 5.421356  | 2.227172  | -2.075872 |
| H | -4.106329 | -0.999428 | 2.159172  | C                                         | 4.037742  | 0.323815  | -4.529541 |
| H | -3.604865 | -2.110658 | 4.293946  | H                                         | 3.094510  | -1.592332 | -4.214603 |
| H | -5.098668 | 2.190980  | -1.515092 | H                                         | 5.039462  | 2.235274  | -4.508968 |
| C | -6.289354 | -0.160716 | -1.984386 | H                                         | 3.878054  | 0.324093  | -5.604846 |
| H | -7.064429 | 0.038900  | -1.228048 |                                           |           |           |           |
| H | -6.449436 | 0.581423  | -2.776653 |                                           |           |           |           |
| C | -4.544995 | -2.445187 | -1.195031 | <b>TS3c</b>                               |           |           |           |
| C | -6.491477 | -1.577797 | -2.532481 | SCF energy in Ethanol: -3455.868311 a.u.  |           |           |           |
| H | -5.905501 | -1.708073 | -3.453398 | Free energy in Ethanol: -3454.690591 a.u. |           |           |           |
| H | -7.543984 | -1.726450 | -2.802980 | P                                         | 0.803358  | 0.283937  | 0.612964  |
| C | -6.038620 | -2.612018 | -1.498075 | N                                         | 1.277594  | 1.190889  | 1.940234  |
|   |           |           |           | C                                         | 0.879331  | 2.603393  | 1.981835  |

|   |           |           |           |    |           |           |           |
|---|-----------|-----------|-----------|----|-----------|-----------|-----------|
| H | 0.692470  | 2.891519  | 3.022516  | C  | -0.211283 | -3.699938 | 2.735382  |
| H | 1.659063  | 3.255828  | 1.569691  | C  | -2.636659 | -4.321967 | 1.500477  |
| H | -0.043307 | 2.759904  | 1.423462  | C  | -1.353028 | -3.989202 | 3.489895  |
| C | 2.365620  | 0.851725  | 2.858544  | C  | -2.580473 | -4.291287 | 2.895691  |
| H | 2.580124  | -0.214703 | 2.817348  | H  | -3.575868 | -4.576800 | 1.012358  |
| H | 3.283800  | 1.406464  | 2.625392  | H  | -1.275147 | -3.987957 | 4.575614  |
| H | 2.057604  | 1.110325  | 3.879784  | C  | 1.087251  | -3.424279 | 3.460431  |
| O | 1.215132  | -1.206683 | 1.250196  | H  | 1.927813  | -3.957586 | 3.002887  |
| O | 1.928370  | 0.438462  | -0.628535 | H  | 1.334720  | -2.357135 | 3.443858  |
| C | 1.669471  | -2.277988 | 0.487719  | H  | 1.017533  | -3.736201 | 4.507401  |
| C | 2.888937  | -2.162004 | -0.196903 | C  | -1.668004 | -4.168675 | -0.800293 |
| C | 0.932117  | -3.478735 | 0.494752  | H  | -1.082129 | -3.419455 | -1.338901 |
| C | 3.282739  | -3.192062 | -1.090979 | H  | -1.334680 | -5.150084 | -1.161621 |
| C | 3.770223  | -0.962332 | -0.016090 | H  | -2.716378 | -4.062149 | -1.096679 |
| C | 1.423110  | -4.517210 | -0.300670 | C  | -3.809012 | -4.563200 | 3.732309  |
| C | 2.541870  | -4.384742 | -1.128161 | H  | -4.392055 | -3.646049 | 3.892708  |
| C | 3.288828  | 0.303299  | -0.379441 | H  | -4.473403 | -5.286827 | 3.247294  |
| C | 5.102589  | -1.084636 | 0.451213  | H  | -3.543220 | -4.955328 | 4.719885  |
| H | 0.890998  | -5.465188 | -0.291960 | C  | 2.894936  | -5.536445 | -2.057411 |
| C | 4.137477  | 1.416107  | -0.533816 | C  | 4.282271  | -5.410162 | -2.694669 |
| C | 5.959174  | 0.027387  | 0.362466  | C  | 4.486429  | -3.980156 | -3.200229 |
| C | 5.476013  | 1.224923  | -0.176471 | C  | 4.472357  | -2.994977 | -2.023942 |
| C | 3.681545  | 2.725600  | -1.097739 | H  | 5.434794  | -3.885069 | -3.742563 |
| C | 3.818284  | 3.923075  | -0.360599 | H  | 5.060126  | -5.648161 | -1.954919 |
| C | 3.178505  | 2.783304  | -2.422736 | H  | 4.386605  | -6.137350 | -3.508737 |
| C | 3.409616  | 5.134462  | -0.936185 | H  | 2.141141  | -5.582589 | -2.858076 |
| C | 2.794296  | 4.015094  | -2.955986 | H  | 2.805630  | -6.484140 | -1.510402 |
| C | 2.889739  | 5.205810  | -2.227501 | H  | 5.413897  | -3.109977 | -1.469953 |
| H | 3.508469  | 6.047859  | -0.352628 | H  | 4.474478  | -1.963641 | -2.394314 |
| H | 2.419885  | 4.047242  | -3.977633 | H  | 3.687455  | -3.727130 | -3.911456 |
| C | 4.420272  | 3.974304  | 1.029301  | H  | 6.165577  | 2.056219  | -0.302860 |
| H | 5.503083  | 4.154913  | 0.989375  | C  | 7.422279  | -0.047461 | 0.776073  |
| H | 3.981696  | 4.793432  | 1.609041  | H  | 8.037475  | -0.159676 | -0.130185 |
| H | 4.274033  | 3.045632  | 1.584587  | H  | 7.725365  | 0.906882  | 1.224754  |
| C | 2.444620  | 6.519651  | -2.827127 | C  | 5.573809  | -2.359419 | 1.141191  |
| H | 2.806983  | 7.370511  | -2.241075 | C  | 7.732580  | -1.207620 | 1.728040  |
| H | 2.811341  | 6.635865  | -3.853883 | H  | 7.331581  | -0.987848 | 2.727631  |
| H | 1.349649  | 6.590148  | -2.868027 | H  | 8.817978  | -1.317997 | 1.839411  |
| C | 3.088702  | 1.553746  | -3.299424 | C  | 7.099308  | -2.499303 | 1.204171  |
| H | 4.016391  | 0.970323  | -3.272427 | H  | 5.182366  | -2.340272 | 2.170816  |
| H | 2.279340  | 0.889088  | -2.979383 | H  | 5.127339  | -3.244494 | 0.683042  |
| H | 2.900121  | 1.837546  | -4.339582 | H  | 7.495942  | -2.718636 | 0.202103  |
| C | -0.293000 | -3.710534 | 1.323200  | H  | 7.363269  | -3.351581 | 1.841956  |
| C | -1.518942 | -4.049904 | 0.702860  | Ni | -1.157955 | 0.597848  | -0.234164 |

|   |           |           |           |                                           |           |           |           |
|---|-----------|-----------|-----------|-------------------------------------------|-----------|-----------|-----------|
| C | -7.456686 | -3.848288 | -2.803882 | C                                         | -2.250008 | 6.380177  | 1.766381  |
| C | -7.265138 | -2.999510 | -3.895459 | H                                         | -3.676132 | 4.871800  | 2.342439  |
| C | -6.256373 | -2.037576 | -3.866837 | C                                         | -0.766011 | 5.782718  | -0.037991 |
| C | -5.407043 | -1.900779 | -2.753339 | H                                         | -1.047281 | 3.830030  | -0.882277 |
| C | -5.626822 | -2.753449 | -1.653186 | C                                         | -1.197538 | 6.712821  | 0.911182  |
| C | -6.633008 | -3.716041 | -1.681898 | H                                         | -2.600217 | 7.100783  | 2.502777  |
| H | -8.244319 | -4.596657 | -2.821050 | H                                         | 0.055826  | 6.026328  | -0.707483 |
| H | -7.903122 | -3.084864 | -4.771497 | H                                         | -0.721106 | 7.688302  | 0.979751  |
| H | -6.112439 | -1.382629 | -4.723462 | O                                         | -3.369750 | 2.301527  | -0.792216 |
| H | -5.019387 | -2.644233 | -0.759127 | H                                         | -2.714905 | 1.271813  | -1.180506 |
| H | -6.785051 | -4.358942 | -0.818332 | C                                         | -4.463865 | 2.830859  | -1.553088 |
| C | -4.343615 | -0.886711 | -2.782235 | H                                         | -5.023931 | 1.982362  | -1.962936 |
| H | -4.446819 | -0.130287 | -3.562076 | H                                         | -5.123917 | 3.354847  | -0.855063 |
| C | -3.259665 | -0.833315 | -1.984672 | C                                         | -3.991039 | 3.760188  | -2.665007 |
| H | -3.112343 | -1.610191 | -1.235182 | H                                         | -3.333387 | 3.234775  | -3.367548 |
| C | -2.205496 | 0.210862  | -2.033925 | H                                         | -4.851934 | 4.141509  | -3.228039 |
| H | -2.353455 | 0.923047  | -2.855438 | H                                         | -3.440750 | 4.609345  | -2.249947 |
| C | -0.799766 | -0.208302 | -1.888287 |                                           |           |           |           |
| H | -0.063147 | 0.325369  | -2.490318 |                                           |           |           |           |
| H | -0.588330 | -1.278456 | -1.832645 |                                           |           |           |           |
| B | -3.135301 | 2.706395  | 0.677101  | <b>TS3d</b>                               |           |           |           |
| O | -2.262773 | 1.553914  | 1.157992  | SCF energy in Ethanol: -3455.863518 a.u.  |           |           |           |
| O | -4.323093 | 2.629109  | 1.480726  | Free energy in Ethanol: -3454.687199 a.u. |           |           |           |
| C | -2.894799 | 0.971203  | 2.340301  | P                                         | -0.722423 | 0.167509  | 0.836263  |
| C | -4.406927 | 1.367210  | 2.139445  | N                                         | -0.777719 | -0.030734 | 2.500119  |
| C | -2.262640 | 1.639104  | 3.570739  | C                                         | 0.377713  | -0.670936 | 3.143366  |
| H | -2.415962 | 2.721521  | 3.555783  | H                                         | 0.504664  | -0.251864 | 4.147838  |
| H | -2.678205 | 1.237534  | 4.501414  | H                                         | 0.242589  | -1.756828 | 3.227583  |
| H | -1.186844 | 1.441186  | 3.568379  | H                                         | 1.292118  | -0.470888 | 2.583765  |
| C | -2.637360 | -0.532409 | 2.389759  | C                                         | -1.992420 | -0.038480 | 3.316509  |
| H | -3.181689 | -0.980024 | 3.229875  | H                                         | -2.802543 | 0.472007  | 2.799007  |
| H | -2.956356 | -1.038579 | 1.475697  | H                                         | -2.313412 | -1.059422 | 3.559598  |
| H | -1.574117 | -0.741224 | 2.541011  | H                                         | -1.787620 | 0.489158  | 4.256793  |
| C | -5.181287 | 0.373888  | 1.252103  | O                                         | -2.109118 | 1.097911  | 0.714164  |
| H | -6.156571 | 0.811333  | 1.013861  | O                                         | -1.200294 | -1.248689 | 0.066136  |
| H | -4.664620 | 0.179117  | 0.309376  | C                                         | -2.859651 | 1.149048  | -0.458051 |
| H | -5.354007 | -0.581876 | 1.760500  | C                                         | -3.527087 | -0.009787 | -0.882793 |
| C | -5.180210 | 1.568349  | 3.448144  | C                                         | -2.989230 | 2.375116  | -1.139086 |
| H | -5.207598 | 0.649866  | 4.047188  | C                                         | -4.139056 | -0.025104 | -2.162763 |
| H | -4.743212 | 2.368400  | 4.050206  | C                                         | -3.591474 | -1.224297 | -0.005162 |
| H | -6.212943 | 1.850101  | 3.216559  | C                                         | -3.697616 | 2.344866  | -2.343614 |
| C | -2.440230 | 4.165706  | 0.734544  | C                                         | -4.218613 | 1.170707  | -2.896322 |
| C | -2.854425 | 5.123304  | 1.676736  | C                                         | -2.403874 | -1.878883 | 0.351291  |
| C | -1.388789 | 4.534900  | -0.125014 | C                                         | -4.830171 | -1.757695 | 0.430531  |
|   |           |           |           | H                                         | -3.831515 | 3.279678  | -2.882743 |
|   |           |           |           | C                                         | -2.395755 | -3.163084 | 0.928260  |

|   |           |           |           |    |           |           |           |
|---|-----------|-----------|-----------|----|-----------|-----------|-----------|
| C | -4.847462 | -3.019519 | 1.051243  | C  | -4.870494 | -1.266820 | -4.269935 |
| C | -3.644765 | -3.709045 | 1.239171  | C  | -4.673854 | -1.326472 | -2.749472 |
| C | -1.144684 | -3.951602 | 1.160256  | H  | -5.391042 | -2.171922 | -4.605185 |
| C | -0.783341 | -4.377808 | 2.457316  | H  | -6.613711 | -0.002038 | -4.116879 |
| C | -0.348582 | -4.347199 | 0.055200  | H  | -5.887710 | 0.002866  | -5.723406 |
| C | 0.382775  | -5.136717 | 2.630856  | H  | -4.031966 | 1.360819  | -5.020964 |
| C | 0.797074  | -5.113682 | 0.276905  | H  | -5.457387 | 2.139842  | -4.362892 |
| C | 1.191388  | -5.511514 | 1.559329  | H  | -5.638777 | -1.580300 | -2.289751 |
| H | 0.657919  | -5.446881 | 3.637219  | H  | -3.998032 | -2.147622 | -2.485834 |
| H | 1.393456  | -5.420792 | -0.580450 | H  | -3.894301 | -1.256840 | -4.775050 |
| C | -1.620773 | -4.083627 | 3.685639  | H  | -3.676841 | -4.708640 | 1.666529  |
| H | -2.332565 | -4.896138 | 3.885405  | C  | -6.145888 | -3.691934 | 1.473635  |
| H | -0.986082 | -3.990469 | 4.573346  | H  | -6.418774 | -4.437096 | 0.710338  |
| H | -2.206593 | -3.167905 | 3.584892  | H  | -5.980620 | -4.259653 | 2.397871  |
| C | 2.448882  | -6.323177 | 1.767341  | C  | -6.110553 | -0.936289 | 0.336336  |
| H | 3.349009  | -5.715222 | 1.607035  | C  | -7.314752 | -2.716512 | 1.647805  |
| H | 2.501262  | -6.726509 | 2.783727  | H  | -7.174842 | -2.125984 | 2.564352  |
| H | 2.502990  | -7.165022 | 1.066652  | H  | -8.250835 | -3.274555 | 1.770309  |
| C | -0.731376 | -4.003395 | -1.367381 | C  | -7.391889 | -1.771620 | 0.445525  |
| H | -1.786693 | -4.225161 | -1.564464 | H  | -6.095782 | -0.209523 | 1.164008  |
| H | -0.579845 | -2.939808 | -1.579864 | H  | -6.126317 | -0.331970 | -0.573116 |
| H | -0.128025 | -4.577524 | -2.077516 | H  | -7.532276 | -2.361276 | -0.472233 |
| C | -2.496070 | 3.689331  | -0.616943 | H  | -8.258173 | -1.103928 | 0.527050  |
| C | -1.569287 | 4.458358  | -1.355152 | Ni | 1.126095  | 0.786616  | -0.095821 |
| C | -3.049722 | 4.225734  | 0.571900  | C  | 6.239146  | -3.257514 | -5.481874 |
| C | -1.199244 | 5.724902  | -0.883171 | C  | 6.112507  | -1.976955 | -6.021886 |
| C | -2.652128 | 5.494111  | 1.001108  | C  | 5.303638  | -1.029674 | -5.395568 |
| C | -1.726424 | 6.264352  | 0.289900  | C  | 4.596965  | -1.332538 | -4.216900 |
| H | -0.475985 | 6.303855  | -1.454584 | C  | 4.742096  | -2.628567 | -3.683013 |
| H | -3.088705 | 5.896738  | 1.913521  | C  | 5.549144  | -3.575354 | -4.307732 |
| C | -4.089752 | 3.479080  | 1.377182  | H  | 6.870594  | -3.998296 | -5.964819 |
| H | -4.887412 | 3.081838  | 0.739381  | H  | 6.645063  | -1.712931 | -6.932103 |
| H | -3.648945 | 2.629130  | 1.909645  | H  | 5.210567  | -0.034116 | -5.824333 |
| H | -4.547922 | 4.139334  | 2.120242  | H  | 4.225634  | -2.895873 | -2.765418 |
| C | -0.961191 | 3.976900  | -2.656137 | H  | 5.645701  | -4.567082 | -3.872827 |
| H | -0.806026 | 2.895730  | -2.666223 | C  | 3.755326  | -0.293359 | -3.606365 |
| H | -1.601041 | 4.214684  | -3.516099 | H  | 3.831737  | 0.689051  | -4.075760 |
| H | 0.004654  | 4.462461  | -2.831797 | C  | 2.907675  | -0.430929 | -2.571074 |
| C | -1.334773 | 7.643881  | 0.767041  | H  | 2.786542  | -1.402676 | -2.092535 |
| H | -1.114690 | 7.650265  | 1.841075  | C  | 2.050497  | 0.655386  | -2.014079 |
| H | -0.449881 | 8.013607  | 0.238948  | H  | 2.198609  | 1.611591  | -2.528692 |
| H | -2.143662 | 8.367916  | 0.601429  | C  | 0.633310  | 0.286940  | -1.826161 |
| C | -4.839468 | 1.235947  | -4.283482 | H  | -0.120821 | 0.951590  | -2.253073 |
| C | -5.653476 | -0.008441 | -4.652266 | H  | 0.373628  | -0.763089 | -1.966602 |

|                                          |           |           |           |                                           |           |           |           |
|------------------------------------------|-----------|-----------|-----------|-------------------------------------------|-----------|-----------|-----------|
| B                                        | 3.754821  | 1.322912  | 1.329697  | Free energy in Ethanol: -3454.692269 a.u. |           |           |           |
| O                                        | 2.258391  | 1.608657  | 1.346598  | P                                         | -0.135694 | 0.242528  | -0.552796 |
| O                                        | 4.367946  | 2.557207  | 1.741042  | N                                         | 0.227608  | 0.912412  | -2.042940 |
| C                                        | 2.059927  | 2.914709  | 1.975418  | C                                         | 1.474462  | 1.663817  | -2.209965 |
| C                                        | 3.429937  | 3.629111  | 1.681148  | H                                         | 1.964414  | 1.359987  | -3.142268 |
| C                                        | 1.825126  | 2.674806  | 3.474165  | H                                         | 1.283278  | 2.743552  | -2.243938 |
| H                                        | 2.677109  | 2.167875  | 3.934491  | H                                         | 2.166449  | 1.454377  | -1.396137 |
| H                                        | 1.646795  | 3.617089  | 4.003817  | C                                         | -0.674707 | 1.014809  | -3.189576 |
| H                                        | 0.939219  | 2.045633  | 3.597125  | H                                         | -1.597872 | 0.469746  | -3.005994 |
| C                                        | 0.847536  | 3.619302  | 1.376319  | H                                         | -0.918496 | 2.062734  | -3.403835 |
| H                                        | 0.780066  | 4.644182  | 1.759487  | H                                         | -0.183483 | 0.590424  | -4.075672 |
| H                                        | 0.896339  | 3.672512  | 0.286659  | O                                         | -1.299352 | -0.823326 | -1.135907 |
| H                                        | -0.079592 | 3.108241  | 1.649794  | O                                         | -1.091383 | 1.295562  | 0.349896  |
| C                                        | 3.476764  | 4.283071  | 0.285202  | C                                         | -2.417477 | -1.243124 | -0.424077 |
| H                                        | 4.507575  | 4.590438  | 0.079481  | C                                         | -3.364482 | -0.298283 | 0.003601  |
| H                                        | 3.169719  | 3.584863  | -0.498346 | C                                         | -2.623521 | -2.625101 | -0.241332 |
| H                                        | 2.839697  | 5.172855  | 0.226532  | C                                         | -4.389310 | -0.702316 | 0.898395  |
| C                                        | 3.833931  | 4.671607  | 2.729784  | C                                         | -3.321005 | 1.117086  | -0.489084 |
| H                                        | 3.098986  | 5.482989  | 2.796525  | C                                         | -3.710375 | -2.994306 | 0.554918  |
| H                                        | 3.948587  | 4.218172  | 3.717046  | C                                         | -4.549380 | -2.068332 | 1.182619  |
| H                                        | 4.797546  | 5.110950  | 2.450249  | C                                         | -2.208804 | 1.915002  | -0.194328 |
| C                                        | 4.197412  | 0.057874  | 2.231908  | C                                         | -4.400473 | 1.681494  | -1.215134 |
| C                                        | 4.912181  | 0.235217  | 3.429094  | H                                         | -3.898558 | -4.054899 | 0.702897  |
| C                                        | 3.868100  | -1.263841 | 1.878606  | C                                         | -2.204519 | 3.308583  | -0.392685 |
| C                                        | 5.271726  | -0.844525 | 4.240608  | C                                         | -4.403468 | 3.065959  | -1.463469 |
| H                                        | 5.198102  | 1.243712  | 3.717488  | C                                         | -3.337297 | 3.849245  | -1.007487 |
| C                                        | 4.210090  | -2.351149 | 2.685948  | C                                         | -1.084890 | 4.191375  | 0.063209  |
| H                                        | 3.337827  | -1.448089 | 0.945015  | C                                         | -0.334361 | 4.953768  | -0.858254 |
| C                                        | 4.915481  | -2.143891 | 3.874126  | C                                         | -0.812856 | 4.315665  | 1.448093  |
| H                                        | 5.831161  | -0.672738 | 5.158043  | C                                         | 0.708298  | 5.764458  | -0.389128 |
| H                                        | 3.928810  | -3.358969 | 2.387651  | C                                         | 0.229807  | 5.144178  | 1.870110  |
| H                                        | 5.190086  | -2.987375 | 4.503622  | C                                         | 1.017816  | 5.866018  | 0.966716  |
| H                                        | 2.944294  | 0.908597  | -0.861407 | H                                         | 1.290191  | 6.335182  | -1.110656 |
| O                                        | 3.999270  | 1.008551  | -0.162831 | H                                         | 0.425556  | 5.235525  | 2.936768  |
| C                                        | 5.266548  | 1.309807  | -0.775795 | C                                         | -0.630683 | 4.970165  | -2.343548 |
| H                                        | 5.690448  | 2.168074  | -0.246797 | H                                         | -1.321697 | 5.784887  | -2.599746 |
| H                                        | 5.057544  | 1.610009  | -1.807134 | H                                         | 0.284964  | 5.135125  | -2.921316 |
| C                                        | 6.221168  | 0.123492  | -0.744855 | H                                         | -1.093351 | 4.043199  | -2.687044 |
| H                                        | 5.798896  | -0.732573 | -1.279464 | C                                         | 2.168514  | 6.719905  | 1.446407  |
| H                                        | 7.165716  | 0.398061  | -1.231185 | H                                         | 1.941687  | 7.196514  | 2.406694  |
| H                                        | 6.436766  | -0.177543 | 0.284176  | H                                         | 3.076446  | 6.118680  | 1.590561  |
|                                          |           |           |           | H                                         | 2.411110  | 7.507653  | 0.725390  |
| <b>TS3e</b>                              |           |           |           | C                                         | -1.658582 | 3.615011  | 2.488552  |
| SCF energy in Ethanol: -3455.869895 a.u. |           |           |           | H                                         | -2.727014 | 3.801894  | 2.327643  |



|   |           |           |           |    |           |           |           |
|---|-----------|-----------|-----------|----|-----------|-----------|-----------|
| H | -1.514402 | 2.529839  | 2.466139  | H  | -5.714681 | -0.047536 | -1.169508 |
| H | -1.401925 | 3.965012  | 3.493158  | H  | -7.305226 | 1.842524  | -1.282962 |
| C | -1.829269 | -3.698133 | -0.921263 | H  | -7.429080 | 0.889295  | -2.760340 |
| C | -1.127917 | -4.662084 | -0.164448 | Ni | 1.627354  | -0.203840 | 0.696712  |
| C | -1.888817 | -3.830445 | -2.329599 | B  | 4.490994  | -0.438245 | -0.394183 |
| C | -0.492556 | -5.721289 | -0.824368 | O  | 3.039288  | -0.846137 | -0.597802 |
| C | -1.236214 | -4.902980 | -2.944223 | O  | 5.257445  | -1.563456 | -0.849689 |
| C | -0.528677 | -5.861078 | -2.212432 | C  | 3.022664  | -2.130427 | -1.299080 |
| H | 0.047935  | -6.455978 | -0.230102 | C  | 4.436585  | -2.723721 | -0.941796 |
| H | -1.295964 | -4.999703 | -4.026869 | C  | 2.857256  | -1.826997 | -2.795479 |
| C | -2.668930 | -2.862827 | -3.191628 | H  | 3.691478  | -1.230137 | -3.173743 |
| H | -3.667944 | -2.670849 | -2.784251 | H  | 2.785515  | -2.747337 | -3.385344 |
| H | -2.159437 | -1.895688 | -3.266563 | H  | 1.932482  | -1.259913 | -2.941081 |
| H | -2.786531 | -3.257934 | -4.205647 | C  | 1.855510  | -2.982081 | -0.813889 |
| C | -1.037718 | -4.588953 | 1.343481  | H  | 1.919118  | -3.991040 | -1.235755 |
| H | -0.938293 | -3.562509 | 1.703050  | H  | 1.842706  | -3.071640 | 0.276040  |
| H | -1.928577 | -5.009033 | 1.828242  | H  | 0.899657  | -2.562085 | -1.135531 |
| H | -0.176373 | -5.159573 | 1.704755  | C  | 4.455759  | -3.477301 | 0.403574  |
| C | 0.187074  | -6.997649 | -2.905409 | H  | 5.500191  | -3.668760 | 0.672588  |
| H | 1.175899  | -6.685284 | -3.267837 | H  | 4.006948  | -2.885279 | 1.204445  |
| H | 0.341246  | -7.845566 | -2.229630 | H  | 3.936660  | -4.440903 | 0.344067  |
| H | -0.375573 | -7.355224 | -3.775154 | C  | 5.020758  | -3.636465 | -2.026338 |
| C | -5.599913 | -2.581651 | 2.154891  | H  | 4.378537  | -4.506890 | -2.207317 |
| C | -6.667327 | -1.542513 | 2.513128  | H  | 5.158663  | -3.099052 | -2.967521 |
| C | -5.999384 | -0.198543 | 2.814057  | H  | 6.001491  | -4.001320 | -1.702626 |
| C | -5.290171 | 0.333785  | 1.561733  | C  | 4.951300  | 0.936998  | -1.115322 |
| H | -6.735238 | 0.538805  | 3.156928  | C  | 5.666614  | 0.894405  | -2.325964 |
| H | -7.367000 | -1.418809 | 1.674061  | C  | 4.663804  | 2.213433  | -0.597703 |
| H | -7.257633 | -1.892014 | 3.368654  | C  | 6.056603  | 2.055729  | -2.997094 |
| H | -5.092362 | -2.900749 | 3.078369  | H  | 5.934069  | -0.076496 | -2.734790 |
| H | -6.064818 | -3.487464 | 1.744404  | C  | 5.045074  | 3.384286  | -1.259782 |
| H | -6.059187 | 0.676476  | 0.855534  | H  | 4.141269  | 2.300948  | 0.352331  |
| H | -4.701599 | 1.224733  | 1.808301  | C  | 5.741527  | 3.309346  | -2.467637 |
| H | -5.274758 | -0.325553 | 3.631178  | H  | 6.612188  | 1.983802  | -3.929979 |
| H | -3.376848 | 4.925567  | -1.159381 | H  | 4.804101  | 4.354127  | -0.828862 |
| C | -5.563869 | 3.756598  | -2.166020 | H  | 6.044452  | 4.216919  | -2.985007 |
| H | -6.200714 | 4.232629  | -1.404320 | O  | 4.526223  | -0.294301 | 1.144566  |
| H | -5.180682 | 4.575709  | -2.787437 | H  | 3.382580  | 0.036448  | 1.614560  |
| C | -5.482841 | 0.796542  | -1.822042 | C  | 5.751202  | 0.089331  | 1.789447  |
| C | -6.427428 | 2.808021  | -3.004741 | H  | 6.560793  | -0.088867 | 1.075305  |
| H | -5.885420 | 2.517088  | -3.915824 | H  | 5.722200  | 1.161603  | 2.010853  |
| H | -7.339423 | 3.323267  | -3.329465 | C  | 5.979250  | -0.728182 | 3.053751  |
| C | -6.763445 | 1.552980  | -2.195259 | H  | 6.028384  | -1.796289 | 2.819332  |
| H | -5.065073 | 0.346614  | -2.736876 | H  | 6.924544  | -0.432834 | 3.524813  |

|   |           |           |          |   |           |           |           |
|---|-----------|-----------|----------|---|-----------|-----------|-----------|
| H | 5.178115  | -0.572573 | 3.785294 | C | -2.513116 | 1.286068  | -0.381800 |
| C | -0.816891 | -3.026647 | 4.649022 | C | -4.566463 | 0.478204  | -1.413794 |
| C | -1.598878 | -1.954480 | 4.211197 | H | -2.836699 | -4.802236 | 1.049432  |
| C | -1.027966 | -0.926900 | 3.462944 | C | -2.826055 | 2.625871  | -0.690192 |
| C | 0.342281  | -0.934090 | 3.134300 | C | -4.878493 | 1.800524  | -1.772956 |
| C | 1.109125  | -2.037483 | 3.561933 | C | -4.035916 | 2.836863  | -1.360404 |
| C | 0.538352  | -3.064682 | 4.312640 | C | -1.992370 | 3.806642  | -0.298836 |
| H | -1.257900 | -3.823078 | 5.242376 | C | -1.520004 | 4.721320  | -1.269309 |
| H | -2.656083 | -1.912842 | 4.461685 | C | -1.771585 | 4.080435  | 1.073219  |
| H | -1.642597 | -0.092594 | 3.135495 | C | -0.795533 | 5.846495  | -0.855523 |
| H | 2.167229  | -2.085429 | 3.319845 | C | -1.053198 | 5.222855  | 1.436771  |
| H | 1.157237  | -3.896195 | 4.640647 | C | -0.544030 | 6.116088  | 0.489663  |
| C | 0.928940  | 0.222585  | 2.412562 | H | -0.426194 | 6.535352  | -1.613069 |
| H | 0.265811  | 1.085173  | 2.389679 | H | -0.901829 | 5.427520  | 2.494909  |
| C | 2.368408  | 0.527934  | 2.537212 | C | -1.790381 | 4.573916  | -2.753964 |
| H | 2.866428  | -0.049034 | 3.324593 | H | -2.712149 | 5.095061  | -3.045788 |
| C | 2.698550  | 1.980591  | 2.619395 | H | -0.976000 | 5.015862  | -3.337845 |
| H | 2.129913  | 2.631920  | 1.954622 | H | -1.903373 | 3.532895  | -3.061849 |
| C | 3.600434  | 2.528899  | 3.442910 | C | 0.251972  | 7.330142  | 0.909228  |
| H | 4.184411  | 1.929979  | 4.138953 | H | -0.096501 | 7.725204  | 1.869997  |
| H | 3.779572  | 3.600565  | 3.455761 | H | 1.317202  | 7.089081  | 1.025943  |

### TS3f

SCF energy in Ethanol: -3455.872357 a.u.

Free energy in Ethanol: -3454.691413 a.u.

|   |           |           |           |   |           |           |           |
|---|-----------|-----------|-----------|---|-----------|-----------|-----------|
| P | -0.151043 | 0.078431  | -0.655598 | H | 0.181185  | 8.132100  | 0.166549  |
| N | 0.042124  | 0.763644  | -2.175061 | C | -2.341028 | 3.199852  | 2.159974  |
| C | 0.904158  | 1.952522  | -2.252227 | H | -3.401889 | 2.984055  | 1.984808  |
| H | 1.350752  | 2.003305  | -3.250722 | H | -1.817652 | 2.241549  | 2.221794  |
| H | 0.343099  | 2.875222  | -2.065863 | H | -2.251945 | 3.685977  | 3.135328  |
| H | 1.717304  | 1.883373  | -1.528962 | C | -0.777263 | -4.103427 | -0.490814 |
| C | -0.894160 | 0.623031  | -3.291536 | C | 0.026841  | -4.801191 | 0.444328  |
| H | -1.445758 | -0.311572 | -3.205404 | C | -0.584593 | -4.338715 | -1.874184 |
| H | -1.612378 | 1.451257  | -3.338709 | C | 1.037665  | -5.650962 | -0.021885 |
| H | -0.320595 | 0.608817  | -4.226857 | C | 0.428009  | -5.209491 | -2.288871 |
| O | -1.037712 | -1.252784 | -1.151585 | C | 1.265674  | -5.863354 | -1.382595 |
| O | -1.290160 | 0.963690  | 0.206574  | H | 1.656303  | -6.171939 | 0.706851  |
| C | -2.020802 | -1.855658 | -0.373070 | H | 0.557208  | -5.388681 | -3.354763 |
| C | -3.159148 | -1.112241 | -0.027704 | C | -1.468045 | -3.714177 | -2.931577 |
| C | -1.886931 | -3.215404 | -0.022004 | H | -2.509961 | -3.644030 | -2.602783 |
| C | -4.088700 | -1.651746 | 0.898019  | H | -1.137964 | -2.699154 | -3.178636 |
| C | -3.410192 | 0.236613  | -0.631086 | H | -1.441081 | -4.306801 | -3.851743 |
| C | -2.895161 | -3.749279 | 0.786773  | C | -0.174550 | -4.716581 | 1.944959  |
| C | -3.951840 | -2.990815 | 1.299282  | H | -0.587011 | -3.757944 | 2.265630  |
|   |           |           |           | H | -0.866027 | -5.494812 | 2.294925  |
|   |           |           |           | H | 0.772391  | -4.868722 | 2.471456  |
|   |           |           |           | C | 2.382075  | -6.763956 | -1.856999 |
|   |           |           |           | H | 2.582295  | -7.567371 | -1.139802 |

|    |           |           |           |   |          |           |           |
|----|-----------|-----------|-----------|---|----------|-----------|-----------|
| H  | 2.144850  | -7.222306 | -2.823239 | H | 2.298842 | -3.183947 | 1.457733  |
| H  | 3.317449  | -6.202421 | -1.984359 | C | 3.750429 | -3.112621 | 2.965499  |
| C  | -4.903400 | -3.646527 | 2.289016  | H | 4.267590 | -2.543969 | 3.735994  |
| C  | -6.179608 | -2.837889 | 2.542951  | H | 4.056734 | -4.147214 | 2.837595  |
| C  | -5.823278 | -1.363445 | 2.747090  | B | 4.391735 | 0.620488  | -0.280551 |
| C  | -5.203738 | -0.783639 | 1.468969  | O | 3.185360 | -0.140031 | -0.802642 |
| H  | -6.709497 | -0.778130 | 3.020171  | O | 5.510028 | 0.076068  | -0.995336 |
| H  | -6.860713 | -2.930613 | 1.684840  | C | 3.626716 | -1.026689 | -1.879287 |
| H  | -6.710173 | -3.242090 | 3.413240  | C | 5.171296 | -1.176568 | -1.585679 |
| H  | -4.374635 | -3.782733 | 3.244717  | C | 3.349624 | -0.314145 | -3.210462 |
| H  | -5.149939 | -4.657680 | 1.939703  | H | 3.871374 | 0.645763  | -3.258143 |
| H  | -6.003272 | -0.655456 | 0.726361  | H | 3.664540 | -0.927456 | -4.061613 |
| H  | -4.815426 | 0.223142  | 1.659252  | H | 2.275537 | -0.135271 | -3.301106 |
| H  | -5.114030 | -1.271964 | 3.582216  | C | 2.844603 | -2.337141 | -1.831401 |
| H  | -4.320702 | 3.860832  | -1.589559 | H | 3.220025 | -3.029573 | -2.594779 |
| C  | -6.139891 | 2.151964  | -2.548398 | H | 2.925635 | -2.829085 | -0.860288 |
| H  | -6.893450 | 2.528888  | -1.839549 | H | 1.784445 | -2.164088 | -2.039928 |
| H  | -5.929976 | 2.985538  | -3.230196 | C | 5.498254 | -2.320500 | -0.606779 |
| C  | -5.399906 | -0.676362 | -1.957800 | H | 6.552770 | -2.238159 | -0.322558 |
| C  | -6.736153 | 0.968764  | -3.318387 | H | 4.902936 | -2.267815 | 0.306467  |
| H  | -6.111715 | 0.740641  | -4.193956 | H | 5.347474 | -3.304168 | -1.067450 |
| H  | -7.730009 | 1.233852  | -3.698733 | C | 6.033458 | -1.350368 | -2.842670 |
| C  | -6.805022 | -0.264179 | -2.413683 | H | 5.761621 | -2.256926 | -3.397171 |
| H  | -4.860478 | -1.092678 | -2.823511 | H | 5.948299 | -0.490375 | -3.511008 |
| H  | -5.459327 | -1.495811 | -1.238416 | H | 7.084002 | -1.439588 | -2.546052 |
| H  | -7.430559 | -0.038516 | -1.537594 | C | 4.290891 | 2.229469  | -0.403060 |
| H  | -7.281726 | -1.104308 | -2.933153 | C | 5.103720 | 2.936009  | -1.306500 |
| Ni | 1.638904  | -0.347680 | 0.513928  | C | 3.374683 | 2.986622  | 0.350777  |
| C  | -1.006786 | 1.604869  | 5.149701  | C | 5.003369 | 4.321274  | -1.460250 |
| C  | -1.663673 | 0.483339  | 4.639817  | H | 5.831078 | 2.379541  | -1.891904 |
| C  | -1.065931 | -0.289922 | 3.644437  | C | 3.257294 | 4.370707  | 0.202188  |
| C  | 0.206829  | 0.028521  | 3.136854  | H | 2.730666 | 2.483621  | 1.072246  |
| C  | 0.841422  | 1.179543  | 3.642738  | C | 4.075200 | 5.044393  | -0.707833 |
| C  | 0.245706  | 1.953509  | 4.637030  | H | 5.650370 | 4.837777  | -2.166423 |
| H  | -1.465945 | 2.202861  | 5.932412  | H | 2.526959 | 4.918517  | 0.793137  |
| H  | -2.641229 | 0.202497  | 5.024631  | H | 3.991992 | 6.122360  | -0.826930 |
| H  | -1.582026 | -1.168518 | 3.264382  | O | 4.355750 | 0.193356  | 1.207182  |
| H  | 1.817419  | 1.466524  | 3.259711  | H | 3.269913 | -0.396147 | 1.534756  |
| H  | 0.763652  | 2.831561  | 5.014974  | C | 5.197547 | 0.762004  | 2.213544  |
| C  | 0.866271  | -0.892150 | 2.173028  | H | 5.327775 | 1.828144  | 1.998191  |
| H  | 0.256290  | -1.776013 | 1.976006  | H | 4.660668 | 0.678704  | 3.167635  |
| C  | 2.320258  | -1.157394 | 2.305025  | C | 6.544170 | 0.052557  | 2.291707  |
| H  | 2.748139  | -0.651235 | 3.178742  | H | 7.072977 | 0.137148  | 1.338461  |
| C  | 2.786618  | -2.567770 | 2.212559  | H | 7.160817 | 0.501660  | 3.080236  |

|                                           |           |           |           |   |           |           |           |
|-------------------------------------------|-----------|-----------|-----------|---|-----------|-----------|-----------|
| H                                         | 6.409039  | -1.010530 | 2.517811  | H | 2.647549  | 7.414650  | -0.677021 |
|                                           |           |           |           | H | 2.601694  | 7.057287  | 1.058240  |
| <b>TS3g</b>                               |           |           |           | C | -1.214639 | 3.927883  | 1.983130  |
| SCF energy in Ethanol: -3455.870354 a.u.  |           |           |           | H | -2.286662 | 4.143160  | 1.900072  |
| Free energy in Ethanol: -3454.690318 a.u. |           |           |           | H | -1.112302 | 2.847595  | 2.129792  |
| P                                         | -0.349567 | -0.024660 | -0.522319 | H | -0.839452 | 4.424882  | 2.882982  |
| N                                         | -0.088942 | 0.348231  | -2.132848 | C | -2.399511 | -3.777858 | 0.029774  |
| C                                         | 1.180822  | 0.970163  | -2.517407 | C | -1.724197 | -4.646049 | 0.915913  |
| H                                         | 1.569624  | 0.488238  | -3.421736 | C | -2.593570 | -4.175042 | -1.315346 |
| H                                         | 1.053780  | 2.042541  | -2.710362 | C | -1.245321 | -5.873565 | 0.441879  |
| H                                         | 1.926979  | 0.842103  | -1.734427 | C | -2.098264 | -5.410066 | -1.743048 |
| C                                         | -1.089361 | 0.333402  | -3.199069 | C | -1.416999 | -6.276505 | -0.883121 |
| H                                         | -2.014733 | -0.120025 | -2.850563 | H | -0.722313 | -6.531745 | 1.133523  |
| H                                         | -1.305001 | 1.348625  | -3.555002 | H | -2.262687 | -5.709194 | -2.776703 |
| H                                         | -0.705425 | -0.251322 | -4.045879 | C | -3.354647 | -3.315623 | -2.300086 |
| O                                         | -1.646619 | -1.058507 | -0.794672 | H | -4.287260 | -2.934143 | -1.869686 |
| O                                         | -1.104100 | 1.258463  | 0.258822  | H | -2.763228 | -2.447022 | -2.610828 |
| C                                         | -2.726317 | -1.222852 | 0.067490  | H | -3.605035 | -3.887858 | -3.198943 |
| C                                         | -3.538773 | -0.121260 | 0.377302  | C | -1.504171 | -4.301220 | 2.373698  |
| C                                         | -3.035405 | -2.517427 | 0.530922  | H | -1.354859 | -3.229157 | 2.520509  |
| C                                         | -4.508776 | -0.243013 | 1.406271  | H | -2.360460 | -4.594972 | 2.995350  |
| C                                         | -3.408922 | 1.173324  | -0.367936 | H | -0.628506 | -4.830588 | 2.764721  |
| C                                         | -4.076872 | -2.617734 | 1.456735  | C | -0.869619 | -7.595169 | -1.378924 |
| C                                         | -4.769475 | -1.509389 | 1.953815  | H | 0.117637  | -7.468470 | -1.843708 |
| C                                         | -2.207953 | 1.891143  | -0.300905 | H | -0.753646 | -8.314241 | -0.561041 |
| C                                         | -4.495059 | 1.710533  | -1.103996 | H | -1.525263 | -8.043163 | -2.133949 |
| H                                         | -4.346000 | -3.607433 | 1.818183  | C | -5.775273 | -1.723161 | 3.074290  |
| C                                         | -2.099418 | 3.221758  | -0.747362 | C | -6.702735 | -0.525496 | 3.304573  |
| C                                         | -4.399326 | 3.024764  | -1.595487 | C | -5.882657 | 0.767023  | 3.305930  |
| C                                         | -3.232472 | 3.760544  | -1.364652 | C | -5.238086 | 0.988779  | 1.931113  |
| C                                         | -0.878980 | 4.065995  | -0.549674 | H | -6.509555 | 1.630995  | 3.557452  |
| C                                         | -0.186824 | 4.610968  | -1.656108 | H | -7.457427 | -0.475294 | 2.506585  |
| C                                         | -0.459147 | 4.399271  | 0.760352  | H | -7.247168 | -0.650479 | 4.248171  |
| C                                         | 0.930159  | 5.424753  | -1.433194 | H | -5.223476 | -1.926032 | 4.004996  |
| C                                         | 0.656010  | 5.225581  | 0.933563  | H | -6.358767 | -2.630632 | 2.871211  |
| C                                         | 1.374849  | 5.740911  | -0.148633 | H | -6.026493 | 1.292170  | 1.228526  |
| H                                         | 1.461206  | 5.828245  | -2.293624 | H | -4.541186 | 1.833697  | 1.971403  |
| H                                         | 0.963660  | 5.480493  | 1.945569  | H | -5.104546 | 0.704051  | 4.079831  |
| C                                         | -0.622642 | 4.386983  | -3.089821 | H | -3.192011 | 4.794007  | -1.700928 |
| H                                         | -1.338810 | 5.154117  | -3.413790 | C | -5.552639 | 3.700079  | -2.323580 |
| H                                         | 0.235327  | 4.444555  | -3.767951 | H | -6.073454 | 4.362919  | -1.615260 |
| H                                         | -1.109201 | 3.420248  | -3.232881 | H | -5.156247 | 4.356092  | -3.108651 |
| C                                         | 2.596532  | 6.605642  | 0.060531  | C | -5.701537 | 0.849862  | -1.459846 |
| H                                         | 3.521373  | 6.021420  | -0.040504 | C | -6.568304 | 2.715542  | -2.912732 |

|    |           |           |           |                                           |           |           |           |
|----|-----------|-----------|-----------|-------------------------------------------|-----------|-----------|-----------|
| H  | -6.139708 | 2.219732  | -3.795277 | H                                         | 5.601007  | 0.556557  | 1.747856  |
| H  | -7.457505 | 3.258253  | -3.255537 | C                                         | 6.196642  | -1.457009 | 2.297800  |
| C  | -6.938749 | 1.657938  | -1.869332 | H                                         | 6.273981  | -2.443999 | 1.832839  |
| H  | -5.408985 | 0.206456  | -2.304960 | H                                         | 7.191603  | -1.155651 | 2.647908  |
| H  | -5.947799 | 0.161065  | -0.649321 | H                                         | 5.539788  | -1.532973 | 3.171592  |
| H  | -7.369207 | 2.153166  | -0.986645 | C                                         | 4.607156  | 3.412898  | 3.774016  |
| H  | -7.707960 | 0.978670  | -2.256382 | C                                         | 4.690330  | 2.211550  | 4.479145  |
| Ni | 1.451874  | -0.516264 | 0.638812  | C                                         | 3.970270  | 1.094466  | 4.050796  |
| B  | 4.159318  | -1.187535 | -0.662649 | C                                         | 3.154062  | 1.149459  | 2.909885  |
| O  | 2.663394  | -1.461830 | -0.679098 | C                                         | 3.075434  | 2.366799  | 2.213058  |
| O  | 4.765678  | -2.446135 | -1.002750 | C                                         | 3.791838  | 3.484589  | 2.641686  |
| C  | 2.455379  | -2.807820 | -1.208986 | H                                         | 5.168307  | 4.283376  | 4.103061  |
| C  | 3.824826  | -3.507305 | -0.875213 | H                                         | 5.314491  | 2.140612  | 5.366497  |
| C  | 2.199284  | -2.672544 | -2.717400 | H                                         | 4.037452  | 0.164923  | 4.611583  |
| H  | 3.056556  | -2.228113 | -3.229412 | H                                         | 2.445729  | 2.441122  | 1.329901  |
| H  | 1.980470  | -3.644258 | -3.173673 | H                                         | 3.714685  | 4.413931  | 2.083649  |
| H  | 1.332185  | -2.022639 | -2.870251 | C                                         | 2.375627  | -0.069087 | 2.481806  |
| C  | 1.249045  | -3.458459 | -0.541941 | H                                         | 2.614309  | -0.927877 | 3.120271  |
| H  | 1.180211  | -4.514086 | -0.826364 | C                                         | 0.912345  | 0.126010  | 2.336158  |
| H  | 1.311330  | -3.408031 | 0.548619  | H                                         | 0.570712  | 1.161375  | 2.321600  |
| H  | 0.317475  | -2.981015 | -0.854521 | C                                         | 0.006260  | -0.785023 | 3.053412  |
| C  | 3.873591  | -4.074868 | 0.557524  | H                                         | 0.386739  | -1.790790 | 3.240637  |
| H  | 4.905002  | -4.370903 | 0.776493  | C                                         | -1.218071 | -0.466558 | 3.503261  |
| H  | 3.576394  | -3.326645 | 1.296561  | H                                         | -1.641352 | 0.522285  | 3.346417  |
| H  | 3.234669  | -4.958061 | 0.671975  | H                                         | -1.836471 | -1.185234 | 4.032831  |
| C  | 4.217193  | -4.614530 | -1.860237 |                                           |           |           |           |
| H  | 3.477741  | -5.424556 | -1.871020 | <b>TS3h</b>                               |           |           |           |
| H  | 4.326408  | -4.224720 | -2.875099 | SCF energy in Ethanol: -3455.869624 a.u.  |           |           |           |
| H  | 5.180705  | -5.040391 | -1.560329 | Free energy in Ethanol: -3454.686867 a.u. |           |           |           |
| C  | 4.667146  | 0.010562  | -1.629443 | P                                         | 0.444715  | -0.237455 | -0.538790 |
| C  | 5.245200  | -0.280955 | -2.878214 | N                                         | 0.525773  | -1.115965 | -1.967516 |
| C  | 4.546146  | 1.371910  | -1.293715 | C                                         | -0.144679 | -2.423311 | -1.977654 |
| C  | 5.657291  | 0.724139  | -3.756587 | H                                         | -0.452066 | -2.657560 | -3.002290 |
| H  | 5.386933  | -1.323290 | -3.151662 | H                                         | 0.510834  | -3.221832 | -1.612059 |
| C  | 4.951288  | 2.388546  | -2.163225 | H                                         | -1.042698 | -2.395772 | -1.361985 |
| H  | 4.139145  | 1.649022  | -0.323260 | C                                         | 1.564358  | -0.969374 | -2.989327 |
| C  | 5.505867  | 2.067038  | -3.403898 | H                                         | 1.981742  | 0.035831  | -2.964283 |
| H  | 6.103215  | 0.460602  | -4.713565 | H                                         | 2.380276  | -1.691620 | -2.856886 |
| H  | 4.841562  | 3.430477  | -1.868970 | H                                         | 1.109503  | -1.138203 | -3.973619 |
| H  | 5.826714  | 2.853651  | -4.083151 | O                                         | 1.162789  | 1.153352  | -1.127989 |
| O  | 4.362391  | -0.807207 | 0.817686  | O                                         | 1.608914  | -0.821620 | 0.521816  |
| H  | 3.291843  | -0.475517 | 1.414989  | C                                         | 1.992510  | 1.980405  | -0.376968 |
| C  | 5.666860  | -0.438378 | 1.298539  | C                                         | 3.195353  | 1.464456  | 0.127267  |
| H  | 6.328622  | -0.370815 | 0.430283  | C                                         | 1.639575  | 3.334955  | -0.215018 |

|   |           |           |           |    |           |           |           |
|---|-----------|-----------|-----------|----|-----------|-----------|-----------|
| C | 3.966677  | 2.250469  | 1.022308  | H  | 0.083654  | 5.556038  | 1.797762  |
| C | 3.677022  | 0.098344  | -0.258572 | H  | -1.456013 | 4.702053  | 1.900521  |
| C | 2.495216  | 4.112460  | 0.570440  | C  | -2.941134 | 5.974242  | -2.704288 |
| C | 3.610070  | 3.592353  | 1.234214  | H  | -3.321446 | 6.795927  | -2.087596 |
| C | 2.916228  | -1.027867 | 0.088126  | H  | -2.690082 | 6.378603  | -3.690912 |
| C | 4.920198  | -0.078946 | -0.915937 | H  | -3.767855 | 5.264709  | -2.844861 |
| H | 2.262040  | 5.167317  | 0.691820  | C  | 4.378827  | 4.501117  | 2.181883  |
| C | 3.445526  | -2.333142 | 0.032752  | C  | 5.735371  | 3.934192  | 2.611913  |
| C | 5.444581  | -1.377041 | -1.039376 | C  | 5.577577  | 2.459830  | 2.991048  |
| C | 4.727047  | -2.456653 | -0.514162 | C  | 5.148445  | 1.640139  | 1.767250  |
| C | 2.753936  | -3.546470 | 0.574006  | H  | 6.514066  | 2.053139  | 3.391405  |
| C | 2.476490  | -4.659967 | -0.250534 | H  | 6.458094  | 4.021644  | 1.787967  |
| C | 2.475102  | -3.628744 | 1.961919  | H  | 6.136034  | 4.518862  | 3.448543  |
| C | 1.877590  | -5.796916 | 0.310096  | H  | 3.765303  | 4.667595  | 3.080420  |
| C | 1.889624  | -4.787466 | 2.475975  | H  | 4.501476  | 5.488753  | 1.718443  |
| C | 1.570021  | -5.883141 | 1.666797  | H  | 6.013460  | 1.546979  | 1.096315  |
| H | 1.656261  | -6.642023 | -0.339082 | H  | 4.896650  | 0.616543  | 2.066293  |
| H | 1.692790  | -4.842271 | 3.545146  | H  | 4.825329  | 2.366603  | 3.787064  |
| C | 2.835436  | -4.714138 | -1.722429 | H  | 5.173440  | -3.447452 | -0.552971 |
| H | 3.827882  | -5.160490 | -1.872447 | C  | 6.803025  | -1.642297 | -1.672498 |
| H | 2.119715  | -5.336482 | -2.270098 | H  | 7.542859  | -1.787075 | -0.869969 |
| H | 2.856664  | -3.727897 | -2.189627 | H  | 6.771348  | -2.591036 | -2.222747 |
| C | 0.918626  | -7.115965 | 2.249830  | C  | 5.626818  | 1.097596  | -1.578922 |
| H | -0.154965 | -6.959988 | 2.420851  | C  | 7.283738  | -0.509823 | -2.586135 |
| H | 1.021006  | -7.977096 | 1.581352  | H  | 6.702534  | -0.511210 | -3.519213 |
| H | 1.361264  | -7.382887 | 3.216483  | H  | 8.331504  | -0.674536 | -2.864871 |
| C | 2.853490  | -2.517568 | 2.914418  | C  | 7.107290  | 0.838852  | -1.883578 |
| H | 3.902260  | -2.222868 | 2.786689  | H  | 5.104646  | 1.303396  | -2.526877 |
| H | 2.243767  | -1.622650 | 2.759004  | H  | 5.514063  | 2.009020  | -0.988032 |
| H | 2.720851  | -2.841189 | 3.952040  | H  | 7.686108  | 0.839673  | -0.948336 |
| C | 0.447889  | 3.977041  | -0.852699 | H  | 7.502212  | 1.655973  | -2.499355 |
| C | -0.535141 | 4.606208  | -0.052174 | Ni | -1.505566 | -0.074570 | 0.448433  |
| C | 0.345408  | 4.055287  | -2.262512 | C  | -5.296908 | 3.536089  | 3.052609  |
| C | -1.616381 | 5.244450  | -0.672775 | C  | -5.251341 | 2.402834  | 3.865486  |
| C | -0.746653 | 4.714528  | -2.835058 | C  | -4.334074 | 1.383801  | 3.600316  |
| C | -1.749446 | 5.304119  | -2.061070 | C  | -3.440274 | 1.469089  | 2.520800  |
| H | -2.368627 | 5.721153  | -0.046444 | C  | -3.500210 | 2.615021  | 1.711466  |
| H | -0.808190 | 4.777166  | -3.920028 | C  | -4.414093 | 3.635886  | 1.974664  |
| C | 1.405025  | 3.482607  | -3.177600 | H  | -6.011280 | 4.329701  | 3.254001  |
| H | 2.415359  | 3.689666  | -2.808419 | H  | -5.928262 | 2.309281  | 4.711052  |
| H | 1.310062  | 2.394737  | -3.265866 | H  | -4.304651 | 0.509400  | 4.246991  |
| H | 1.317008  | 3.908967  | -4.181987 | H  | -2.824685 | 2.710545  | 0.865925  |
| C | -0.455427 | 4.660617  | 1.460367  | H  | -4.442239 | 4.508062  | 1.325973  |
| H | 0.065896  | 3.799274  | 1.883708  | C  | -2.465050 | 0.350617  | 2.265305  |

|   |           |           |           |
|---|-----------|-----------|-----------|
| H | -2.592345 | -0.442772 | 3.012712  |
| C | -1.022573 | 0.685204  | 2.124502  |
| H | -0.811119 | 1.743468  | 1.946927  |
| C | -0.072811 | 0.071083  | 3.067025  |
| H | -0.258058 | -0.972359 | 3.327347  |
| C | 0.954530  | 0.710978  | 3.644222  |
| H | 1.179428  | 1.751140  | 3.418200  |
| H | 1.608922  | 0.214584  | 4.355094  |
| B | -3.952655 | -1.588944 | -0.579008 |
| O | -2.842712 | -0.634223 | -0.989909 |
| O | -5.045337 | -1.283848 | -1.457616 |
| C | -3.285016 | 0.097132  | -2.178868 |
| C | -4.855003 | -0.012201 | -2.073498 |
| C | -2.727198 | -0.629529 | -3.411066 |
| H | -3.075847 | -1.665160 | -3.450856 |
| H | -3.025557 | -0.123870 | -4.335816 |
| H | -1.635521 | -0.627869 | -3.360786 |
| C | -2.749454 | 1.526629  | -2.150491 |
| H | -3.141704 | 2.091066  | -3.005089 |
| H | -3.035754 | 2.055442  | -1.239818 |
| H | -1.657905 | 1.537212  | -2.226171 |
| C | -5.481859 | 1.088865  | -1.197939 |
| H | -6.530889 | 0.831189  | -1.018462 |
| H | -4.988760 | 1.170560  | -0.227857 |
| H | -5.452221 | 2.067899  | -1.690727 |
| C | -5.574063 | -0.031887 | -3.428082 |
| H | -5.389825 | 0.888427  | -3.995890 |
| H | -5.266179 | -0.887217 | -4.034041 |
| H | -6.653328 | -0.112986 | -3.259928 |
| C | -3.553007 | -3.156303 | -0.599900 |
| C | -4.076662 | -4.018443 | -1.578971 |
| C | -2.651132 | -3.718212 | 0.322947  |
| C | -3.712197 | -5.365728 | -1.646138 |
| H | -4.789565 | -3.615419 | -2.293592 |
| C | -2.271443 | -5.061297 | 0.263764  |
| H | -2.230258 | -3.090312 | 1.108848  |
| C | -2.802837 | -5.891712 | -0.725897 |
| H | -4.139005 | -6.006574 | -2.415051 |
| H | -1.559110 | -5.455806 | 0.984289  |
| H | -2.514303 | -6.939235 | -0.775879 |
| O | -4.193148 | -1.117034 | 0.872776  |
| H | -3.228400 | -0.429693 | 1.329381  |
| C | -5.053005 | -1.816629 | 1.780524  |
| H | -4.986879 | -2.888964 | 1.568317  |

|   |           |           |          |
|---|-----------|-----------|----------|
| H | -4.658344 | -1.652401 | 2.790558 |
| C | -6.491974 | -1.326785 | 1.677933 |
| H | -6.870024 | -1.477655 | 0.663135 |
| H | -7.127974 | -1.882541 | 2.378419 |
| H | -6.555860 | -0.260989 | 1.920335 |

### IM1-Z

SCF energy in Ethanol: -3044.786104 a.u.

Free energy in Ethanol: -3043.783717 a.u.

|   |           |           |           |
|---|-----------|-----------|-----------|
| P | 0.067058  | 0.324484  | 0.515090  |
| N | 0.424566  | 0.580170  | 2.133199  |
| C | -0.245571 | 1.688852  | 2.811039  |
| H | -0.579845 | 1.363952  | 3.802541  |
| H | 0.419450  | 2.555915  | 2.919616  |
| H | -1.128080 | 1.997452  | 2.244080  |
| C | 1.500209  | -0.041637 | 2.903420  |
| H | 1.913978  | -0.885777 | 2.354731  |
| H | 2.307837  | 0.670555  | 3.118986  |
| H | 1.092915  | -0.406959 | 3.854640  |
| O | 0.783462  | -1.194647 | 0.399337  |
| O | 1.147394  | 1.219795  | -0.441108 |
| C | 1.317205  | -1.655441 | -0.798185 |
| C | 2.492470  | -1.068760 | -1.292621 |
| C | 0.702343  | -2.741231 | -1.446528 |
| C | 2.974322  | -1.448931 | -2.572797 |
| C | 3.200294  | -0.008007 | -0.506640 |
| C | 1.270904  | -3.163260 | -2.650247 |
| C | 2.359704  | -2.518979 | -3.245182 |
| C | 2.512870  | 1.179972  | -0.214561 |
| C | 4.552003  | -0.141548 | -0.106983 |
| H | 0.825512  | -4.016609 | -3.157443 |
| C | 3.174622  | 2.330307  | 0.258212  |
| C | 5.224960  | 0.981623  | 0.406271  |
| C | 4.539883  | 2.195478  | 0.529006  |
| C | 2.486899  | 3.648834  | 0.428596  |
| C | 2.441304  | 4.290060  | 1.686823  |
| C | 1.923078  | 4.299228  | -0.698146 |
| C | 1.786050  | 5.523619  | 1.806071  |
| C | 1.288322  | 5.532326  | -0.531351 |
| C | 1.192219  | 6.158250  | 0.715909  |
| H | 1.746297  | 6.000401  | 2.783982  |
| H | 0.864935  | 6.023597  | -1.405603 |
| C | 3.101288  | 3.719616  | 2.925826  |
| H | 4.141171  | 4.061265  | 3.017155  |

|   |           |           |           |    |           |           |           |
|---|-----------|-----------|-----------|----|-----------|-----------|-----------|
| H | 2.577546  | 4.049593  | 3.829449  | H  | 7.282710  | 1.384958  | -0.042136 |
| H | 3.125689  | 2.628107  | 2.921871  | H  | 6.879183  | 1.572828  | 1.652810  |
| C | 0.465994  | 7.474268  | 0.871392  | C  | 5.236738  | -1.502421 | -0.119820 |
| H | 0.690410  | 8.156502  | 0.043257  | C  | 7.226351  | -0.481361 | 1.033498  |
| H | -0.622756 | 7.330345  | 0.882623  | H  | 6.846845  | -0.851634 | 1.996511  |
| H | 0.739674  | 7.975274  | 1.805831  | H  | 8.320366  | -0.464715 | 1.109613  |
| C | 2.027322  | 3.715981  | -2.089897 | C  | 6.767531  | -1.423065 | -0.083363 |
| H | 3.050549  | 3.392499  | -2.313598 | H  | 4.894983  | -2.050386 | 0.772643  |
| H | 1.377902  | 2.842614  | -2.207813 | H  | 4.903140  | -2.104375 | -0.968018 |
| H | 1.735910  | 4.457836  | -2.840140 | H  | 7.146142  | -1.055341 | -1.048339 |
| C | -0.486088 | -3.473361 | -0.906679 | H  | 7.184160  | -2.427934 | 0.057160  |
| C | -1.725388 | -3.400484 | -1.580811 | Ni | -1.982149 | 0.587780  | -0.150266 |
| C | -0.350308 | -4.318678 | 0.215510  | C  | -8.425134 | 2.906763  | -1.201282 |
| C | -2.805423 | -4.154838 | -1.109266 | C  | -8.474379 | 1.627487  | -1.760747 |
| C | -1.454808 | -5.063282 | 0.645865  | C  | -7.329050 | 1.061783  | -2.316771 |
| C | -2.694797 | -4.991354 | 0.004789  | C  | -6.097583 | 1.746718  | -2.317854 |
| H | -3.758535 | -4.088261 | -1.630648 | C  | -6.074385 | 3.045836  | -1.773074 |
| H | -1.337213 | -5.729266 | 1.498947  | C  | -7.220888 | 3.613844  | -1.218272 |
| C | 0.965105  | -4.447649 | 0.949483  | H  | -9.317510 | 3.352167  | -0.769752 |
| H | 1.803545  | -4.582216 | 0.257322  | H  | -9.407871 | 1.070261  | -1.766293 |
| H | 1.173622  | -3.549679 | 1.542750  | H  | -7.376554 | 0.065623  | -2.751176 |
| H | 0.947818  | -5.303128 | 1.632433  | H  | -5.159810 | 3.628011  | -1.819214 |
| C | -1.912131 | -2.527603 | -2.803884 | H  | -7.175511 | 4.620338  | -0.809501 |
| H | -1.507080 | -1.522185 | -2.646232 | C  | -4.924453 | 1.099040  | -2.930652 |
| H | -1.404037 | -2.940839 | -3.683681 | H  | -5.163671 | 0.445358  | -3.769496 |
| H | -2.973882 | -2.430321 | -3.051733 | C  | -3.618689 | 1.175732  | -2.581320 |
| C | -3.882491 | -5.777244 | 0.510155  | H  | -2.919231 | 0.618607  | -3.205879 |
| H | -4.487024 | -5.179766 | 1.205628  | C  | -3.000925 | 1.869089  | -1.453432 |
| H | -4.541003 | -6.081707 | -0.310806 | H  | -3.657850 | 2.442139  | -0.804551 |
| H | -3.567924 | -6.679627 | 1.045450  | C  | -1.619707 | 2.116109  | -1.385273 |
| C | 2.809259  | -2.985723 | -4.621710 | H  | -0.972073 | 1.807676  | -2.205155 |
| C | 4.159050  | -2.407438 | -5.058252 | H  | -1.234869 | 2.946492  | -0.797449 |
| C | 4.199393  | -0.909428 | -4.748011 | C  | -0.355759 | -3.390632 | 5.576530  |
| C | 4.112913  | -0.679590 | -3.233415 | C  | -0.659995 | -2.182860 | 6.208471  |
| H | 5.118165  | -0.451375 | -5.133804 | C  | -1.481695 | -1.252487 | 5.575571  |
| H | 4.975870  | -2.911065 | -4.521548 | C  | -2.012665 | -1.486218 | 4.288857  |
| H | 4.318286  | -2.596248 | -6.126675 | C  | -1.708352 | -2.718630 | 3.676653  |
| H | 2.044784  | -2.692177 | -5.357205 | C  | -0.891398 | -3.651724 | 4.313032  |
| H | 2.834782  | -4.083155 | -4.642023 | H  | 0.279054  | -4.123651 | 6.067103  |
| H | 5.075241  | -0.968299 | -2.789014 | H  | -0.264666 | -1.968296 | 7.198256  |
| H | 3.999867  | 0.388848  | -3.018348 | H  | -1.723135 | -0.319434 | 6.080671  |
| H | 3.359959  | -0.409888 | -5.252247 | H  | -2.133531 | -2.968140 | 2.712042  |
| H | 5.086402  | 3.070663  | 0.872859  | H  | -0.679978 | -4.595892 | 3.818351  |
| C | 6.700632  | 0.935525  | 0.777570  | C  | -2.871183 | -0.446746 | 3.706632  |



|   |           |           |           |   |          |           |           |
|---|-----------|-----------|-----------|---|----------|-----------|-----------|
| H | -3.269224 | 0.240419  | 4.453731  | H | 4.282169 | -3.262541 | 2.920718  |
| C | -3.228359 | -0.171419 | 2.428507  | C | 4.121224 | -2.874711 | -2.454030 |
| H | -3.904509 | 0.677558  | 2.313710  | H | 5.117759 | -2.571790 | -2.802876 |
| C | -2.886365 | -0.807632 | 1.155131  | H | 3.921236 | -3.861098 | -2.887233 |
| H | -2.241679 | -1.679287 | 1.153365  | H | 3.410598 | -2.160929 | -2.874340 |
| C | -3.659251 | -0.530072 | 0.022206  | C | 4.945171 | -5.602782 | 1.679234  |
| H | -4.550585 | 0.087943  | 0.099917  | H | 5.634254 | -5.445658 | 2.517233  |
| H | -3.633677 | -1.195277 | -0.835642 | H | 4.076600 | -6.145140 | 2.076319  |

### IM9a

SCF energy in Ethanol: -2812.675764 a.u.

Free energy in Ethanol: -2811.750213 a.u.

|   |           |           |           |   |           |           |           |
|---|-----------|-----------|-----------|---|-----------|-----------|-----------|
| P | -0.413957 | -1.317531 | -0.133234 | H | 3.925736  | 0.115699  | 1.818084  |
| N | -0.084955 | -2.711170 | -1.039004 | H | 2.419763  | -0.656890 | 2.309110  |
| C | 0.162193  | -3.952976 | -0.307681 | H | 3.912993  | -0.996368 | 3.199765  |
| H | -0.332258 | -4.791951 | -0.816577 | C | -3.441293 | 0.740439  | -1.520487 |
| H | 1.237469  | -4.172158 | -0.239475 | C | -4.435334 | 0.481444  | -0.547762 |
| H | -0.241403 | -3.877658 | 0.707114  | C | -3.611311 | 0.244301  | -2.834481 |
| C | 0.390625  | -2.748789 | -2.418895 | C | -5.544743 | -0.305578 | -0.895732 |
| H | 0.285130  | -1.770026 | -2.884265 | C | -4.741701 | -0.520818 | -3.139594 |
| H | 1.441510  | -3.057338 | -2.465789 | C | -5.719812 | -0.815696 | -2.185814 |
| H | -0.202816 | -3.475258 | -2.992536 | H | -6.298583 | -0.508547 | -0.136952 |
| O | -0.781829 | -0.351328 | -1.477848 | H | -4.861578 | -0.894361 | -4.154952 |
| O | 1.063221  | -0.594758 | 0.299961  | C | -2.604807 | 0.532470  | -3.925143 |
| C | -0.938084 | 1.001350  | -1.201570 | H | -2.328542 | 1.592303  | -3.947335 |
| C | 0.210284  | 1.771422  | -0.971609 | H | -1.682011 | -0.037917 | -3.771908 |
| C | -2.231643 | 1.550391  | -1.174010 | H | -3.009593 | 0.264699  | -4.906342 |
| C | 0.061968  | 3.099748  | -0.497191 | C | -4.353967 | 1.039035  | 0.857189  |
| C | 1.556550  | 1.171825  | -1.249342 | H | -3.337288 | 1.017408  | 1.257849  |
| C | -2.333478 | 2.896831  | -0.818751 | H | -4.688788 | 2.083952  | 0.888583  |
| C | -1.225798 | 3.661807  | -0.433083 | H | -5.001343 | 0.472173  | 1.534466  |
| C | 1.951238  | -0.004674 | -0.582524 | C | -6.947659 | -1.619075 | -2.548983 |
| C | 2.420273  | 1.748346  | -2.213719 | H | -7.363643 | -2.134582 | -1.676607 |
| H | -3.318145 | 3.358994  | -0.805795 | H | -7.739524 | -0.972966 | -2.951402 |
| C | 3.235727  | -0.563161 | -0.756876 | H | -6.724960 | -2.370296 | -3.314739 |
| C | 3.724055  | 1.240375  | -2.356186 | C | -1.468890 | 5.072041  | 0.084018  |
| C | 4.105801  | 0.122501  | -1.611132 | C | -0.193867 | 5.912877  | 0.204200  |
| C | 3.684634  | -1.846581 | -0.125215 | C | 0.907699  | 5.083702  | 0.869068  |
| C | 4.071113  | -2.938624 | -0.939337 | C | 1.275021  | 3.886425  | -0.016488 |
| C | 3.786583  | -1.974286 | 1.281696  | H | 1.803390  | 5.691096  | 1.047135  |
| C | 4.471274  | -4.139296 | -0.335459 | H | 0.141095  | 6.231980  | -0.793621 |
| C | 4.203767  | -3.186109 | 1.837636  | H | -0.403222 | 6.825741  | 0.774934  |
| C | 4.533902  | -4.292390 | 1.049131  | H | -1.938408 | 5.000068  | 1.076620  |
| H | 4.752323  | -4.974763 | -0.974608 | H | -2.204094 | 5.573750  | -0.559240 |
|   |           |           |           | H | 1.852591  | 4.257176  | -0.874781 |
|   |           |           |           | H | 1.946083  | 3.211705  | 0.525530  |

|    |           |           |           |                                           |           |           |           |
|----|-----------|-----------|-----------|-------------------------------------------|-----------|-----------|-----------|
| H  | 0.564296  | 4.730370  | 1.850125  |                                           |           |           |           |
| H  | 5.116723  | -0.260961 | -1.728575 | <b>IM9b</b>                               |           |           |           |
| C  | 4.743704  | 1.882438  | -3.285743 | SCF energy in Ethanol: -2812.678274 a.u.  |           |           |           |
| H  | 5.390562  | 2.547560  | -2.692405 | Free energy in Ethanol: -2811.753964 a.u. |           |           |           |
| H  | 5.406171  | 1.109133  | -3.694315 | P                                         | -0.404612 | -1.308092 | -0.381019 |
| C  | 1.914672  | 2.805054  | -3.189715 | N                                         | -0.161953 | -2.526037 | -1.515210 |
| C  | 4.111192  | 2.698828  | -4.417749 | C                                         | -0.162218 | -3.912038 | -1.060902 |
| H  | 3.659833  | 2.022664  | -5.157784 | H                                         | -0.844155 | -4.513067 | -1.678538 |
| H  | 4.884786  | 3.272827  | -4.942430 | H                                         | 0.844956  | -4.349203 | -1.119849 |
| C  | 3.029018  | 3.623127  | -3.853476 | H                                         | -0.504325 | -3.966520 | -0.023173 |
| H  | 1.355446  | 2.275421  | -3.977806 | C                                         | 0.161269  | -2.358411 | -2.926975 |
| H  | 1.185550  | 3.466943  | -2.720839 | H                                         | 0.259696  | -1.302197 | -3.173812 |
| H  | 3.479727  | 4.305364  | -3.117913 | H                                         | 1.098319  | -2.871461 | -3.173879 |
| H  | 2.600220  | 4.250702  | -4.644459 | H                                         | -0.637458 | -2.788311 | -3.549785 |
| Ni | -1.696987 | -1.737784 | 1.528799  | O                                         | -0.904791 | -0.144523 | -1.508922 |
| C  | 2.155708  | 3.373419  | 4.410995  | O                                         | 1.082602  | -0.629214 | 0.044914  |
| C  | 1.012773  | 3.855688  | 5.054209  | C                                         | -0.982614 | 1.164252  | -1.052811 |
| C  | -0.213025 | 3.222163  | 4.865654  | C                                         | 0.209619  | 1.875879  | -0.865454 |
| C  | -0.335354 | 2.081806  | 4.043817  | C                                         | -2.244065 | 1.738710  | -0.816829 |
| C  | 0.822063  | 1.623744  | 3.384737  | C                                         | 0.165439  | 3.137314  | -0.220195 |
| C  | 2.048942  | 2.261154  | 3.572061  | C                                         | 1.496334  | 1.278915  | -1.347673 |
| H  | 3.114960  | 3.864288  | 4.552949  | C                                         | -2.255250 | 3.032287  | -0.290326 |
| H  | 1.076597  | 4.726392  | 5.702395  | C                                         | -1.085009 | 3.717073  | 0.058849  |
| H  | -1.098342 | 3.601847  | 5.371436  | C                                         | 1.917228  | 0.039429  | -0.833746 |
| H  | 0.747321  | 0.793477  | 2.691536  | C                                         | 2.283060  | 1.927621  | -2.331229 |
| H  | 2.927359  | 1.891056  | 3.051051  | H                                         | -3.214693 | 3.514179  | -0.115311 |
| C  | -1.657226 | 1.466732  | 3.900273  | C                                         | 3.177606  | -0.507418 | -1.148575 |
| H  | -2.478356 | 2.146994  | 4.127750  | C                                         | 3.548919  | 1.403970  | -2.649202 |
| C  | -2.025145 | 0.195727  | 3.596362  | C                                         | 3.976993  | 0.225831  | -2.030708 |
| H  | -3.103973 | 0.032079  | 3.582164  | C                                         | 3.673979  | -1.800740 | -0.581241 |
| C  | -1.266700 | -1.034924 | 3.363566  | C                                         | 3.975781  | -2.891276 | -1.427884 |
| H  | -0.197390 | -1.025250 | 3.562950  | C                                         | 3.904093  | -1.923118 | 0.810488  |
| C  | -1.986170 | -2.263480 | 3.381618  | C                                         | 4.425852  | -4.093458 | -0.864639 |
| H  | -3.040122 | -2.268190 | 3.666412  | C                                         | 4.367682  | -3.136455 | 1.324709  |
| H  | -1.456469 | -3.193110 | 3.596134  | C                                         | 4.617632  | -4.244101 | 0.508505  |
| C  | -3.488801 | -4.949998 | 0.731943  | H                                         | 4.642136  | -4.930877 | -1.526260 |
| H  | -2.565027 | -4.942162 | 1.319093  | H                                         | 4.546841  | -3.214402 | 2.395678  |
| H  | -4.334782 | -4.933297 | 1.426577  | C                                         | 3.881028  | -2.815658 | -2.938587 |
| H  | -3.526901 | -5.881811 | 0.156016  | H                                         | 4.849309  | -2.543805 | -3.380957 |
| C  | -3.540633 | -3.755726 | -0.204000 | H                                         | 3.603802  | -3.789012 | -3.358965 |
| H  | -2.712810 | -3.778056 | -0.923595 | H                                         | 3.158674  | -2.071950 | -3.278968 |
| H  | -4.484676 | -3.746291 | -0.763859 | C                                         | 5.077802  | -5.557091 | 1.098408  |
| O  | -3.461544 | -2.548420 | 0.579550  | H                                         | 5.803459  | -5.401939 | 1.905181  |
| H  | -3.761984 | -1.803738 | 0.025791  | H                                         | 4.236866  | -6.118984 | 1.527009  |

|   |           |           |           |                                           |           |           |           |
|---|-----------|-----------|-----------|-------------------------------------------|-----------|-----------|-----------|
| H | 5.545321  | -6.195443 | 0.341130  | H                                         | 4.512221  | 3.646854  | -5.141894 |
| C | 3.696228  | -0.760337 | 1.751620  | C                                         | 2.797206  | 3.942058  | -3.828724 |
| H | 4.090064  | 0.172443  | 1.333047  | H                                         | 1.061963  | 2.670866  | -3.909652 |
| H | 2.633682  | -0.602907 | 1.962629  | H                                         | 1.076639  | 3.726402  | -2.525594 |
| H | 4.204877  | -0.945543 | 2.703478  | H                                         | 3.349831  | 4.528002  | -3.079679 |
| C | -3.520100 | 1.024678  | -1.135380 | H                                         | 2.317347  | 4.662927  | -4.502116 |
| C | -4.433852 | 0.691147  | -0.108612 | Ni                                        | -1.724707 | -1.794167 | 1.253028  |
| C | -3.843198 | 0.715797  | -2.478783 | C                                         | 1.207547  | 3.307421  | 5.273883  |
| C | -5.625300 | 0.027754  | -0.441207 | C                                         | 2.353334  | 2.562695  | 4.981968  |
| C | -5.050049 | 0.069555  | -2.764144 | C                                         | 2.248035  | 1.211248  | 4.659849  |
| C | -5.958482 | -0.285660 | -1.762395 | C                                         | 0.998583  | 0.560637  | 4.600901  |
| H | -6.321102 | -0.226148 | 0.356864  | C                                         | -0.141723 | 1.322189  | 4.929352  |
| H | -5.290152 | -0.154945 | -3.801765 | C                                         | -0.038036 | 2.674328  | 5.253785  |
| C | -2.923140 | 1.086685  | -3.619503 | H                                         | 1.286247  | 4.359924  | 5.533635  |
| H | -2.578066 | 2.123095  | -3.536223 | H                                         | 3.332529  | 3.034704  | 5.010715  |
| H | -2.031611 | 0.450093  | -3.630633 | H                                         | 3.147341  | 0.641085  | 4.440350  |
| H | -3.433455 | 0.973207  | -4.581223 | H                                         | -1.112342 | 0.839807  | 4.965513  |
| C | -4.183634 | 1.048502  | 1.341204  | H                                         | -0.935518 | 3.232735  | 5.509738  |
| H | -3.141531 | 0.888153  | 1.629481  | C                                         | 0.957153  | -0.873533 | 4.268128  |
| H | -4.416909 | 2.102455  | 1.538491  | H                                         | 1.857320  | -1.419097 | 4.550728  |
| H | -4.817047 | 0.447191  | 2.001150  | C                                         | -0.014334 | -1.589716 | 3.650781  |
| C | -7.277392 | -0.941066 | -2.103541 | H                                         | 0.163588  | -2.662749 | 3.564182  |
| H | -7.689198 | -1.487409 | -1.248166 | C                                         | -1.273568 | -1.123946 | 3.070368  |
| H | -8.024834 | -0.193185 | -2.400675 | H                                         | -1.410075 | -0.044075 | 3.059766  |
| H | -7.175774 | -1.642823 | -2.939013 | C                                         | -2.451348 | -1.936772 | 3.039735  |
| C | -1.217240 | 5.056956  | 0.767572  | H                                         | -2.409575 | -2.947110 | 3.455907  |
| C | 0.094150  | 5.845912  | 0.842714  | H                                         | -3.427775 | -1.459112 | 3.142974  |
| C | 1.231593  | 4.914782  | 1.269910  | O                                         | -3.224558 | -2.645195 | 0.036676  |
| C | 1.453511  | 3.828799  | 0.209061  | H                                         | -3.680637 | -1.865006 | -0.331421 |
| H | 2.163263  | 5.475037  | 1.415696  | C                                         | -4.213815 | -3.525013 | 0.609446  |
| H | 0.328243  | 6.279906  | -0.140293 | H                                         | -3.640551 | -4.296143 | 1.128068  |
| H | -0.015868 | 6.684414  | 1.541029  | H                                         | -4.798655 | -2.980740 | 1.360678  |
| H | -1.577180 | 4.874349  | 1.791478  | C                                         | -5.104858 | -4.131980 | -0.464650 |
| H | -1.998975 | 5.652471  | 0.277521  | H                                         | -5.828518 | -4.820366 | -0.011939 |
| H | 1.944301  | 4.290331  | -0.659307 | H                                         | -5.664723 | -3.355389 | -0.998034 |
| H | 2.157097  | 3.075603  | 0.580463  | H                                         | -4.507223 | -4.687365 | -1.194948 |
| H | 0.986309  | 4.450842  | 2.234989  |                                           |           |           |           |
| H | 4.967173  | -0.157639 | -2.266922 | <b>TS7a</b>                               |           |           |           |
| C | 4.488875  | 2.101168  | -3.622752 | SCF energy in Ethanol: -3455.868554 a.u.  |           |           |           |
| H | 5.225762  | 2.680959  | -3.045024 | Free energy in Ethanol: -3454.687042 a.u. |           |           |           |
| H | 5.068206  | 1.350496  | -4.175071 | P                                         | 0.219717  | 0.147926  | -0.524718 |
| C | 1.723272  | 3.094578  | -3.136825 | N                                         | 0.878271  | 0.788637  | -1.922270 |
| C | 3.774871  | 3.047071  | -4.594358 | C                                         | 2.112677  | 1.571415  | -1.828142 |
| H | 3.220493  | 2.463438  | -5.343167 | H                                         | 2.835880  | 1.226716  | -2.575692 |

|   |           |           |           |    |           |           |           |
|---|-----------|-----------|-----------|----|-----------|-----------|-----------|
| H | 1.910009  | 2.637874  | -1.985661 | C  | -0.112635 | -5.796006 | -0.944084 |
| H | 2.573888  | 1.447783  | -0.850429 | C  | -0.467895 | -4.902946 | -3.131606 |
| C | 0.264648  | 0.811558  | -3.249020 | C  | 0.103614  | -5.887126 | -2.318036 |
| H | -0.727434 | 0.366145  | -3.226797 | H  | 0.311389  | -6.554680 | -0.288461 |
| H | 0.182061  | 1.842178  | -3.612631 | H  | -0.336331 | -4.964230 | -4.210550 |
| H | 0.889552  | 0.249969  | -3.957553 | C  | -1.847132 | -2.861278 | -3.565459 |
| O | -0.840287 | -0.890337 | -1.306795 | H  | -2.906052 | -2.693693 | -3.338544 |
| O | -0.843800 | 1.252612  | 0.170747  | H  | -1.348100 | -1.887907 | -3.517282 |
| C | -2.057776 | -1.308287 | -0.778763 | H  | -1.774942 | -3.224668 | -4.595428 |
| C | -3.048582 | -0.354346 | -0.495348 | C  | -1.064877 | -4.770202 | 1.127616  |
| C | -2.299774 | -2.689984 | -0.645478 | H  | -1.209999 | -3.766533 | 1.530330  |
| C | -4.207965 | -0.754816 | 0.217955  | H  | -1.945802 | -5.362991 | 1.409469  |
| C | -2.918396 | 1.053408  | -0.999843 | H  | -0.202537 | -5.224989 | 1.628174  |
| C | -3.502874 | -3.053189 | -0.034348 | C  | 0.927080  | -7.005129 | -2.914626 |
| C | -4.421604 | -2.122139 | 0.460499  | H  | 1.135726  | -7.786391 | -2.176502 |
| C | -1.844764 | 1.856777  | -0.584660 | H  | 0.413978  | -7.472384 | -3.763779 |
| C | -3.869819 | 1.585897  | -1.906308 | H  | 1.891942  | -6.636911 | -3.287728 |
| H | -3.724327 | -4.112458 | 0.072064  | C  | -5.621400 | -2.628913 | 1.244686  |
| C | -1.763689 | 3.229318  | -0.893764 | C  | -6.744871 | -1.596593 | 1.376047  |
| C | -3.822311 | 2.957589  | -2.214162 | C  | -6.151938 | -0.251524 | 1.802046  |
| C | -2.804039 | 3.747055  | -1.673548 | C  | -5.204240 | 0.284084  | 0.720603  |
| C | -0.650947 | 4.132621  | -0.454916 | H  | -6.942698 | 0.486223  | 1.985875  |
| C | 0.132541  | 4.818728  | -1.415394 | H  | -7.264981 | -1.482357 | 0.413770  |
| C | -0.414297 | 4.376913  | 0.918959  | H  | -7.490526 | -1.946653 | 2.100137  |
| C | 1.156945  | 5.671208  | -0.985703 | H  | -5.282955 | -2.909675 | 2.253646  |
| C | 0.611428  | 5.247503  | 1.299567  | H  | -5.993607 | -3.553293 | 0.783882  |
| C | 1.423779  | 5.894121  | 0.365505  | H  | -5.811110 | 0.657541  | -0.115493 |
| H | 1.759789  | 6.179868  | -1.736016 | H  | -4.657848 | 1.153763  | 1.100727  |
| H | 0.771361  | 5.431864  | 2.360448  | H  | -5.607200 | -0.374656 | 2.746621  |
| C | -0.096766 | 4.708567  | -2.909990 | H  | -2.793933 | 4.810373  | -1.900503 |
| H | -0.752089 | 5.512678  | -3.271363 | C  | -4.868926 | 3.622342  | -3.097475 |
| H | 0.850122  | 4.803230  | -3.452480 | H  | -5.613677 | 4.111614  | -2.450479 |
| H | -0.566157 | 3.766223  | -3.196632 | H  | -4.401253 | 4.428809  | -3.675828 |
| C | 2.555578  | 6.794385  | 0.802190  | C  | -4.846752 | 0.677932  | -2.645766 |
| H | 2.335779  | 7.280368  | 1.759106  | C  | -5.594010 | 2.645864  | -4.028982 |
| H | 3.486129  | 6.225660  | 0.934088  | H  | -4.918608 | 2.329170  | -4.836369 |
| H | 2.755808  | 7.576332  | 0.061731  | H  | -6.445046 | 3.147012  | -4.505954 |
| C | -1.259371 | 3.751164  | 2.002426  | C  | -6.051730 | 1.415259  | -3.242035 |
| H | -2.303789 | 3.644488  | 1.692157  | H  | -4.287461 | 0.202912  | -3.467755 |
| H | -0.893046 | 2.752175  | 2.258541  | H  | -5.181367 | -0.147754 | -2.015597 |
| H | -1.232677 | 4.358543  | 2.912996  | H  | -6.732532 | 1.729685  | -2.437489 |
| C | -1.411525 | -3.759705 | -1.204907 | H  | -6.618011 | 0.729205  | -3.883615 |
| C | -0.862775 | -4.758856 | -0.372247 | Ni | 1.661198  | -0.442516 | 1.028795  |
| C | -1.220984 | -3.850288 | -2.607561 | C  | -4.214109 | 1.048989  | 5.095726  |

|   |           |           |           |                                           |           |           |           |
|---|-----------|-----------|-----------|-------------------------------------------|-----------|-----------|-----------|
| C | -4.096891 | -0.245635 | 5.608150  | H                                         | 6.613904  | -0.142152 | -1.604018 |
| C | -3.181452 | -1.136364 | 5.051785  | C                                         | 5.440760  | 3.353613  | -0.442444 |
| C | -2.347328 | -0.758986 | 3.979338  | H                                         | 4.226277  | 2.305933  | 0.982758  |
| C | -2.504084 | 0.536657  | 3.453091  | C                                         | 6.370100  | 3.247970  | -1.479715 |
| C | -3.419174 | 1.429489  | 4.011596  | H                                         | 7.521926  | 1.887029  | -2.693484 |
| H | -4.924949 | 1.748347  | 5.527667  | H                                         | 5.115803  | 4.334343  | -0.100379 |
| H | -4.717539 | -0.560967 | 6.443146  | H                                         | 6.772157  | 4.142182  | -1.950571 |
| H | -3.088976 | -2.139279 | 5.462902  | O                                         | 4.442319  | -0.158827 | 1.913539  |
| H | -1.934442 | 0.829004  | 2.579555  | C                                         | 5.447516  | -0.341166 | 2.920044  |
| H | -3.518072 | 2.426470  | 3.590259  | H                                         | 5.061751  | -1.059946 | 3.654931  |
| C | -1.373391 | -1.740943 | 3.484401  | H                                         | 6.315419  | -0.798450 | 2.437078  |
| H | -1.662132 | -2.773588 | 3.680479  | C                                         | 5.812675  | 0.975754  | 3.593470  |
| C | -0.144384 | -1.575842 | 2.937107  | H                                         | 6.579143  | 0.806703  | 4.359775  |
| H | 0.399636  | -2.503578 | 2.751350  | H                                         | 6.203252  | 1.687294  | 2.860122  |
| C | 0.647482  | -0.367549 | 2.663792  | H                                         | 4.939720  | 1.426186  | 4.079677  |
| H | 0.151042  | 0.584991  | 2.835367  | H                                         | 3.247078  | -0.335676 | 2.218704  |
| C | 2.075552  | -0.427050 | 3.039032  |                                           |           |           |           |
| H | 2.368476  | -1.338999 | 3.570913  |                                           |           |           |           |
| H | 2.407469  | 0.463664  | 3.581876  |                                           |           |           |           |
| B | 4.723334  | -0.437206 | 0.417825  | <b>TS7b</b>                               |           |           |           |
| O | 3.343736  | -0.886362 | -0.059935 | SCF energy in Ethanol: -3455.868586 a.u.  |           |           |           |
| O | 5.574102  | -1.574337 | 0.201227  | Free energy in Ethanol: -3454.689922 a.u. |           |           |           |
| C | 3.508872  | -2.169135 | -0.743973 | P                                         | 0.196259  | 0.271990  | -0.707671 |
| C | 4.803470  | -2.744536 | -0.060960 | N                                         | 0.780070  | 1.035988  | -2.083413 |
| C | 3.697595  | -1.869210 | -2.238537 | C                                         | 1.906148  | 1.962455  | -1.909692 |
| H | 4.583985  | -1.254474 | -2.413604 | H                                         | 2.521162  | 1.952287  | -2.816310 |
| H | 3.786786  | -2.790968 | -2.823822 | H                                         | 1.564372  | 2.988183  | -1.725493 |
| H | 2.821940  | -1.321554 | -2.600576 | H                                         | 2.539914  | 1.646291  | -1.081094 |
| C | 2.271725  | -3.042203 | -0.555614 | C                                         | 0.041930  | 1.218199  | -3.333799 |
| H | 2.454707  | -4.048568 | -0.948901 | H                                         | -0.747812 | 0.474086  | -3.420810 |
| H | 1.995402  | -3.141391 | 0.498151  | H                                         | -0.406173 | 2.217280  | -3.404694 |
| H | 1.414215  | -2.637663 | -1.098721 | H                                         | 0.737802  | 1.093438  | -4.173447 |
| C | 4.508952  | -3.473950 | 1.265055  | O                                         | -0.842597 | -0.771420 | -1.507289 |
| H | 5.459301  | -3.664022 | 1.774953  | O                                         | -0.879244 | 1.285052  | 0.092758  |
| H | 3.884314  | -2.869315 | 1.928442  | C                                         | -2.016781 | -1.248814 | -0.930029 |
| H | 4.011096  | -4.436570 | 1.103046  | C                                         | -3.042910 | -0.338780 | -0.637647 |
| C | 5.630444  | -3.668227 | -0.962103 | C                                         | -2.174088 | -2.634119 | -0.732165 |
| H | 5.054801  | -4.549357 | -1.270368 | C                                         | -4.173648 | -0.778254 | 0.097266  |
| H | 5.977603  | -3.144559 | -1.855946 | C                                         | -2.951107 | 1.087519  | -1.089777 |
| H | 6.512908  | -4.015361 | -0.413966 | C                                         | -3.351209 | -3.042426 | -0.098053 |
| C | 5.319296  | 0.911233  | -0.250032 | C                                         | -4.319188 | -2.148681 | 0.369876  |
| C | 6.266200  | 0.837824  | -1.287091 | C                                         | -1.919931 | 1.900945  | -0.598455 |
| C | 4.934246  | 2.200350  | 0.162784  | C                                         | -3.912549 | 1.643503  | -1.969521 |
| C | 6.786678  | 1.982078  | -1.896990 | H                                         | -3.506574 | -4.107811 | 0.055330  |
|   |           |           |           | C                                         | -1.928513 | 3.300877  | -0.758910 |
|   |           |           |           | C                                         | -3.915243 | 3.032771  | -2.185075 |

|   |           |           |           |    |           |           |           |
|---|-----------|-----------|-----------|----|-----------|-----------|-----------|
| C | -2.963364 | 3.827980  | -1.538236 | C  | -5.201333 | 0.225382  | 0.607049  |
| C | -0.941508 | 4.214239  | -0.101062 | H  | -6.915093 | 0.373549  | 1.914233  |
| C | -0.116854 | 5.075007  | -0.860244 | H  | -7.193263 | -1.625962 | 0.374566  |
| C | -0.892414 | 4.281161  | 1.313469  | H  | -7.358671 | -2.077903 | 2.070861  |
| C | 0.783789  | 5.921125  | -0.198986 | H  | -5.114539 | -2.957527 | 2.181089  |
| C | 0.012657  | 5.149551  | 1.927643  | H  | -5.829774 | -3.636370 | 0.728269  |
| C | 0.876291  | 5.967160  | 1.191503  | H  | -5.843781 | 0.558827  | -0.219661 |
| H | 1.426497  | 6.566317  | -0.795328 | H  | -4.683433 | 1.125324  | 0.957383  |
| H | 0.035251  | 5.197025  | 3.014912  | H  | -5.524677 | -0.425431 | 2.650057  |
| C | -0.183671 | 5.165038  | -2.371573 | H  | -3.012618 | 4.907167  | -1.663676 |
| H | -0.875037 | 5.957236  | -2.689798 | C  | -4.961389 | 3.710842  | -3.058587 |
| H | 0.798352  | 5.412300  | -2.788755 | H  | -5.730256 | 4.153139  | -2.406126 |
| H | -0.529013 | 4.238693  | -2.833777 | H  | -4.502932 | 4.553555  | -3.591147 |
| C | 1.876795  | 6.864176  | 1.882302  | C  | -4.854313 | 0.745149  | -2.762498 |
| H | 1.472518  | 7.272985  | 2.815267  | C  | -5.643058 | 2.760445  | -4.048564 |
| H | 2.791725  | 6.314284  | 2.141636  | H  | -4.947142 | 2.505468  | -4.860373 |
| H | 2.172052  | 7.703562  | 1.243801  | H  | -6.502047 | 3.259510  | -4.513259 |
| C | -1.832714 | 3.472541  | 2.178020  | C  | -6.074541 | 1.477842  | -3.332489 |
| H | -2.867791 | 3.550927  | 1.825331  | H  | -4.277140 | 0.323327  | -3.600713 |
| H | -1.566902 | 2.410786  | 2.182094  | H  | -5.169282 | -0.117078 | -2.170923 |
| H | -1.802526 | 3.830362  | 3.212602  | H  | -6.771278 | 1.731164  | -2.520039 |
| C | -1.211491 | -3.672351 | -1.219788 | H  | -6.615479 | 0.811519  | -4.015371 |
| C | -0.589786 | -4.563465 | -0.318172 | Ni | 1.643778  | -0.605072 | 0.660590  |
| C | -1.013104 | -3.847903 | -2.612447 | C  | -3.927485 | -2.367111 | 5.145609  |
| C | 0.238141  | -5.579133 | -0.817137 | C  | -4.112466 | -0.982277 | 5.188680  |
| C | -0.188178 | -4.880532 | -3.062687 | C  | -3.090266 | -0.126715 | 4.782231  |
| C | 0.456798  | -5.756110 | -2.182185 | C  | -1.858245 | -0.623649 | 4.311807  |
| H | 0.718181  | -6.254278 | -0.110536 | C  | -1.682448 | -2.021569 | 4.297980  |
| H | -0.053844 | -5.012091 | -4.134982 | C  | -2.705059 | -2.878995 | 4.703507  |
| C | -1.704905 | -2.971829 | -3.633048 | H  | -4.718092 | -3.037362 | 5.472431  |
| H | -2.775025 | -2.870062 | -3.419909 | H  | -5.050568 | -0.568127 | 5.549833  |
| H | -1.280846 | -1.961734 | -3.646161 | H  | -3.240281 | 0.949665  | 4.826882  |
| H | -1.598393 | -3.393216 | -4.637655 | H  | -0.725121 | -2.437239 | 4.004377  |
| C | -0.798569 | -4.497766 | 1.180635  | H  | -2.538050 | -3.953217 | 4.691656  |
| H | -1.119086 | -3.511106 | 1.518082  | C  | -0.805804 | 0.336741  | 3.941164  |
| H | -1.567851 | -5.211568 | 1.505623  | H  | -0.898895 | 1.300830  | 4.440921  |
| H | 0.123987  | -4.762182 | 1.709882  | C  | 0.242027  | 0.198988  | 3.098241  |
| C | 1.366144  | -6.846658 | -2.699138 | H  | 0.930336  | 1.044011  | 3.055101  |
| H | 1.557639  | -7.605561 | -1.933408 | C  | 0.590523  | -0.946388 | 2.232964  |
| H | 0.934295  | -7.348813 | -3.572710 | H  | -0.241190 | -1.612163 | 2.007410  |
| H | 2.338706  | -6.441844 | -3.010093 | C  | 1.911352  | -1.579980 | 2.427942  |
| C | -5.484501 | -2.696332 | 1.178394  | H  | 2.380477  | -1.327944 | 3.386287  |
| C | -6.645303 | -1.707659 | 1.324571  | H  | 1.940567  | -2.660715 | 2.262454  |
| C | -6.099126 | -0.333167 | 1.718999  | B  | 4.668684  | -0.335487 | 0.255170  |

|                                           |          |           |           |   |           |           |           |
|-------------------------------------------|----------|-----------|-----------|---|-----------|-----------|-----------|
| O                                         | 3.367484 | -0.693243 | -0.446701 | P | 0.174735  | 0.385062  | -0.677617 |
| O                                         | 5.629896 | -1.285462 | -0.230871 | N | 0.651056  | 1.162024  | -2.075005 |
| C                                         | 3.683619 | -1.675021 | -1.485357 | C | 1.738696  | 2.143976  | -2.015619 |
| C                                         | 4.978804 | -2.358273 | -0.910557 | H | 2.410602  | 1.994392  | -2.867931 |
| C                                         | 3.948470 | -0.902073 | -2.786453 | H | 1.345204  | 3.166951  | -2.044498 |
| H                                         | 4.778220 | -0.199549 | -2.673505 | H | 2.330375  | 2.016422  | -1.110103 |
| H                                         | 4.174479 | -1.583777 | -3.613724 | C | -0.076621 | 1.158631  | -3.344338 |
| H                                         | 3.049556 | -0.338164 | -3.049426 | H | -0.856123 | 0.399701  | -3.336338 |
| C                                         | 2.509375 | -2.624845 | -1.695192 | H | -0.534347 | 2.135798  | -3.543282 |
| H                                         | 2.787575 | -3.416212 | -2.401103 | H | 0.625649  | 0.935169  | -4.158206 |
| H                                         | 2.185744 | -3.101843 | -0.767724 | O | -0.745972 | -0.798232 | -1.404492 |
| H                                         | 1.653109 | -2.094864 | -2.121137 | O | -0.985389 | 1.292062  | 0.118820  |
| C                                         | 4.667667 | -3.491449 | 0.087074  | C | -1.881624 | -1.362182 | -0.818737 |
| H                                         | 5.597753 | -3.778957 | 0.588892  | C | -2.989657 | -0.545392 | -0.550602 |
| H                                         | 3.953968 | -3.172484 | 0.850751  | C | -1.915050 | -2.751602 | -0.605254 |
| H                                         | 4.262398 | -4.377705 | -0.414240 | C | -4.077794 | -1.074857 | 0.190613  |
| C                                         | 5.936740 | -2.890639 | -1.982231 | C | -3.037970 | 0.870756  | -1.038235 |
| H                                         | 5.459133 | -3.658635 | -2.602635 | C | -3.048438 | -3.255499 | 0.038076  |
| H                                         | 6.293542 | -2.086284 | -2.629438 | C | -4.094480 | -2.446465 | 0.492267  |
| H                                         | 6.809026 | -3.342094 | -1.497291 | C | -2.087337 | 1.789844  | -0.575510 |
| C                                         | 5.150507 | 1.197652  | 0.087654  | C | -4.054500 | 1.316470  | -1.919526 |
| C                                         | 6.244729 | 1.523672  | -0.732284 | H | -3.107054 | -4.328918 | 0.202906  |
| C                                         | 4.494096 | 2.267108  | 0.725148  | C | -2.227755 | 3.177940  | -0.758906 |
| C                                         | 6.658172 | 2.845263  | -0.920445 | C | -4.193479 | 2.695791  | -2.155532 |
| H                                         | 6.785844 | 0.716467  | -1.219541 | C | -3.316302 | 3.590717  | -1.533594 |
| C                                         | 4.890545 | 3.593768  | 0.538707  | C | -1.317085 | 4.186627  | -0.132364 |
| H                                         | 3.656304 | 2.057036  | 1.388434  | C | -0.571905 | 5.088439  | -0.923865 |
| C                                         | 5.977493 | 3.887825  | -0.288357 | C | -1.258908 | 4.293152  | 1.279615  |
| H                                         | 7.513072 | 3.062057  | -1.557783 | C | 0.261321  | 6.024374  | -0.296118 |
| H                                         | 4.353892 | 4.396717  | 1.040104  | C | -0.421644 | 5.248899  | 1.859752  |
| H                                         | 6.294049 | 4.918306  | -0.433022 | C | 0.363369  | 6.115469  | 1.091541  |
| O                                         | 4.283350 | -0.580024 | 1.740654  | H | 0.842935  | 6.703653  | -0.916742 |
| C                                         | 5.265175 | -0.943466 | 2.722638  | H | -0.388813 | 5.324930  | 2.944911  |
| H                                         | 4.859982 | -1.789790 | 3.292369  | C | -0.657874 | 5.121965  | -2.436335 |
| H                                         | 6.152061 | -1.297234 | 2.189024  | H | -1.433622 | 5.822309  | -2.774414 |
| C                                         | 5.593368 | 0.220094  | 3.649466  | H | 0.288328  | 5.461233  | -2.871171 |
| H                                         | 6.340153 | -0.089667 | 4.390950  | H | -0.903027 | 4.147910  | -2.864335 |
| H                                         | 5.993653 | 1.064970  | 3.082143  | C | 1.294308  | 7.108962  | 1.746413  |
| H                                         | 4.699102 | 0.559086  | 4.184611  | H | 0.854682  | 7.531186  | 2.657140  |
| H                                         | 3.133598 | -1.016259 | 1.871182  | H | 2.241284  | 6.634031  | 2.036062  |
|                                           |          |           |           | H | 1.536974  | 7.936437  | 1.071536  |
|                                           |          |           |           | C | -2.122273 | 3.433985  | 2.177112  |
| <b>IM10a</b>                              |          |           |           | H | -3.173860 | 3.463816  | 1.867964  |
| SCF energy in Ethanol: -3455.908753 a.u.  |          |           |           | H | -1.809545 | 2.384859  | 2.160193  |
| Free energy in Ethanol: -3454.719189 a.u. |          |           |           |   |           |           |           |

|   |           |           |           |    |           |           |           |
|---|-----------|-----------|-----------|----|-----------|-----------|-----------|
| H | -2.065887 | 3.784832  | 3.212398  | H  | -6.910735 | 1.115638  | -2.427473 |
| C | -0.889979 | -3.717989 | -1.115731 | H  | -6.689847 | 0.195103  | -3.914218 |
| C | -0.109816 | -4.481949 | -0.221300 | Ni | 1.847659  | -0.107304 | 0.644923  |
| C | -0.803865 | -3.967692 | -2.504940 | C  | -3.840882 | -1.333570 | 5.079350  |
| C | 0.743362  | -5.468671 | -0.731477 | C  | -3.204420 | -2.577914 | 5.078082  |
| C | 0.059143  | -4.965420 | -2.968245 | C  | -1.871223 | -2.679419 | 4.687068  |
| C | 0.845480  | -5.727913 | -2.099755 | C  | -1.135937 | -1.550050 | 4.272916  |
| H | 1.341217  | -6.052602 | -0.034451 | C  | -1.793351 | -0.304187 | 4.287807  |
| H | 0.109493  | -5.158302 | -4.038436 | C  | -3.126452 | -0.199808 | 4.683612  |
| C | -1.643835 | -3.200721 | -3.501953 | H  | -4.874463 | -1.245733 | 5.403615  |
| H | -2.704038 | -3.199393 | -3.223766 | H  | -3.742343 | -3.466806 | 5.398373  |
| H | -1.326804 | -2.153301 | -3.568663 | H  | -1.378092 | -3.648750 | 4.704781  |
| H | -1.556125 | -3.639737 | -4.500747 | H  | -1.245234 | 0.594225  | 4.029186  |
| C | -0.169263 | -4.265888 | 1.274473  | H  | -3.604001 | 0.776744  | 4.701376  |
| H | -0.047451 | -3.212308 | 1.544156  | C  | 0.285991  | -1.725927 | 3.936791  |
| H | -1.126161 | -4.590525 | 1.700736  | H  | 0.734335  | -2.597587 | 4.415874  |
| H | 0.623632  | -4.831327 | 1.774457  | C  | 1.112654  | -0.989973 | 3.156444  |
| C | 1.789368  | -6.783241 | -2.628390 | H  | 2.144821  | -1.329485 | 3.155461  |
| H | 1.999541  | -7.547948 | -1.873144 | C  | 0.797356  | 0.170252  | 2.273891  |
| H | 1.377802  | -7.283190 | -3.512344 | H  | -0.274179 | 0.186510  | 2.068249  |
| H | 2.752344  | -6.345206 | -2.924189 | C  | 1.205461  | 1.556335  | 2.804717  |
| C | -5.204622 | -3.086084 | 1.310109  | H  | 0.726754  | 1.761040  | 3.775504  |
| C | -6.454049 | -2.208972 | 1.438267  | H  | 0.889953  | 2.342894  | 2.111538  |
| C | -6.041031 | -0.780175 | 1.800338  | B  | 4.454309  | -0.159127 | 0.162970  |
| C | -5.200180 | -0.163984 | 0.674355  | O  | 3.275966  | -0.339784 | -0.788643 |
| H | -6.920674 | -0.150247 | 1.981409  | O  | 5.327930  | -1.269678 | -0.116838 |
| H | -7.008693 | -2.201222 | 0.488662  | C  | 3.625904  | -1.397147 | -1.729178 |
| H | -7.128181 | -2.628509 | 2.194800  | C  | 4.654738  | -2.253968 | -0.899344 |
| H | -4.812585 | -3.292953 | 2.316948  | C  | 4.273478  | -0.711762 | -2.943241 |
| H | -5.458420 | -4.062682 | 0.877625  | H  | 5.171213  | -0.158351 | -2.657065 |
| H | -5.872216 | 0.082407  | -0.159266 | H  | 4.538435  | -1.439891 | -3.717615 |
| H | -4.774896 | 0.791804  | 1.000979  | H  | 3.560080  | -0.003326 | -3.376384 |
| H | -5.459117 | -0.796275 | 2.730992  | C  | 2.379410  | -2.150400 | -2.174140 |
| H | -3.469659 | 4.657785  | -1.676942 | H  | 2.655344  | -2.988087 | -2.824315 |
| C | -5.311857 | 3.255808  | -3.023001 | H  | 1.812623  | -2.552549 | -1.332930 |
| H | -6.109695 | 3.631848  | -2.364002 | H  | 1.719190  | -1.490483 | -2.744356 |
| H | -4.944905 | 4.130494  | -3.574454 | C  | 3.968246  | -3.278227 | 0.023856  |
| C | -4.910476 | 0.319800  | -2.691582 | H  | 4.720823  | -3.697828 | 0.700025  |
| C | -5.914309 | 2.229133  | -3.988462 | H  | 3.192608  | -2.810269 | 0.635509  |
| H | -5.210928 | 2.031839  | -4.809887 | H  | 3.515198  | -4.099190 | -0.542536 |
| H | -6.825559 | 2.635975  | -4.443089 | C  | 5.700559  | -2.977227 | -1.756430 |
| C | -6.206163 | 0.920663  | -3.249143 | H  | 5.230376  | -3.682137 | -2.453021 |
| H | -4.304836 | -0.047530 | -3.535440 | H  | 6.306064  | -2.269130 | -2.327127 |
| H | -5.126256 | -0.565102 | -2.089401 | H  | 6.373967  | -3.544382 | -1.104732 |



|   |          |           |           |   |           |           |           |
|---|----------|-----------|-----------|---|-----------|-----------|-----------|
| C | 5.214332 | 1.267968  | 0.056990  | C | -3.988946 | 0.840857  | -2.172253 |
| C | 6.506800 | 1.351947  | -0.489803 | H | -3.226611 | -4.466333 | 0.701369  |
| C | 4.622127 | 2.478545  | 0.463965  | C | -2.144010 | 2.826695  | -1.269292 |
| C | 7.168422 | 2.573416  | -0.641101 | C | -4.094317 | 2.169419  | -2.619193 |
| H | 6.998824 | 0.431870  | -0.794337 | C | -3.209704 | 3.131709  | -2.121958 |
| C | 5.269287 | 3.707886  | 0.315341  | C | -1.236380 | 3.914243  | -0.786530 |
| H | 3.633453 | 2.461402  | 0.920997  | C | -0.488371 | 4.701436  | -1.691334 |
| C | 6.548766 | 3.759506  | -0.242649 | C | -1.195960 | 4.221580  | 0.596082  |
| H | 8.169342 | 2.600083  | -1.067120 | C | 0.341986  | 5.714234  | -1.192492 |
| H | 4.778998 | 4.623560  | 0.640096  | C | -0.362221 | 5.248826  | 1.043847  |
| H | 7.059231 | 4.712894  | -0.358632 | C | 0.433653  | 5.996554  | 0.170090  |
| O | 3.658059 | -0.277888 | 1.470773  | H | 0.928349  | 6.301580  | -1.896742 |
| C | 4.343035 | -0.091389 | 2.713910  | H | -0.343715 | 5.479101  | 2.107449  |
| H | 5.017881 | 0.766931  | 2.613845  | C | -0.569235 | 4.539343  | -3.196571 |
| H | 3.601536 | 0.160233  | 3.475995  | H | -1.351605 | 5.182119  | -3.622407 |
| C | 5.123936 | -1.333470 | 3.135070  | H | 0.374747  | 4.833010  | -3.667897 |
| H | 5.631241 | -1.143897 | 4.089582  | H | -0.799658 | 3.516491  | -3.500902 |
| H | 4.455390 | -2.192327 | 3.265561  | C | 1.360382  | 7.071139  | 0.689028  |
| H | 5.869582 | -1.594524 | 2.380636  | H | 0.905500  | 7.628275  | 1.516014  |
| H | 2.283001 | 1.656575  | 2.956593  | H | 2.296242  | 6.639287  | 1.068763  |

### IM10b

SCF energy in Ethanol: -3455.903510 a.u.

Free energy in Ethanol: -3454.717596 a.u.

|   |           |           |           |   |           |           |           |
|---|-----------|-----------|-----------|---|-----------|-----------|-----------|
| P | 0.193997  | 0.044571  | -0.763893 | H | -2.086563 | 4.036028  | 2.548904  |
| N | 0.646306  | 0.605671  | -2.272168 | C | -0.903064 | -4.056118 | -0.539533 |
| C | 1.675825  | 1.650674  | -2.355965 | C | -0.279044 | -4.751897 | 0.522688  |
| H | 2.270989  | 1.488347  | -3.261390 | C | -0.594638 | -4.412891 | -1.874071 |
| H | 1.229319  | 2.649955  | -2.396833 | C | 0.672368  | -5.736964 | 0.231454  |
| H | 2.355047  | 1.595313  | -1.507461 | C | 0.348714  | -5.416522 | -2.114896 |
| C | -0.138108 | 0.448874  | -3.498929 | C | 1.008048  | -6.082528 | -1.078750 |
| H | -0.827738 | -0.387929 | -3.407628 | H | 1.154787  | -6.256103 | 1.057723  |
| H | -0.712158 | 1.353747  | -3.735276 | H | 0.567885  | -5.690203 | -3.145365 |
| H | 0.550221  | 0.248725  | -4.329785 | C | -1.280605 | -3.767729 | -3.057592 |
| O | -0.731892 | -1.236612 | -1.290310 | H | -2.352262 | -3.626903 | -2.881124 |
| O | -0.951367 | 1.063458  | -0.092831 | H | -0.855300 | -2.781302 | -3.274139 |
| C | -1.891638 | -1.688043 | -0.662932 | H | -1.162566 | -4.384943 | -3.953941 |
| C | -2.983566 | -0.817387 | -0.532729 | C | -0.627459 | -4.509256 | 1.976893  |
| C | -1.961942 | -3.035878 | -0.258308 | H | -0.921542 | -3.475506 | 2.169970  |
| C | -4.098331 | -1.216171 | 0.249541  | H | -1.462667 | -5.146474 | 2.297061  |
| C | -2.994103 | 0.517271  | -1.215137 | H | 0.222919  | -4.749740 | 2.622759  |
| C | -3.131948 | -3.426234 | 0.399406  | C | 2.054797  | -7.133970 | -1.365207 |
| C | -4.167482 | -2.540321 | 0.712553  | H | 2.062570  | -7.913061 | -0.595136 |
| C | -2.034711 | 1.479382  | -0.871729 | H | 1.884685  | -7.615767 | -2.334106 |

|    |           |           |           |   |          |           |           |
|----|-----------|-----------|-----------|---|----------|-----------|-----------|
| H  | 3.061810  | -6.695963 | -1.391806 | C | 1.254372 | -1.575776 | 2.921440  |
| C  | -5.325347 | -3.045706 | 1.559667  | H | 0.621017 | -1.823990 | 3.786503  |
| C  | -6.539940 | -2.112249 | 1.557299  | H | 1.283938 | -2.459117 | 2.274279  |
| C  | -6.077286 | -0.669101 | 1.770173  | B | 4.463491 | -0.006227 | 0.241235  |
| C  | -5.192256 | -0.214410 | 0.602505  | O | 3.364213 | -0.424325 | -0.732080 |
| H  | -6.934095 | 0.009490  | 1.860145  | O | 5.479383 | -1.016077 | 0.100930  |
| H  | -7.070266 | -2.188711 | 0.597125  | C | 3.854951 | -1.554059 | -1.512717 |
| H  | -7.248397 | -2.420419 | 2.335534  | C | 4.964371 | -2.163280 | -0.571077 |
| H  | -4.974053 | -3.164586 | 2.596220  | C | 4.438021 | -0.968175 | -2.807836 |
| H  | -5.608281 | -4.052054 | 1.224284  | H | 5.255934 | -0.275206 | -2.593864 |
| H  | -5.835522 | -0.035081 | -0.269573 | H | 4.806619 | -1.755897 | -3.473847 |
| H  | -4.733324 | 0.753256  | 0.834042  | H | 3.653441 | -0.417912 | -3.336184 |
| H  | -5.515626 | -0.597828 | 2.711282  | C | 2.712107 | -2.507875 | -1.848665 |
| H  | -3.340363 | 4.166912  | -2.427781 | H | 3.097942 | -3.388628 | -2.375245 |
| C  | -5.185294 | 2.613275  | -3.583324 | H | 2.183941 | -2.854871 | -0.957837 |
| H  | -5.982245 | 3.105764  | -3.004852 | H | 1.987005 | -2.017829 | -2.505343 |
| H  | -4.787881 | 3.383070  | -4.256678 | C | 4.398039 | -3.161503 | 0.456755  |
| C  | -4.857707 | -0.244114 | -2.797939 | H | 5.180093 | -3.385571 | 1.189759  |
| C  | -5.800025 | 1.463782  | -4.388983 | H | 3.544930 | -2.744765 | 0.996820  |
| H  | -5.091565 | 1.126471  | -5.158846 | H | 4.088582 | -4.102120 | -0.013543 |
| H  | -6.695549 | 1.815275  | -4.915339 | C | 6.124095 | -2.830480 | -1.321051 |
| C  | -6.131833 | 0.291634  | -3.461715 | H | 5.778333 | -3.673353 | -1.932086 |
| H  | -4.251288 | -0.750015 | -3.566169 | H | 6.643905 | -2.117818 | -1.965522 |
| H  | -5.103799 | -1.020719 | -2.071300 | H | 6.848645 | -3.214836 | -0.595075 |
| H  | -6.842226 | 0.625543  | -2.691461 | C | 5.034873 | 1.491310  | 0.022957  |
| H  | -6.623782 | -0.517319 | -4.015226 | C | 6.340383 | 1.701089  | -0.454106 |
| Ni | 1.855812  | -0.262266 | 0.606953  | C | 4.255341 | 2.639518  | 0.259393  |
| C  | -3.912230 | 0.249191  | 5.488035  | C | 6.841476 | 2.983017  | -0.695183 |
| C  | -3.391392 | 1.527415  | 5.700192  | H | 6.971135 | 0.833871  | -0.631833 |
| C  | -2.163171 | 1.880711  | 5.147360  | C | 4.740058 | 3.926860  | 0.015540  |
| C  | -1.414303 | 0.981459  | 4.358603  | H | 3.244442 | 2.527397  | 0.650724  |
| C  | -1.958349 | -0.303898 | 4.158997  | C | 6.039793 | 4.102979  | -0.465072 |
| C  | -3.185533 | -0.661007 | 4.716548  | H | 7.858212 | 3.108992  | -1.061811 |
| H  | -4.864695 | -0.037209 | 5.925913  | H | 4.105212 | 4.790761  | 0.202448  |
| H  | -3.938771 | 2.247981  | 6.302544  | H | 6.424640 | 5.102669  | -0.653573 |
| H  | -1.763010 | 2.875961  | 5.327616  | O | 3.620715 | -0.110386 | 1.521731  |
| H  | -1.414863 | -1.039939 | 3.581793  | C | 4.177111 | 0.310301  | 2.771393  |
| H  | -3.569765 | -1.665496 | 4.555959  | H | 4.660172 | 1.284718  | 2.629417  |
| C  | -0.118390 | 1.452143  | 3.843250  | H | 3.351964 | 0.448722  | 3.474415  |
| H  | 0.170676  | 2.414677  | 4.266991  | C | 5.177505 | -0.698678 | 3.329383  |
| C  | 0.762183  | 0.923797  | 2.962962  | H | 5.578029 | -0.330991 | 4.282636  |
| H  | 1.661123  | 1.521606  | 2.821579  | H | 4.698490 | -1.667960 | 3.507553  |
| C  | 0.698733  | -0.346679 | 2.171486  | H | 6.004091 | -0.852645 | 2.631873  |
| H  | -0.339760 | -0.552430 | 1.892680  | H | 2.262975 | -1.409976 | 3.302110  |

**TS8a**

SCF energy in Ethanol: -3455.879954 a.u.

Free energy in Ethanol: -3454.696040 a.u.

|   |           |           |           |   |           |           |           |
|---|-----------|-----------|-----------|---|-----------|-----------|-----------|
| P | -0.095406 | 0.495880  | -0.659273 | H | -0.222686 | 7.863953  | 1.956963  |
| N | 0.116248  | 1.450983  | -2.012392 | C | -2.960190 | 2.646015  | 2.490050  |
| C | 1.114856  | 2.522355  | -1.985350 | H | -3.959336 | 2.421197  | 2.099597  |
| H | 1.752041  | 2.450380  | -2.874644 | H | -2.379000 | 1.718580  | 2.450148  |
| H | 0.630831  | 3.506814  | -1.970408 | H | -3.064505 | 2.922304  | 3.543746  |
| H | 1.764590  | 2.432259  | -1.113597 | C | -0.193218 | -3.648917 | -1.045271 |
| C | -0.653950 | 1.382890  | -3.252352 | C | 0.716079  | -4.049973 | -0.040872 |
| H | -1.342955 | 0.541106  | -3.229653 | C | 0.063530  | -3.972847 | -2.394826 |
| H | -1.226113 | 2.304951  | -3.415286 | C | 1.864171  | -4.759844 | -0.411411 |
| H | 0.033798  | 1.251804  | -4.099263 | C | 1.224998  | -4.684442 | -2.718207 |
| O | -0.769567 | -0.820873 | -1.446622 | C | 2.141176  | -5.086015 | -1.742604 |
| O | -1.416216 | 1.024503  | 0.233480  | H | 2.556994  | -5.074378 | 0.367008  |
| C | -1.764433 | -1.626140 | -0.894861 | H | 1.409608  | -4.941987 | -3.759563 |
| C | -3.036420 | -1.082501 | -0.658163 | C | -0.898485 | -3.578198 | -3.493426 |
| C | -1.485219 | -2.985940 | -0.678117 | H | -1.918258 | -3.919027 | -3.280201 |
| C | -4.025394 | -1.879605 | -0.020665 | H | -0.943125 | -2.488894 | -3.611417 |
| C | -3.341913 | 0.338526  | -1.023708 | H | -0.591491 | -4.006950 | -4.452608 |
| C | -2.511987 | -3.762941 | -0.138258 | C | 0.486786  | -3.719697 | 1.417284  |
| C | -3.754242 | -3.236220 | 0.227319  | H | 0.548095  | -2.640788 | 1.602057  |
| C | -2.594520 | 1.366281  | -0.427989 | H | -0.499561 | -4.039921 | 1.766926  |
| C | -4.402887 | 0.679820  | -1.898361 | H | 1.241900  | -4.199933 | 2.046929  |
| H | -2.322519 | -4.822012 | 0.022722  | C | 3.399843  | -5.836981 | -2.111775 |
| C | -2.999183 | 2.712724  | -0.468625 | H | 3.631955  | -6.615509 | -1.376316 |
| C | -4.804774 | 2.024450  | -1.989379 | H | 3.308522  | -6.314325 | -3.093126 |
| C | -4.133332 | 2.994173  | -1.237150 | H | 4.267257  | -5.164645 | -2.153433 |
| C | -2.310119 | 3.799372  | 0.295955  | C | -4.755590 | -4.154759 | 0.910011  |
| C | -1.739350 | 4.905786  | -0.371161 | C | -6.178221 | -3.589461 | 0.943299  |
| C | -2.295893 | 3.760419  | 1.712582  | C | -6.135989 | -2.134481 | 1.415355  |
| C | -1.122075 | 5.915535  | 0.378854  | C | -5.352890 | -1.267709 | 0.418872  |
| C | -1.682413 | 4.798796  | 2.417046  | H | -7.147348 | -1.726294 | 1.530289  |
| C | -1.073514 | 5.880002  | 1.771959  | H | -6.625656 | -3.635749 | -0.060048 |
| H | -0.672796 | 6.756126  | -0.147157 | H | -6.808612 | -4.200025 | 1.600717  |
| H | -1.683484 | 4.762210  | 3.504783  | H | -4.419368 | -4.330393 | 1.943060  |
| C | -1.793885 | 5.074380  | -1.875750 | H | -4.739904 | -5.136184 | 0.418765  |
| H | -2.697517 | 5.616730  | -2.185621 | H | -5.994562 | -1.097005 | -0.455019 |
| H | -0.936530 | 5.655949  | -2.231488 | H | -5.169812 | -0.274695 | 0.845205  |
| H | -1.803454 | 4.118103  | -2.402632 | H | -5.665775 | -2.091099 | 2.407237  |
| C | -0.379728 | 6.964862  | 2.562042  | H | -4.489857 | 4.021083  | -1.269855 |
| H | -0.959549 | 7.249473  | 3.447756  | C | -5.997556 | 2.452567  | -2.832450 |
| H | 0.604261  | 6.629693  | 2.915751  | H | -6.862263 | 2.592182  | -2.165352 |
|   |           |           |           | H | -5.800956 | 3.437943  | -3.273279 |
|   |           |           |           | C | -5.021776 | -0.363464 | -2.820730 |
|   |           |           |           | C | -6.376157 | 1.445705  | -3.924865 |
|   |           |           |           | H | -5.641169 | 1.487415  | -4.741266 |

|    |           |           |           |                                           |           |           |           |
|----|-----------|-----------|-----------|-------------------------------------------|-----------|-----------|-----------|
| H  | -7.346452 | 1.715334  | -4.358992 | H                                         | 7.162317  | 3.420093  | -1.201857 |
| C  | -6.407143 | 0.026934  | -3.349163 | C                                         | 5.115191  | 2.507306  | -2.871770 |
| H  | -4.344456 | -0.482426 | -3.681667 | H                                         | 5.997108  | 2.783813  | -3.460322 |
| H  | -5.051845 | -1.345583 | -2.344223 | H                                         | 4.564136  | 1.732704  | -3.413477 |
| H  | -7.145535 | -0.021419 | -2.535496 | H                                         | 4.467411  | 3.386956  | -2.794644 |
| H  | -6.727259 | -0.695754 | -4.109553 | C                                         | 3.726916  | -0.139468 | 1.205879  |
| Ni | 1.830565  | 0.235029  | 0.486198  | C                                         | 3.842381  | -1.528089 | 1.446567  |
| C  | -3.117429 | -2.046558 | 4.890512  | C                                         | 4.497006  | 0.701795  | 2.038771  |
| C  | -2.162457 | -2.103271 | 5.908492  | C                                         | 4.652078  | -2.045759 | 2.461024  |
| C  | -0.859820 | -1.675812 | 5.667280  | H                                         | 3.288375  | -2.229968 | 0.825365  |
| C  | -0.460784 | -1.168032 | 4.411464  | C                                         | 5.318372  | 0.202083  | 3.048920  |
| C  | -1.434741 | -1.140512 | 3.392729  | H                                         | 4.468578  | 1.774089  | 1.864886  |
| C  | -2.739937 | -1.567969 | 3.634271  | C                                         | 5.389973  | -1.178650 | 3.268330  |
| H  | -4.137052 | -2.377267 | 5.071986  | H                                         | 4.709467  | -3.120129 | 2.621911  |
| H  | -2.432514 | -2.481011 | 6.891798  | H                                         | 5.902693  | 0.881064  | 3.666699  |
| H  | -0.125141 | -1.720950 | 6.468378  | H                                         | 6.025227  | -1.573690 | 4.057786  |
| H  | -1.173937 | -0.802651 | 2.397734  | O                                         | 2.773310  | -0.124077 | -1.265535 |
| H  | -3.461046 | -1.533265 | 2.823550  | C                                         | 2.720206  | -1.369295 | -2.002313 |
| C  | 0.930042  | -0.718624 | 4.276184  | H                                         | 3.479753  | -2.051662 | -1.613359 |
| H  | 1.561652  | -1.076996 | 5.090097  | H                                         | 1.736192  | -1.798695 | -1.815974 |
| C  | 1.554535  | 0.100037  | 3.392719  | C                                         | 2.925335  | -1.130512 | -3.490737 |
| H  | 2.601305  | 0.277155  | 3.628252  | H                                         | 2.822411  | -2.080420 | -4.028873 |
| C  | 1.068284  | 0.855929  | 2.216061  | H                                         | 2.176630  | -0.432263 | -3.880481 |
| H  | -0.014319 | 0.773489  | 2.124439  | H                                         | 3.922978  | -0.728687 | -3.687749 |
| C  | 1.422908  | 2.352209  | 2.311505  |                                           |           |           |           |
| H  | 2.499786  | 2.514800  | 2.415278  | <b>TS8b</b>                               |           |           |           |
| H  | 0.936971  | 2.809580  | 3.186698  | SCF energy in Ethanol: -3455.866219 a.u.  |           |           |           |
| H  | 1.081279  | 2.908856  | 1.431616  | Free energy in Ethanol: -3454.681431 a.u. |           |           |           |
| B  | 4.044242  | 0.364771  | -0.770628 | P                                         | 0.127822  | 0.122648  | -0.760788 |
| O  | 5.187670  | -0.299887 | -1.244514 | N                                         | -0.064710 | -0.177429 | -2.390723 |
| O  | 4.254029  | 1.762122  | -0.758669 | C                                         | -0.902836 | -1.302255 | -2.812076 |
| C  | 6.254892  | 0.653208  | -1.420597 | H                                         | -1.600904 | -0.968330 | -3.588858 |
| C  | 5.487415  | 2.044890  | -1.452153 | H                                         | -0.286230 | -2.118963 | -3.208232 |
| C  | 6.988064  | 0.302341  | -2.720380 | H                                         | -1.498884 | -1.679881 | -1.979766 |
| H  | 7.443396  | -0.688836 | -2.623171 | C                                         | 0.601197  | 0.521824  | -3.487238 |
| H  | 6.312601  | 0.278546  | -3.578871 | H                                         | 1.291184  | 1.271403  | -3.105014 |
| H  | 7.788343  | 1.022541  | -2.927363 | H                                         | 1.157284  | -0.184844 | -4.113386 |
| C  | 7.237355  | 0.505688  | -0.248819 | H                                         | -0.146789 | 1.021347  | -4.119380 |
| H  | 8.105389  | 1.163960  | -0.367768 | O                                         | 0.657752  | 1.709719  | -0.922074 |
| H  | 6.762179  | 0.717517  | 0.710039  | O                                         | 1.521073  | -0.627492 | -0.204472 |
| H  | 7.594086  | -0.529155 | -0.220794 | C                                         | 1.478469  | 2.305105  | 0.033567  |
| C  | 6.203023  | 3.186362  | -0.724936 | C                                         | 2.785212  | 1.823028  | 0.190869  |
| H  | 5.580632  | 4.087172  | -0.758985 | C                                         | 1.003926  | 3.414731  | 0.756599  |
| H  | 6.386690  | 2.944141  | 0.324140  | C                                         | 3.574079  | 2.295155  | 1.269334  |

|   |           |           |           |   |           |           |           |
|---|-----------|-----------|-----------|---|-----------|-----------|-----------|
| C | 3.335750  | 0.821411  | -0.777516 | H | -2.087666 | 3.171289  | 3.252614  |
| C | 1.854711  | 3.929684  | 1.738870  | C | -4.036005 | 6.189357  | -0.256728 |
| C | 3.096049  | 3.363356  | 2.047602  | H | -4.490798 | 6.555704  | 0.669845  |
| C | 2.728538  | -0.438078 | -0.878141 | H | -3.894858 | 7.044424  | -0.926964 |
| C | 4.465181  | 1.116629  | -1.580672 | H | -4.765096 | 5.520193  | -0.733319 |
| H | 1.519634  | 4.796318  | 2.304125  | C | 3.873217  | 3.917145  | 3.232334  |
| C | 3.311603  | -1.495931 | -1.601905 | C | 5.331001  | 3.447937  | 3.284157  |
| C | 5.045071  | 0.086555  | -2.342083 | C | 5.397156  | 1.942107  | 3.019047  |
| C | 4.485756  | -1.194755 | -2.299498 | C | 4.905401  | 1.630728  | 1.599516  |
| C | 2.781163  | -2.895521 | -1.590478 | H | 6.419571  | 1.565023  | 3.141583  |
| C | 2.343699  | -3.530492 | -2.772142 | H | 5.923482  | 3.976813  | 2.523773  |
| C | 2.802522  | -3.625310 | -0.376710 | H | 5.768839  | 3.698819  | 4.257667  |
| C | 1.857956  | -4.843957 | -2.702501 | H | 3.367677  | 3.603519  | 4.158355  |
| C | 2.321045  | -4.935226 | -0.357368 | H | 3.820170  | 5.013671  | 3.221298  |
| C | 1.821958  | -5.558884 | -1.506320 | H | 5.678134  | 1.955434  | 0.888741  |
| H | 1.506481  | -5.319537 | -3.616810 | H | 4.813484  | 0.548018  | 1.458333  |
| H | 2.339941  | -5.482467 | 0.582635  | H | 4.774313  | 1.414775  | 3.755346  |
| C | 2.422003  | -2.878738 | -4.137469 | H | 4.972980  | -1.996211 | -2.850399 |
| H | 3.325210  | -3.200449 | -4.674231 | C | 6.302542  | 0.306304  | -3.171338 |
| H | 1.566290  | -3.164877 | -4.759350 | H | 7.164596  | -0.086642 | -2.610241 |
| H | 2.458715  | -1.790035 | -4.079603 | H | 6.246125  | -0.294000 | -4.088110 |
| C | 1.262102  | -6.961042 | -1.445976 | C | 4.975579  | 2.546134  | -1.717446 |
| H | 1.870135  | -7.608481 | -0.803521 | C | 6.566094  | 1.777302  | -3.510661 |
| H | 0.244033  | -6.964001 | -1.034084 | H | 5.854027  | 2.117316  | -4.276083 |
| H | 1.215005  | -7.418258 | -2.440062 | H | 7.569179  | 1.886809  | -3.940319 |
| C | 3.390190  | -3.034890 | 0.883599  | C | 6.407775  | 2.640797  | -2.256344 |
| H | 4.387947  | -2.618349 | 0.698010  | H | 4.304260  | 3.071730  | -2.415136 |
| H | 2.766143  | -2.229319 | 1.281027  | H | 4.887585  | 3.089268  | -0.774427 |
| H | 3.476642  | -3.793795 | 1.665088  | H | 7.118497  | 2.301607  | -1.488639 |
| C | -0.307791 | 4.083501  | 0.487496  | H | 6.650063  | 3.688953  | -2.469976 |
| C | -1.306073 | 4.137182  | 1.485367  | C | 2.932155  | -4.228315 | 4.896034  |
| C | -0.515856 | 4.756551  | -0.740746 | C | 2.220352  | -5.302300 | 4.357051  |
| C | -2.499369 | 4.823699  | 1.223343  | C | 1.116712  | -5.068415 | 3.539178  |
| C | -1.718481 | 5.437111  | -0.952843 | C | 0.684043  | -3.762225 | 3.224538  |
| C | -2.730829 | 5.476403  | 0.011586  | C | 1.418314  | -2.694139 | 3.780763  |
| H | -3.264557 | 4.853081  | 1.997208  | C | 2.520943  | -2.926223 | 4.601540  |
| H | -1.863349 | 5.961728  | -1.895592 | H | 3.790837  | -4.403111 | 5.538860  |
| C | 0.543823  | 4.786283  | -1.819857 | H | 2.521311  | -6.323608 | 4.577512  |
| H | 1.522545  | 5.069805  | -1.416278 | H | 0.565834  | -5.913170 | 3.131079  |
| H | 0.661688  | 3.804078  | -2.291011 | H | 1.129823  | -1.673634 | 3.568806  |
| H | 0.278680  | 5.504702  | -2.601952 | H | 3.063519  | -2.079424 | 5.015160  |
| C | -1.126224 | 3.502182  | 2.847832  | C | -0.500158 | -3.633534 | 2.361076  |
| H | -0.459064 | 2.638769  | 2.815457  | H | -0.926009 | -4.604532 | 2.103360  |
| H | -0.698310 | 4.214731  | 3.566031  | C | -1.162185 | -2.567116 | 1.854896  |

|    |           |           |           |                                           |           |           |           |
|----|-----------|-----------|-----------|-------------------------------------------|-----------|-----------|-----------|
| H  | -2.043179 | -2.842006 | 1.276756  | C                                         | -3.262136 | 2.065552  | -2.954508 |
| C  | -0.891235 | -1.089294 | 1.965657  | H                                         | -2.453319 | 1.633903  | -3.553690 |
| H  | 0.186613  | -0.922197 | 1.855000  | H                                         | -4.206045 | 1.592371  | -3.238509 |
| C  | -1.309116 | -0.490998 | 3.324330  | H                                         | -3.327372 | 3.135736  | -3.186227 |
| H  | -0.731125 | -0.938134 | 4.145920  |                                           |           |           |           |
| H  | -1.131329 | 0.589374  | 3.348476  | <b>IM11a</b>                              |           |           |           |
| H  | -2.362672 | -0.659922 | 3.547820  | SCF energy in Ethanol: -2889.879409 a.u.  |           |           |           |
| Ni | -1.759882 | -0.216842 | 0.428422  | Free energy in Ethanol: -2888.938979 a.u. |           |           |           |
| B  | -3.983669 | -0.311290 | -0.753037 | P                                         | 0.249405  | 0.502026  | -1.176121 |
| O  | -3.966220 | -1.684239 | -1.092090 | N                                         | -0.077281 | 1.073277  | -2.715276 |
| O  | -5.242594 | 0.248455  | -1.035529 | C                                         | 0.602336  | 2.265549  | -3.217934 |
| C  | -5.164080 | -1.981289 | -1.840207 | H                                         | 1.099294  | 2.037975  | -4.170738 |
| C  | -6.147393 | -0.799505 | -1.437963 | H                                         | -0.108327 | 3.086861  | -3.381130 |
| C  | -5.647700 | -3.378572 | -1.445457 | H                                         | 1.362576  | 2.597789  | -2.506944 |
| H  | -5.821764 | -3.454388 | -0.369835 | C                                         | -0.964911 | 0.439725  | -3.690764 |
| H  | -6.575919 | -3.638614 | -1.968053 | H                                         | -1.526754 | -0.371194 | -3.231043 |
| H  | -4.887531 | -4.118805 | -1.717748 | H                                         | -1.667823 | 1.177693  | -4.094449 |
| C  | -4.786680 | -1.977735 | -3.331481 | H                                         | -0.377777 | 0.029774  | -4.524437 |
| H  | -5.636051 | -2.241986 | -3.971321 | O                                         | 0.007374  | -1.107513 | -1.546090 |
| H  | -4.407586 | -1.000232 | -3.644436 | O                                         | -1.033292 | 0.747548  | -0.123253 |
| H  | -3.993117 | -2.714367 | -3.495170 | C                                         | -0.246404 | -2.025220 | -0.529713 |
| C  | -7.002668 | -0.262406 | -2.590924 | C                                         | -1.513060 | -2.024351 | 0.067090  |
| H  | -7.607932 | 0.576844  | -2.232232 | C                                         | 0.761328  | -2.938912 | -0.182001 |
| H  | -6.390862 | 0.097082  | -3.421735 | C                                         | -1.750324 | -2.885485 | 1.171130  |
| H  | -7.685214 | -1.032727 | -2.969243 | C                                         | -2.568622 | -1.082922 | -0.431565 |
| C  | -7.069727 | -1.129278 | -0.254246 | C                                         | 0.457341  | -3.839234 | 0.839884  |
| H  | -7.821532 | -1.878106 | -0.527995 | C                                         | -0.755549 | -3.810206 | 1.539193  |
| H  | -6.509499 | -1.491357 | 0.609152  | C                                         | -2.321981 | 0.300362  | -0.404401 |
| H  | -7.590749 | -0.215017 | 0.048492  | C                                         | -3.822467 | -1.542460 | -0.906967 |
| C  | -3.646581 | -0.247613 | 1.266090  | H                                         | 1.208715  | -4.572721 | 1.123615  |
| C  | -3.927333 | 1.028039  | 1.809214  | C                                         | -3.333217 | 1.252564  | -0.622106 |
| C  | -4.254642 | -1.344143 | 1.915960  | C                                         | -4.843391 | -0.607936 | -1.160661 |
| C  | -4.742992 | 1.201405  | 2.930658  | C                                         | -4.592497 | 0.755267  | -0.969311 |
| H  | -3.501975 | 1.915303  | 1.345166  | C                                         | -3.100224 | 2.721994  | -0.455743 |
| C  | -5.074941 | -1.189551 | 3.032699  | C                                         | -3.224542 | 3.606444  | -1.547926 |
| H  | -4.098781 | -2.342774 | 1.516966  | C                                         | -2.797217 | 3.240870  | 0.828033  |
| C  | -5.316585 | 0.089030  | 3.548262  | C                                         | -2.992413 | 4.975195  | -1.352296 |
| H  | -4.935253 | 2.199235  | 3.319709  | C                                         | -2.586896 | 4.613119  | 0.976520  |
| H  | -5.528465 | -2.059273 | 3.503390  | C                                         | -2.663658 | 5.500004  | -0.103421 |
| H  | -5.954420 | 0.214655  | 4.420117  | H                                         | -3.077933 | 5.646608  | -2.205111 |
| O  | -2.832652 | 0.483387  | -1.139797 | H                                         | -2.360926 | 5.001694  | 1.967801  |
| C  | -2.993949 | 1.882253  | -1.467839 | C                                         | -3.632333 | 3.146801  | -2.932390 |
| H  | -2.067424 | 2.380369  | -1.178869 | H                                         | -4.714410 | 3.259547  | -3.085481 |
| H  | -3.813379 | 2.302808  | -0.879402 | H                                         | -3.139612 | 3.749610  | -3.703655 |

|   |           |           |           |              |           |           |           |
|---|-----------|-----------|-----------|--------------|-----------|-----------|-----------|
| H | -3.395367 | 2.096227  | -3.108813 | H            | -6.654275 | -0.298594 | -2.283909 |
| C | -2.393399 | 6.974739  | 0.084738  | C            | -4.028292 | -3.008634 | -1.268719 |
| H | -2.910423 | 7.367642  | 0.968154  | C            | -6.292829 | -2.440403 | -2.203543 |
| H | -1.322006 | 7.167335  | 0.228126  | H            | -5.860988 | -2.419765 | -3.214199 |
| H | -2.719485 | 7.556385  | -0.783750 | H            | -7.336131 | -2.760663 | -2.311453 |
| C | -2.729019 | 2.353375  | 2.050831  | C            | -5.501631 | -3.425978 | -1.339121 |
| H | -3.578432 | 1.662140  | 2.094805  | H            | -3.574551 | -3.167069 | -2.260105 |
| H | -1.816610 | 1.747553  | 2.064389  | H            | -3.473763 | -3.665100 | -0.595615 |
| H | -2.736018 | 2.955991  | 2.964297  | H            | -5.932110 | -3.451819 | -0.327380 |
| C | 2.095183  | -2.941706 | -0.860119 | H            | -5.575771 | -4.444005 | -1.740373 |
| C | 3.248800  | -2.534927 | -0.150629 | Ni           | 2.252336  | 1.230041  | -0.353938 |
| C | 2.208544  | -3.351117 | -2.205947 | C            | -0.229606 | -0.288126 | 5.301073  |
| C | 4.479720  | -2.508047 | -0.813856 | C            | 0.595707  | 0.584540  | 6.015116  |
| C | 3.463591  | -3.320781 | -2.824086 | C            | 1.494482  | 1.405496  | 5.339192  |
| C | 4.609634  | -2.889372 | -2.152324 | C            | 1.591099  | 1.395231  | 3.931848  |
| H | 5.356205  | -2.158478 | -0.272923 | C            | 0.762861  | 0.494997  | 3.231649  |
| H | 3.544028  | -3.639565 | -3.861774 | C            | -0.134010 | -0.331280 | 3.908481  |
| C | 1.007929  | -3.830632 | -2.991301 | H            | -0.930362 | -0.933390 | 5.824855  |
| H | 0.427611  | -4.573333 | -2.431760 | H            | 0.541107  | 0.623073  | 7.100305  |
| H | 0.328894  | -3.003214 | -3.228666 | H            | 2.134734  | 2.080202  | 5.903474  |
| H | 1.320705  | -4.288024 | -3.935545 | H            | 0.837585  | 0.420439  | 2.153511  |
| C | 3.194452  | -2.130150 | 1.306871  | H            | -0.750687 | -1.020498 | 3.338060  |
| H | 2.343645  | -1.478076 | 1.525441  | C            | 2.561545  | 2.294138  | 3.297770  |
| H | 3.102568  | -3.002871 | 1.966463  | H            | 3.338900  | 2.640068  | 3.979809  |
| H | 4.105094  | -1.594716 | 1.588555  | C            | 2.625788  | 2.790782  | 2.036894  |
| C | 5.953701  | -2.831300 | -2.840652 | H            | 3.478794  | 3.441437  | 1.841953  |
| H | 6.671378  | -3.522212 | -2.379581 | C            | 1.712446  | 2.648471  | 0.891112  |
| H | 5.873111  | -3.094089 | -3.900556 | H            | 0.725992  | 2.283988  | 1.196076  |
| H | 6.385156  | -1.825324 | -2.771901 | C            | 1.570811  | 3.960771  | 0.109779  |
| C | -0.929823 | -4.765922 | 2.710683  | H            | 2.534325  | 4.297847  | -0.288841 |
| C | -2.371184 | -4.859281 | 3.219692  | H            | 1.185041  | 4.754937  | 0.767750  |
| C | -2.958399 | -3.452692 | 3.353132  | H            | 0.864664  | 3.872746  | -0.721563 |
| C | -3.041401 | -2.779123 | 1.976728  | C            | 4.104033  | 1.519752  | -0.345678 |
| H | -3.957731 | -3.481709 | 3.803758  | C            | 5.031193  | 1.200995  | 0.664682  |
| H | -2.982248 | -5.443477 | 2.516669  | C            | 4.617922  | 1.748736  | -1.640974 |
| H | -2.395084 | -5.391242 | 4.178210  | C            | 6.394986  | 1.072148  | 0.390727  |
| H | -0.283877 | -4.428190 | 3.535146  | H            | 4.680791  | 1.053770  | 1.684219  |
| H | -0.555841 | -5.758001 | 2.426248  | C            | 5.984912  | 1.624393  | -1.922674 |
| H | -3.872113 | -3.238574 | 1.424364  | H            | 3.949379  | 2.027802  | -2.455835 |
| H | -3.312076 | -1.722725 | 2.086636  | C            | 6.877003  | 1.281519  | -0.905993 |
| H | -2.325002 | -2.858351 | 4.026832  | H            | 7.086558  | 0.812974  | 1.190354  |
| H | -5.402429 | 1.464699  | -1.124370 | H            | 6.350128  | 1.807602  | -2.931419 |
| C | -6.240042 | -1.038108 | -1.587186 | H            | 7.940341  | 1.193338  | -1.116338 |
| H | -6.896597 | -1.015541 | -0.703551 | <b>IM11b</b> |           |           |           |

|                                           |           |           |           |          |           |           |           |
|-------------------------------------------|-----------|-----------|-----------|----------|-----------|-----------|-----------|
| SCF energy in Ethanol: -2889.862564 a.u.  |           |           | H         | 3.862611 | -1.654052 | 1.366554  |           |
| Free energy in Ethanol: -2888.923867 a.u. |           |           | H         | 2.130086 | -1.861435 | 1.642632  |           |
| P                                         | -0.433019 | -0.198307 | -0.873875 | H        | 3.253391  | -3.109779 | 2.176137  |
| N                                         | -0.390536 | -0.596268 | -2.505370 | C        | -2.162595 | 3.306333  | 0.138327  |
| C                                         | -0.780065 | -1.950666 | -2.907564 | C        | -3.208244 | 2.960046  | 1.022621  |
| H                                         | -1.512504 | -1.903428 | -3.722919 | C        | -2.470695 | 3.864943  | -1.122696 |
| H                                         | 0.092552  | -2.528375 | -3.238488 | C        | -4.535016 | 3.151088  | 0.618287  |
| H                                         | -1.241131 | -2.481697 | -2.068452 | C        | -3.810168 | 4.042526  | -1.481628 |
| C                                         | 0.144038  | 0.217693  | -3.595587 | C        | -4.860096 | 3.683475  | -0.631868 |
| H                                         | 0.479151  | 1.182676  | -3.220696 | H        | -5.335201 | 2.878303  | 1.303732  |
| H                                         | 0.986230  | -0.289451 | -4.082339 | H        | -4.038256 | 4.480505  | -2.451668 |
| H                                         | -0.639006 | 0.383099  | -4.347918 | C        | -1.385713 | 4.302217  | -2.081188 |
| O                                         | -0.291106 | 1.454382  | -1.090669 | H        | -0.630087 | 4.919851  | -1.582221 |
| O                                         | 1.027017  | -0.535629 | -0.117913 | H        | -0.864282 | 3.439907  | -2.511590 |
| C                                         | 0.159541  | 2.259407  | -0.046028 | H        | -1.808822 | 4.884906  | -2.905606 |
| C                                         | 1.512429  | 2.191511  | 0.312852  | C        | -2.937548 | 2.398685  | 2.402964  |
| C                                         | -0.738066 | 3.149097  | 0.567734  | H        | -2.201848 | 1.587963  | 2.377128  |
| C                                         | 1.959742  | 2.899122  | 1.457599  | H        | -2.545255 | 3.161506  | 3.086165  |
| C                                         | 2.457287  | 1.356602  | -0.496253 | H        | -3.857585 | 2.006389  | 2.845468  |
| C                                         | -0.230128 | 3.920508  | 1.615986  | C        | -6.299740 | 3.849951  | -1.059719 |
| C                                         | 1.075407  | 3.783372  | 2.099610  | H        | -6.964527 | 3.964741  | -0.196903 |
| C                                         | 2.228252  | -0.023267 | -0.606084 | H        | -6.427919 | 4.725236  | -1.706207 |
| C                                         | 3.587067  | 1.921819  | -1.138094 | H        | -6.648508 | 2.975587  | -1.625698 |
| H                                         | -0.891978 | 4.639357  | 2.093596  | C        | 1.475836  | 4.581002  | 3.331771  |
| C                                         | 3.174249  | -0.901330 | -1.165957 | C        | 2.983212  | 4.576882  | 3.604298  |
| C                                         | 4.538285  | 1.066464  | -1.722795 | C        | 3.528510  | 3.154537  | 3.455969  |
| C                                         | 4.332684  | -0.316554 | -1.686256 | C        | 3.362674  | 2.671556  | 2.008955  |
| C                                         | 2.994437  | -2.386303 | -1.179729 | H        | 4.587502  | 3.106508  | 3.736675  |
| C                                         | 2.953202  | -3.102468 | -2.396691 | H        | 3.496319  | 5.238435  | 2.891642  |
| C                                         | 2.922887  | -3.093009 | 0.045695  | H        | 3.182387  | 4.975444  | 4.606223  |
| C                                         | 2.781231  | -4.492905 | -2.367477 | H        | 0.957177  | 4.158444  | 4.205769  |
| C                                         | 2.762907  | -4.480639 | 0.024070  | H        | 1.104104  | 5.609396  | 3.234454  |
| C                                         | 2.673107  | -5.201561 | -1.170851 | H        | 4.104674  | 3.191199  | 1.387393  |
| H                                         | 2.738119  | -5.034082 | -3.311266 | H        | 3.610688  | 1.606830  | 1.933245  |
| H                                         | 2.709660  | -5.012210 | 0.971956  | H        | 2.988663  | 2.484033  | 4.139431  |
| C                                         | 3.123701  | -2.437836 | -3.747950 | H        | 5.096350  | -0.969662 | -2.102442 |
| H                                         | 4.177103  | -2.433419 | -4.059573 | C        | 5.817839  | 1.596686  | -2.354125 |
| H                                         | 2.567455  | -2.979816 | -4.520738 | H        | 6.640646  | 1.472991  | -1.632978 |
| H                                         | 2.791490  | -1.397699 | -3.747328 | H        | 6.084578  | 0.975599  | -3.218466 |
| C                                         | 2.457770  | -6.697314 | -1.161862 | C        | 3.713347  | 3.430799  | -1.309564 |
| H                                         | 3.032198  | -7.180346 | -0.363095 | C        | 5.737970  | 3.072003  | -2.761120 |
| H                                         | 1.401259  | -6.946637 | -0.994389 | H        | 5.107063  | 3.178664  | -3.654967 |
| H                                         | 2.753733  | -7.151448 | -2.113485 | H        | 6.735546  | 3.438380  | -3.032010 |
| C                                         | 3.051379  | -2.390889 | 1.378186  | C        | 5.139435  | 3.899994  | -1.620732 |



|                                           |           |           |           |   |           |           |           |
|-------------------------------------------|-----------|-----------|-----------|---|-----------|-----------|-----------|
| H                                         | 3.059590  | 3.721216  | -2.147408 | H | -0.033910 | -2.567202 | -3.303510 |
| H                                         | 3.317044  | 3.962744  | -0.442530 | H | 1.691396  | -2.187625 | -3.003222 |
| H                                         | 5.770057  | 3.797017  | -0.725576 | H | 0.678381  | -2.846968 | -1.707894 |
| H                                         | 5.126531  | 4.966319  | -1.877100 | C | 0.206171  | 0.124203  | -3.273996 |
| C                                         | 1.646604  | -3.006741 | 5.075454  | H | 0.087985  | 1.140753  | -2.903999 |
| C                                         | 1.558237  | -4.223471 | 4.395247  | H | 1.107426  | 0.080517  | -3.897345 |
| C                                         | 0.529066  | -4.440889 | 3.481985  | H | -0.661273 | -0.130296 | -3.900086 |
| C                                         | -0.445752 | -3.456811 | 3.211819  | O | -0.979649 | 0.869934  | -0.848933 |
| C                                         | -0.348654 | -2.244047 | 3.926081  | O | 1.209053  | 0.045210  | 0.259514  |
| C                                         | 0.684163  | -2.022913 | 4.835578  | C | -1.086008 | 1.870347  | 0.112802  |
| H                                         | 2.444653  | -2.832863 | 5.792253  | C | 0.066931  | 2.577895  | 0.484248  |
| H                                         | 2.287918  | -5.007749 | 4.582080  | C | -2.355489 | 2.199736  | 0.625353  |
| H                                         | 0.465420  | -5.394900 | 2.963254  | C | 0.005017  | 3.484301  | 1.573263  |
| H                                         | -1.107045 | -1.481013 | 3.798340  | C | 1.349972  | 2.374990  | -0.261740 |
| H                                         | 0.726627  | -1.079204 | 5.373975  | C | -2.393376 | 3.185836  | 1.615110  |
| C                                         | -1.527954 | -3.806369 | 2.281072  | C | -1.244996 | 3.790233  | 2.136571  |
| H                                         | -1.579839 | -4.878555 | 2.087671  | C | 1.942034  | 1.103946  | -0.268926 |
| C                                         | -2.486437 | -3.065968 | 1.668825  | C | 1.985635  | 3.442103  | -0.943627 |
| H                                         | -3.234022 | -3.648681 | 1.130376  | H | -3.362987 | 3.474988  | 2.013808  |
| C                                         | -2.733881 | -1.608204 | 1.620381  | C | 3.239784  | 0.884595  | -0.765307 |
| H                                         | -1.910805 | -1.020903 | 2.046090  | C | 3.274475  | 3.240899  | -1.469185 |
| C                                         | -4.069162 | -1.205426 | 2.253784  | C | 3.883813  | 1.989848  | -1.330259 |
| H                                         | -4.012373 | -1.297829 | 3.350094  | C | 3.942676  | -0.432592 | -0.677148 |
| H                                         | -4.339497 | -0.172872 | 2.015689  | C | 4.351141  | -1.114485 | -1.843521 |
| H                                         | -4.883308 | -1.848828 | 1.908463  | C | 4.265228  | -0.971975 | 0.592136  |
| Ni                                        | -2.473370 | -1.104168 | -0.231238 | C | 5.017229  | -2.341761 | -1.721176 |
| C                                         | -4.176372 | -1.601393 | -0.788985 | C | 4.940743  | -2.190983 | 0.664628  |
| C                                         | -5.138188 | -0.594037 | -1.010935 | C | 5.314397  | -2.902957 | -0.480293 |
| C                                         | -4.458633 | -2.889576 | -1.283849 | H | 5.312400  | -2.868369 | -2.627141 |
| C                                         | -6.315052 | -0.858518 | -1.719209 | H | 5.175576  | -2.599920 | 1.644694  |
| H                                         | -4.972443 | 0.410460  | -0.625448 | C | 4.126718  | -0.561761 | -3.236047 |
| C                                         | -5.634867 | -3.157486 | -1.991953 | H | 4.960039  | 0.080560  | -3.551554 |
| H                                         | -3.752918 | -3.702854 | -1.119140 | H | 4.057822  | -1.373758 | -3.968167 |
| C                                         | -6.567340 | -2.141156 | -2.212279 | H | 3.219517  | 0.042251  | -3.302555 |
| H                                         | -7.039947 | -0.062581 | -1.880593 | C | 6.020178  | -4.233912 | -0.364700 |
| H                                         | -5.824513 | -4.160936 | -2.368348 | H | 6.949642  | -4.147142 | 0.212120  |
| H                                         | -7.485600 | -2.348649 | -2.756606 | H | 5.391267  | -4.971100 | 0.150339  |
|                                           |           |           |           | H | 6.274575  | -4.640086 | -1.349113 |
|                                           |           |           |           | C | 3.924770  | -0.241416 | 1.871506  |
| <b>IM12a</b>                              |           |           |           | H | 4.229590  | 0.810793  | 1.826672  |
| SCF energy in Ethanol: -2889.909515 a.u.  |           |           |           | H | 2.847850  | -0.264180 | 2.067368  |
| Free energy in Ethanol: -2888.964811 a.u. |           |           |           | H | 4.428661  | -0.705435 | 2.724626  |
| P                                         | -0.125703 | -0.547938 | -0.578503 | C | -3.633135 | 1.592877  | 0.137770  |
| N                                         | 0.324814  | -0.819925 | -2.165703 | C | -4.458580 | 0.859327  | 1.019132  |
| C                                         | 0.683544  | -2.178575 | -2.570784 |   |           |           |           |

|    |           |           |           |                                           |           |           |           |
|----|-----------|-----------|-----------|-------------------------------------------|-----------|-----------|-----------|
| C  | -4.068954 | 1.825787  | -1.188168 | C                                         | 2.980474  | -4.784508 | 2.826710  |
| C  | -5.666409 | 0.331647  | 0.547285  | C                                         | 2.835403  | -3.680229 | 3.670602  |
| C  | -5.290396 | 1.292466  | -1.610037 | C                                         | 1.773655  | -2.795850 | 3.492203  |
| C  | -6.098345 | 0.525667  | -0.765527 | C                                         | 0.812949  | -2.990987 | 2.479988  |
| H  | -6.287041 | -0.246125 | 1.229876  | C                                         | 0.991057  | -4.096590 | 1.625529  |
| H  | -5.620096 | 1.484138  | -2.629560 | C                                         | 2.058178  | -4.979667 | 1.798283  |
| C  | -3.259632 | 2.657953  | -2.157589 | H                                         | 3.803306  | -5.480380 | 2.967534  |
| H  | -2.905047 | 3.586920  | -1.697093 | H                                         | 3.547506  | -3.509965 | 4.474471  |
| H  | -2.376640 | 2.111685  | -2.507307 | H                                         | 1.665946  | -1.945548 | 4.161577  |
| H  | -3.859731 | 2.921952  | -3.034167 | H                                         | 0.306083  | -4.259206 | 0.800058  |
| C  | -4.101103 | 0.643598  | 2.474936  | H                                         | 2.165873  | -5.824370 | 1.122411  |
| H  | -4.447879 | 1.475474  | 3.102513  | C                                         | -0.326731 | -2.036284 | 2.413853  |
| H  | -4.577290 | -0.265075 | 2.857980  | H                                         | -0.095362 | -1.072486 | 2.864048  |
| H  | -3.022105 | 0.561200  | 2.628478  | C                                         | -1.702426 | -2.368953 | 2.422774  |
| C  | -7.382990 | -0.092119 | -1.265292 | H                                         | -2.383210 | -1.590941 | 2.767246  |
| H  | -8.109702 | -0.220639 | -0.455781 | C                                         | -2.266682 | -3.433112 | 1.694267  |
| H  | -7.847350 | 0.521656  | -2.045046 | H                                         | -1.665104 | -4.328202 | 1.537114  |
| H  | -7.197077 | -1.084344 | -1.697646 | C                                         | -3.757802 | -3.657443 | 1.638393  |
| C  | -1.396560 | 4.742546  | 3.313279  | H                                         | -4.307056 | -2.712680 | 1.711089  |
| C  | -0.138674 | 5.568315  | 3.602567  | H                                         | -4.089141 | -4.309035 | 2.460134  |
| C  | 1.093130  | 4.660567  | 3.559360  | H                                         | -4.042816 | -4.136501 | 0.697151  |
| C  | 1.280891  | 4.088053  | 2.148243  | C                                         | -2.212950 | -2.716798 | -1.061582 |
| H  | 1.996720  | 5.207511  | 3.854358  | C                                         | -2.078011 | -4.035807 | -1.542320 |
| H  | -0.029348 | 6.363570  | 2.851286  | C                                         | -3.101752 | -1.882499 | -1.767236 |
| H  | -0.232934 | 6.063375  | 4.576481  | C                                         | -2.772488 | -4.493534 | -2.667340 |
| H  | -1.646014 | 4.153913  | 4.209404  | H                                         | -1.417141 | -4.736942 | -1.031189 |
| H  | -2.258790 | 5.399649  | 3.140120  | C                                         | -3.805675 | -2.332678 | -2.890425 |
| H  | 1.648011  | 4.893164  | 1.496980  | H                                         | -3.253167 | -0.856188 | -1.444106 |
| H  | 2.071027  | 3.328724  | 2.148499  | C                                         | -3.642759 | -3.640849 | -3.350201 |
| H  | 0.967318  | 3.842199  | 4.282449  | H                                         | -2.636417 | -5.519265 | -3.006241 |
| H  | 4.897685  | 1.858134  | -1.701220 | H                                         | -4.481980 | -1.653095 | -3.406426 |
| C  | 4.052028  | 4.360542  | -2.146255 | H                                         | -4.187659 | -3.992584 | -4.223281 |
| H  | 4.772434  | 4.774462  | -1.423502 |                                           |           |           |           |
| H  | 4.655700  | 3.944972  | -2.962761 |                                           |           |           |           |
| C  | 1.245253  | 4.745955  | -1.218066 | <b>IM12b</b>                              |           |           |           |
| C  | 3.165440  | 5.498162  | -2.663321 | SCF energy in Ethanol: -2889.910700 a.u.  |           |           |           |
| H  | 2.615189  | 5.166139  | -3.555168 | Free energy in Ethanol: -2888.965247 a.u. |           |           |           |
| H  | 3.788631  | 6.345915  | -2.972851 | P                                         | -0.088097 | -0.917870 | -0.576866 |
| C  | 2.166085  | 5.916907  | -1.581590 | N                                         | 0.457515  | -1.588130 | -2.009723 |
| H  | 0.561330  | 4.563479  | -2.062141 | C                                         | 0.500808  | -3.043798 | -2.135802 |
| H  | 0.597872  | 5.017466  | -0.381825 | H                                         | -0.215474 | -3.389380 | -2.890569 |
| H  | 2.714937  | 6.251266  | -0.688946 | H                                         | 1.511000  | -3.367429 | -2.413344 |
| H  | 1.560635  | 6.767998  | -1.916478 | H                                         | 0.241438  | -3.516225 | -1.185739 |
| Ni | -1.230569 | -2.103488 | 0.484802  | C                                         | 0.730466  | -0.874258 | -3.254596 |
|    |           |           |           | H                                         | 0.781324  | 0.198482  | -3.080732 |

|   |           |           |           |    |           |           |           |
|---|-----------|-----------|-----------|----|-----------|-----------|-----------|
| H | 1.687488  | -1.208098 | -3.674821 | H  | -4.602462 | 2.319668  | -3.672197 |
| H | -0.060855 | -1.076777 | -3.990268 | C  | -2.024391 | 2.755169  | -3.074114 |
| O | -0.483029 | 0.589082  | -1.185370 | H  | -1.442439 | 3.606973  | -2.704141 |
| O | 1.263399  | -0.531821 | 0.362533  | H  | -1.324205 | 1.925442  | -3.225672 |
| C | -0.370940 | 1.761727  | -0.440373 | H  | -2.438191 | 3.025599  | -4.050739 |
| C | 0.902965  | 2.203586  | -0.050412 | C  | -3.758561 | 1.692827  | 1.619306  |
| C | -1.529830 | 2.514063  | -0.173568 | H  | -2.873547 | 1.092823  | 1.849192  |
| C | 1.014913  | 3.310286  | 0.831745  | H  | -3.630282 | 2.650883  | 2.137809  |
| C | 2.136756  | 1.505548  | -0.536788 | H  | -4.627820 | 1.196614  | 2.061991  |
| C | -1.366077 | 3.659501  | 0.608874  | C  | -6.877497 | 1.613331  | -2.331896 |
| C | -0.138498 | 4.043161  | 1.157034  | H  | -7.070631 | 0.542255  | -2.479439 |
| C | 2.329450  | 0.157700  | -0.202550 | H  | -7.651755 | 1.989786  | -1.653756 |
| C | 3.133197  | 2.181880  | -1.282859 | H  | -7.006887 | 2.106240  | -3.301400 |
| H | -2.244075 | 4.267702  | 0.813919  | C  | -0.109187 | 5.234095  | 2.102906  |
| C | 3.558708  | -0.497463 | -0.398398 | C  | 1.301739  | 5.756882  | 2.389897  |
| C | 4.363046  | 1.539397  | -1.514791 | C  | 2.236218  | 4.580721  | 2.682155  |
| C | 4.562809  | 0.242382  | -1.030473 | C  | 2.361055  | 3.679799  | 1.445990  |
| C | 3.818845  | -1.898343 | 0.059469  | H  | 3.232073  | 4.931962  | 2.978242  |
| C | 4.139132  | -2.912406 | -0.870094 | H  | 1.680539  | 6.313621  | 1.520809  |
| C | 3.805346  | -2.205425 | 1.441732  | H  | 1.276116  | 6.460935  | 3.230229  |
| C | 4.381199  | -4.213390 | -0.410043 | H  | -0.577179 | 4.936210  | 3.053718  |
| C | 4.062433  | -3.515435 | 1.854548  | H  | -0.742799 | 6.034247  | 1.698731  |
| C | 4.338160  | -4.541592 | 0.945071  | H  | 2.985402  | 4.200045  | 0.706918  |
| H | 4.614606  | -4.989484 | -1.136924 | H  | 2.908565  | 2.764719  | 1.698438  |
| H | 4.058231  | -3.737661 | 2.920175  | H  | 1.840761  | 4.003209  | 3.530203  |
| C | 4.262061  | -2.645202 | -2.355943 | H  | 5.533706  | -0.225927 | -1.175546 |
| H | 5.272695  | -2.306945 | -2.620834 | C  | 5.511342  | 2.233608  | -2.233593 |
| H | 4.071589  | -3.558035 | -2.930465 | H  | 6.229390  | 2.593021  | -1.480141 |
| H | 3.570311  | -1.870929 | -2.695097 | H  | 6.059194  | 1.502042  | -2.840744 |
| C | 4.574178  | -5.957400 | 1.417681  | C  | 2.845037  | 3.532513  | -1.927240 |
| H | 5.147280  | -5.978376 | 2.351624  | C  | 5.069738  | 3.419969  | -3.097515 |
| H | 3.625835  | -6.476900 | 1.610585  | H  | 4.565572  | 3.054601  | -4.003371 |
| H | 5.121177  | -6.543390 | 0.671585  | H  | 5.948427  | 3.985412  | -3.430676 |
| C | 3.562542  | -1.143109 | 2.490605  | C  | 4.106701  | 4.314189  | -2.311792 |
| H | 4.162761  | -0.245796 | 2.301331  | H  | 2.260960  | 3.341732  | -2.841587 |
| H | 2.513385  | -0.830452 | 2.513271  | H  | 2.193977  | 4.140593  | -1.295771 |
| H | 3.820456  | -1.518006 | 3.486107  | H  | 4.608720  | 4.683340  | -1.405445 |
| C | -2.885836 | 2.209959  | -0.731396 | H  | 3.826293  | 5.197093  | -2.899019 |
| C | -3.955028 | 1.873753  | 0.130174  | H  | -2.909423 | -5.265121 | 1.186214  |
| C | -3.127479 | 2.370165  | -2.113928 | Ni | -1.536376 | -2.111276 | 0.537580  |
| C | -5.233217 | 1.694967  | -0.409366 | C  | -0.688618 | -2.068690 | 2.488433  |
| C | -4.423916 | 2.185600  | -2.606893 | C  | -1.451038 | -3.231286 | 2.221731  |
| C | -5.492068 | 1.843698  | -1.774230 | H  | -0.907832 | -4.163664 | 2.053086  |
| H | -6.049052 | 1.426531  | 0.259234  | C  | -2.794318 | -3.192604 | 1.800481  |

|                                           |           |           |           |   |           |           |           |
|-------------------------------------------|-----------|-----------|-----------|---|-----------|-----------|-----------|
| H                                         | -3.403575 | -2.334477 | 2.084322  | C | -0.995035 | -2.447520 | 0.414361  |
| C                                         | -3.571636 | -4.443339 | 1.481467  | C | 1.418408  | -2.893139 | 0.525168  |
| H                                         | -4.282011 | -4.276219 | 0.667334  | C | -1.220757 | -3.327023 | 1.504956  |
| H                                         | -4.140768 | -4.776792 | 2.361452  | C | -2.151936 | -1.792976 | -0.277797 |
| C                                         | -2.649111 | -2.465089 | -1.011613 | C | 1.140538  | -3.846211 | 1.508312  |
| C                                         | -3.435578 | -1.476809 | -1.634021 | C | -0.137515 | -4.044662 | 2.039343  |
| C                                         | -2.703598 | -3.754403 | -1.580866 | C | -2.252096 | -0.392204 | -0.262773 |
| C                                         | -4.228847 | -1.757922 | -2.753537 | C | -3.168056 | -2.554342 | -0.906232 |
| H                                         | -3.434535 | -0.461554 | -1.250421 | H | 1.965438  | -4.438129 | 1.898287  |
| C                                         | -3.486790 | -4.044612 | -2.702921 | C | -3.423575 | 0.277928  | -0.666382 |
| H                                         | -2.126841 | -4.566690 | -1.139204 | C | -4.338391 | -1.904427 | -1.336428 |
| C                                         | -4.257213 | -3.042771 | -3.297164 | C | -4.457147 | -0.521734 | -1.164469 |
| H                                         | -4.816654 | -0.960481 | -3.203415 | C | -3.601665 | 1.759618  | -0.556579 |
| H                                         | -3.497849 | -5.055101 | -3.108545 | C | -3.882352 | 2.539304  | -1.701391 |
| H                                         | -4.870496 | -3.261801 | -4.168396 | C | -3.554631 | 2.388188  | 0.713469  |
| C                                         | -1.146680 | -0.900353 | 3.288093  | C | -4.052124 | 3.923961  | -1.564600 |
| C                                         | -0.408277 | 0.299204  | 3.269710  | C | -3.741124 | 3.769252  | 0.800406  |
| C                                         | -2.246552 | -0.972646 | 4.165241  | C | -3.977710 | 4.561736  | -0.327472 |
| C                                         | -0.756899 | 1.375729  | 4.083515  | H | -4.252107 | 4.515840  | -2.456278 |
| H                                         | 0.442133  | 0.383605  | 2.600885  | H | -3.695165 | 4.239141  | 1.780538  |
| C                                         | -2.598728 | 0.107014  | 4.974589  | C | -4.038816 | 1.946293  | -3.087373 |
| H                                         | -2.809274 | -1.897537 | 4.240297  | H | -5.085770 | 1.686723  | -3.295546 |
| C                                         | -1.857182 | 1.289751  | 4.939621  | H | -3.732599 | 2.667533  | -3.853038 |
| H                                         | -0.165808 | 2.287169  | 4.044865  | H | -3.454894 | 1.033617  | -3.220039 |
| H                                         | -3.448076 | 0.015910  | 5.647402  | C | -4.149146 | 6.057786  | -0.200046 |
| H                                         | -2.128072 | 2.128120  | 5.575931  | H | -4.940249 | 6.311995  | 0.516399  |
| H                                         | 0.390369  | -2.207712 | 2.496261  | H | -3.228016 | 6.535030  | 0.158774  |
|                                           |           |           |           | H | -4.407968 | 6.514984  | -1.160710 |
|                                           |           |           |           | C | -3.339527 | 1.603335  | 1.987820  |
| <b>TS9a</b>                               |           |           |           | H | -3.939279 | 0.686094  | 2.002643  |
| SCF energy in Ethanol: -2889.875475 a.u.  |           |           |           | H | -2.290270 | 1.312958  | 2.101577  |
| Free energy in Ethanol: -2888.931704 a.u. |           |           |           | H | -3.615182 | 2.205410  | 2.858934  |
| P                                         | 0.273989  | 0.419312  | -0.687693 | C | 2.829880  | -2.699621 | 0.067031  |
| N                                         | -0.093225 | 0.804588  | -2.282077 | C | 3.812713  | -2.259290 | 0.983965  |
| C                                         | -0.098252 | 2.213217  | -2.667185 | C | 3.212668  | -3.034580 | -1.251572 |
| H                                         | 0.520962  | 2.364472  | -3.560353 | C | 5.140663  | -2.135058 | 0.558454  |
| H                                         | -1.119164 | 2.561883  | -2.872453 | C | 4.552791  | -2.899847 | -1.630666 |
| H                                         | 0.315870  | 2.823992  | -1.862587 | C | 5.533992  | -2.444326 | -0.746407 |
| C                                         | -0.554339 | -0.102488 | -3.328136 | H | 5.888551  | -1.791679 | 1.271424  |
| H                                         | -0.558860 | -1.128953 | -2.966941 | H | 4.837819  | -3.170983 | -2.645642 |
| H                                         | -1.566399 | 0.159824  | -3.663013 | C | 2.216193  | -3.565949 | -2.256673 |
| H                                         | 0.119274  | -0.036541 | -4.194409 | H | 1.588474  | -4.353132 | -1.824118 |
| O                                         | 0.537854  | -1.219822 | -0.970518 | H | 1.545827  | -2.772601 | -2.604188 |
| O                                         | -1.166087 | 0.335901  | 0.197066  | H | 2.730159  | -3.981792 | -3.129162 |
| C                                         | 0.321569  | -2.175013 | 0.012053  |   |           |           |           |

|    |           |           |           |                                           |           |           |           |
|----|-----------|-----------|-----------|-------------------------------------------|-----------|-----------|-----------|
| C  | 3.479734  | -1.929452 | 2.424623  | H                                         | -0.216070 | 6.008406  | 1.574006  |
| H  | 3.381420  | -2.833152 | 3.038922  | C                                         | 1.642996  | 1.768707  | 2.452821  |
| H  | 4.273880  | -1.322936 | 2.872575  | H                                         | 1.424757  | 0.932781  | 3.116130  |
| H  | 2.535916  | -1.382612 | 2.510465  | C                                         | 2.960759  | 1.747185  | 1.945480  |
| C  | 6.968475  | -2.272131 | -1.190021 | H                                         | 3.545586  | 0.864052  | 2.203362  |
| H  | 7.668650  | -2.467339 | -0.370219 | C                                         | 3.562765  | 2.611987  | 0.939674  |
| H  | 7.216514  | -2.947805 | -2.015705 | H                                         | 3.182364  | 3.632246  | 0.919046  |
| H  | 7.156484  | -1.247701 | -1.539138 | C                                         | 5.087733  | 2.580669  | 0.905044  |
| C  | -0.293391 | -5.010289 | 3.205146  | H                                         | 5.460114  | 1.553618  | 0.833458  |
| C  | -1.750866 | -5.350806 | 3.532328  | H                                         | 5.477729  | 3.018146  | 1.834055  |
| C  | -2.591342 | -4.071899 | 3.525120  | H                                         | 5.484294  | 3.146669  | 0.057719  |
| C  | -2.610100 | -3.460063 | 2.118244  | C                                         | 3.194832  | 2.133619  | -0.925504 |
| H  | -3.619584 | -4.273751 | 3.848790  | C                                         | 3.037881  | 3.296365  | -1.706453 |
| H  | -2.150660 | -6.050992 | 2.784815  | C                                         | 3.919426  | 1.063738  | -1.494798 |
| H  | -1.807027 | -5.858023 | 4.503010  | C                                         | 3.535766  | 3.373331  | -3.008022 |
| H  | 0.173038  | -4.561907 | 4.095685  | H                                         | 2.523002  | 4.160602  | -1.288413 |
| H  | 0.279305  | -5.924023 | 2.998478  | C                                         | 4.394416  | 1.128762  | -2.805770 |
| H  | -3.250405 | -4.086261 | 1.482126  | H                                         | 4.106209  | 0.164486  | -0.912531 |
| H  | -3.090223 | -2.475348 | 2.138484  | C                                         | 4.208269  | 2.284397  | -3.570054 |
| H  | -2.168276 | -3.353277 | 4.241416  | H                                         | 3.399765  | 4.286287  | -3.584156 |
| H  | -5.386221 | -0.038039 | -1.457209 | H                                         | 4.919517  | 0.274140  | -3.226724 |
| C  | -5.509454 | -2.667502 | -1.939217 | H                                         | 4.596609  | 2.342504  | -4.583635 |
| H  | -6.273836 | -2.811272 | -1.159613 |                                           |           |           |           |
| H  | -5.987013 | -2.054294 | -2.713793 |                                           |           |           |           |
| C  | -2.955242 | -4.029245 | -1.226399 | <b>TS9b</b>                               |           |           |           |
| C  | -5.122701 | -4.037745 | -2.506397 | SCF energy in Ethanol: -2889.875839 a.u.  |           |           |           |
| H  | -4.561305 | -3.908449 | -3.442662 | Free energy in Ethanol: -2888.931648 a.u. |           |           |           |
| H  | -6.026488 | -4.607327 | -2.755095 | P                                         | 0.062683  | 0.913274  | -0.596174 |
| C  | -4.254274 | -4.796869 | -1.499354 | N                                         | -0.454242 | 1.636698  | -2.022218 |
| H  | -2.324380 | -4.081351 | -2.128131 | C                                         | -0.459545 | 3.094332  | -2.107205 |
| H  | -2.375464 | -4.524637 | -0.445036 | H                                         | 0.158648  | 3.431963  | -2.949141 |
| H  | -4.814785 | -4.928785 | -0.562197 | H                                         | -1.482078 | 3.473062  | -2.236651 |
| H  | -4.015670 | -5.801900 | -1.868367 | H                                         | -0.050036 | 3.527578  | -1.191836 |
| Ni | 1.834698  | 1.419132  | 0.370858  | C                                         | -0.952622 | 0.970035  | -3.220527 |
| C  | -0.948465 | 5.093844  | 3.384504  | H                                         | -0.955961 | -0.109394 | -3.084364 |
| C  | -0.893099 | 3.956685  | 4.194093  | H                                         | -1.972429 | 1.300649  | -3.456782 |
| C  | -0.059907 | 2.893356  | 3.854078  | H                                         | -0.308437 | 1.214036  | -4.077609 |
| C  | 0.750677  | 2.925234  | 2.700430  | O                                         | 0.308282  | -0.615933 | -1.258966 |
| C  | 0.658232  | 4.071521  | 1.883661  | O                                         | -1.293661 | 0.595304  | 0.372430  |
| C  | -0.172074 | 5.138590  | 2.225018  | C                                         | 0.193363  | -1.776567 | -0.505962 |
| H  | -1.590404 | 5.929473  | 3.650376  | C                                         | -1.071273 | -2.158664 | -0.030943 |
| H  | -1.494760 | 3.899747  | 5.098007  | C                                         | 1.332411  | -2.579280 | -0.307021 |
| H  | -0.016486 | 2.019768  | 4.500613  | C                                         | -1.174473 | -3.251136 | 0.868493  |
| H  | 1.216896  | 4.123253  | 0.955940  | C                                         | -2.299547 | -1.410746 | -0.453354 |
|    |           |           |           | C                                         | 1.167958  | -3.713878 | 0.491433  |

|   |           |           |           |    |           |           |           |
|---|-----------|-----------|-----------|----|-----------|-----------|-----------|
| C | -0.037100 | -4.035400 | 1.123380  | H  | 6.833307  | -0.899018 | -2.963844 |
| C | -2.410214 | -0.049279 | -0.133720 | H  | 7.375375  | -2.357734 | -2.132918 |
| C | -3.364897 | -2.051444 | -1.132734 | H  | 6.636126  | -2.473713 | -3.739964 |
| H | 2.027566  | -4.362479 | 0.643583  | C  | -0.059882 | -5.216891 | 2.081237  |
| C | -3.618242 | 0.659671  | -0.280294 | C  | -1.472372 | -5.670646 | 2.462065  |
| C | -4.575146 | -1.357374 | -1.310593 | C  | -2.327185 | -4.449173 | 2.808384  |
| C | -4.687571 | -0.043629 | -0.843667 | C  | -2.491689 | -3.548814 | 1.576506  |
| C | -3.790480 | 2.081627  | 0.155011  | H  | -3.316174 | -4.749730 | 3.175020  |
| C | -4.148999 | 3.082806  | -0.776019 | H  | -1.933892 | -6.209786 | 1.622316  |
| C | -3.657206 | 2.428243  | 1.522483  | H  | -1.426101 | -6.373395 | 3.302715  |
| C | -4.309520 | 4.404100  | -0.337826 | H  | 0.479965  | -4.934038 | 2.997981  |
| C | -3.836936 | 3.757327  | 1.913659  | H  | 0.509022  | -6.048920 | 1.646101  |
| C | -4.148852 | 4.767851  | 0.998704  | H  | -3.192087 | -4.039068 | 0.886634  |
| H | -4.573716 | 5.167422  | -1.067862 | H  | -2.972162 | -2.604864 | 1.857805  |
| H | -3.740374 | 4.008128  | 2.968616  | H  | -1.845559 | -3.888318 | 3.622401  |
| C | -4.401339 | 2.790348  | -2.241112 | H  | -5.642127 | 0.467444  | -0.947100 |
| H | -5.459603 | 2.561556  | -2.426483 | C  | -5.791155 | -2.009758 | -1.952904 |
| H | -4.152236 | 3.660724  | -2.858045 | H  | -6.480583 | -2.328474 | -1.155590 |
| H | -3.825437 | 1.935387  | -2.599921 | H  | -6.340791 | -1.262932 | -2.539634 |
| C | -4.299066 | 6.203373  | 1.446372  | C  | -3.172819 | -3.422578 | -1.770079 |
| H | -4.818463 | 6.271100  | 2.409223  | C  | -5.450809 | -3.225029 | -2.822449 |
| H | -3.320674 | 6.685814  | 1.574464  | H  | -4.981695 | -2.893564 | -3.759777 |
| H | -4.861783 | 6.794609  | 0.716228  | H  | -6.370555 | -3.754684 | -3.099123 |
| C | -3.360160 | 1.393061  | 2.583608  | C  | -4.486298 | -4.151744 | -2.077133 |
| H | -3.956531 | 0.485010  | 2.441004  | H  | -2.628904 | -3.270598 | -2.715964 |
| H | -2.306608 | 1.095616  | 2.563085  | H  | -2.518210 | -4.052022 | -1.163859 |
| H | -3.578918 | 1.789176  | 3.580451  | H  | -4.954797 | -4.488155 | -1.140595 |
| C | 2.663689  | -2.330313 | -0.946216 | H  | -4.276327 | -5.052868 | -2.666265 |
| C | 3.803702  | -2.090047 | -0.145731 | H  | 4.174076  | 4.674320  | 0.969893  |
| C | 2.811696  | -2.457093 | -2.346059 | Ni | 1.515369  | 1.985998  | 0.536828  |
| C | 5.057763  | -1.977985 | -0.758184 | C  | 1.252915  | 2.174923  | 2.599331  |
| C | 4.084762  | -2.336840 | -2.913705 | C  | 2.201596  | 3.062292  | 2.044621  |
| C | 5.223432  | -2.097407 | -2.140440 | H  | 1.918409  | 4.113973  | 1.959283  |
| H | 5.929292  | -1.792624 | -0.132459 | C  | 3.396831  | 2.667052  | 1.303202  |
| H | 4.188762  | -2.447761 | -3.991555 | H  | 3.765039  | 1.665501  | 1.532781  |
| C | 1.632774  | -2.751148 | -3.246067 | C  | 4.534255  | 3.680518  | 1.253755  |
| H | 1.033310  | -3.586789 | -2.867154 | H  | 5.311143  | 3.383384  | 0.543884  |
| H | 0.967346  | -1.884008 | -3.320803 | H  | 4.983679  | 3.760275  | 2.253459  |
| H | 1.969774  | -3.005856 | -4.255929 | C  | 3.051058  | 2.516075  | -0.640955 |
| C | 3.712369  | -1.946817 | 1.358123  | C  | 3.824447  | 1.552818  | -1.316892 |
| H | 2.848121  | -1.351412 | 1.664946  | C  | 2.852871  | 3.758155  | -1.278920 |
| H | 3.617818  | -2.917916 | 1.859610  | C  | 4.329019  | 1.801178  | -2.594290 |
| H | 4.613419  | -1.467002 | 1.753495  | H  | 4.018957  | 0.590886  | -0.852044 |
| C | 6.586878  | -1.953337 | -2.777455 | C  | 3.348750  | 4.005855  | -2.560356 |

|   |           |           |           |   |           |          |           |
|---|-----------|-----------|-----------|---|-----------|----------|-----------|
| H | 2.306383  | 4.547272  | -0.763715 | C | -4.848873 | 0.913183 | -1.105891 |
| C | 4.089443  | 3.025513  | -3.225846 | C | -4.119714 | 2.097103 | -0.956937 |
| H | 4.902004  | 1.028269  | -3.100839 | C | -2.053403 | 3.424537 | -0.428365 |
| H | 3.169284  | 4.969133  | -3.033615 | C | -1.856313 | 4.224824 | -1.575752 |
| H | 4.487345  | 3.218592  | -4.218902 | C | -1.593544 | 3.893782 | 0.828275  |
| C | 1.572544  | 0.903592  | 3.307419  | C | -1.161245 | 5.436812 | -1.457265 |
| C | 0.631064  | -0.141024 | 3.375555  | C | -0.920207 | 5.114215 | 0.898328  |
| C | 2.780089  | 0.741054  | 4.012614  | C | -0.677306 | 5.897555 | -0.234760 |
| C | 0.885824  | -1.294308 | 4.115790  | H | -0.999882 | 6.035546 | -2.352344 |
| H | -0.298946 | -0.047297 | 2.823189  | H | -0.565454 | 5.458703 | 1.867188  |
| C | 3.038808  | -0.416799 | 4.747252  | C | -2.388487 | 3.855187 | -2.945835 |
| H | 3.506529  | 1.548838  | 4.009879  | H | -3.359118 | 4.333165 | -3.137554 |
| C | 2.092377  | -1.441672 | 4.805625  | H | -1.706359 | 4.198837 | -3.731675 |
| H | 0.139708  | -2.084533 | 4.148095  | H | -2.537502 | 2.780576 | -3.062685 |
| H | 3.977337  | -0.510148 | 5.288670  | C | 0.081090  | 7.199425 | -0.124055 |
| H | 2.289612  | -2.340061 | 5.384698  | H | -0.423648 | 7.902672 | 0.550774  |
| H | 0.313245  | 2.630657  | 2.910298  | H | 1.087775  | 7.033431 | 0.279164  |

### IM13a

SCF energy in Ethanol: -2889.920037 a.u.

Free energy in Ethanol: -2888.973966 a.u.

|   |           |           |           |   |           |           |           |
|---|-----------|-----------|-----------|---|-----------|-----------|-----------|
| P | 0.316334  | 0.070916  | -0.632439 | H | -1.671594 | 3.766211  | 2.977700  |
| N | 0.329531  | 0.667809  | -2.205316 | C | 0.590224  | -3.888529 | -0.128990 |
| C | 1.318999  | 1.680131  | -2.562217 | C | 1.727867  | -4.057273 | 0.693891  |
| H | 1.826592  | 1.397549  | -3.493887 | C | 0.619971  | -4.357127 | -1.461471 |
| H | 0.849918  | 2.664916  | -2.697486 | C | 2.871252  | -4.666329 | 0.163398  |
| H | 2.074132  | 1.762494  | -1.776182 | C | 1.784325  | -4.962095 | -1.948143 |
| C | -0.640591 | 0.381369  | -3.256738 | C | 2.925375  | -5.120705 | -1.157202 |
| H | -1.398946 | -0.311585 | -2.896554 | H | 3.743624  | -4.789468 | 0.802972  |
| H | -1.130619 | 1.301232  | -3.598531 | H | 1.793617  | -5.329554 | -2.972885 |
| H | -0.132182 | -0.073126 | -4.119928 | C | -0.585086 | -4.243232 | -2.367654 |
| O | -0.510503 | -1.354235 | -1.017079 | H | -1.496783 | -4.594946 | -1.871563 |
| O | -0.901088 | 0.843886  | 0.257245  | H | -0.760296 | -3.202781 | -2.662926 |
| C | -1.175516 | -2.049648 | -0.018527 | H | -0.443272 | -4.835162 | -3.277564 |
| C | -2.379336 | -1.527096 | 0.475255  | C | 1.747203  | -3.597536 | 2.137096  |
| C | -0.653409 | -3.275209 | 0.432762  | H | 1.173396  | -4.267236 | 2.789263  |
| C | -3.000592 | -2.150038 | 1.587922  | H | 2.773403  | -3.572934 | 2.518192  |
| C | -2.969575 | -0.300946 | -0.150462 | H | 1.317006  | -2.596724 | 2.247882  |
| C | -1.359010 | -3.923533 | 1.449014  | C | 4.184367  | -5.742378 | -1.715994 |
| C | -2.488699 | -3.370450 | 2.061689  | H | 4.718546  | -6.321788 | -0.954745 |
| C | -2.222694 | 0.889908  | -0.153625 | H | 3.963434  | -6.409134 | -2.556448 |
| C | -4.267991 | -0.307164 | -0.717257 | H | 4.877380  | -4.972891 | -2.082320 |
| H | -0.992554 | -4.886292 | 1.798897  | C | -3.093750 | -4.101767 | 3.251090  |
| C | -2.792383 | 2.126382  | -0.517927 | C | -4.460644 | -3.558049 | 3.679683  |

|    |           |           |           |   |          |           |           |
|----|-----------|-----------|-----------|---|----------|-----------|-----------|
| C  | -4.420324 | -2.028172 | 3.705226  | H | 6.955728 | -0.612921 | 1.270711  |
| C  | -4.175410 | -1.482119 | 2.292505  | C | 4.778504 | -0.066037 | -0.354626 |
| H  | -5.357208 | -1.615581 | 4.098859  | C | 5.516489 | 0.695665  | -1.270833 |
| H  | -5.235320 | -3.888093 | 2.972620  | C | 3.884524 | -1.032994 | -0.862275 |
| H  | -4.733306 | -3.965110 | 4.660807  | C | 5.385703 | 0.491507  | -2.646609 |
| H  | -2.399033 | -4.021156 | 4.101104  | H | 6.201572 | 1.455883  | -0.900708 |
| H  | -3.160150 | -5.173724 | 3.022706  | C | 3.757210 | -1.242643 | -2.242504 |
| H  | -5.096802 | -1.616552 | 1.709584  | H | 3.364735 | -1.714839 | -0.178432 |
| H  | -4.006228 | -0.400042 | 2.327690  | C | 4.505202 | -0.477536 | -3.137441 |
| H  | -3.618633 | -1.695951 | 4.380021  | H | 5.973760 | 1.090757  | -3.337508 |
| H  | -4.595335 | 3.039283  | -1.219981 | H | 3.072626 | -2.005721 | -2.601615 |
| C  | -6.271957 | 0.995163  | -1.640034 | H | 4.407061 | -0.634452 | -4.208401 |
| H  | -6.935578 | 1.320502  | -0.823600 |   |          |           |           |
| H  | -6.332975 | 1.781111  | -2.403356 |   |          |           |           |
| C  | -4.981017 | -1.619492 | -1.022019 |   |          |           |           |
| C  | -6.796030 | -0.332662 | -2.198027 |   |          |           |           |
| H  | -6.312587 | -0.548867 | -3.161469 |   |          |           |           |
| H  | -7.872625 | -0.256532 | -2.393702 |   |          |           |           |
| C  | -6.494295 | -1.469194 | -1.217467 |   |          |           |           |
| H  | -4.548018 | -2.020073 | -1.952561 |   |          |           |           |
| H  | -4.766977 | -2.373403 | -0.261901 |   |          |           |           |
| H  | -6.975776 | -1.254335 | -0.252188 |   |          |           |           |
| H  | -6.914115 | -2.417048 | -1.576110 |   |          |           |           |
| Ni | 2.145896  | -0.076579 | 0.438694  |   |          |           |           |
| C  | 2.958922  | 5.199695  | 2.127945  |   |          |           |           |
| C  | 2.270685  | 4.537292  | 3.147509  |   |          |           |           |
| C  | 2.139830  | 3.150097  | 3.119148  |   |          |           |           |
| C  | 2.695370  | 2.377966  | 2.079769  |   |          |           |           |
| C  | 3.363570  | 3.067253  | 1.048018  |   |          |           |           |
| C  | 3.496243  | 4.455472  | 1.075382  |   |          |           |           |
| H  | 3.072597  | 6.280414  | 2.152363  |   |          |           |           |
| H  | 1.841268  | 5.101392  | 3.972103  |   |          |           |           |
| H  | 1.611763  | 2.644189  | 3.924284  |   |          |           |           |
| H  | 3.765581  | 2.514373  | 0.205220  |   |          |           |           |
| H  | 4.019945  | 4.958261  | 0.265787  |   |          |           |           |
| C  | 2.572632  | 0.902621  | 2.155622  |   |          |           |           |
| H  | 1.849965  | 0.580836  | 2.906501  |   |          |           |           |
| C  | 3.550801  | -0.066290 | 1.822523  |   |          |           |           |
| H  | 3.457748  | -1.015965 | 2.355381  |   |          |           |           |
| C  | 4.905146  | 0.151337  | 1.154907  |   |          |           |           |
| H  | 5.225896  | 1.189063  | 1.312859  |   |          |           |           |
| C  | 5.986249  | -0.766466 | 1.758592  |   |          |           |           |
| H  | 5.713582  | -1.822004 | 1.636449  |   |          |           |           |
| H  | 6.102824  | -0.567397 | 2.830356  |   |          |           |           |

**IM13b**

SCF energy in Ethanol: -2889.916948 a.u.

Free energy in Ethanol: -2888.972593 a.u.

|   |           |           |           |
|---|-----------|-----------|-----------|
| P | 0.178934  | 0.693146  | -0.777455 |
| N | -0.161382 | 1.493149  | -2.219945 |
| C | 0.442424  | 2.799638  | -2.460596 |
| H | 1.025813  | 2.788490  | -3.391663 |
| H | -0.326335 | 3.581731  | -2.534480 |
| H | 1.116912  | 3.058956  | -1.638082 |
| C | -1.003055 | 1.015404  | -3.311338 |
| H | -1.507461 | 0.092027  | -3.032278 |
| H | -1.757713 | 1.768268  | -3.571837 |
| H | -0.392964 | 0.823427  | -4.206951 |
| O | -0.145242 | -0.853087 | -1.389255 |
| O | -1.150107 | 0.828234  | 0.272782  |
| C | -0.449454 | -1.892977 | -0.525076 |
| C | -1.709557 | -1.909712 | 0.091600  |
| C | 0.485878  | -2.926931 | -0.338130 |
| C | -1.980630 | -2.883773 | 1.086902  |
| C | -2.734537 | -0.882891 | -0.283086 |
| C | 0.138114  | -3.932845 | 0.565933  |
| C | -1.045191 | -3.908515 | 1.311775  |
| C | -2.438011 | 0.476097  | -0.087473 |
| C | -3.998467 | -1.245061 | -0.811178 |
| H | 0.833800  | -4.755503 | 0.715471  |
| C | -3.419128 | 1.480062  | -0.202800 |
| C | -4.986481 | -0.254609 | -0.959465 |
| C | -4.690672 | 1.067876  | -0.611785 |
| C | -3.145702 | 2.917161  | 0.115572  |
| C | -3.279184 | 3.915863  | -0.873872 |
| C | -2.798307 | 3.295946  | 1.436277  |



|   |           |           |           |    |           |           |           |
|---|-----------|-----------|-----------|----|-----------|-----------|-----------|
| C | -3.010604 | 5.251487  | -0.543352 | H  | -0.556789 | -4.795068 | 3.199916  |
| C | -2.550560 | 4.640592  | 1.721033  | H  | -0.966216 | -5.959515 | 1.956360  |
| C | -2.634950 | 5.636910  | 0.742627  | H  | -4.113752 | -3.148072 | 1.358782  |
| H | -3.104782 | 6.010024  | -1.318759 | H  | -3.454498 | -1.743590 | 2.160822  |
| H | -2.291501 | 4.918725  | 2.741217  | H  | -2.471865 | -3.134403 | 3.932829  |
| C | -3.733818 | 3.616138  | -2.287385 | H  | -5.476044 | 1.816631  | -0.688160 |
| H | -4.822714 | 3.723272  | -2.386522 | C  | -6.391559 | -0.584856 | -1.443070 |
| H | -3.280341 | 4.317077  | -2.997008 | H  | -7.058318 | -0.650794 | -0.569064 |
| H | -3.486560 | 2.599680  | -2.598692 | H  | -6.775838 | 0.246035  | -2.048101 |
| C | -2.324850 | 7.078539  | 1.073235  | C  | -4.249464 | -2.655100 | -1.332841 |
| H | -2.772934 | 7.376491  | 2.028442  | C  | -6.477683 | -1.899556 | -2.225819 |
| H | -1.242702 | 7.243980  | 1.161043  | H  | -6.025577 | -1.771754 | -3.219717 |
| H | -2.698573 | 7.756672  | 0.298875  | H  | -7.528382 | -2.169506 | -2.387895 |
| C | -2.719473 | 2.286776  | 2.559510  | C  | -5.735009 | -3.007368 | -1.473990 |
| H | -3.572839 | 1.599479  | 2.545410  | H  | -3.778435 | -2.726061 | -2.326244 |
| H | -1.812223 | 1.678256  | 2.483331  | H  | -3.736284 | -3.400495 | -0.722177 |
| H | -2.706284 | 2.791257  | 3.530957  | H  | -6.184799 | -3.136634 | -0.478642 |
| C | 1.785911  | -2.999299 | -1.076120 | H  | -5.836340 | -3.968176 | -1.993429 |
| C | 3.010084  | -2.920928 | -0.372320 | H  | 5.383550  | 3.998726  | 1.527341  |
| C | 1.797843  | -3.218970 | -2.471893 | Ni | 1.927487  | 1.378293  | 0.198081  |
| C | 4.211919  | -3.039321 | -1.080130 | C  | 1.991711  | 1.887942  | 2.151685  |
| C | 3.024288  | -3.335674 | -3.136174 | C  | 3.042180  | 2.495189  | 1.439161  |
| C | 4.244623  | -3.241339 | -2.462457 | H  | 2.869783  | 3.522815  | 1.106258  |
| H | 5.149948  | -2.970601 | -0.531905 | C  | 4.474613  | 2.032292  | 1.199694  |
| H | 3.023011  | -3.515172 | -4.209901 | H  | 4.606803  | 1.025404  | 1.612589  |
| C | 0.516630  | -3.357751 | -3.263153 | C  | 5.528533  | 2.954849  | 1.829116  |
| H | -0.175596 | -4.062939 | -2.789163 | H  | 6.545017  | 2.656142  | 1.545195  |
| H | -0.005890 | -2.397849 | -3.342506 | H  | 5.454745  | 2.923442  | 2.921762  |
| H | 0.724026  | -3.715473 | -4.276807 | C  | 4.545468  | 1.909414  | -0.324610 |
| C | 3.063334  | -2.715384 | 1.127011  | C  | 3.934506  | 0.786200  | -0.927063 |
| H | 2.341789  | -1.968529 | 1.470575  | C  | 5.050438  | 2.915627  | -1.159739 |
| H | 2.841431  | -3.640841 | 1.673091  | C  | 3.845689  | 0.675855  | -2.323499 |
| H | 4.062218  | -2.390949 | 1.436151  | H  | 3.641891  | -0.067316 | -0.313041 |
| C | 5.558317  | -3.331875 | -3.204044 | C  | 4.958524  | 2.804238  | -2.549433 |
| H | 5.977400  | -2.333934 | -3.391244 | H  | 5.524662  | 3.791773  | -0.727555 |
| H | 6.305925  | -3.892187 | -2.631061 | C  | 4.349928  | 1.690745  | -3.136611 |
| H | 5.437515  | -3.823879 | -4.175045 | H  | 3.396831  | -0.212998 | -2.757310 |
| C | -1.253487 | -4.983348 | 2.368743  | H  | 5.367917  | 3.592033  | -3.177355 |
| C | -2.680442 | -5.033795 | 2.924630  | H  | 4.284684  | 1.610091  | -4.218469 |
| C | -3.165701 | -3.613902 | 3.227103  | C  | 2.063395  | 0.728680  | 3.080454  |
| C | -3.245729 | -2.794866 | 1.932514  | C  | 0.930268  | -0.089461 | 3.262774  |
| H | -4.149317 | -3.627666 | 3.712030  | C  | 3.202389  | 0.447819  | 3.857187  |
| H | -3.354350 | -5.497090 | 2.189639  | C  | 0.942802  | -1.149538 | 4.166238  |
| H | -2.709985 | -5.663288 | 3.822223  | H  | 0.042070  | 0.106170  | 2.668715  |

|   |          |           |          |   |           |          |           |
|---|----------|-----------|----------|---|-----------|----------|-----------|
| C | 3.217595 | -0.619451 | 4.757804 | C | -1.410462 | 4.907661 | -2.073081 |
| H | 4.071234 | 1.094129  | 3.785121 | H | -2.228427 | 5.569352 | -2.389024 |
| C | 2.090315 | -1.426382 | 4.915990 | H | -0.500917 | 5.267990 | -2.564976 |
| H | 0.054117 | -1.765522 | 4.281333 | H | -1.640991 | 3.912728 | -2.459004 |
| H | 4.110876 | -0.809554 | 5.348133 | C | 0.672345  | 7.061496 | 1.967176  |
| H | 2.101153 | -2.253633 | 5.620858 | H | 0.237656  | 7.526288 | 2.859543  |
| H | 1.101826 | 2.504021  | 2.287133 | H | 1.629814  | 6.616867 | 2.269754  |

### IM11

SCF energy in Ethanol: -3455.893614 a.u.

Free energy in Ethanol: -3454.708223 a.u.

|   |           |           |           |   |           |           |           |
|---|-----------|-----------|-----------|---|-----------|-----------|-----------|
| P | -0.211263 | 0.377209  | -0.364760 | H | -2.495776 | 3.654897  | 3.666163  |
| N | 0.060032  | 1.155776  | -1.808270 | C | -1.130630 | -3.843601 | -0.934739 |
| C | 1.201476  | 2.067708  | -1.935858 | C | -0.346660 | -4.744787 | -0.178842 |
| H | 1.821752  | 1.781005  | -2.790159 | C | -1.066799 | -3.890157 | -2.348451 |
| H | 0.855346  | 3.099659  | -2.067053 | C | 0.506983  | -5.633907 | -0.842496 |
| H | 1.831485  | 2.021689  | -1.047357 | C | -0.203357 | -4.799663 | -2.966337 |
| C | -0.739765 | 1.039338  | -3.027102 | C | 0.602754  | -5.675468 | -2.234768 |
| H | -1.628903 | 0.437120  | -2.855114 | H | 1.112321  | -6.316314 | -0.248403 |
| H | -1.048208 | 2.034030  | -3.370257 | H | -0.167734 | -4.829301 | -4.053633 |
| H | -0.140369 | 0.572620  | -3.820177 | C | -1.934777 | -3.011784 | -3.221950 |
| O | -1.095504 | -0.902277 | -1.004519 | H | -2.978228 | -3.009858 | -2.886714 |
| O | -1.411530 | 1.171734  | 0.514866  | H | -1.588361 | -1.972837 | -3.212916 |
| C | -2.166894 | -1.546207 | -0.393087 | H | -1.913920 | -3.361311 | -4.258928 |
| C | -3.300437 | -0.807099 | -0.013990 | C | -0.400545 | -4.799879 | 1.333023  |
| C | -2.134376 | -2.951938 | -0.268957 | H | -0.537390 | -3.813800 | 1.782205  |
| C | -4.287884 | -1.420766 | 0.800047  | H | -1.225226 | -5.433274 | 1.686209  |
| C | -3.499915 | 0.602365  | -0.483861 | H | 0.524683  | -5.225328 | 1.734568  |
| C | -3.188129 | -3.538548 | 0.437951  | C | 1.557279  | -6.621760 | -2.924903 |
| C | -4.216596 | -2.803310 | 1.035696  | H | 2.555803  | -6.175176 | -3.022707 |
| C | -2.585843 | 1.588352  | -0.100326 | H | 1.673930  | -7.555287 | -2.363438 |
| C | -4.614462 | 0.968877  | -1.280623 | H | 1.213487  | -6.872856 | -3.934092 |
| H | -3.197341 | -4.621282 | 0.534464  | C | -5.220620 | -3.533455 | 1.914424  |
| C | -2.830072 | 2.961242  | -0.280531 | C | -6.478186 | -2.713830 | 2.221636  |
| C | -4.860019 | 2.334188  | -1.516067 | C | -6.081393 | -1.287291 | 2.609618  |
| C | -3.996978 | 3.294029  | -0.973893 | C | -5.399380 | -0.586288 | 1.427436  |
| C | -1.932928 | 4.020980  | 0.278064  | H | -6.957054 | -0.705774 | 2.921842  |
| C | -1.249788 | 4.920408  | -0.567425 | H | -7.130185 | -2.681000 | 1.337028  |
| C | -1.814250 | 4.162470  | 1.682971  | H | -7.052666 | -3.196808 | 3.020953  |
| C | -0.415605 | 5.894366  | -0.000723 | H | -4.729287 | -3.795070 | 2.864310  |
| C | -0.977907 | 5.153201  | 2.202942  | H | -5.486740 | -4.489498 | 1.445242  |
| C | -0.253340 | 6.022395  | 1.378264  | H | -6.167877 | -0.352229 | 0.677987  |
| H | 0.117780  | 6.573628  | -0.663065 | H | -4.993796 | 0.381889  | 1.742409  |
| H | -0.901922 | 5.260243  | 3.283598  | H | -5.399016 | -1.320308 | 3.470881  |

|    |           |           |           |                                           |           |           |           |
|----|-----------|-----------|-----------|-------------------------------------------|-----------|-----------|-----------|
| H  | -4.228258 | 4.347018  | -1.118202 | H                                         | 2.314812  | -3.599439 | 0.540161  |
| C  | -6.072994 | 2.809389  | -2.303548 | H                                         | 2.688788  | -2.289033 | 1.675043  |
| H  | -6.846136 | 3.138211  | -1.591904 | H                                         | 1.212617  | -2.238909 | 0.687198  |
| H  | -5.804990 | 3.700521  | -2.884751 | C                                         | 5.173626  | -2.536510 | 0.851991  |
| C  | -5.465096 | -0.091293 | -1.970247 | H                                         | 6.255286  | -2.640645 | 0.714216  |
| C  | -6.670626 | 1.734275  | -3.217299 | H                                         | 5.002288  | -1.707777 | 1.541541  |
| H  | -6.010909 | 1.569482  | -4.080870 | H                                         | 4.797530  | -3.465564 | 1.297369  |
| H  | -7.633629 | 2.076391  | -3.614823 | C                                         | 4.761980  | -3.478100 | -1.426186 |
| C  | -6.829695 | 0.421985  | -2.445223 | H                                         | 4.207291  | -4.354062 | -1.067488 |
| H  | -4.899756 | -0.446547 | -2.846384 | H                                         | 4.468320  | -3.272470 | -2.458197 |
| H  | -5.589565 | -0.971514 | -1.336157 | H                                         | 5.828267  | -3.729518 | -1.426962 |
| H  | -7.488301 | 0.586761  | -1.579939 | C                                         | 4.543219  | 1.218745  | -1.807884 |
| H  | -7.311295 | -0.342285 | -3.066972 | C                                         | 4.555131  | 0.835250  | -3.162073 |
| Ni | 1.654528  | 0.416461  | 0.955269  | C                                         | 4.521475  | 2.602546  | -1.555306 |
| C  | 0.509950  | -2.843926 | 5.094525  | C                                         | 4.509794  | 1.767748  | -4.202304 |
| C  | -0.572553 | -2.491904 | 4.283748  | H                                         | 4.626129  | -0.223365 | -3.397348 |
| C  | -0.508169 | -1.352488 | 3.486315  | C                                         | 4.474980  | 3.550194  | -2.582951 |
| C  | 0.637118  | -0.528833 | 3.477010  | H                                         | 4.547177  | 2.952284  | -0.526659 |
| C  | 1.711075  | -0.890149 | 4.312996  | C                                         | 4.461415  | 3.134943  | -3.916182 |
| C  | 1.647395  | -2.034714 | 5.107167  | H                                         | 4.523601  | 1.429970  | -5.237122 |
| H  | 0.462086  | -3.732244 | 5.718329  | H                                         | 4.460637  | 4.612266  | -2.343914 |
| H  | -1.470932 | -3.103344 | 4.276295  | H                                         | 4.430609  | 3.866140  | -4.721171 |
| H  | -1.358434 | -1.080511 | 2.865226  | O                                         | 5.268332  | 0.587437  | 0.592607  |
| H  | 2.587497  | -0.256654 | 4.375894  | H                                         | 4.308564  | 3.038231  | 3.150008  |
| H  | 2.488136  | -2.286863 | 5.747969  | C                                         | 6.667775  | 0.775390  | 0.497594  |
| C  | 0.584003  | 0.701608  | 2.652893  | H                                         | 7.124748  | -0.055041 | -0.058519 |
| H  | -0.432350 | 1.034823  | 2.482501  | H                                         | 6.899804  | 1.697917  | -0.062105 |
| C  | 1.548959  | 1.747830  | 2.555743  | C                                         | 7.280334  | 0.856116  | 1.892969  |
| H  | 1.158521  | 2.731425  | 2.292280  | H                                         | 8.365228  | 1.007898  | 1.830769  |
| C  | 2.918227  | 1.569368  | 2.459721  | H                                         | 6.854557  | 1.688370  | 2.465991  |
| H  | 3.402771  | 0.654131  | 2.783853  | H                                         | 7.093764  | -0.068810 | 2.450767  |
| C  | 3.832553  | 2.732172  | 2.206247  |                                           |           |           |           |
| H  | 4.622372  | 2.428538  | 1.519068  |                                           |           |           |           |
| H  | 3.290333  | 3.596400  | 1.806283  | <b>IM12</b>                               |           |           |           |
| B  | 4.597238  | 0.102818  | -0.618024 | SCF energy in Ethanol: -3455.899472 a.u.  |           |           |           |
| O  | 3.151268  | -0.372527 | -0.126173 | Free energy in Ethanol: -3454.715924 a.u. |           |           |           |
| O  | 5.151044  | -1.138913 | -1.139467 | P                                         | -0.305997 | 0.247472  | -0.574088 |
| C  | 3.035455  | -1.802690 | -0.425049 | N                                         | -0.108571 | 0.936850  | -2.076079 |
| C  | 4.536807  | -2.254606 | -0.526649 | C                                         | 1.028185  | 1.829347  | -2.325578 |
| C  | 2.303494  | -1.965917 | -1.763563 | H                                         | 1.542917  | 1.524579  | -3.242971 |
| H  | 2.867187  | -1.493535 | -2.571271 | H                                         | 0.689175  | 2.866331  | -2.431507 |
| H  | 2.146966  | -3.021258 | -2.006571 | H                                         | 1.752617  | 1.783701  | -1.513346 |
| H  | 1.317141  | -1.499940 | -1.718363 | C                                         | -1.044596 | 0.847577  | -3.198065 |
| C  | 2.271769  | -2.515269 | 0.690776  | H                                         | -1.914210 | 0.250117  | -2.934046 |
|    |           |           |           | H                                         | -1.378175 | 1.849101  | -3.495090 |

|   |           |           |           |    |           |           |           |
|---|-----------|-----------|-----------|----|-----------|-----------|-----------|
| H | -0.542224 | 0.383708  | -4.057451 | C  | -2.638741 | -3.180142 | -2.984443 |
| O | -1.346766 | -0.965097 | -1.062394 | H  | -3.607276 | -3.113194 | -2.476190 |
| O | -1.303794 | 1.186604  | 0.393148  | H  | -2.266120 | -2.157048 | -3.107250 |
| C | -2.328447 | -1.530981 | -0.251461 | H  | -2.808782 | -3.594447 | -3.983149 |
| C | -3.349430 | -0.715190 | 0.259898  | C  | -0.343963 | -4.664160 | 1.346537  |
| C | -2.326310 | -2.925611 | -0.053047 | H  | -0.348190 | -3.630523 | 1.699056  |
| C | -4.221103 | -1.238951 | 1.249057  | H  | -1.110634 | -5.202619 | 1.919351  |
| C | -3.547746 | 0.680321  | -0.250945 | H  | 0.623760  | -5.101645 | 1.610592  |
| C | -3.274521 | -3.424875 | 0.844522  | C  | 0.736665  | -6.912996 | -3.024104 |
| C | -4.167103 | -2.610283 | 1.549120  | H  | 1.686260  | -6.500677 | -3.391324 |
| C | -2.539345 | 1.633240  | -0.065979 | H  | 0.980056  | -7.779391 | -2.399656 |
| C | -4.752344 | 1.068670  | -0.890610 | H  | 0.179755  | -7.269333 | -3.897599 |
| H | -3.306542 | -4.499248 | 1.008099  | C  | -5.048057 | -3.244839 | 2.614504  |
| C | -2.745405 | 3.006651  | -0.284401 | C  | -6.210562 | -2.352989 | 3.061959  |
| C | -4.966031 | 2.431445  | -1.167353 | C  | -5.705043 | -0.928339 | 3.302091  |
| C | -3.986516 | 3.367226  | -0.816447 | C  | -5.185054 | -0.321195 | 1.992409  |
| C | -1.739149 | 4.051356  | 0.083428  | H  | -6.500033 | -0.291338 | 3.707859  |
| C | -1.158806 | 4.883873  | -0.898067 | H  | -6.990542 | -2.335581 | 2.287372  |
| C | -1.420573 | 4.259754  | 1.447570  | H  | -6.671825 | -2.767107 | 3.966383  |
| C | -0.233446 | 5.860683  | -0.507849 | H  | -4.423216 | -3.477819 | 3.490322  |
| C | -0.503371 | 5.256974  | 1.790561  | H  | -5.420088 | -4.211177 | 2.250130  |
| C | 0.116818  | 6.060313  | 0.827482  | H  | -6.049404 | -0.084736 | 1.356663  |
| H | 0.220060  | 6.485763  | -1.274743 | H  | -4.694463 | 0.639125  | 2.188174  |
| H | -0.276311 | 5.418463  | 2.842670  | H  | -4.901376 | -0.947941 | 4.051890  |
| C | -1.524864 | 4.793654  | -2.364817 | H  | -4.187741 | 4.423031  | -0.983309 |
| H | -2.367249 | 5.456361  | -2.605406 | C  | -6.260631 | 2.934207  | -1.790570 |
| H | -0.684697 | 5.104100  | -2.994804 | H  | -6.897164 | 3.345585  | -0.991944 |
| H | -1.822609 | 3.784904  | -2.658363 | H  | -6.041225 | 3.775577  | -2.459590 |
| C | 1.138665  | 7.100875  | 1.222537  | C  | -5.750307 | 0.025144  | -1.379717 |
| H | 0.899499  | 7.550054  | 2.192883  | C  | -7.045386 | 1.849019  | -2.535021 |
| H | 2.141192  | 6.660310  | 1.308240  | H  | -6.537815 | 1.601364  | -3.478007 |
| H | 1.200037  | 7.905073  | 0.481772  | H  | -8.040813 | 2.224838  | -2.800299 |
| C | -2.080446 | 3.460007  | 2.550021  | C  | -7.145795 | 0.590610  | -1.669489 |
| H | -3.168206 | 3.419427  | 2.421678  | H  | -5.347491 | -0.405039 | -2.310451 |
| H | -1.718326 | 2.426104  | 2.574322  | H  | -5.818406 | -0.813854 | -0.684155 |
| H | -1.871815 | 3.906849  | 3.527039  | H  | -7.651639 | 0.838162  | -0.724780 |
| C | -1.472127 | -3.891020 | -0.817050 | H  | -7.755436 | -0.176359 | -2.162174 |
| C | -0.581862 | -4.756581 | -0.143926 | Ni | 1.522320  | -0.160449 | 0.497344  |
| C | -1.658111 | -4.035556 | -2.213008 | C  | 2.271905  | -3.336028 | 4.321196  |
| C | 0.111201  | -5.728972 | -0.874031 | C  | 0.913283  | -3.004733 | 4.374794  |
| C | -0.941711 | -5.020027 | -2.900032 | C  | 0.439747  | -1.888854 | 3.691918  |
| C | -0.047643 | -5.877076 | -2.252775 | C  | 1.312557  | -1.050691 | 2.965366  |
| H | 0.799918  | -6.385005 | -0.344884 | C  | 2.682451  | -1.395425 | 2.922329  |
| H | -1.098579 | -5.127766 | -3.971724 | C  | 3.145582  | -2.535144 | 3.586471  |

|   |           |           |           |                                           |           |           |           |
|---|-----------|-----------|-----------|-------------------------------------------|-----------|-----------|-----------|
| H | 2.642763  | -4.208876 | 4.852093  | H                                         | 3.596960  | 4.868438  | -0.534690 |
| H | 0.224119  | -3.620683 | 4.947020  | H                                         | 4.341055  | 5.166763  | -2.893635 |
| H | -0.618425 | -1.639975 | 3.730776  | O                                         | 4.758599  | 0.184326  | 0.906429  |
| H | 3.394408  | -0.787825 | 2.366846  | H                                         | 3.019223  | 3.544915  | 4.217282  |
| H | 4.202115  | -2.784579 | 3.535696  | C                                         | 6.058145  | 0.614479  | 1.259939  |
| C | 0.755346  | 0.124920  | 2.246794  | H                                         | 6.810381  | 0.049232  | 0.689540  |
| H | -0.332414 | 0.152518  | 2.299912  | H                                         | 6.198477  | 1.677634  | 1.002978  |
| C | 1.338577  | 1.475820  | 2.387041  | C                                         | 6.293579  | 0.414962  | 2.753190  |
| H | 0.757783  | 2.265400  | 1.911273  | H                                         | 7.301014  | 0.746186  | 3.033772  |
| C | 2.463413  | 1.829853  | 3.045597  | H                                         | 5.570079  | 0.987932  | 3.345134  |
| H | 3.047672  | 1.069350  | 3.556811  | H                                         | 6.192655  | -0.642262 | 3.025803  |
| C | 2.965228  | 3.236787  | 3.163449  |                                           |           |           |           |
| H | 3.983321  | 3.325797  | 2.760913  |                                           |           |           |           |
| H | 2.320837  | 3.943518  | 2.630009  |                                           |           |           |           |
| B | 4.468843  | 0.131607  | -0.534488 | <b>TS10</b>                               |           |           |           |
| O | 3.071826  | -0.605141 | -0.597128 | SCF energy in Ethanol: -3455.888418 a.u.  |           |           |           |
| O | 5.311851  | -0.771000 | -1.305600 | Free energy in Ethanol: -3454.705164 a.u. |           |           |           |
| C | 3.206710  | -1.789570 | -1.437201 | P                                         | -0.257657 | 0.289988  | -0.441288 |
| C | 4.752877  | -2.070904 | -1.361888 | N                                         | -0.044935 | 0.966421  | -1.943446 |
| C | 2.743092  | -1.414510 | -2.852426 | C                                         | 1.051368  | 1.914180  | -2.162583 |
| H | 3.366624  | -0.619671 | -3.269281 | H                                         | 1.630691  | 1.619857  | -3.043131 |
| H | 2.774057  | -2.278677 | -3.525109 | H                                         | 0.659348  | 2.927603  | -2.308145 |
| H | 1.708551  | -1.058263 | -2.810393 | H                                         | 1.735904  | 1.925606  | -1.315915 |
| C | 2.335250  | -2.915498 | -0.888569 | C                                         | -0.909263 | 0.780758  | -3.110090 |
| H | 2.519333  | -3.845988 | -1.437685 | H                                         | -1.811473 | 0.232937  | -2.847537 |
| H | 2.532274  | -3.098117 | 0.170874  | H                                         | -1.195205 | 1.756973  | -3.517466 |
| H | 1.273088  | -2.679912 | -1.007211 | H                                         | -0.369557 | 0.226939  | -3.890195 |
| C | 5.152781  | -2.869950 | -0.103950 | O                                         | -1.212089 | -0.988806 | -0.946443 |
| H | 6.245171  | -2.858451 | -0.025660 | O                                         | -1.319425 | 1.197312  | 0.471671  |
| H | 4.746132  | -2.407937 | 0.797638  | C                                         | -2.179416 | -1.614945 | -0.161819 |
| H | 4.824774  | -3.915246 | -0.153761 | C                                         | -3.224246 | -0.847452 | 0.376593  |
| C | 5.315042  | -2.782365 | -2.599461 | C                                         | -2.151241 | -3.018912 | -0.019901 |
| H | 4.846420  | -3.762658 | -2.752365 | C                                         | -4.057246 | -1.415321 | 1.372726  |
| H | 5.177665  | -2.181204 | -3.501713 | C                                         | -3.518626 | 0.521506  | -0.158565 |
| H | 6.390682  | -2.939633 | -2.465036 | C                                         | -3.068061 | -3.563016 | 0.886333  |
| C | 4.440977  | 1.609478  | -1.219667 | C                                         | -3.954513 | -2.789699 | 1.643574  |
| C | 4.870807  | 1.816419  | -2.542989 | C                                         | -2.575902 | 1.547085  | -0.020440 |
| C | 3.996806  | 2.745558  | -0.518589 | C                                         | -4.750988 | 0.792761  | -0.806780 |
| C | 4.835687  | 3.077111  | -3.145173 | H                                         | -3.082836 | -4.642629 | 1.010272  |
| H | 5.256129  | 0.965714  | -3.099500 | C                                         | -2.871716 | 2.888946  | -0.319188 |
| C | 3.951497  | 4.013159  | -1.107508 | C                                         | -5.058460 | 2.121977  | -1.147714 |
| H | 3.680096  | 2.628022  | 0.514458  | C                                         | -4.138930 | 3.134275  | -0.857774 |
| C | 4.367972  | 4.182949  | -2.429819 | C                                         | -1.955748 | 4.040981  | -0.045894 |
| H | 5.179593  | 3.200837  | -4.170560 | C                                         | -1.488226 | 4.856635  | -1.100027 |
|   |           |           |           | C                                         | -1.650361 | 4.390807  | 1.291122  |
|   |           |           |           | C                                         | -0.693532 | 5.971241  | -0.803863 |

|   |           |           |           |    |           |           |           |
|---|-----------|-----------|-----------|----|-----------|-----------|-----------|
| C | -0.873698 | 5.525730  | 1.538612  | H  | -5.131419 | -4.444825 | 2.351350  |
| C | -0.370854 | 6.324436  | 0.506418  | H  | -5.925287 | -0.333442 | 1.523766  |
| H | -0.326708 | 6.584274  | -1.625156 | H  | -4.584666 | 0.432929  | 2.341620  |
| H | -0.663053 | 5.798341  | 2.570819  | H  | -4.697257 | -1.185857 | 4.187665  |
| C | -1.842369 | 4.603467  | -2.550899 | H  | -4.407925 | 4.163865  | -1.082102 |
| H | -2.732398 | 5.173976  | -2.849511 | C  | -6.386210 | 2.506698  | -1.784206 |
| H | -1.026308 | 4.919232  | -3.209771 | H  | -7.048834 | 2.904399  | -0.999983 |
| H | -2.059768 | 3.552236  | -2.748654 | H  | -6.227742 | 3.333391  | -2.487782 |
| C | 0.503521  | 7.520786  | 0.802201  | C  | -5.676877 | -0.338104 | -1.241117 |
| H | 0.219798  | 8.001473  | 1.744969  | C  | -7.092753 | 1.338596  | -2.479620 |
| H | 1.558760  | 7.229386  | 0.891918  | H  | -6.566831 | 1.085504  | -3.411061 |
| H | 0.441017  | 8.270418  | 0.006203  | H  | -8.111432 | 1.631991  | -2.760124 |
| C | -2.176058 | 3.590319  | 2.460757  | C  | -7.106873 | 0.116523  | -1.558248 |
| H | -3.250209 | 3.392926  | 2.366653  | H  | -5.242901 | -0.787440 | -2.148532 |
| H | -1.666361 | 2.623991  | 2.535043  | H  | -5.692813 | -1.143166 | -0.504093 |
| H | -2.011957 | 4.127813  | 3.399987  | H  | -7.632350 | 0.370500  | -0.626058 |
| C | -1.323828 | -3.946125 | -0.858741 | H  | -7.659725 | -0.712886 | -2.015558 |
| C | -0.469870 | -4.902642 | -0.264180 | Ni | 1.528842  | -0.153616 | 0.697046  |
| C | -1.507514 | -3.969381 | -2.264577 | C  | 2.960072  | -3.118652 | 4.005463  |
| C | 0.207049  | -5.820971 | -1.075806 | C  | 1.564638  | -3.217169 | 3.896506  |
| C | -0.808788 | -4.904451 | -3.032916 | C  | 0.829669  | -2.161318 | 3.375362  |
| C | 0.063203  | -5.835904 | -2.462983 | C  | 1.463933  | -0.960282 | 2.977558  |
| H | 0.869605  | -6.543431 | -0.602696 | C  | 2.867706  | -0.872983 | 3.101279  |
| H | -0.964091 | -4.914282 | -4.110175 | C  | 3.604412  | -1.953287 | 3.598432  |
| C | -2.477024 | -3.046234 | -2.968749 | H  | 3.533083  | -3.947518 | 4.412518  |
| H | -3.435924 | -2.985827 | -2.442017 | H  | 1.057348  | -4.121055 | 4.223603  |
| H | -2.081487 | -2.027997 | -3.040675 | H  | -0.252632 | -2.234302 | 3.297439  |
| H | -2.672154 | -3.400116 | -3.985897 | H  | 3.382929  | 0.035055  | 2.808366  |
| C | -0.253011 | -4.984786 | 1.230617  | H  | 4.684348  | -1.869026 | 3.676833  |
| H | -0.307897 | -4.005101 | 1.707312  | C  | 0.684506  | 0.164054  | 2.397938  |
| H | -0.999748 | -5.628048 | 1.715358  | H  | -0.388752 | -0.034125 | 2.458497  |
| H | 0.730819  | -5.410296 | 1.452070  | C  | 1.014737  | 1.522325  | 2.952494  |
| C | 0.831342  | -6.813104 | -3.321695 | H  | 0.645873  | 1.688321  | 3.970747  |
| H | 1.758242  | -6.363678 | -3.702706 | C  | 1.732148  | 2.494871  | 2.380455  |
| H | 1.112441  | -7.708519 | -2.757239 | H  | 2.111784  | 2.354690  | 1.369246  |
| H | 0.245402  | -7.130007 | -4.191684 | C  | 2.092080  | 3.796328  | 3.037582  |
| C | -4.787336 | -3.469500 | 2.719211  | H  | 1.730067  | 4.648862  | 2.449779  |
| C | -5.971965 | -2.625928 | 3.202155  | H  | 1.669147  | 3.869099  | 4.046113  |
| C | -5.514856 | -1.186480 | 3.452887  | B  | 4.451971  | 0.227496  | -0.497652 |
| C | -5.041726 | -0.543090 | 2.142640  | O  | 3.063787  | -0.555252 | -0.453595 |
| H | -6.325435 | -0.585263 | 3.881670  | O  | 5.286016  | -0.715916 | -1.224538 |
| H | -6.767192 | -2.626841 | 2.443017  | C  | 3.218436  | -1.816725 | -1.166449 |
| H | -6.400001 | -3.068524 | 4.109440  | C  | 4.777026  | -2.033951 | -1.139006 |
| H | -4.135561 | -3.688780 | 3.578896  | C  | 2.669468  | -1.618995 | -2.587772 |

|   |          |           |           |   |           |           |           |
|---|----------|-----------|-----------|---|-----------|-----------|-----------|
| H | 3.238579 | -0.856917 | -3.125556 | H | 1.759785  | 1.835739  | -1.468869 |
| H | 2.697835 | -2.551795 | -3.161534 | C | -0.969728 | 0.770668  | -3.189003 |
| H | 1.626051 | -1.292014 | -2.528907 | H | -1.846438 | 0.187140  | -2.916542 |
| C | 2.424705 | -2.913024 | -0.459208 | H | -1.297251 | 1.750957  | -3.555595 |
| H | 2.613983 | -3.885528 | -0.928190 | H | -0.441371 | 0.258356  | -4.004448 |
| H | 2.686382 | -2.985963 | 0.599347  | O | -1.203007 | -1.035129 | -1.031596 |
| H | 1.349113 | -2.727174 | -0.542706 | O | -1.362177 | 1.146062  | 0.385093  |
| C | 5.265242 | -2.700401 | 0.163909  | C | -2.172117 | -1.658554 | -0.249380 |
| H | 6.359378 | -2.652211 | 0.181976  | C | -3.260587 | -0.904431 | 0.212938  |
| H | 4.888263 | -2.167966 | 1.039075  | C | -2.095915 | -3.049176 | -0.033885 |
| H | 4.969360 | -3.754510 | 0.228929  | C | -4.133317 | -1.464063 | 1.179801  |
| C | 5.313017 | -2.832854 | -2.334248 | C | -3.533314 | 0.459810  | -0.342673 |
| H | 4.883546 | -3.841725 | -2.373841 | C | -3.040616 | -3.591019 | 0.843557  |
| H | 5.106544 | -2.324541 | -3.279376 | C | -4.002346 | -2.823573 | 1.508203  |
| H | 6.399841 | -2.931824 | -2.240372 | C | -2.609669 | 1.490335  | -0.130932 |
| C | 4.397297 | 1.645450  | -1.304445 | C | -4.728924 | 0.734730  | -1.053514 |
| C | 4.636179 | 1.715277  | -2.689241 | H | -3.015378 | -4.663327 | 1.020238  |
| C | 4.152913 | 2.867100  | -0.651123 | C | -2.920638 | 2.838225  | -0.383694 |
| C | 4.591509 | 2.922543  | -3.391115 | C | -5.031655 | 2.067809  | -1.383127 |
| H | 4.886900 | 0.798849  | -3.217334 | C | -4.153099 | 3.085201  | -0.996093 |
| C | 4.103074 | 4.084958  | -1.337272 | C | -2.067939 | 3.990911  | 0.047887  |
| H | 4.020575 | 2.860977  | 0.428244  | C | -1.491363 | 4.869037  | -0.892772 |
| C | 4.313655 | 4.115575  | -2.717193 | C | -1.944109 | 4.274320  | 1.430494  |
| H | 4.784672 | 2.937491  | -4.462330 | C | -0.769702 | 5.982105  | -0.439825 |
| H | 3.910669 | 5.009135  | -0.795245 | C | -1.231970 | 5.406010  | 1.835085  |
| H | 4.281190 | 5.058637  | -3.258574 | C | -0.625216 | 6.270854  | 0.916597  |
| O | 4.778949 | 0.422217  | 0.919618  | H | -0.318635 | 6.645705  | -1.175264 |
| H | 3.182328 | 3.904201  | 3.118967  | H | -1.156440 | 5.623658  | 2.898972  |
| C | 6.100840 | 0.831790  | 1.205982  | C | -1.655075 | 4.682574  | -2.386156 |
| H | 6.812398 | 0.040694  | 0.923355  | H | -2.518226 | 5.246679  | -2.764925 |
| H | 6.371062 | 1.721953  | 0.615421  | H | -0.773666 | 5.049362  | -2.922925 |
| C | 6.244429 | 1.150389  | 2.690288  | H | -1.815313 | 3.637415  | -2.656913 |
| H | 7.267052 | 1.473953  | 2.920113  | C | 0.165466  | 7.470544  | 1.384422  |
| H | 5.556604 | 1.952372  | 2.984326  | H | -0.320838 | 7.965034  | 2.233140  |
| H | 6.020490 | 0.270760  | 3.305770  | H | 1.172019  | 7.180770  | 1.714155  |

### IM13

SCF energy in Ethanol: -3455.897579 a.u.

Free energy in Ethanol: -3454.716286 a.u.

|   |           |          |           |   |           |           |           |
|---|-----------|----------|-----------|---|-----------|-----------|-----------|
| P | -0.264651 | 0.260100 | -0.533909 | H | -2.505051 | 3.855914  | 3.471834  |
| N | -0.071543 | 0.934677 | -2.045296 | C | -1.178233 | -3.980094 | -0.766036 |
| C | 1.062710  | 1.827329 | -2.306806 | C | -0.288530 | -4.820574 | -0.060374 |
| H | 1.614241  | 1.482206 | -3.188356 | C | -1.307854 | -4.129712 | -2.168383 |
| H | 0.714053  | 2.852151 | -2.481177 | C | 0.457218  | -5.773372 | -0.764090 |

|    |           |           |           |   |           |           |           |
|----|-----------|-----------|-----------|---|-----------|-----------|-----------|
| C  | -0.537563 | -5.091847 | -2.827976 | C | 0.235713  | -1.536952 | 3.647017  |
| C  | 0.354814  | -5.924656 | -2.147675 | C | 1.273946  | -0.810809 | 3.026935  |
| H  | 1.143781  | -6.410489 | -0.209496 | C | 2.594771  | -1.295543 | 3.153118  |
| H  | -0.651284 | -5.202994 | -3.904744 | C | 2.854328  | -2.462267 | 3.874575  |
| C  | -2.286636 | -3.308049 | -2.978114 | H | 2.027981  | -4.051890 | 5.078469  |
| H  | -3.275504 | -3.273802 | -2.506952 | H | -0.308767 | -3.215671 | 4.874479  |
| H  | -1.944626 | -2.273232 | -3.089181 | H | -0.786241 | -1.174749 | 3.560894  |
| H  | -2.404938 | -3.729648 | -3.981252 | H | 3.419019  | -0.764811 | 2.682484  |
| C  | -0.102601 | -4.721318 | 1.437415  | H | 3.876950  | -2.820941 | 3.956992  |
| H  | -0.169454 | -3.690766 | 1.792568  | C | 0.956951  | 0.429769  | 2.277281  |
| H  | -0.858391 | -5.300254 | 1.984783  | H | -0.089122 | 0.720009  | 2.358008  |
| H  | 0.876808  | -5.112606 | 1.729777  | C | 1.890091  | 1.568755  | 2.380573  |
| C  | 1.195349  | -6.937940 | -2.889323 | H | 2.936630  | 1.357603  | 2.587417  |
| H  | 2.140686  | -6.496082 | -3.232342 | C | 1.503652  | 2.856426  | 2.236303  |
| H  | 1.449345  | -7.792175 | -2.252503 | H | 0.459581  | 3.069940  | 2.011637  |
| H  | 0.675992  | -7.317699 | -3.776048 | C | 2.399016  | 4.045726  | 2.391884  |
| C  | -4.876102 | -3.493588 | 2.557472  | H | 2.044839  | 4.691493  | 3.208089  |
| C  | -6.113852 | -2.674949 | 2.938931  | H | 3.432359  | 3.757091  | 2.607486  |
| C  | -5.716852 | -1.213892 | 3.164560  | B | 4.576843  | 0.250550  | -0.408107 |
| C  | -5.187328 | -0.599712 | 1.862047  | O | 3.196514  | -0.510141 | -0.475174 |
| H  | -6.568814 | -0.625079 | 3.524985  | O | 5.473137  | -0.702693 | -1.045348 |
| H  | -6.861512 | -2.728021 | 2.134637  | C | 3.385333  | -1.757977 | -1.204636 |
| H  | -6.581517 | -3.100737 | 3.834644  | C | 4.929099  | -2.010009 | -1.032127 |
| H  | -4.270327 | -3.660309 | 3.461400  | C | 2.977873  | -1.508945 | -2.665181 |
| H  | -5.166014 | -4.492300 | 2.206164  | H | 3.608496  | -0.745765 | -3.127224 |
| H  | -6.039295 | -0.439274 | 1.186558  | H | 3.040879  | -2.427617 | -3.258784 |
| H  | -4.773474 | 0.396935  | 2.053344  | H | 1.938935  | -1.162737 | -2.693192 |
| H  | -4.943691 | -1.163051 | 3.944349  | C | 2.501386  | -2.846894 | -0.605948 |
| H  | -4.428488 | 4.118695  | -1.194449 | H | 2.719942  | -3.815361 | -1.069693 |
| C  | -6.319949 | 2.451291  | -2.096898 | H | 2.649438  | -2.941435 | 0.472613  |
| H  | -7.031477 | 2.839503  | -1.351706 | H | 1.444167  | -2.635685 | -0.792847 |
| H  | -6.123087 | 3.284775  | -2.782636 | C | 5.276015  | -2.705931 | 0.300756  |
| C  | -5.617840 | -0.397469 | -1.555182 | H | 6.363410  | -2.674921 | 0.427933  |
| C  | -6.976295 | 1.286230  | -2.845003 | H | 4.824273  | -2.181964 | 1.145575  |
| H  | -6.396737 | 1.049164  | -3.748477 | H | 4.959754  | -3.755801 | 0.317668  |
| H  | -7.979815 | 1.575663  | -3.179068 | C | 5.557407  | -2.805094 | -2.183956 |
| C  | -7.032208 | 0.051001  | -1.942737 | H | 5.106432  | -3.800415 | -2.282977 |
| H  | -5.131360 | -0.830152 | -2.443743 | H | 5.455944  | -2.276145 | -3.134829 |
| H  | -5.664545 | -1.213440 | -0.830968 | H | 6.627124  | -2.936577 | -1.988633 |
| H  | -7.609596 | 0.287678  | -1.037078 | C | 4.572440  | 1.655431  | -1.234412 |
| H  | -7.553096 | -0.775116 | -2.441569 | C | 5.009116  | 1.723240  | -2.569982 |
| Ni | 1.603098  | 0.008206  | 0.512281  | C | 4.148141  | 2.863099  | -0.652969 |
| C  | 1.817393  | -3.155781 | 4.500833  | C | 4.991941  | 2.916071  | -3.297409 |
| C  | 0.504747  | -2.685092 | 4.386218  | H | 5.391183  | 0.817717  | -3.034396 |



|   |          |           |           |   |           |          |           |
|---|----------|-----------|-----------|---|-----------|----------|-----------|
| C | 4.126111 | 4.066501  | -1.365388 | C | -1.404521 | 4.130141 | 0.303287  |
| H | 3.836811 | 2.855687  | 0.387481  | C | -0.582095 | 4.969081 | -0.479233 |
| C | 4.541971 | 4.095838  | -2.698265 | C | -1.337941 | 4.217492 | 1.716358  |
| H | 5.339548 | 2.929962  | -4.328853 | C | 0.334628  | 5.817443 | 0.157731  |
| H | 3.794762 | 4.982940  | -0.879582 | C | -0.415783 | 5.084176 | 2.306825  |
| H | 4.531299 | 5.028518  | -3.258256 | C | 0.446096  | 5.883237 | 1.546056  |
| O | 4.775921 | 0.441533  | 1.040054  | H | 0.975602  | 6.447111 | -0.456366 |
| H | 2.392196 | 4.662793  | 1.483125  | H | -0.378415 | 5.147402 | 3.392930  |
| C | 6.055178 | 0.898058  | 1.435173  | C | -0.671540 | 5.024394 | -1.990020 |
| H | 6.832798 | 0.225039  | 1.043881  | H | -1.415010 | 5.764268 | -2.316087 |
| H | 6.258912 | 1.895861  | 1.013054  | H | 0.287888  | 5.322408 | -2.425324 |
| C | 6.146861 | 0.959326  | 2.955997  | H | -0.964806 | 4.067194 | -2.425958 |
| H | 7.139737 | 1.303957  | 3.270162  | C | 1.456565  | 6.787293 | 2.213269  |
| H | 5.402048 | 1.651032  | 3.368681  | H | 1.005001  | 7.355432 | 3.035085  |
| H | 5.972285 | -0.028687 | 3.398061  | H | 2.287225  | 6.210442 | 2.641028  |

#### IM14

SCF energy in Ethanol: -3455.897942 a.u.

Free energy in Ethanol: -3454.713875 a.u.

|   |           |           |           |   |           |           |           |
|---|-----------|-----------|-----------|---|-----------|-----------|-----------|
| P | -0.110774 | 0.313155  | -0.355104 | H | -2.212644 | 3.783890  | 3.639932  |
| N | 0.279721  | 1.059867  | -1.790435 | C | -1.456245 | -3.771173 | -0.894610 |
| C | 1.478658  | 1.899172  | -1.856874 | C | -0.825009 | -4.699702 | -0.037454 |
| H | 2.109194  | 1.593399  | -2.697212 | C | -1.284691 | -3.890884 | -2.294172 |
| H | 1.208426  | 2.954705  | -1.972576 | C | -0.025016 | -5.706947 | -0.589740 |
| H | 2.071883  | 1.789700  | -0.949777 | C | -0.474528 | -4.912295 | -2.799624 |
| C | -0.504605 | 1.047442  | -3.024161 | C | 0.170974  | -5.830189 | -1.966627 |
| H | -1.372981 | 0.400160  | -2.924693 | H | 0.460239  | -6.414056 | 0.080910  |
| H | -0.845522 | 2.058886  | -3.278600 | H | -0.355964 | -4.999887 | -3.877978 |
| H | 0.121587  | 0.677498  | -3.846646 | C | -1.981422 | -2.967850 | -3.268726 |
| O | -1.090161 | -0.871634 | -1.018692 | H | -3.043925 | -2.849131 | -3.027657 |
| O | -1.239608 | 1.232915  | 0.492831  | H | -1.532812 | -1.968539 | -3.260777 |
| C | -2.275827 | -1.364582 | -0.482395 | H | -1.907520 | -3.357839 | -4.288703 |
| C | -3.335212 | -0.489288 | -0.191765 | C | -0.980801 | -4.641810 | 1.466649  |
| C | -2.416192 | -2.760433 | -0.344836 | H | -1.005935 | -3.616104 | 1.842012  |
| C | -4.453823 | -0.975764 | 0.535237  | H | -1.908014 | -5.125377 | 1.800803  |
| C | -3.318241 | 0.939387  | -0.646533 | H | -0.151786 | -5.161026 | 1.957791  |
| C | -3.586132 | -3.212685 | 0.270036  | C | 1.066114  | -6.906499 | -2.535693 |
| C | -4.568742 | -2.354624 | 0.773139  | H | 2.107306  | -6.563175 | -2.602607 |
| C | -2.320188 | 1.799496  | -0.174972 | H | 1.061222  | -7.805372 | -1.909497 |
| C | -4.319042 | 1.455533  | -1.508170 | H | 0.754927  | -7.194513 | -3.545715 |
| H | -3.725267 | -4.285837 | 0.375195  | C | -5.721078 | -2.954016 | 1.564445  |
| C | -2.385876 | 3.196011  | -0.332689 | C | -6.891055 | -1.987873 | 1.776608  |
| C | -4.384975 | 2.844998  | -1.718309 | C | -6.356802 | -0.616819 | 2.198094  |
| C | -3.455449 | 3.681964  | -1.090149 | C | -5.504406 | -0.011213 | 1.074990  |

|    |           |           |           |                                           |          |           |           |
|----|-----------|-----------|-----------|-------------------------------------------|----------|-----------|-----------|
| H  | -7.177311 | 0.068363  | 2.442732  | O                                         | 5.261391 | -1.464848 | -0.882819 |
| H  | -7.465096 | -1.881866 | 0.844994  | C                                         | 3.047841 | -2.090539 | -0.472402 |
| H  | -7.579335 | -2.393278 | 2.527838  | C                                         | 4.533476 | -2.602097 | -0.458169 |
| H  | -5.340403 | -3.270534 | 2.547699  | C                                         | 2.440576 | -2.099152 | -1.882316 |
| H  | -6.062862 | -3.872398 | 1.069742  | H                                         | 3.095941 | -1.586436 | -2.589852 |
| H  | -6.179498 | 0.307159  | 0.268774  | H                                         | 2.260385 | -3.119933 | -2.235233 |
| H  | -5.013471 | 0.904429  | 1.423658  | H                                         | 1.477712 | -1.581649 | -1.873666 |
| H  | -5.753148 | -0.725877 | 3.110785  | C                                         | 2.141189 | -2.856838 | 0.491413  |
| H  | -3.550435 | 4.757898  | -1.217660 | H                                         | 2.140645 | -3.924510 | 0.245924  |
| C  | -5.475813 | 3.479437  | -2.569893 | H                                         | 2.470223 | -2.745360 | 1.527738  |
| H  | -6.250842 | 3.884392  | -1.900776 | H                                         | 1.102879 | -2.519498 | 0.413079  |
| H  | -5.064695 | 4.343935  | -3.105931 | C                                         | 4.997218 | -3.041980 | 0.947501  |
| C  | -5.234114 | 0.520784  | -2.290713 | H                                         | 6.079834 | -3.203745 | 0.919895  |
| C  | -6.133393 | 2.504594  | -3.552291 | H                                         | 4.790683 | -2.266554 | 1.689042  |
| H  | -5.442091 | 2.284119  | -4.377949 | H                                         | 4.523231 | -3.978976 | 1.263003  |
| H  | -7.021547 | 2.967984  | -3.998412 | C                                         | 4.809800 | -3.743092 | -1.446245 |
| C  | -6.495400 | 1.201430  | -2.835396 | H                                         | 4.193221 | -4.624654 | -1.230083 |
| H  | -4.653115 | 0.130980  | -3.141765 | H                                         | 4.627349 | -3.429807 | -2.476947 |
| H  | -5.499422 | -0.359087 | -1.700886 | H                                         | 5.861740 | -4.038873 | -1.368573 |
| H  | -7.188321 | 1.420090  | -2.009659 | C                                         | 4.760301 | 0.944956  | -1.468865 |
| H  | -7.018078 | 0.514664  | -3.511996 | C                                         | 4.913765 | 0.642477  | -2.834681 |
| Ni | 1.636230  | 0.030927  | 0.987718  | C                                         | 4.710549 | 2.311517  | -1.137924 |
| C  | -1.344172 | -2.822621 | 4.715261  | C                                         | 4.981308 | 1.635576  | -3.816322 |
| C  | -2.071182 | -1.797157 | 4.104735  | H                                         | 5.007658 | -0.400870 | -3.124254 |
| C  | -1.411628 | -0.781514 | 3.416325  | C                                         | 4.771172 | 3.318544  | -2.106118 |
| C  | -0.006102 | -0.755691 | 3.319857  | H                                         | 4.632200 | 2.597651  | -0.091679 |
| C  | 0.708152  | -1.811511 | 3.920944  | C                                         | 4.901479 | 2.983156  | -3.455982 |
| C  | 0.048448  | -2.826416 | 4.613074  | H                                         | 5.107158 | 1.359733  | -4.861833 |
| H  | -1.856466 | -3.610364 | 5.260847  | H                                         | 4.729753 | 4.364651  | -1.807336 |
| H  | -3.156084 | -1.783328 | 4.171167  | H                                         | 4.957004 | 3.761172  | -4.214346 |
| H  | -1.986354 | 0.012267  | 2.948617  | O                                         | 5.233835 | 0.177796  | 0.950631  |
| H  | 1.791792  | -1.839806 | 3.860124  | H                                         | 4.687378 | 1.883449  | 2.033421  |
| H  | 0.626811  | -3.621573 | 5.076346  | C                                         | 6.617727 | 0.009516  | 1.205180  |
| C  | 0.661843  | 0.388382  | 2.649710  | H                                         | 6.730294 | -0.256235 | 2.267825  |
| H  | -0.000100 | 1.235280  | 2.485861  | H                                         | 7.006325 | -0.831873 | 0.618639  |
| C  | 2.027398  | 0.741118  | 3.005237  | C                                         | 7.454858 | 1.258320  | 0.913414  |
| H  | 2.623749  | 0.073103  | 3.623886  | H                                         | 8.507582 | 1.074886  | 1.166913  |
| C  | 2.625286  | 1.873858  | 2.526693  | H                                         | 7.397528 | 1.532639  | -0.144110 |
| H  | 2.017102  | 2.570522  | 1.948265  | H                                         | 7.110912 | 2.116117  | 1.504229  |
| C  | 4.030877  | 2.276724  | 2.822523  |                                           |          |           |           |
| H  | 4.128701  | 3.366781  | 2.868209  | <b>IM15</b>                               |          |           |           |
| H  | 4.377834  | 1.844619  | 3.767682  | SCF energy in Ethanol: -3455.910521 a.u.  |          |           |           |
| B  | 4.687676  | -0.240124 | -0.348373 | Free energy in Ethanol: -3454.723946 a.u. |          |           |           |
| O  | 3.186475  | -0.704571 | -0.034896 | P                                         | 0.002145 | 0.729310  | -0.597692 |

|   |           |           |           |   |           |           |           |
|---|-----------|-----------|-----------|---|-----------|-----------|-----------|
| N | 0.416905  | 1.752706  | -1.846714 | C | -1.193841 | -3.151361 | -1.930646 |
| C | 1.523373  | 2.698149  | -1.654995 | C | -0.316807 | -4.141310 | -1.434558 |
| H | 2.091123  | 2.778395  | -2.588612 | C | -1.333741 | -2.983695 | -3.328696 |
| H | 1.148177  | 3.690898  | -1.376215 | C | 0.404132  | -4.930641 | -2.339322 |
| H | 2.211240  | 2.344252  | -0.887967 | C | -0.592165 | -3.794820 | -4.192923 |
| C | -0.404450 | 2.037988  | -3.023813 | C | 0.281189  | -4.779009 | -3.721674 |
| H | -1.238578 | 1.342637  | -3.089718 | H | 1.081393  | -5.686030 | -1.945499 |
| H | -0.795897 | 3.061836  | -2.991252 | H | -0.709601 | -3.658649 | -5.266538 |
| H | 0.212950  | 1.934819  | -3.925907 | C | -2.284643 | -1.966916 | -3.920641 |
| O | -1.032304 | -0.244943 | -1.475326 | H | -3.282940 | -2.035941 | -3.473567 |
| O | -1.051116 | 1.494412  | 0.452175  | H | -1.928208 | -0.943310 | -3.758094 |
| C | -2.063128 | -0.970179 | -0.875077 | H | -2.386681 | -2.116908 | -5.000031 |
| C | -3.103465 | -0.274842 | -0.240128 | C | -0.121332 | -4.369724 | 0.046952  |
| C | -2.078842 | -2.371858 | -1.005589 | H | -0.002644 | -3.430918 | 0.594809  |
| C | -4.035244 | -0.997802 | 0.548465  | H | -0.970909 | -4.891938 | 0.502984  |
| C | -3.255664 | 1.205806  | -0.420449 | H | 0.768156  | -4.980901 | 0.228207  |
| C | -3.079752 | -3.048334 | -0.302915 | C | 1.042112  | -5.667986 | -4.678110 |
| C | -4.008289 | -2.402279 | 0.520109  | H | 1.957227  | -6.058737 | -4.220607 |
| C | -2.244203 | 2.065655  | 0.025374  | H | 0.437556  | -6.532083 | -4.985700 |
| C | -4.417699 | 1.759704  | -1.014542 | H | 1.322237  | -5.129642 | -5.590396 |
| H | -3.126243 | -4.130680 | -0.394887 | C | -4.955121 | -3.252261 | 1.352995  |
| C | -2.413715 | 3.460259  | 0.102674  | C | -6.131643 | -2.466725 | 1.941786  |
| C | -4.600075 | 3.154052  | -0.979679 | C | -5.628780 | -1.148203 | 2.535096  |
| C | -3.623867 | 3.961495  | -0.386039 | C | -5.035770 | -0.261458 | 1.432049  |
| C | -1.394717 | 4.376157  | 0.704869  | H | -6.439450 | -0.608914 | 3.039619  |
| C | -0.796049 | 5.401372  | -0.060590 | H | -6.869783 | -2.251310 | 1.155963  |
| C | -1.071777 | 4.259989  | 2.079921  | H | -6.643423 | -3.072373 | 2.699135  |
| C | 0.154279  | 6.239165  | 0.539257  | H | -4.381269 | -3.705583 | 2.175499  |
| C | -0.126620 | 5.125350  | 2.635821  | H | -5.316746 | -4.093005 | 0.746914  |
| C | 0.515034  | 6.112473  | 1.880121  | H | -5.863662 | 0.128974  | 0.823999  |
| H | 0.620270  | 7.015561  | -0.064941 | H | -4.553931 | 0.619448  | 1.871186  |
| H | 0.108545  | 5.031289  | 3.694269  | H | -4.865782 | -1.358028 | 3.298241  |
| C | -1.159290 | 5.670239  | -1.507073 | H | -3.799545 | 5.032914  | -0.322566 |
| H | -1.942107 | 6.437261  | -1.582176 | C | -5.858076 | 3.815995  | -1.523819 |
| H | -0.292332 | 6.045277  | -2.061602 | H | -6.527011 | 4.042916  | -0.679216 |
| H | -1.537292 | 4.782218  | -2.017270 | H | -5.599233 | 4.785724  | -1.966970 |
| C | 1.568148  | 7.002995  | 2.496816  | C | -5.397281 | 0.882288  | -1.784982 |
| H | 1.320135  | 7.260076  | 3.532778  | C | -6.619024 | 2.951992  | -2.535254 |
| H | 2.547256  | 6.505611  | 2.513443  | H | -6.071042 | 2.922402  | -3.487783 |
| H | 1.685391  | 7.935101  | 1.934152  | H | -7.597337 | 3.400159  | -2.746489 |
| C | -1.760176 | 3.255611  | 2.977552  | C | -6.772157 | 1.527346  | -1.996632 |
| H | -2.847970 | 3.277007  | 2.843809  | H | -4.949951 | 0.680852  | -2.771459 |
| H | -1.426387 | 2.233575  | 2.771475  | H | -5.504749 | -0.097723 | -1.315910 |
| H | -1.545388 | 3.470549  | 4.028922  | H | -7.322030 | 1.555113  | -1.044522 |

|    |           |           |           |                                           |           |           |           |
|----|-----------|-----------|-----------|-------------------------------------------|-----------|-----------|-----------|
| H  | -7.363317 | 0.910566  | -2.684311 | C                                         | 6.302399  | 1.588855  | -0.696022 |
| Ni | 1.730811  | -0.055763 | 0.518925  | C                                         | 4.581473  | 2.498948  | 0.697820  |
| C  | -0.484233 | -6.116033 | 4.752713  | C                                         | 6.983422  | 2.808639  | -0.664879 |
| C  | -1.635475 | -5.353772 | 4.547047  | H                                         | 6.730121  | 0.750019  | -1.239915 |
| C  | -1.543492 | -4.090510 | 3.964783  | C                                         | 5.247556  | 3.726718  | 0.732138  |
| C  | -0.302615 | -3.548827 | 3.576303  | H                                         | 3.657983  | 2.387786  | 1.263133  |
| C  | 0.847290  | -4.337537 | 3.784903  | C                                         | 6.454134  | 3.887137  | 0.046762  |
| C  | 0.756501  | -5.599226 | 4.366171  | H                                         | 7.929092  | 2.916944  | -1.192255 |
| H  | -0.551150 | -7.102345 | 5.203736  | H                                         | 4.830495  | 4.555761  | 1.300945  |
| H  | -2.607123 | -5.742737 | 4.841285  | H                                         | 6.979401  | 4.839166  | 0.074159  |
| H  | -2.443825 | -3.497929 | 3.816137  | O                                         | 3.572158  | -0.313338 | 1.210023  |
| H  | 1.819426  | -3.964018 | 3.476100  | C                                         | 4.241535  | -1.066784 | 2.224153  |
| H  | 1.658982  | -6.187164 | 4.513792  | H                                         | 3.589914  | -1.075407 | 3.100862  |
| C  | -0.265820 | -2.206576 | 2.984612  | H                                         | 4.365692  | -2.102236 | 1.882152  |
| H  | -1.239658 | -1.797971 | 2.710676  | C                                         | 5.596001  | -0.487316 | 2.623387  |
| C  | 0.823433  | -1.426909 | 2.793691  | H                                         | 6.007647  | -1.086505 | 3.445599  |
| H  | 1.790527  | -1.808861 | 3.112672  | H                                         | 6.303226  | -0.512651 | 1.791118  |
| C  | 0.779783  | -0.056797 | 2.239678  | H                                         | 5.499340  | 0.548927  | 2.961516  |
| H  | -0.263219 | 0.219366  | 2.084116  | H                                         | 1.341903  | 2.009733  | 2.661591  |
| C  | 1.446553  | 1.016872  | 3.113480  |                                           |           |           |           |
| H  | 0.965872  | 1.055600  | 4.103447  |                                           |           |           |           |
| H  | 2.513010  | 0.835541  | 3.270262  | <b>TS11</b>                               |           |           |           |
| B  | 4.293647  | -0.010678 | -0.115626 | SCF energy in Ethanol: -3455.882079 a.u.  |           |           |           |
| O  | 3.061484  | 0.007129  | -1.023156 | Free energy in Ethanol: -3454.700799 a.u. |           |           |           |
| O  | 5.104482  | -1.087451 | -0.617664 | P                                         | 0.421031  | 0.886552  | 0.538665  |
| C  | 3.348182  | -0.853036 | -2.163828 | N                                         | 0.418724  | 2.239155  | 1.515580  |
| C  | 4.378029  | -1.878143 | -1.558485 | C                                         | -0.427869 | 3.377411  | 1.148769  |
| C  | 3.970130  | 0.042440  | -3.248623 | H                                         | -0.939929 | 3.751820  | 2.043286  |
| H  | 4.902228  | 0.499097  | -2.908235 | H                                         | 0.172890  | 4.188081  | 0.715093  |
| H  | 4.167421  | -0.522122 | -4.166548 | H                                         | -1.196157 | 3.079002  | 0.433531  |
| H  | 3.267240  | 0.846215  | -3.489212 | C                                         | 1.328847  | 2.502264  | 2.628708  |
| C  | 2.066032  | -1.476485 | -2.700579 | H                                         | 1.982058  | 1.648999  | 2.801675  |
| H  | 2.296565  | -2.186176 | -3.502916 | H                                         | 1.944133  | 3.387215  | 2.427698  |
| H  | 1.508832  | -2.013089 | -1.931657 | H                                         | 0.746666  | 2.690527  | 3.541600  |
| H  | 1.412281  | -0.704474 | -3.116893 | O                                         | 1.115031  | -0.155739 | 1.654032  |
| C  | 3.695993  | -3.050339 | -0.828348 | O                                         | 1.643434  | 0.993922  | -0.601739 |
| H  | 4.460005  | -3.605026 | -0.272881 | C                                         | 1.799599  | -1.297979 | 1.236498  |
| H  | 2.945271  | -2.699946 | -0.113510 | C                                         | 3.016579  | -1.143180 | 0.557051  |
| H  | 3.208495  | -3.741455 | -1.524652 | C                                         | 1.285701  | -2.565004 | 1.566900  |
| C  | 5.375049  | -2.442362 | -2.577253 | C                                         | 3.633292  | -2.280526 | -0.024578 |
| H  | 4.863744  | -2.990827 | -3.377686 | C                                         | 3.650606  | 0.209477  | 0.434828  |
| H  | 5.980105  | -1.650050 | -3.024316 | C                                         | 1.986171  | -3.669289 | 1.074514  |
| H  | 6.055197  | -3.137125 | -2.072730 | C                                         | 3.106197  | -3.554980 | 0.244848  |
| C  | 5.081552  | 1.399852  | -0.025147 | C                                         | 2.965577  | 1.227007  | -0.244085 |
|    |           |           |           | C                                         | 4.939110  | 0.477195  | 0.959495  |

|   |           |           |           |    |           |           |           |
|---|-----------|-----------|-----------|----|-----------|-----------|-----------|
| H | 1.624542  | -4.662313 | 1.330308  | C  | 3.695202  | -4.823156 | -0.354546 |
| C | 3.579911  | 2.439991  | -0.606264 | C  | 5.074694  | -4.621413 | -0.989937 |
| C | 5.565629  | 1.695201  | 0.638544  | C  | 5.067466  | -3.351172 | -1.843833 |
| C | 4.895468  | 2.621027  | -0.168276 | C  | 4.825663  | -2.120279 | -0.960352 |
| C | 2.902964  | 3.479238  | -1.443986 | H  | 6.015270  | -3.232406 | -2.382448 |
| C | 2.687922  | 4.784473  | -0.948985 | H  | 5.840078  | -4.527073 | -0.206194 |
| C | 2.526447  | 3.173168  | -2.776070 | H  | 5.341648  | -5.500231 | -1.588922 |
| C | 2.049909  | 5.730851  | -1.763061 | H  | 3.001930  | -5.198002 | -1.122926 |
| C | 1.905849  | 4.153331  | -3.553253 | H  | 3.734864  | -5.604571 | 0.415522  |
| C | 1.640353  | 5.436257  | -3.062527 | H  | 5.740353  | -1.929540 | -0.381892 |
| H | 1.876197  | 6.729166  | -1.364997 | H  | 4.680591  | -1.229905 | -1.582198 |
| H | 1.625987  | 3.908213  | -4.576026 | H  | 4.277775  | -3.427615 | -2.604657 |
| C | 3.149773  | 5.234681  | 0.422280  | H  | 5.409426  | 3.537209  | -0.449945 |
| H | 4.128017  | 5.731605  | 0.366479  | C  | 6.978987  | 2.020648  | 1.100295  |
| H | 2.449497  | 5.960972  | 0.849513  | H  | 7.672513  | 1.832067  | 0.266150  |
| H | 3.256718  | 4.404210  | 1.122115  | H  | 7.056105  | 3.094040  | 1.314286  |
| C | 0.928829  | 6.461103  | -3.914724 | C  | 5.592142  | -0.478844 | 1.950518  |
| H | 1.312032  | 6.464464  | -4.941804 | C  | 7.432944  | 1.200259  | 2.312480  |
| H | -0.147108 | 6.249894  | -3.974082 | H  | 6.920156  | 1.556417  | 3.217272  |
| H | 1.043664  | 7.471066  | -3.507492 | H  | 8.507094  | 1.345238  | 2.479579  |
| C | 2.811168  | 1.823341  | -3.396221 | C  | 7.105499  | -0.279633 | 2.096593  |
| H | 3.828631  | 1.483049  | -3.172794 | H  | 5.120956  | -0.308042 | 2.931546  |
| H | 2.121860  | 1.058388  | -3.023833 | H  | 5.366209  | -1.518078 | 1.703613  |
| H | 2.701267  | 1.869917  | -4.484122 | H  | 7.618422  | -0.638003 | 1.192163  |
| C | 0.096112  | -2.780141 | 2.450460  | H  | 7.475720  | -0.887764 | 2.930876  |
| C | -1.060177 | -3.425903 | 1.950439  | Ni | -1.583728 | 0.389773  | -0.339868 |
| C | 0.162028  | -2.428425 | 3.817134  | C  | -1.663579 | -6.221705 | -4.441714 |
| C | -2.128140 | -3.675846 | 2.818920  | C  | -0.338484 | -5.920593 | -4.121695 |
| C | -0.931167 | -2.703294 | 4.648287  | C  | -0.012635 | -4.674519 | -3.588595 |
| C | -2.088865 | -3.320903 | 4.170991  | C  | -0.994880 | -3.689924 | -3.361631 |
| H | -3.014703 | -4.169826 | 2.425230  | C  | -2.329242 | -4.016918 | -3.681404 |
| H | -0.866582 | -2.437735 | 5.701876  | C  | -2.654470 | -5.260808 | -4.215523 |
| C | 1.394385  | -1.787622 | 4.416259  | H  | -1.923038 | -7.192060 | -4.856734 |
| H | 2.306566  | -2.327451 | 4.137732  | H  | 0.444029  | -6.657125 | -4.288470 |
| H | 1.514240  | -0.753729 | 4.073287  | H  | 1.024044  | -4.446060 | -3.348106 |
| H | 1.330035  | -1.773246 | 5.508906  | H  | -3.117443 | -3.293853 | -3.495790 |
| C | -1.176003 | -3.858631 | 0.505422  | H  | -3.691661 | -5.486163 | -4.452808 |
| H | -0.887084 | -3.065801 | -0.190459 | C  | -0.589006 | -2.392068 | -2.811918 |
| H | -0.539378 | -4.722991 | 0.283011  | H  | 0.449564  | -2.343548 | -2.478469 |
| H | -2.204744 | -4.146272 | 0.268978  | C  | -1.339003 | -1.272375 | -2.695595 |
| C | -3.264848 | -3.596284 | 5.079556  | H  | -2.366648 | -1.281568 | -3.054606 |
| H | -4.110544 | -2.934551 | 4.850610  | C  | -0.837736 | 0.001406  | -2.134341 |
| H | -3.625235 | -4.625809 | 4.967739  | H  | 0.239163  | -0.106370 | -1.983617 |
| H | -3.002061 | -3.443930 | 6.131473  | C  | -1.071675 | 1.220885  | -3.039962 |

|   |           |           |           |             |           |           |                                           |
|---|-----------|-----------|-----------|-------------|-----------|-----------|-------------------------------------------|
| H | -0.541571 | 1.095669  | -3.997335 | <b>IM16</b> |           |           |                                           |
| H | -2.128946 | 1.368642  | -3.274543 |             |           |           | SCF energy in Ethanol: -2889.880718 a.u.  |
| H | -0.695737 | 2.142688  | -2.581139 |             |           |           | Free energy in Ethanol: -2888.942110 a.u. |
| B | -3.692757 | 1.314486  | 0.704522  | P           | -0.009337 | 0.977095  | 0.977479                                  |
| O | -3.732289 | 2.579040  | 0.072388  | N           | 0.468403  | 2.006860  | 2.208263                                  |
| O | -4.882026 | 1.084412  | 1.418185  | C           | 0.096863  | 3.419741  | 2.137782                                  |
| C | -4.886556 | 3.295891  | 0.557257  | H           | -0.327034 | 3.741441  | 3.097948                                  |
| C | -5.817250 | 2.144519  | 1.136815  | H           | 0.968048  | 4.047689  | 1.906360                                  |
| C | -5.494256 | 4.083319  | -0.606447 | H           | -0.658415 | 3.571035  | 1.360494                                  |
| H | -5.755036 | 3.430171  | -1.442136 | C           | 1.359207  | 1.674515  | 3.319328                                  |
| H | -6.395085 | 4.623086  | -0.291007 | H           | 1.688596  | 0.639281  | 3.247765                                  |
| H | -4.768287 | 4.819902  | -0.967634 | H           | 2.236989  | 2.331515  | 3.319742                                  |
| C | -4.392426 | 4.281856  | 1.630238  | H           | 0.828905  | 1.808549  | 4.272171                                  |
| H | -5.204397 | 4.903038  | 2.024480  | O           | 0.185237  | -0.435003 | 1.842912                                  |
| H | -3.917815 | 3.758100  | 2.465427  | O           | 1.199146  | 0.786828  | -0.179734                                 |
| H | -3.644493 | 4.943361  | 1.180384  | C           | 0.211387  | -1.636695 | 1.132635                                  |
| C | -6.528723 | 2.501181  | 2.446685  | C           | 1.368598  | -1.955128 | 0.412034                                  |
| H | -7.105505 | 1.636976  | 2.792643  | C           | -0.904193 | -2.485606 | 1.197297                                  |
| H | -5.821743 | 2.769612  | 3.235267  | C           | 1.358365  | -3.098251 | -0.427791                                 |
| H | -7.224734 | 3.336259  | 2.303860  | C           | 2.570378  | -1.064210 | 0.510376                                  |
| C | -6.859421 | 1.619757  | 0.137454  | C           | -0.838262 | -3.654798 | 0.437182                                  |
| H | -7.634674 | 2.367422  | -0.065239 | C           | 0.242898  | -3.954705 | -0.400046                                 |
| H | -6.402315 | 1.320781  | -0.807164 | C           | 2.459614  | 0.281937  | 0.122552                                  |
| H | -7.340937 | 0.735514  | 0.567807  | C           | 3.820814  | -1.544534 | 0.972209                                  |
| C | -3.545106 | -0.036666 | -0.832198 | H           | -1.678785 | -4.344094 | 0.474478                                  |
| C | -3.858865 | -1.350936 | -0.415197 | C           | 3.580315  | 1.122067  | -0.008569                                 |
| C | -4.218203 | 0.425908  | -1.984762 | C           | 4.954132  | -0.717525 | 0.866029                                  |
| C | -4.771863 | -2.156322 | -1.101920 | C           | 4.816628  | 0.572643  | 0.343762                                  |
| H | -3.384862 | -1.758434 | 0.475589  | C           | 3.483824  | 2.524844  | -0.522153                                 |
| C | -5.129043 | -0.364376 | -2.685241 | C           | 3.841056  | 3.621082  | 0.292012                                  |
| H | -4.042403 | 1.446030  | -2.314849 | C           | 3.080595  | 2.758526  | -1.860606                                 |
| C | -5.406492 | -1.664029 | -2.244099 | C           | 3.729742  | 4.921754  | -0.220481                                 |
| H | -4.989080 | -3.162325 | -0.749858 | C           | 2.996429  | 4.070266  | -2.330928                                 |
| H | -5.631070 | 0.027998  | -3.567231 | C           | 3.300823  | 5.171831  | -1.522970                                 |
| H | -6.121414 | -2.282282 | -2.782299 | H           | 3.995949  | 5.760230  | 0.420964                                  |
| O | -2.465916 | 0.945628  | 1.384198  | H           | 2.691058  | 4.236932  | -3.362318                                 |
| C | -2.506523 | 0.145436  | 2.588513  | C           | 4.382547  | 3.459453  | 1.697857                                  |
| H | -1.597970 | -0.458816 | 2.595858  | H           | 5.481079  | 3.471503  | 1.701439                                  |
| H | -3.370074 | -0.523189 | 2.551310  | H           | 4.055374  | 4.286062  | 2.338599                                  |
| C | -2.569373 | 1.033884  | 3.821790  | H           | 4.075358  | 2.519243  | 2.158983                                  |
| H | -1.718070 | 1.722537  | 3.845015  | C           | 3.167250  | 6.580974  | -2.051808                                 |
| H | -3.495914 | 1.614896  | 3.834782  | H           | 3.625723  | 6.682272  | -3.042670                                 |
| H | -2.535544 | 0.412540  | 4.724817  | H           | 2.112965  | 6.869335  | -2.155701                                 |
|   |           |           |           | H           | 3.643349  | 7.306541  | -1.384256                                 |

|   |           |           |           |                                           |           |           |           |
|---|-----------|-----------|-----------|-------------------------------------------|-----------|-----------|-----------|
| C | 2.774931  | 1.619646  | -2.807466 | C                                         | 5.346186  | -3.456215 | 1.728322  |
| H | 3.544190  | 0.840416  | -2.761428 | H                                         | 3.584926  | -2.725639 | 2.727543  |
| H | 1.817529  | 1.145294  | -2.567365 | H                                         | 3.228204  | -3.613627 | 1.273599  |
| H | 2.718796  | 1.980453  | -3.839212 | H                                         | 5.638835  | -3.793194 | 0.723182  |
| C | -2.100291 | -2.168053 | 2.038153  | H                                         | 5.369354  | -4.340027 | 2.377395  |
| C | -3.340297 | -1.870917 | 1.427806  | Ni                                        | -2.011404 | 1.626591  | 0.094368  |
| C | -2.000822 | -2.191501 | 3.446243  | C                                         | -2.637351 | -3.113756 | -5.412252 |
| C | -4.441199 | -1.570638 | 2.237360  | C                                         | -1.284577 | -2.939330 | -5.112459 |
| C | -3.132068 | -1.897593 | 4.215040  | C                                         | -0.877264 | -1.880738 | -4.302285 |
| C | -4.358966 | -1.571524 | 3.632639  | C                                         | -1.804437 | -0.961952 | -3.770012 |
| H | -5.386932 | -1.322144 | 1.760303  | C                                         | -3.166215 | -1.158682 | -4.080826 |
| H | -3.049713 | -1.925682 | 5.300101  | C                                         | -3.573574 | -2.215599 | -4.889905 |
| C | -0.705028 | -2.542791 | 4.143173  | H                                         | -2.959674 | -3.938254 | -6.042401 |
| H | -0.251783 | -3.448979 | 3.725266  | H                                         | -0.543632 | -3.626213 | -5.514400 |
| H | 0.032833  | -1.737960 | 4.043257  | H                                         | 0.179383  | -1.747132 | -4.081004 |
| H | -0.873379 | -2.710523 | 5.211820  | H                                         | -3.913390 | -0.481761 | -3.676861 |
| C | -3.514877 | -1.874634 | -0.075873 | H                                         | -4.630303 | -2.343602 | -5.111376 |
| H | -2.733134 | -1.302405 | -0.586442 | C                                         | -1.315467 | 0.137436  | -2.935358 |
| H | -3.483621 | -2.890260 | -0.488812 | H                                         | -0.269157 | 0.063401  | -2.639953 |
| H | -4.479800 | -1.437346 | -0.347053 | C                                         | -2.014606 | 1.221903  | -2.516309 |
| C | -5.559267 | -1.216324 | 4.479349  | H                                         | -3.053538 | 1.335595  | -2.824560 |
| H | -5.740089 | -0.133366 | 4.475477  | C                                         | -1.486510 | 2.294042  | -1.662565 |
| H | -6.471455 | -1.694713 | 4.104089  | H                                         | -0.393856 | 2.245138  | -1.593386 |
| H | -5.420090 | -1.523930 | 5.521122  | C                                         | -1.939128 | 3.706660  | -2.018639 |
| C | 0.142453  | -5.184353 | -1.290282 | H                                         | -1.468924 | 4.028572  | -2.961536 |
| C | 1.470083  | -5.583820 | -1.941595 | H                                         | -3.023887 | 3.766708  | -2.142303 |
| C | 2.152938  | -4.339110 | -2.513881 | C                                         | -3.767786 | 2.302167  | 0.086527  |
| C | 2.515062  | -3.367624 | -1.382929 | C                                         | -4.867698 | 1.687753  | -0.546737 |
| H | 3.059878  | -4.605165 | -3.070209 | C                                         | -4.060055 | 3.346419  | 0.990939  |
| H | 2.130653  | -6.051017 | -1.197094 | C                                         | -6.184287 | 2.070892  | -0.274645 |
| H | 1.292154  | -6.332779 | -2.722552 | H                                         | -4.699273 | 0.886836  | -1.263859 |
| H | -0.591473 | -4.975935 | -2.083143 | C                                         | -5.374721 | 3.735519  | 1.270677  |
| H | -0.270537 | -6.020086 | -0.710528 | H                                         | -3.249588 | 3.875912  | 1.491000  |
| H | 3.370164  | -3.787000 | -0.834995 | C                                         | -6.442748 | 3.097480  | 0.637235  |
| H | 2.870963  | -2.417526 | -1.797601 | H                                         | -7.010158 | 1.569823  | -0.776446 |
| H | 1.473034  | -3.849539 | -3.224931 | H                                         | -5.563313 | 4.541887  | 1.976978  |
| H | 5.705262  | 1.189743  | 0.230536  | H                                         | -7.465791 | 3.401918  | 0.845473  |
| C | 6.344028  | -1.201401 | 1.254984  | H                                         | -1.653499 | 4.429022  | -1.246340 |
| H | 6.881251  | -1.490821 | 0.338362  |                                           |           |           |           |
| H | 6.915499  | -0.368629 | 1.683724  |                                           |           |           |           |
| C | 3.924388  | -2.884210 | 1.691581  | <b>IM17</b>                               |           |           |           |
| C | 6.335847  | -2.394783 | 2.216498  | SCF energy in Ethanol: -2889.911779 a.u.  |           |           |           |
| H | 6.041985  | -2.062160 | 3.222167  | Free energy in Ethanol: -2888.966753 a.u. |           |           |           |
| H | 7.347288  | -2.809737 | 2.303365  | P                                         | -0.237329 | -1.004497 | -0.389732 |
|   |           |           |           | N                                         | 0.084364  | -1.855848 | -1.799700 |

|   |           |           |           |   |           |           |           |
|---|-----------|-----------|-----------|---|-----------|-----------|-----------|
| C | 0.168244  | -3.313939 | -1.712142 | C | -4.179340 | 1.655226  | 0.257342  |
| H | -0.687458 | -3.787879 | -2.206966 | C | -3.432710 | 2.109017  | -2.020462 |
| H | 1.100230  | -3.661845 | -2.172349 | C | -5.460793 | 1.397999  | -0.238607 |
| H | 0.170636  | -3.634646 | -0.667079 | C | -4.730059 | 1.841086  | -2.472414 |
| C | -0.085252 | -1.349995 | -3.160942 | C | -5.758869 | 1.476785  | -1.601399 |
| H | 0.051472  | -0.270570 | -3.190160 | H | -6.246087 | 1.119054  | 0.461261  |
| H | 0.664071  | -1.814189 | -3.813056 | H | -4.941049 | 1.928201  | -3.536619 |
| H | -1.085249 | -1.595191 | -3.546825 | C | -2.377903 | 2.521169  | -3.023200 |
| O | -0.735206 | 0.417067  | -1.119877 | H | -1.850827 | 3.428780  | -2.707656 |
| O | 1.242596  | -0.554131 | 0.260620  | H | -1.622312 | 1.737676  | -3.152771 |
| C | -0.617147 | 1.636469  | -0.455448 | H | -2.829729 | 2.714072  | -4.001372 |
| C | 0.666105  | 2.138444  | -0.195743 | C | -3.930003 | 1.512211  | 1.741990  |
| C | -1.778756 | 2.367130  | -0.145507 | H | -3.175179 | 0.741598  | 1.934459  |
| C | 0.807832  | 3.278854  | 0.633492  | H | -3.568132 | 2.439109  | 2.199820  |
| C | 1.864067  | 1.486881  | -0.818106 | H | -4.847639 | 1.218015  | 2.261260  |
| C | -1.595889 | 3.548197  | 0.579557  | C | -7.142914 | 1.153464  | -2.113636 |
| C | -0.342971 | 3.983542  | 1.025810  | H | -7.316582 | 1.588683  | -3.103549 |
| C | 2.162812  | 0.152108  | -0.508906 | H | -7.286479 | 0.068252  | -2.201457 |
| C | 2.696899  | 2.194547  | -1.720362 | H | -7.919825 | 1.527723  | -1.437305 |
| H | -2.473584 | 4.146420  | 0.815017  | C | -0.277247 | 5.206382  | 1.927768  |
| C | 3.355424  | -0.464970 | -0.927269 | C | 1.132710  | 5.789475  | 2.070581  |
| C | 3.892293  | 1.595553  | -2.155937 | C | 2.135070  | 4.660222  | 2.320555  |
| C | 4.209667  | 0.304852  | -1.722092 | C | 2.187002  | 3.714533  | 1.113605  |
| C | 3.744688  | -1.858800 | -0.545220 | H | 3.137995  | 5.060148  | 2.513336  |
| C | 3.874428  | -2.863997 | -1.527906 | H | 1.411078  | 6.327684  | 1.152977  |
| C | 4.061530  | -2.157080 | 0.800181  | H | 1.151694  | 6.523390  | 2.885313  |
| C | 4.256798  | -4.154792 | -1.140167 | H | -0.644552 | 4.924541  | 2.926720  |
| C | 4.446042  | -3.456816 | 1.140259  | H | -0.975684 | 5.969011  | 1.559136  |
| C | 4.536139  | -4.477642 | 0.188473  | H | 2.728184  | 4.220597  | 0.302118  |
| H | 4.342378  | -4.926224 | -1.903510 | H | 2.780436  | 2.825851  | 1.355266  |
| H | 4.693888  | -3.674375 | 2.177786  | H | 1.838636  | 4.097608  | 3.216143  |
| C | 3.643210  | -2.590085 | -2.999312 | H | 5.152147  | -0.136147 | -2.039085 |
| H | 4.537484  | -2.165804 | -3.474655 | C | 4.877851  | 2.323942  | -3.058684 |
| H | 3.406063  | -3.516379 | -3.533565 | H | 5.692436  | 2.726030  | -2.436292 |
| H | 2.830995  | -1.877818 | -3.161535 | H | 5.351002  | 1.605100  | -3.739432 |
| C | 4.915778  | -5.884279 | 0.590037  | C | 2.253525  | 3.526093  | -2.315493 |
| H | 5.675959  | -5.884841 | 1.379478  | C | 4.249469  | 3.476093  | -3.849929 |
| H | 4.048831  | -6.436473 | 0.977492  | H | 3.613648  | 3.074701  | -4.651847 |
| H | 5.309789  | -6.451786 | -0.259741 | H | 5.035077  | 4.068438  | -4.334519 |
| C | 4.035823  | -1.086490 | 1.865890  | C | 3.399587  | 4.345882  | -2.920327 |
| H | 4.615326  | -0.206793 | 1.561197  | H | 1.524665  | 3.303167  | -3.111009 |
| H | 3.017336  | -0.745626 | 2.075942  | H | 1.704098  | 4.123490  | -1.585690 |
| H | 4.462072  | -1.462265 | 2.801729  | H | 4.034521  | 4.747733  | -2.117249 |
| C | -3.146188 | 2.006022  | -0.640538 | H | 2.988067  | 5.208188  | -3.458927 |



|                                           |           |           |           |   |           |           |           |
|-------------------------------------------|-----------|-----------|-----------|---|-----------|-----------|-----------|
| Ni                                        | -1.613275 | -1.913211 | 1.055138  | C | 1.663746  | -1.664644 | -3.123794 |
| C                                         | 1.468970  | 1.443976  | 5.058252  | H | 1.651587  | -0.576145 | -3.112180 |
| C                                         | 2.013964  | 0.163911  | 4.944219  | H | 2.698031  | -2.006507 | -3.250670 |
| C                                         | 1.330156  | -0.830417 | 4.245117  | H | 1.079610  | -2.011339 | -3.989109 |
| C                                         | 0.086192  | -0.576600 | 3.639264  | O | -0.228281 | -0.104771 | -1.773965 |
| C                                         | -0.439123 | 0.724405  | 3.747625  | O | 1.298844  | -0.460550 | 0.251292  |
| C                                         | 0.238709  | 1.716350  | 4.453030  | C | -0.682667 | 1.092001  | -1.230332 |
| H                                         | 1.993969  | 2.218670  | 5.610700  | C | 0.259101  | 1.970303  | -0.678430 |
| H                                         | 2.969988  | -0.065821 | 5.407974  | C | -2.052255 | 1.397356  | -1.292335 |
| H                                         | 1.753856  | -1.829830 | 4.180501  | C | -0.195294 | 3.116738  | 0.021999  |
| H                                         | -1.381599 | 0.967374  | 3.267339  | C | 1.719066  | 1.655985  | -0.801426 |
| H                                         | -0.196889 | 2.709547  | 4.529637  | C | -2.453939 | 2.584039  | -0.675472 |
| C                                         | -0.643704 | -1.689861 | 2.998655  | C | -1.568840 | 3.417587  | 0.018034  |
| H                                         | -0.056759 | -2.602473 | 2.874655  | C | 2.204895  | 0.462421  | -0.243102 |
| C                                         | -2.038514 | -1.826008 | 3.079245  | C | 2.625090  | 2.531684  | -1.449647 |
| H                                         | -2.620225 | -0.976358 | 3.438274  | H | -3.507309 | 2.852634  | -0.711731 |
| C                                         | -2.732541 | -2.884538 | 2.457500  | C | 3.582532  | 0.199487  | -0.122426 |
| H                                         | -2.205043 | -3.838811 | 2.368658  | C | 4.005523  | 2.271982  | -1.369214 |
| C                                         | -4.237363 | -2.987420 | 2.510983  | C | 4.453061  | 1.141995  | -0.675662 |
| H                                         | -4.563514 | -3.524076 | 3.413866  | C | 4.106837  | -1.001449 | 0.601286  |
| H                                         | -4.703021 | -1.995487 | 2.524044  | C | 4.835685  | -2.001048 | -0.075245 |
| C                                         | -2.753961 | -2.618158 | -0.342280 | C | 3.911526  | -1.113452 | 2.000284  |
| C                                         | -2.930566 | -4.005759 | -0.527128 | C | 5.303589  | -3.112772 | 0.640541  |
| C                                         | -3.439579 | -1.778474 | -1.241872 | C | 4.401834  | -2.233705 | 2.673760  |
| C                                         | -3.734028 | -4.526585 | -1.547161 | C | 5.091203  | -3.256194 | 2.010704  |
| H                                         | -2.433182 | -4.710502 | 0.138961  | H | 5.854778  | -3.884001 | 0.105070  |
| C                                         | -4.250291 | -2.290040 | -2.263149 | H | 4.250692  | -2.305979 | 3.749446  |
| H                                         | -3.340354 | -0.700334 | -1.160994 | C | 5.169350  | -1.908485 | -1.549387 |
| C                                         | -4.401653 | -3.668057 | -2.423479 | H | 6.141462  | -1.421424 | -1.706461 |
| H                                         | -3.840567 | -5.604950 | -1.652957 | H | 5.238105  | -2.906490 | -1.996495 |
| H                                         | -4.761139 | -1.601366 | -2.933639 | H | 4.431278  | -1.328592 | -2.106357 |
| H                                         | -5.030593 | -4.067648 | -3.215675 | C | 5.585669  | -4.470606 | 2.762075  |
| H                                         | -4.624566 | -3.527616 | 1.642814  | H | 6.105739  | -4.186830 | 3.684828  |
|                                           |           |           |           | H | 4.754886  | -5.127386 | 3.052273  |
|                                           |           |           |           | H | 6.277290  | -5.063313 | 2.154492  |
| <b>TS1c</b>                               |           |           |           | C | 3.223230  | -0.020867 | 2.788514  |
| SCF energy in Ethanol: -2812.627563 a.u.  |           |           |           | H | 3.691708  | 0.954746  | 2.611537  |
| Free energy in Ethanol: -2811.712928 a.u. |           |           |           | H | 2.168829  | 0.075294  | 2.508277  |
| P                                         | 0.233399  | -1.341068 | -0.737002 | H | 3.272122  | -0.228797 | 3.862129  |
| N                                         | 1.107986  | -2.200472 | -1.884033 | C | -3.046549 | 0.537158  | -2.007421 |
| C                                         | 1.251820  | -3.644475 | -1.737401 | C | -4.064938 | -0.126609 | -1.290577 |
| H                                         | 0.856237  | -4.161558 | -2.623317 | C | -3.003903 | 0.438157  | -3.417197 |
| H                                         | 2.306574  | -3.925607 | -1.610561 | C | -5.007347 | -0.886921 | -1.994616 |
| H                                         | 0.692191  | -3.990540 | -0.863310 | C | -3.970005 | -0.325782 | -4.077413 |

|    |           |           |           |                                           |           |           |           |
|----|-----------|-----------|-----------|-------------------------------------------|-----------|-----------|-----------|
| C  | -4.978421 | -1.003591 | -3.385351 | C                                         | -2.132053 | 0.646902  | 4.025530  |
| H  | -5.782909 | -1.403662 | -1.432764 | C                                         | -3.511876 | 0.362546  | 4.082226  |
| H  | -3.936269 | -0.388192 | -5.163854 | C                                         | -4.406518 | 1.273461  | 4.635945  |
| C  | -1.949980 | 1.157639  | -4.229416 | H                                         | -4.655330 | 3.201599  | 5.579132  |
| H  | -1.876821 | 2.215838  | -3.952850 | H                                         | -2.223119 | 3.736117  | 5.496983  |
| H  | -0.958778 | 0.715446  | -4.075916 | H                                         | -0.632645 | 2.118544  | 4.512749  |
| H  | -2.180419 | 1.102524  | -5.298315 | H                                         | -3.887556 | -0.572014 | 3.676774  |
| C  | -4.176814 | -0.038946 | 0.215735  | H                                         | -5.466210 | 1.033274  | 4.664980  |
| H  | -3.197344 | -0.080704 | 0.700142  | C                                         | -1.145332 | -0.268118 | 3.451551  |
| H  | -4.655403 | 0.896281  | 0.534808  | H                                         | -0.136226 | 0.135471  | 3.369541  |
| H  | -4.772238 | -0.871584 | 0.600144  | C                                         | -1.347888 | -1.538817 | 3.029399  |
| C  | -5.990311 | -1.852950 | -4.120097 | H                                         | -2.332556 | -1.997194 | 3.103766  |
| H  | -5.620540 | -2.877006 | -4.266893 | C                                         | -0.299534 | -2.366441 | 2.455311  |
| H  | -6.931963 | -1.925186 | -3.565068 | H                                         | 0.694117  | -1.930393 | 2.392729  |
| H  | -6.212227 | -1.444714 | -5.112558 | C                                         | -0.484234 | -3.681433 | 2.093169  |
| C  | -2.143517 | 4.600718  | 0.782877  | H                                         | -1.414897 | -4.198426 | 2.310335  |
| C  | -1.085734 | 5.603899  | 1.253777  | H                                         | 0.363405  | -4.296252 | 1.802540  |
| C  | 0.095415  | 4.851071  | 1.871444  | C                                         | -3.113869 | -4.674976 | -1.675233 |
| C  | 0.781513  | 3.981297  | 0.810284  | H                                         | -3.830808 | -3.977964 | -2.123064 |
| H  | 0.826132  | 5.546806  | 2.301965  | H                                         | -2.119374 | -4.440848 | -2.074498 |
| H  | -0.729535 | 6.204737  | 0.404504  | H                                         | -3.375614 | -5.694922 | -1.985111 |
| H  | -1.529143 | 6.303564  | 1.972620  | C                                         | -3.133271 | -4.550182 | -0.150948 |
| H  | -2.679369 | 4.214204  | 1.662864  | H                                         | -4.127583 | -4.846960 | 0.217697  |
| H  | -2.901471 | 5.100340  | 0.165409  | H                                         | -2.408170 | -5.261739 | 0.282812  |
| H  | 1.334717  | 4.644920  | 0.130836  | O                                         | -2.913731 | -3.235715 | 0.323104  |
| H  | 1.539307  | 3.340657  | 1.275224  | H                                         | -2.156564 | -2.488593 | -0.642468 |
| H  | -0.269364 | 4.219853  | 2.694025  |                                           |           |           |           |
| H  | 5.523985  | 0.974465  | -0.581261 |                                           |           |           |           |
| C  | 5.038826  | 3.213746  | -1.970922 | <b>TS1d</b>                               |           |           |           |
| H  | 5.450283  | 3.843410  | -1.166564 | SCF energy in Ethanol: -2812.626006 a.u.  |           |           |           |
| H  | 5.885981  | 2.631426  | -2.354789 | Free energy in Ethanol: -2811.712475 a.u. |           |           |           |
| C  | 2.114719  | 3.666674  | -2.329520 | P                                         | 0.121844  | -0.486450 | -0.495474 |
| C  | 4.476631  | 4.124456  | -3.067930 | N                                         | 0.808204  | -0.101012 | -1.978446 |
| H  | 4.296133  | 3.540191  | -3.981469 | C                                         | 2.146137  | -0.592994 | -2.295068 |
| H  | 5.212766  | 4.895652  | -3.325543 | H                                         | 2.106302  | -1.336182 | -3.105082 |
| C  | 3.159974  | 4.753904  | -2.604871 | H                                         | 2.794849  | 0.234048  | -2.612708 |
| H  | 1.809424  | 3.223624  | -3.290784 | H                                         | 2.595853  | -1.064441 | -1.418183 |
| H  | 1.204242  | 4.107137  | -1.918507 | C                                         | 0.087448  | 0.441927  | -3.127925 |
| H  | 3.337664  | 5.341237  | -1.692087 | H                                         | -0.844046 | 0.911139  | -2.815838 |
| H  | 2.774117  | 5.451167  | -3.358615 | H                                         | 0.709157  | 1.192014  | -3.631763 |
| Ni | -1.107296 | -2.490836 | 0.413011  | H                                         | -0.147211 | -0.351775 | -3.852706 |
| C  | -3.952695 | 2.493399  | 5.148461  | O                                         | -1.447279 | -0.648576 | -1.061417 |
| C  | -2.589787 | 2.793104  | 5.099751  | O                                         | -0.079896 | 0.935812  | 0.415395  |
| C  | -1.693748 | 1.881208  | 4.544068  | C                                         | -2.515143 | -0.555217 | -0.176403 |
|    |           |           |           | C                                         | -2.875627 | 0.712459  | 0.297392  |

|   |           |           |           |    |           |           |           |
|---|-----------|-----------|-----------|----|-----------|-----------|-----------|
| C | -3.220388 | -1.718984 | 0.171112  | H  | -1.531534 | -2.886817 | 1.997769  |
| C | -3.869349 | 0.815362  | 1.304594  | H  | -2.915534 | -3.872149 | 2.475256  |
| C | -2.171864 | 1.925952  | -0.228740 | H  | -1.333928 | -4.628366 | 2.196933  |
| C | -4.261132 | -1.566916 | 1.089395  | C  | -2.144988 | -6.981902 | -2.106111 |
| C | -4.570352 | -0.340899 | 1.690615  | H  | -2.042057 | -6.942297 | -3.195881 |
| C | -0.782913 | 2.034573  | -0.049399 | H  | -1.232101 | -7.428584 | -1.696152 |
| C | -2.866656 | 2.978317  | -0.875017 | H  | -2.970621 | -7.671052 | -1.881327 |
| H | -4.835476 | -2.447998 | 1.367514  | C  | -5.638061 | -0.319458 | 2.775201  |
| C | -0.092708 | 3.239143  | -0.278853 | C  | -6.091393 | 1.090106  | 3.168458  |
| C | -2.184382 | 4.174639  | -1.162748 | C  | -4.869056 | 1.996155  | 3.334978  |
| C | -0.833874 | 4.294815  | -0.816509 | C  | -4.136620 | 2.147128  | 1.995586  |
| C | 1.344950  | 3.431941  | 0.093453  | H  | -5.159537 | 2.986565  | 3.705926  |
| C | 2.323648  | 3.700361  | -0.887109 | H  | -6.746706 | 1.505674  | 2.389413  |
| C | 1.716862  | 3.424205  | 1.459970  | H  | -6.683354 | 1.048128  | 4.090688  |
| C | 3.648656  | 3.929396  | -0.491227 | H  | -5.238847 | -0.824706 | 3.667870  |
| C | 3.049793  | 3.661073  | 1.808800  | H  | -6.495977 | -0.923339 | 2.451626  |
| C | 4.036806  | 3.912816  | 0.850075  | H  | -4.740109 | 2.798464  | 1.348062  |
| H | 4.393414  | 4.139143  | -1.257688 | H  | -3.187975 | 2.676406  | 2.140684  |
| H | 3.322176  | 3.662655  | 2.862470  | H  | -4.193025 | 1.561699  | 4.085104  |
| C | 1.989591  | 3.777207  | -2.361469 | H  | -0.330387 | 5.243613  | -0.990000 |
| H | 1.696023  | 4.793929  | -2.655278 | C  | -2.885421 | 5.371503  | -1.789821 |
| H | 2.859154  | 3.506546  | -2.970284 | H  | -3.120343 | 6.096809  | -0.995199 |
| H | 1.161375  | 3.117733  | -2.627829 | H  | -2.193656 | 5.887298  | -2.467737 |
| C | 5.474841  | 4.145119  | 1.253672  | C  | -4.295255 | 2.778895  | -1.366587 |
| H | 5.542649  | 4.585173  | 2.254390  | C  | -4.181562 | 5.009858  | -2.523455 |
| H | 6.041849  | 3.204861  | 1.273125  | H  | -3.945457 | 4.497229  | -3.466816 |
| H | 5.984003  | 4.816516  | 0.553363  | H  | -4.727753 | 5.923542  | -2.787627 |
| C | 0.698806  | 3.204045  | 2.557332  | C  | -5.039372 | 4.088682  | -1.651830 |
| H | -0.163148 | 3.871774  | 2.443742  | H  | -4.242977 | 2.197124  | -2.300592 |
| H | 0.313608  | 2.178375  | 2.549351  | H  | -4.866894 | 2.155858  | -0.675942 |
| H | 1.143868  | 3.389857  | 3.539827  | H  | -5.276928 | 4.597850  | -0.706298 |
| C | -2.912829 | -3.059390 | -0.419077 | H  | -5.996100 | 3.867787  | -2.140599 |
| C | -2.357725 | -4.079144 | 0.383827  | Ni | 1.055932  | -1.959492 | 0.684052  |
| C | -3.213912 | -3.318828 | -1.773959 | C  | 8.470168  | -0.713137 | -0.805482 |
| C | -2.105116 | -5.331513 | -0.186964 | C  | 7.744211  | 0.445412  | -1.086938 |
| C | -2.953398 | -4.588220 | -2.299215 | C  | 6.464453  | 0.613307  | -0.560810 |
| C | -2.398182 | -5.609994 | -1.524000 | C  | 5.874816  | -0.370434 | 0.257747  |
| H | -1.656805 | -6.105356 | 0.432719  | C  | 6.624683  | -1.532152 | 0.533562  |
| H | -3.191884 | -4.782566 | -3.343524 | C  | 7.902021  | -1.699604 | 0.007798  |
| C | -3.815569 | -2.256258 | -2.666661 | H  | 9.468839  | -0.847598 | -1.211933 |
| H | -4.687789 | -1.781734 | -2.202185 | H  | 8.174376  | 1.219534  | -1.717157 |
| H | -3.091793 | -1.460725 | -2.879916 | H  | 5.898867  | 1.514053  | -0.787888 |
| H | -4.133319 | -2.686242 | -3.622051 | H  | 6.206913  | -2.307280 | 1.169321  |
| C | -2.019029 | -3.854563 | 1.841497  | H  | 8.461290  | -2.603416 | 0.235490  |

|   |          |           |           |
|---|----------|-----------|-----------|
| C | 4.525728 | -0.137005 | 0.775353  |
| H | 4.109932 | 0.846007  | 0.552916  |
| C | 3.752913 | -0.996310 | 1.480624  |
| H | 4.113404 | -1.995534 | 1.722100  |
| C | 2.421659 | -0.658827 | 1.956923  |
| H | 2.084282 | 0.358813  | 1.776524  |
| C | 1.642108 | -1.503964 | 2.706761  |
| H | 2.009480 | -2.471838 | 3.037589  |
| H | 0.719296 | -1.151543 | 3.160064  |
| C | 2.293007 | -6.009769 | 0.401614  |
| H | 2.198011 | -6.304222 | 1.452820  |
| H | 1.408868 | -6.372288 | -0.134258 |
| H | 3.182266 | -6.498287 | -0.017210 |
| C | 2.397696 | -4.491264 | 0.281801  |
| H | 3.314874 | -4.144202 | 0.790450  |
| H | 2.506129 | -4.211605 | -0.779650 |
| O | 1.250055 | -3.893346 | 0.857289  |
| H | 0.593191 | -3.111481 | -0.138738 |
